# Supplementary material for: Global, regional, and national incidence of six major immune-mediated inflammatory diseases: findings from the global burden of disease study 2019
Source: PubMed Central journal article supplement (PMC10507198; doi:10.1016/j.eclinm.2023.102193), 2023-09-09
Supplement: mmc1.pdf [file mmc1.pdf]

## Appendix

### Table of content

#### Authors' contributions

**Part 1.** Providing data or critical feedback on data sources

**Part 2.** Developing methods or computational machinery

**Part 3.** Providing critical feedback on methods or results

**Part 4.** Drafting the work or revising it critically for important intellectual content

**Part 5.** Managing the estimation or publications process

#### Supplementary figures

**sFigure 1.** The number of incident cases attributable to six immune mediated inflammatory diseases throughout human lifespan in 2019

**sFigure 2.** The rate of incidence attributable to six immune mediated inflammatory diseases throughout human lifespan in 2019

**sFigure 3.** The average annual percent change in number of incidents attributable to six immune mediated inflammatory diseases throughout human lifespan, 1990-2019

**sFigure 4.** The average annual percent change in rate of incidence attributable to six immune mediated inflammatory diseases throughout human lifespan, 1990-2019

**sFigure 5.** The incident cases and age-standardized rate of incidence attributable to overall immune mediated inflammatory diseases according to GBD regions in 2019

**sFigure 6.** The incident cases and age-standardized rate of incidence attributable to overall immune mediated inflammatory diseases according to gender in 2019

**sFigure 7.** The incident cases and age-standardized rate of incidence attributable to six immune mediated inflammatory diseases according to GBD regions in 2019

**sFigure 8.** The average annual percent change in number of incidents and age standardized rate of incidence attributable to six immune mediated inflammatory diseases across 21 GBD regions, 1990-2019

**sFigure 9.** The global map in number of incidents attributable to six immune mediated inflammatory diseases in 204 countries and territories, 2019

**sFigure 10.** The global map in age standardized rate of incidence attributable to six immune mediated inflammatory diseases in 204 countries and territories, 2019

**sFigure 11.** The global map in average annual percent change in number of incidence attributable to six immune mediated inflammatory diseases in 204 countries and territories, 1990-2019

**sFigure 12.** The global map in average annual percent change in age standardized rate of incidence attributable to six immune mediated inflammatory diseases in 204 countries and territories, 1990-2019

**sFigure 13.** Age standardized rate of incidence attributable to six immune mediated inflammatory diseases per 100 000 persons for sociodemographic index by 21 GBD regions, 2019

**sFigure 14.** Age standardized rate of incidence attributable to six immune mediated inflammatory diseases per 100 000 persons for sociodemographic index by 204 countries and territories, 2019

**sFigure 15.** The correlation between average annual percent change and age standardized rate of incidence attributable to six immune mediated inflammatory in 1990 across 204 countries and territories

**sFigure 16.** The correlation between average annual percent change and socio-demographic index attributable to six immune mediated inflammatory in 2019 across 204 countries and territories

#### Supplementary table

**sTable 1.** The incident cases and rate of incidence attributable to overall immune mediated inflammatory diseases across 20 age groups, and its temporal trends from 1990 to 2019

**sTable 2.** The incident cases and rate of incidence attributable to six immune mediated inflammatory diseases across 20 age groups, and its temporal trends from 1990 to 2019

**sTable 3.** The incident cases and age-standardized rate of incidence attributable to overall immune mediated inflammatory diseases according to 204 countries and territories and its temporal trends from 1990 to 2019

**sTable 4.** The incident cases and age-standardized rate of incidence attributable to six immune mediated inflammatory diseases according to SDI regions and its temporal trends from 1990 to 2019.

**sTable 5.** The incident cases and age-standardized rate of incidence attributable to six immune mediated inflammatory diseases according to GBD regions and its temporal trends from 1990 to 2019.

**sTable 6.** The incident cases and age-standardized rate of incidence attributable to six immune mediated inflammatory diseases according to countries and territories and its temporal trends from 1990 to 2019.

## Authors' contributions

### Part 1. Providing data or critical feedback on data sources

Melsew Dagne Abate, Mohammadreza Abbasian, Aidin Abedi, Hassan Abidi, Richard Gyan Aboagye, Hassan Abolhassani, Qorinah Estiningtyas Sakilah Adnani, Mohsen Afarideh, Danish Ahmad, Sajjad Ahmad, Sohail Ahmad, Ali Ahmadi, Ayman Ahmed, Janardhana P Aithala, Abdullateef Abiodun Ajadi, Fares Alahdab, Mohammad T AlBataineh, Liaqat Ali, Sheikh Mohammad Alif, Joseph Uy Almazan, Sami Almustanyir, Jaber S Alqahtani, Ihsan Ullah Khan Altaf, Nelson Alvis-Guzman, Nelson J Alvis-Zakzuk, Hany Aly, Hubert Amu, Ganiyu Adeniyi Amusa, Jalal Arabloo, Reza Arefnezhad, Judie Arulappan, Tahira Ashraf, Jamila Abdulhamid Atata, Seyyed Shamsadin Athari, Maha Moh'd Wahbi Atout, Ahmed Y Azzam, Alaa Badawi, Ashish D Badiye, Sara Bagherieh, Atif Amin Baig, Mainak Bardhan, Nebiyu Simegnew Bayileyeegn, Uzma Iqbal Belgaumi, Akshaya Srikanth Bhagavathula, Sonu Bhaskar, Ajay Nagesh Bhat, Archith Bolor, João Silva Botelho, Luis Alberto Cámera, Vijay Kumar Chattu, Dinh-Toi Chu, Rosa A S Couto, Natália Cruz-Martins, Xiaochen Dai, Giovanni Damiani, Ana Maria Dascalu, Andreas K Demetriades, Hardik Dineshbhai Desai, Rupak Desai, Sourav Dey, Samath Dhamminda Dharmaratne, Thanh Chi Do, Masoud Dodangeh, Milad Dodangeh, Michael Ekholuenetale, Temitope Cyrus Ekundayo, Ahmed O Elmehraht, Hawi Leul Esayas, Adeniyi Francis Fagbamigbe, Ildar Ravisovich Fakhradiyev, Ali Fatehizadeh, Alireza Feizkhah, Ginenus Fekadu, Seyed-Mohammad Fereshtehnejad, João C Fernandes, Pietro Ferrara, Takeshi Fukumoto, Maryam Gholamalizadeh, Mahaveer Golechha, Pouya Goleij, Vivek Kumar Gupta, Rabih Halwani, Shafiul Haque, Ikramul Hasan, Reza Hashempour, Treska S Hassan, Johannes Haubold, Reza Heidari-Soureshjani, Claudiu Herteliu, Kamran Hessami, Hong-Han Huynh, Segun Emmanuel Ibitoye, Farideh Iravanpour, Nahlah Elkudssiah Ismail, Morteza Jafarinia, Haitham Jahrami, Mihajlo Jakovljevic, Manthan Dilipkumar Janodia, Sathish Kumar Jayapal, Shubha Jayaram, Jost B Jonas, Abel Joseph, Nitin Joseph, Charity Ehimwenma Joshua, Billingsley Kaambwa, Zubair Kabir, Vidya Kadashetti, Feroze Kaliyadan, Himal Kandel, Ibraheem M Karaye, Yousef Saleh Khader, Himanshu Khajuria, Faham Khamesipour, Imteyaz A Khan, Maseer Khan, Moien AB Khan, Muhammad Arslan Khan, Sorour Khateri, Adnan Kisa, Sezer Kisa, Hyun Yong Koh, Pavel Kolkhir, Oleksii Korzh, Chandrakant Lahariya, Tri Laksono, Kamaluddin Latief, Basira Kankia Lawal, Thao Thi Thu Le, Seung Won Lee, Yo Han Lee, Wei Li, Virendra S Ligade, Stephen S Lim, Gang Liu, Xuefeng Liu, Vanessa Sintra Machado, Azzam A Maghazachi, Tuan A Mai, Pantea Majma Sanaye, Kashish Malhotra, Deborah Carvalho Malta, Mohammad Ali Mansournia, Ritesh G Menezes, Irmina Maria Michalek, Le Huu Nhat Minh, Erkin M Mirrakhimov, Awoke Misganaw, Soheil Mohammadi, Salahuddin Mohammed, Shafiu Mohammed, Ali H Mokdad, Sara Momtazmanesh, Mohammad Ali Moni, Yousef Moradi, Ebrahim Mostafavi, George Duke Mukoro, Admir Mulita, Getaneh Baye Mulu, Efrén Murillo-Zamora, Ghulam Mustafa, Sreenivas Narasimha Swamy, Zuhair S Natto, Biswa Prakash Nayak, Dang H Nguyen, Hien Quang Nguyen, Phat Tuan Nguyen, Van Thanh Nguyen, Robina Khan Niazi, Taxiarchis Konstantinos Nikolouzakakis, Lawrence Achilles Nnyanzi, Bogdan Oancea, Osaretin Christabel Okonji, Patrick Godwin Okwute, Andrew T Olagunju, Michal Ordak, Mayowa O Owolabi, Mahesh P A, Adrian Pana, Shahina Pardhan, Jay Patel, Shankargouda Patil, Uttam Paudel, Shrikant Pawar, Paolo Pedersini, David M Pereira, Jeevan Pereira, Renato B Pereira, Mario F P Peres, Arokiasamy Perianayagam, Simone Perna, Hoang Tran Pham, Anil K Philip, Vivek Podder, Elton Junio Sady Prates, Fakher Rahim, Mehran Rahimi, Vafa Rahimi-Movaghar, Amir Masoud Rahmani, Shayan Rahmani, Nemanja Rancic, Sina Rashedi, Ahmed Mustafa Rashid, Salman Rawaf, Elrashdy Moustafa Mohamed Redwan, Nima Rezaei, Jefferson Antonio Buendia Rodriguez, Leonardo Roever, Esperanza Romero-Rodríguez, Aly M A Saad, Basema Saddik, Umar Saeed, Narjes Saheb Sharif-Askari, Mohammad Ali Sahraian, Mirza Rizwan Sajid, Sateesh Sakhamuri, Mohamed A Saleh, Sara Samadzadeh, Abdallah M Samy, Monika Sawhney, Yashendra Sethi, Samiah Shahid, Masood Ali Shaikh, Maryam Shayan, Jae Il Shin, K M Shivakumar, Parnian Shobeiri, Soraya Siabani, Inderbir Singh, Jasvinder A Singh, Paramdeep Singh, Solikhah Solikhah, Yonatan Solomon, Mohammad Sadegh Soltani-Zangbar, Jing Sun, Mindy D Szeto, Rafael Tabarés-Seisdedos, Mohammad Tabish, Lai-shan Tam, Ker-Kan Tan, Mohamad-Hani Temsah, Pugazhenthana Thangaraju, Nigusie Selomon Tibebe, Jansje Henny Vera Ticoalu, Tala Tillawi, Amir Tiyuri, Marcos Roberto Tovani-Palone, Manjari Tripathi, Guesh Mebrahtom Tsegay, Abdul Rohim Tualeka, Saif Ullah, Sana Ullah, Muhammad Umair, Srikanth Umakanthan, Era Upadhyay, Sahel Valadan Tahbaz, Shoban Babu Varthya, Tommi Juhani Vasankari, Narayanaswamy Venketasubramanian, Georgios-Ioannis Verras, Vasily Vlassov, Yasir Waheed, Ronny Westerman, Dakshitha Praneeth Wickramasinghe, Beshada Zerfu Woldegeorgis, Dongze Wu, Dereje Y Yada, Galal Yahya,

Dong Keon Yon, Naohiro Yonemoto, Iman Zare, Mohammad A Zeineddine, Naod Gebrekrstos Zeru, Magdalena Zielińska, Mohammad Zoladl.

## **Part 2. Developing methods or computational machinery**

Qorinah Estiningtyas Sakilah Adnani, Ali Ahmadi, Ibrahim Alqasmi, Hubert Amu, Ahmed Y Azzam, Akshaya Srikanth Bhagavathula, Dinh-Toi Chu, Kaleb Coberly, Rosa A S Couto, Xiaochen Dai, Hardik Dineshbhai Desai, Thanh Chi Do, Ali Fatehizadeh, Mohammad Heidari, Hong-Han Huynh, Farideh Iravanpour, Morteza Jafarinia, Sathish Kumar Jayapal, Leila Keikavoosi-Arani, Sorour Khateri, Adnan Kisa, Thao Thi Thu Le, Tuan A Mai, Seyede Zahra Masoumi, Le Huu Nhat Minh, Ali H Mokdad, Mohammad Ali Moni, Yousef Moradi, Admir Mulita, Dang H Nguyen, Hien Quang Nguyen, Phat Tuan Nguyen, Van Thanh Nguyen, Hoang Tran Pham, Amir Masoud Rahmani, Premkumar Ramasubramani, Umar Saeed, Abdallah M Samy, Ganesh Kumar Saya, Razieh Tavakoli Oliaee, Ronny Westerman, Melat Woldemariam, Dongze Wu, Naohiro Yonemoto.

## **Part 3. Providing critical feedback on methods or results**

Melsew Dagne Abate, Mohammadreza Abbasian, Michael Abdelmasseh, Mohammad-Amin Abdollahifar, Deldar Morad Abdulah, Aidin Abedi, Vida Abedi, Hassan Abidi, Richard Gyan Aboagye, Hassan Abolhassani, Katrina Abuabara, Isaac Yeboah Addo, Kayode Nelson Adeniji, Abiola Victor Adepoju, Miracle Ayomikun Adesina, Qorinah Estiningtyas Sakilah Adnani, Mohsen Afarideh, Shahin Aghamiri, Antonella Agodi, Anurag Agrawal, Constanza Elizabeth Aguilera Arriagada, Aqeel Ahmad, Danish Ahmad, Sajjad Ahmad, Sohail Ahmad, Ali Ahmadi, Ali Ahmed, Ayman Ahmed, Janardhana P Aithala, Abdullateef Abiodun Ajadi, Mostafa Akbarzadeh-Khiavi, Fares Alahdab, Mohammad T AlBataineh, Sharifullah Alemi, Adel Ali Saeed Al-Gheethi, Liaqat Ali, Sheikh Mohammad Alif, Sami Almustanyir, Jaber S Alqahtani, Ihsan Ullah Khan Altaf, Nelson Alvis-Guzman, Nelson J Alvis-Zakzuk, Hany Aly, Reza Amani, Hubert Amu, Ganiyu Adeniyi Amusa, Catalina Liliana Andrei, Anayochukwu Edward Anyasodor, Jalal Arabloo, Judie Arulappan, Mohammad Asghari-Jafarabadi, Tahira Ashraf, Jamila Abdulhamid Atata, Seyyed Shamsadin Athari, Daniel Atlaw, Maha Moh'd Wahbi Atout, Avinash Aujayeb, Asma Tahir Awan, Haleh Ayatollahi, Sina Azadnajafabad, Ahmed Y Azzam, Alaa Badawi, Ashish D Badiye, Sara Bagherieh, Atif Amin Baig, Berihun Bantie Bantie, Martina Barchitta, Mainak Bardhan, Suzanne Lyn Barker-Collo, Kavita Batra, Nebiyu Simegnew Bayileyeegn, Amir Hossein Behnoush, Uzma Iqbal Belgaumi, Maryam Bemanalizadeh, Isabela M Bensenor, Akshaya Srikanth Bhagavathula, Pankaj Bhardwaj, Sonu Bhaskar, Ajay Nagesh Bhat, Veera R Bitra, Archith Bolor, Kaustubh Bora, João Silva Botelho, Rachele Buchbinder, Luis Alberto Cámera, Andre F Carvalho, Vijay Kumar Chattu, Endeshaw Chekol Abebe, Fatemeh Chichagi, Sungchul Choi, Tzu-Chieh Chou, Dinh-Toi Chu, Vera Marisa Costa, Rosa A S Couto, Natália Cruz-Martins, Omid Dadras, Xiaochen Dai, Giovanni Damiani, Ana Maria Dascalu, Mohsen Dashti, Sisay Abebe Debela, Andreas K Demetriades, Alemayehu Anley Demlash, Xinlei Deng, Hardik Dineshbhai Desai, Rupak Desai, Sourav Dey, Samath Dhamminda Dharmaratne, Daniel Diaz, Mahmoud Dibas, Ricardo Jorge Dinis-Oliveira, Mengistie Diress, Thanh Chi Do, Duy Khanh Doan, Masoud Dodangeh, Milad Dodangeh, Deepa Dongarwar, Arkadiusz Marian Dziejczak, Abdelaziz Ed-Dra, Hisham Atan Edinur, Negin Eissazade, Michael Ekholuenetale, Temitope Cyrus Ekundayo, Noha Mousaad Elemam, Muhammed Elhadi, Ahmed O Elmeharth, Omar Abdelsadek Abdou Elmeligy, Mehdi Emamverdi, Hawi Leul Esayas, Habitu Birhan Eshetu, Farshid Etaee, Adeniyi Francis Fagbamigbe, Shahriar Faghani, Ildar Ravisovich Fakhradiyev, Ali Fatehizadeh, Mobina Fathi, Alireza Feizkhah, Mohammad Fereidouni, Seyed-Mohammad Fereshtehnejad, João C Fernandes, Pietro Ferrara, Getahun Fetensa, Irina Filip, Florian Fischer, Behzad Foroutan, Masoud Foroutan, Takeshi Fukumoto, Balasankar Ganesan, Belete Negese Belete Gameda, MohammadReza Ghasemi, Mohamad Goldust, Mahaveer Golechha, Davide Golinelli, Houman Goudarzi, Shi-Yang Guan, Cui Guo, Bhawna Gupta, Vivek Kumar Gupta, Rasool Haddadi, Najah R Hadi, Rabih Halwani, Shafiul Haque, Ikramul Hasan, Reza Hashempour, Treska S Hassan, Sara Hassanzadeh, Mohammed Bheser Hassen, Johannes Haubold, Khezar Hayat, Golnaz Heidari, Mohammad Heidari, Reza Heidari-Soureshjani, Claudiu Herteliu, Kamran Hessami, Kamal Hezam, Yuta Hiraike, Ramesh Holla, Mohammad-Salar Hosseini, Hong-Han Huynh, Bing-Fang Hwang, Segun Emmanuel Ibitoye, Irena M Ilic, Milena D Ilic, Farideh Iravanpour, Nahlah Elkudssiah Ismail, Masao Iwagami, Chidozie C D Iwu, Louis Jacob, Morteza Jafarinia, Abdollah Jafarzadeh, Haitham Jahrami, Mihajlo Jakovljevic, Elham Jamshidi, Chinmay T Jani, Sathish Kumar Jayapal, Shubha Jayaram, Jayakumar Jeganathan, Jost B Jonas, Abel Joseph, Nitin Joseph, Charity Ehimwenma Joshua, Vaishali K, Billingsley Kaambwa, Ali Kabir, Zubair Kabir, Vidya Kadashetti, Feroze Kaliyadan, fatemeh kalroozi, Vineet Kumar Kamal, Himal

Kandel, Srikanta Kanungo, Jafar Karami, Ibraheem M Karaye, Hanie Karimi, Sina Kazemian, Sewnet Adem Kebede, Leila Keikavoosi-Arani, Mohammad Keykhaei, Yousef Saleh Khader, Himanshu Khajuria, Faham Khamesipour, Ejaz Ahmad Khan, Imteyaz A Khan, Maseer Khan, Md Jobair Khan, Moien AB Khan, Muhammad Arslan Khan, Haitham Khatatbeh, Moawiah Mohammad Khatatbeh, Sorour Khateri, Min Seo Kim, Adnan Kisa, Sezer Kisa, Hyun Yong Koh, Pavel Kolkhir, Oleksii Korzh, Ashwin Laxmikant Kotnis, Ai Koyanagi, Mohammed Kuddus, Narinder Kumar, Satyajit Kundu, Om P Kurmi, Carlo La Vecchia, Chandrakant Lahariya, Tri Laksono, Judit Lám, Kamaluddin Latief, Paolo Lauriola, Basira Kankia Lawal, Thao Thi Thu Le, Seung Won Lee, Wei-Chen Lee, Yo Han Lee, Jacopo Lenzi, Wei Li, Virendra S Ligade, Stephen S Lim, Gang Liu, Xuefeng Liu, Erand Llanaj, Chun-Han Lo, Vanessa Sintra Machado, Azzam A Maghazachi, Mansour Adam Mahmoud, Tuan A Mai, Azeem Majeed, Omar Mohamed Makram, Elaheh Malakan Rad, Kashish Malhotra, Ahmad Azam Malik, Iram Malik, Tauqeer Hussain Mallhi, Deborah Carvalho Malta, Mohammad Ali Mansournia, Lorenzo Giovanni Mantovani, Miquel Martorell, Sahar Masoudi, Yasith Mathangasinghe, Elezebeth Mathews, Alexander G Mathioudakis, Andrea Maugeri, Mahsa Mayeli, John Robert Carabeo Medina, Gebrekiros Gebremichael Meles, Ritesh G Menezes, Tomislav Mestrovic, Irmina Maria Michalek, Ana Carolina Micheletti Gomide Nogueira de Sá, Ephrem Tesfaye Mihretie, Le Huu Nhat Minh, Reza Mirfakhraie, Erkin M Mirrakhimov, Awoke Misganaw, Ashraf Mohamadkhani, Nouh Saad Mohamed, Faezeh Mohammadi, Soheil Mohammadi, Salahuddin Mohammed, Shafiu Mohammed, Syam Mohan, Anita Mohseni, Ali H Mokdad, Sara Momtazmanesh, Mohammad Ali Moni, Md Moniruzzaman, Yousef Moradi, Negar Morovatdar, Ebrahim Mostafavi, George Duke Mukoro, Admir Mulita, Getaneh Baye Mulu, Efrén Murillo-Zamora, Fungai Musaiqwa, Ghulam Mustafa, Sathish Muthu, Firzan Nainu, Vinay Nangia, Sreenivas Narasimha Swamy, Zuhair S Natto, Navaraj Perumalsamy, Biswa Prakash Nayak, Athare Nazri-Panjaki, Hadush Negash, Dang H Nguyen, Hau Thi Hien Nguyen, Hien Quang Nguyen, Phat Tuan Nguyen, Van Thanh Nguyen, Robina Khan Niazi, Taxiarchis Konstantinos Nikolouzakis, Lawrence Achilles Nnyanzi, Mamoona Noreen, Chimezie Igwegbe Nzoputam, Ogochukwu Janet Nzoputam, Bogdan Oancea, Hassan Okati-Aliabad, Osaretin Christabel Okonji, Patrick Godwin Okwute, Andrew T Olagunju, Matthew Idowu Olatubi, Isaac Iyinoluwa Olufadewa, Michal Ordak, Nikita Otstavnov, Mayowa O Owolabi, Mahesh P A, Jagadish Rao Padubidri, Anton Pak, Reza Pakzad, Raffaele Palladino, Adrian Pana, Ioannis Pantazopoulos, Paraskevi Papadopoulou, Shahina Pardhan, Ashwaghosha Parthasarathi, Ava Pashaei, Jay Patel, Aslam Ramjan Pathan, Shankargouda Patil, Uttam Paudel, Shrikant Pawar, Paolo Pedersini, Umberto Pensato, David M Pereira, Jeevan Pereira, Maria Odete Pereira, Renato B Pereira, Mario F P Peres, Arokiasamy Perianayagam, Ionela-Roxana Petcu, Parmida Sadat Pezeshki, Hoang Tran Pham, Anil K Philip, Michael A Piradov, Indrashis Podder, Vivek Podder, Elton Junio Sady Prates, Ibrahim Qattee, Amir Radfar, Pourya Raei, Alireza Rafiei, Fakher Rahim, Mehran Rahimi, Vafa Rahimi-Movaghar, Md Obaidur Rahman, Mosiur Rahman, Muhammad Aziz Rahman, Amir Masoud Rahmani, Mohamed Rahmani, Vahid Rahmanian, Premkumar Ramasubramani, Nemanja Rancic, Sina Rashedi, Ahmed Mustafa Rashid, Nakul Ravikumar, Salman Rawaf, Elrashdy Moustafa Mohamed Redwan, Nazila Rezaei, Negar Rezaei, Mohsen Rezaeian, Daniela Ribeiro, Mónica Rodrigues, Jefferson Antonio Buendia Rodriguez, Leonardo Roever, Esperanza Romero-Rodríguez, Aly M A Saad, Basema Saddik, Saeid Sadeghian, Umar Saeed, Azam Safary, Mahdi Safdarian, Sher Zaman Safi, Amene Saghazadeh, Fatemeh Saheb Sharif-Askari, Narjes Saheb Sharif-Askari, Harihar Sahoo, Mohammad Ali Sahraian, Mirza Rizwan Sajid, Sateesh Sakhamuri, Joseph W Sakshaug, Mohamed A Saleh, Sana Salehi, Amir Salek Farrokhi, Sara Samadzadeh, Noosha Samieefar, Abdallah M Samy, Nima Sanadgol, Rama Krishna Sanjeev, Monika Sawhney, Ganesh Kumar Saya, Art Schuermans, Subramanian Senthilkumaran, Sadaf G Sepanlou, Yashendra Sethi, Mahan Shafie, Humaira Shah, Izza Shahid, Samiah Shahid, Masood Ali Shaikh, Sadaf Sharfaei, Maryam Shayan, Hatem Samir Shehata, Aziz Sheikh, Jeevan K Shetty, Jae Il Shin, Reza Shirkoohi, Nebiyu Aniley Shitaye, K M Shivakumar, Parnian Shobeiri, Soraya Siabani, Migbar Mekonnen Sibhat, Emmanuel Edwar Siddig, Ehsan Sinaei, Inderbir Singh, Jasvinder A Singh, Paramdeep Singh, Surjit Singh, Md Shahjahan Siraj, Abdullah Al Mamun Sohag, Yonatan Solomon, Mohammad Sadegh Soltani-Zangbar, Jing Sun, Mindy D Szeto, Rafael Tabarés-Seisdedos, Seyyed Mohammad Tabatabaei, Mohammad Tabish, Ensiyeh Taheri, Azin Tahvildari, Iman M Talaat, Lai-shan Tam, Jacques JL Lukenze Tamuzi, Ker-Kan Tan, Raziieh Tavakoli Oliaee, Arian Tavasol, Mohamad-Hani Temsah, Pugazhenthana Thangaraju, Samar Tharwat, Jansje Henny Vera Ticoalu, Tala Tillawi, Tenaw Yimer Tiruye, Amir Tiyuri, Marcos Roberto Tovani-Palone, Manjari Tripathi, Guesh Mebrahtom Tsegay, Sree Sudha Ty, Chukwudi S Ubah, Saif Ullah, Sana Ullah, Srikanth Umakanthan, Era Upadhyay, Seyyed Mohammad Vahabi, Asokan Govindaraj Vaithinathan, Sahel

Valadan Tahbaz, Rohollah Valizadeh, Shoban Babu Varthya, Narayanaswamy Venketasubramanian, Georgios-Ioannis Verras, Jorge Hugo Villafañe, Vasily Vlassov, Danh Cao Vo, Yasir Waheed, Abdul Waris, Brhane Gebrehiwot Welegebrial, Ronny Westerman, Dakshitha Praneeth Wickramasinghe, Nuwan Darshana Wickramasinghe, Barbara Willekens, Beshada Zerfu Woldegeorgis, Dongze Wu, Yuhan Xing, Galal Yahya, Lin Yang, Fereshteh Yazdanpanah, Dong Keon Yon, Naohiro Yonemoto, Yuyi You, Mazyar Zahir, Syed Saoud Zaidi, Moein Zangiabadian, Mohammad A Zeineddine, Dawit T Zemedikun, Naod Gebrekrstos Zeru, Chen Zhang, Hanqing Zhao, Chenwen Zhong, Magdalena Zielińska, Mohammad Zoladl, Alimuddin Zumla.

#### **Part 4. Drafting the work or revising it critically for important intellectual content**

Melsew Dagne Abate, Mohammadreza Abbasian, Mohsen Abbasi-Kangevari, Zeinab Abbasi-Kangevari, Foad Abd-Allah, Michael Abdelmasseh, Aidin Abedi, Hassan Abidi, Hassan Abolhassani, Katrina Abuabara, Morteza Abyadeh, Isaac Yeboah Addo, Kayode Nelson Adeniji, Abiola Victor Adepoju, Qorinah Estiningtyas Sakilah Adnani, Antonella Agodi, Constanza Elizabeth Aguilera Arriagada, Danish Ahmad, Ali Ahmadi, Ali Ahmadi, Ali Ahmed, Ali Ahmed, Ayman Ahmed, Janardhana P Aithala, Abdullateef Abiodun Ajadi, Marjan Ajami, Fares Alahdab, Mohammad T AlBataineh, Liaqat Ali, Sami Almustanyir, Jaber S Alqahtani, Ihsan Ullah Khan Altaf, Nelson Alvis-Guzman, Nelson J Alvis-Zakzuk, Yaser Mohammed Al-Worafi, Hany Aly, Reza Amani, Hubert Amu, Ganiyu Adeniyi Amusa, Catalina Liliana Andrei, Adnan Ansar, Hossein Ansariniya, Anayochukwu Edward Anyasodor, Jalal Arabloo, Judie Arulappan, Jamila Abdulhamid Atata, Seyyed Shamsadin Athari, Daniel Atlaw, Maha Moh'd Wahbi Atout, Avinash Aujayeb, Sina Azadnajafabad, Ahmed Y Azzam, Alaa Badawi, Ashish D Badiye, Sara Bagherieh, Atif Amin Baig, Martina Barchitta, Mainak Bardhan, Suzanne Lyn Barker-Collo, Francesco Barone-Adesi, Kavita Batra, Amir Hossein Behnoush, Uzma Iqbal Belgaumi, Maryam Bemanalizadeh, Isabela M Bensenor, Kebede A Beyene, Akshaya Srikanth Bhagavathula, Sonu Bhaskar, Ajay Nagesh Bhat, Saeid Bitaraf, Veera R Bitra, Kaustubh Bora, João Silva Botelho, Daniela Calina, Luis Alberto Cámara, Andre F Carvalho, Jeffrey Shi Kai Chan, Vijay Kumar Chattu, Fatemeh Chichagi, Sungchul Choi, Dinh-Toi Chu, Vera Marisa Costa, Rosa A S Couto, Natália Cruz-Martins, Giovanni Damiani, Robert Paul Dellavalle, Andreas K Demetriades, Hardik Dineshbhai Desai, Syed Masudur Rahman Dewan, Sourav Dey, Samath Dhamminda Dharmaratne, Daniel Diaz, Mahmoud Dibas, Ricardo Jorge Dinis-Oliveira, Thanh Chi Do, Masoud Dodangeh, Milad Dodangeh, Deepa Dongarwar, John Dube, Arkadiusz Marian Dzedzic, Negin Eissazade, Noha Mousaad Elemam, Muhammed Elhadi, Ahmed O Elmehrath, Omar Abdelsadek Abdou Elmeligy, Mehdi Emamverdi, Theophilus I Emeto, Habitu Birhan Eshetu, Farshid Etaee, Adeniyi Francis Fagbamigbe, Shahriar Faghani, Ali Fatehizadeh, Mobina Fathi, Mohammad Fereidouni, Seyed-Mohammad Fereshtehnejad, João C Fernandes, Pietro Ferrara, Getahun Fetensa, Irina Filip, Florian Fischer, Masoud Foroutan, Takeshi Fukumoto, Balasankar Ganesan, Seyyed-Hadi Ghamari, MohammadReza Ghasemi, Tiffany K Gill, Richard F Gillum, Mohamad Goldust, Davide Golinelli, Shi-Yang Guan, Cui Guo, Bhawna Gupta, Veer Bala Gupta, Vivek Kumar Gupta, Najah Hadi, Najah R Hadi, Rabih Halwani, Shafiul Haque, Ikramul Hasan, Amr Hassan, Treska S Hassan, Sara Hassanzadeh, Johannes Haubold, Khezhar Hayat, Golnaz Heidari, Claudiu Herteliu, Kamran Hessami, Kamal Hezam, Yuta Hiraike, Ramesh Holla, Mohammad-Salar Hosseini, Hong-Han Huynh, Segun Emmanuel Ibitoye, Irena M Ilic, Milena D Ilic, Arad Iranmehr, Farideh Iravanpour, Nahlah Elkudssiah Ismail, Chidozie C D Iwu, Louis Jacob, Morteza Jafarinia, Abdollah Jafarzadeh, Kasra Jahankhani, Haitham Jahrami, Mihajlo Jakovljevic, Chinmay T Jani, Manthan Dilipkumar Janodia, Sathish Kumar Jayapal, Shubha Jayaram, Yingzhao Jin, Jost B Jonas, Abel Joseph, Nitin Joseph, Ali Kabir, Vidya Kadashetti, Feroze Kaliyadan, fatemeh kalroozi, Amit Kandel, Himal Kandel, Jafar Karami, Hanie Karimi, Hengameh Kasraei, Leila Keikavoosi-Arani, Yousef Saleh Khader, Himanshu Khajuria, Ejaz Ahmad Khan, Imteyaz A Khan, Maseer Khan, Md Jobair Khan, Moien Khan, Moien AB Khan, Muhammad Arslan Khan, Haitham Khatatbeh, Moawiah Mohammad Khatatbeh, Sorour Khateri, Hamid Reza Khayat Kashani, Min Seo Kim, Adnan Kisa, Sezer Kisa, Hyun Yong Koh, Pavel Kolkhir, Oleksii Korzh, Ashwin Laxmikant Kotnis, Parvaiz A Koul, Ai Koyanagi, Kewal Krishan, Mohammed Kuddus, Vishnuthethertha Vishnuthethertha Kulkarni, Narinder Kumar, Om P Kurmi, Carlo La Vecchia, Chandrakant Lahariya, Judit Lám, Kamaluddin Latief, Paolo Lauriola, Basira Kankia Lawal, Thao Thi Thu Le, Trang Thi Bich Le, Munjae Lee, Seung Won Lee, Jacopo Lenzi, Miriam Levi, Erand Llanaj, Chun-Han Lo, Vanessa Sintra Machado, Mansour Adam Mahmoud, Tuan A Mai, Azeem Majeed, Omar Mohamed Makram, Elaheh Malakan Rad, Ahmad Azam Malik, Iram Malik, Tauqeer Hussain Mallhi, Deborah Carvalho Malta,

Lorenzo Giovanni Mantovani, Miquel Martorell, Yasith Mathangasinghe, Elezebeth Mathews, Alexander G Mathioudakis, Andrea Maugeri, Mahsa Mayeli, Gebrekiros Gebremichael Meles, José João Mendes, Ritesh G Menezes, Tomislav Mestrovic, Irmina Maria Michalek, Ana Carolina Micheletti Gomide Nogueira de Sá, Ephrem Tesfaye Mihretie, Le Huu Nhat Minh, Reza Mirfakhraie, Awoke Misganaw, Faezeh Mohammadi, Salahuddin Mohammed, Shafiu Mohammed, Ali H Mokdad, Sara Momtazmanesh, Lorenzo Monasta, Mohammad Ali Moni, Negar Morovatdar, Ebrahim Mostafavi, Parsa Mousavi, George Duke Mukoro, Fungai Musaiigwa, Sathish Muthu, Firzan Nainu, Sreenivas Narasimha Swamy, Zuhair S Natto, Biswa Prakash Nayak, Hadush Negash, Mohammad Hadi Nematollahi, Dang H Nguyen, Hau Thi Hien Nguyen, Hien Quang Nguyen, Phat Tuan Nguyen, Van Thanh Nguyen, Robina Khan Niazi, Taxiarchis Konstantinos Nikolouzakakis, Lawrence Achilles Nnyanzi, Mamoon Noreen, Chimezie Igwegbe Nzopotam, Ogochukwu Janet Nzopotam, Bogdan Oancea, In-Hwan Oh, Osaretin Christabel Okonji, Patrick Godwin Okwute, Andrew T Olagunju, Matthew Idowu Olatubi, Michal Ordak, Nikita Otstavnov, Mayowa O Owolabi, Mahesh P A, Jagadish Rao Padubidri, Anton Pak, Reza Pakzad, Raffaele Palladino, Adrian Pana, Ioannis Pantazopoulos, Paraskevi Papadopoulou, Shahina Pardhan, Ashwaghosha Parthasarathi, Ava Pashaei, Jay Patel, Shankargouda Patil, Uttam Paudel, Shrikant Pawar, Paolo Pedersini, Umberto Pensato, David M Pereira, Jeevan Pereira, Maria Odete Pereira, Renato B Pereira, Mario F P Peres, Arokiasamy Perianayagam, Ionela-Roxana Petcu, Parmida Sadat Pezeshki, Hoang Tran Pham, Anil K Philip, Indrashis Podder, Vivek Podder, Dimitri Poddighe, Elton Junio Sady Prates, Amir Radfar, Alireza Rafiei, Alberto Raggi, Fakher Rahim, Mehran Rahimi, Mahban Rahimifard, Vafa Rahimi-Movaghar, Mohammad Hifz Ur Rahman, Shayan Rahmani, Premkumar Ramasubramani, Nemanja Rancic, Indu Ramachandra Rao, Nakul Ravikumar, Salman Rawaf, Elrashdy Moustafa Mohamed Redwan, Nazila Rezaei, Nima Rezaei, Daniela Ribeiro, Mónica Rodrigues, Jefferson Antonio Buendia Rodriguez, Leonardo Roever, Aly M A Saad, Basema Saddik, Umar Saeed, Mahdi Safdarian, Sher Zaman Safi, Dominic Sagoe, Fatemeh Saheb Sharif-Askari, Narjes Saheb Sharif-Askari, Amirhossein Sahebkar, Mohammad Ali Sahraian, Mirza Rizwan Sajid, Sateesh Sakhamuri, leili salehi, Amir Salek Farrokhi, Sara Samadzadeh, Saad Samargandy, Noosha Samieefar, Abdallah M Samy, Nima Sanadgol, Ganesh Kumar Saya, Art Schuermans, Sadaf G Sepanlou, Yashendra Sethi, Mahan Shafie, Izza Shahid, Samiah Shahid, Manoj Sharma, Jeevan K Shetty, K M Shivakumar, Velizar Shivarov, Parnian Shobeiri, Migbar Mekonnen Sibhat, Emmanuel Edwar Siddig, Colin R Simpson, Harpreet Singh, Jasvinder A Singh, Paramdeep Singh, Abdullah Al Mamun Sohag, Ranjan Solanki, Solikhah Solikhah, Yonatan Solomon, Seyyed Mohammad Tabatabaei, Mohammad Tabish, Ensiyeh Taheri, Iman M Talaat, Lai-shan Tam, Jacques JL Lukenze Tamuzi, Ker-Kan Tan, Nathan Y Tat, Razieh Tavakoli Oliaee, Arian Tavasol, Mohamad-Hani Temsah, Pugazhenthana Thangaraju, Samar Tharwat, Jansje Henny Vera Ticoalu, Tala Tillawi, Tenaw Yimer Tiruye, Marcos Roberto Tovani-Palone, Guesh Mebrahtom Tsegay, Sree Sudha Ty, Chukwudi S Ubah, Saif Ullah, Muhammad Umair, Srikanth Umakanthan, Era Upadhyay, Asokan Govindaraj Vaithinathan, Sahel Valadan Tahbaz, Shoban Babu Varthya, Tommi Juhani Vasankari, Narayanaswamy Venketasubramanian, Georgios-Ioannis Verras, Jorge Hugo Villafañe, Vasily Vlassov, Danh Cao Vo, Ronny Westerman, Dakshitha Praneeth Wickramasinghe, Nuwan Darshana Wickramasinghe, Barbara Willekens, Beshada Zerfu Woldegeorgis, Dongze Wu, Hong Xiao, Yuhan Xing, Galal Yahya, Lin Yang, Dong Keon Yon, Mazyar Zahir, Syed Saoud Zaidi, Iman Zare, Dawit T Zemedikun, Naod Gebrekrstos Zeru, Hanqing Zhao, Chenwen Zhong, Magdalena Zielińska, Mohammad Zoladl, Alimuddin Zumla.

#### **Part 5. Managing the estimation or publications process**

Melsew Dagne Abate, Ali Ahmadi, Ganiyu Adeniyi Amusa, Judie Arulappan, Ahmed Y Azzam, Rosa A S Couto, Thanh Chi Do, Ali Fatehizadeh, Yang Guo, Hong-Han Huynh, Farideh Iravanpour, Morteza Jafarinia, Sathish Kumar Jayapal, Jafar Karami, Chandrakant Lahariya, Thao Thi Thu Le, Tuan A Mai, Le Huu Nhat Minh, Ali H Mokdad, George Duke Mukoro, Getaneh Baye Mulu, Hien Quang Nguyen, Phat Tuan Nguyen, Van Thanh Nguyen, Mahesh P A, Hoang Tran Pham, Nemanja Rancic, Nima Rezaei, Aly M A Saad, Abdallah M Samy, Shoban Babu Varthya, Dongze Wu, Dong Keon Yon.

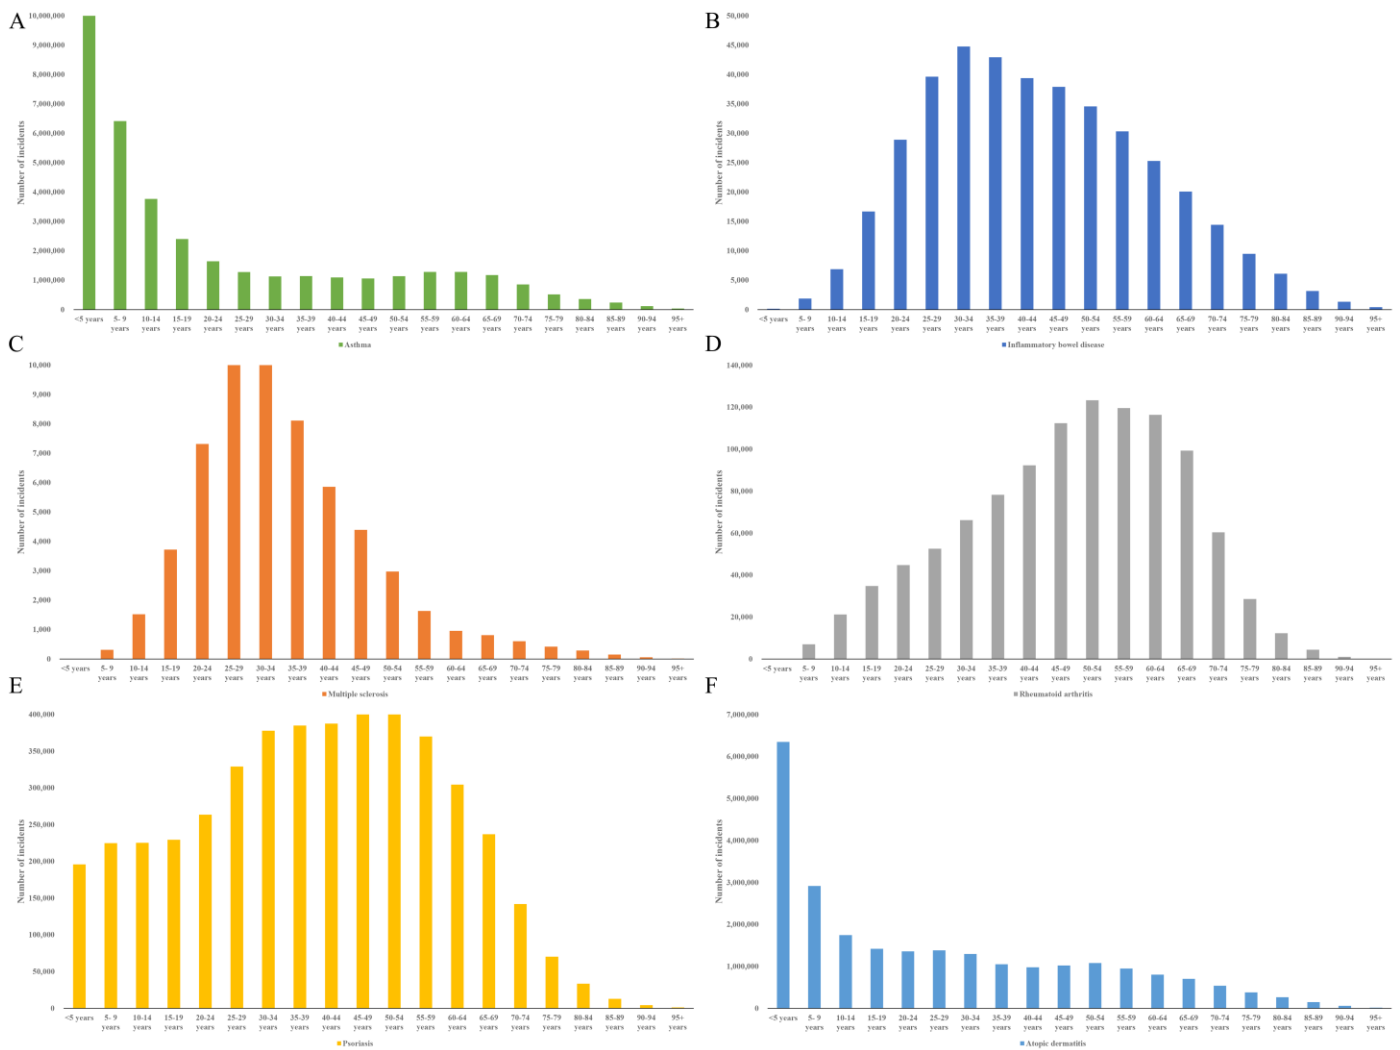

**Figure 1.** The number of incident cases attributable to six immune mediated inflammatory diseases throughout human lifespan in 2019

The number of incident cases attributable to asthma throughout human lifespan in 2019 (A),

The number of incident cases attributable to inflammatory bowel disease throughout human lifespan in 2019 (B),

The number of incident cases attributable to multiple sclerosis throughout human lifespan in 2019 (C),

The number of incident cases attributable to rheumatoid arthritis throughout human lifespan in 2019 (D),

The number of incident cases attributable to psoriasis throughout human lifespan in 2019(E),

The number of incident cases attributable to atopic dermatitis throughout human lifespan in 2019 (F).



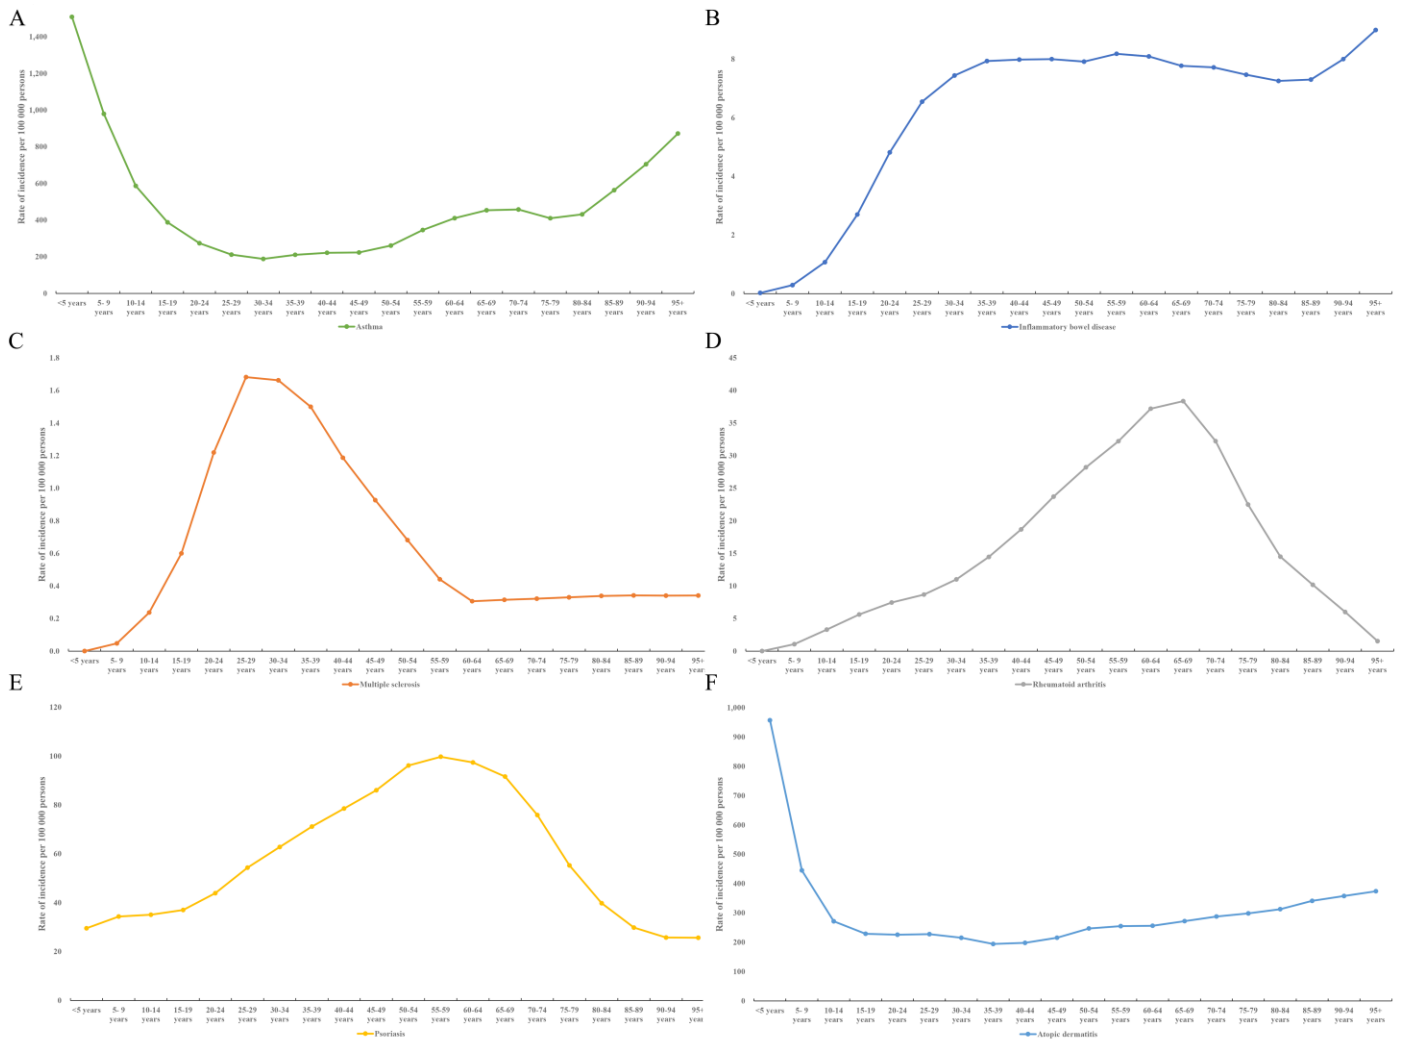

**sFigure 2.** The rate of incidence attributable to six immune mediated inflammatory diseases throughout human lifespan in 2019  
 The rate of incident cases attributable to asthma throughout human lifespan in 2019 (A),  
 The rate of incident cases attributable to inflammatory bowel disease throughout human lifespan in 2019 (B),  
 The rate of incident cases attributable to multiple sclerosis throughout human lifespan in 2019 (C),  
 The rate of incident cases attributable to rheumatoid arthritis throughout human lifespan in 2019 (D),  
 The rate of incident cases attributable to psoriasis throughout human lifespan in 2019 (E),  
 The rate of incident cases attributable to atopic dermatitis throughout human lifespan in 2019 (F),

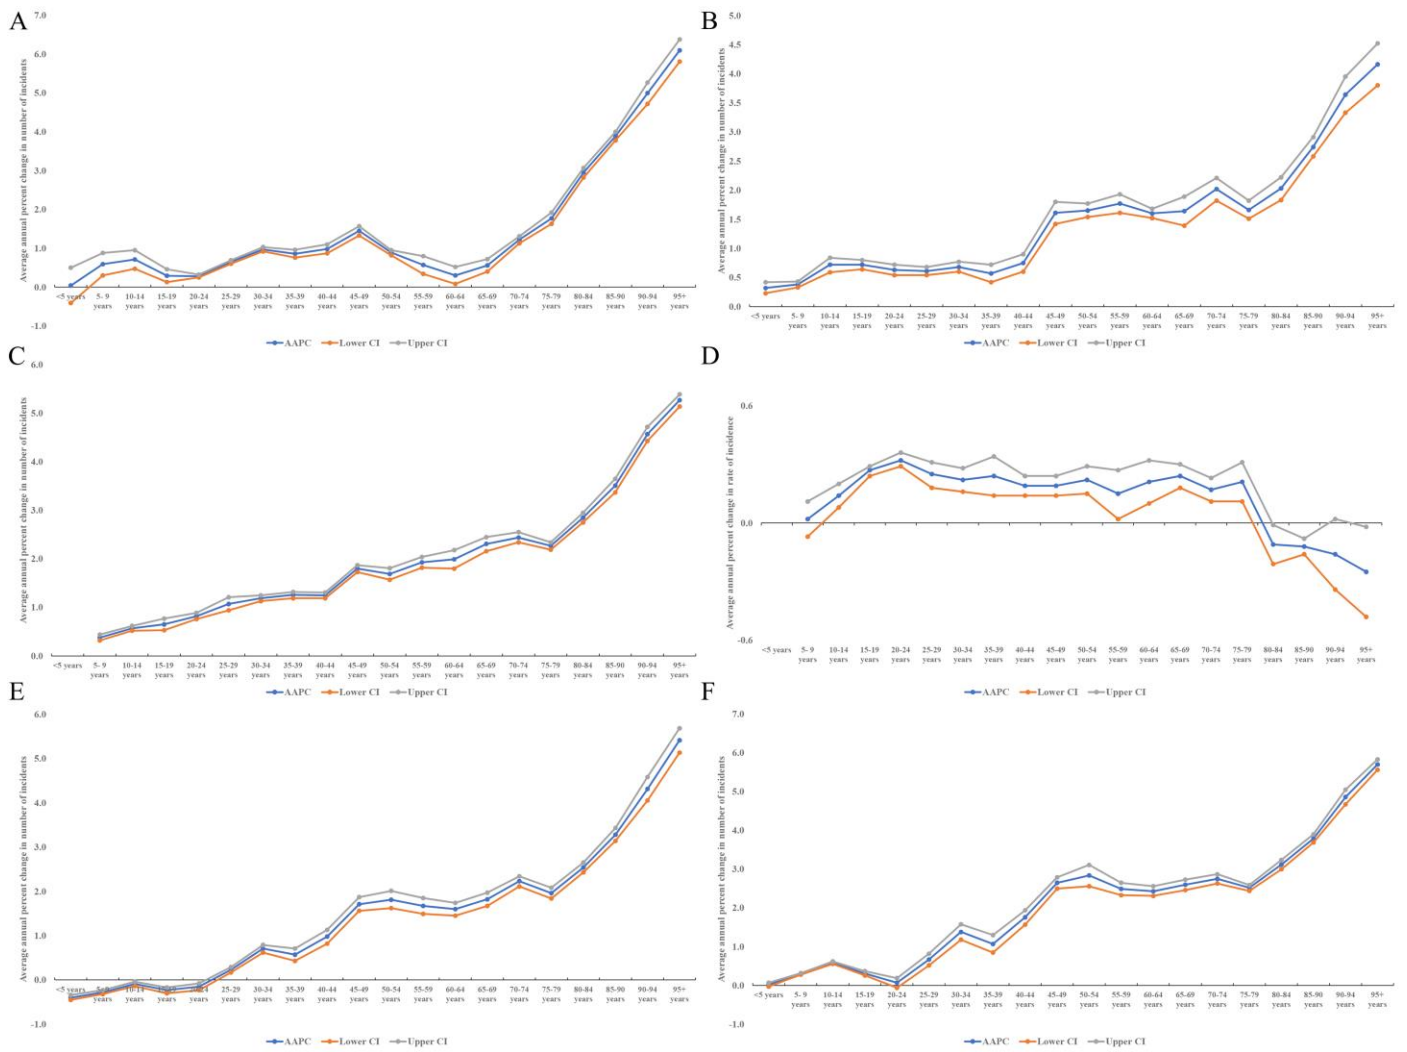

**Figure 3.** The average annual percent change in number of incidents attributable to six immune mediated inflammatory diseases throughout human lifespan, 1990-2019

The average annual percent change in number of incident cases attributable to asthma throughout human lifespan, 1990-2019 (A),

The average annual percent change in number of incident cases attributable to inflammatory bowel disease throughout human lifespan, 1990-2019(B),

The average annual percent change in number of incident cases attributable to multiple sclerosis throughout human lifespan, 1990-2019 (C),

The average annual percent change in number of incident cases attributable to rheumatoid arthritis throughout human lifespan, 1990-2019(D),

The average annual percent change in number of incident cases attributable to psoriasis throughout human lifespan, 1990-2019(E),

The average annual percent change in number of incident cases attributable to atopic dermatitis throughout human lifespan, 1990-2019 (F).

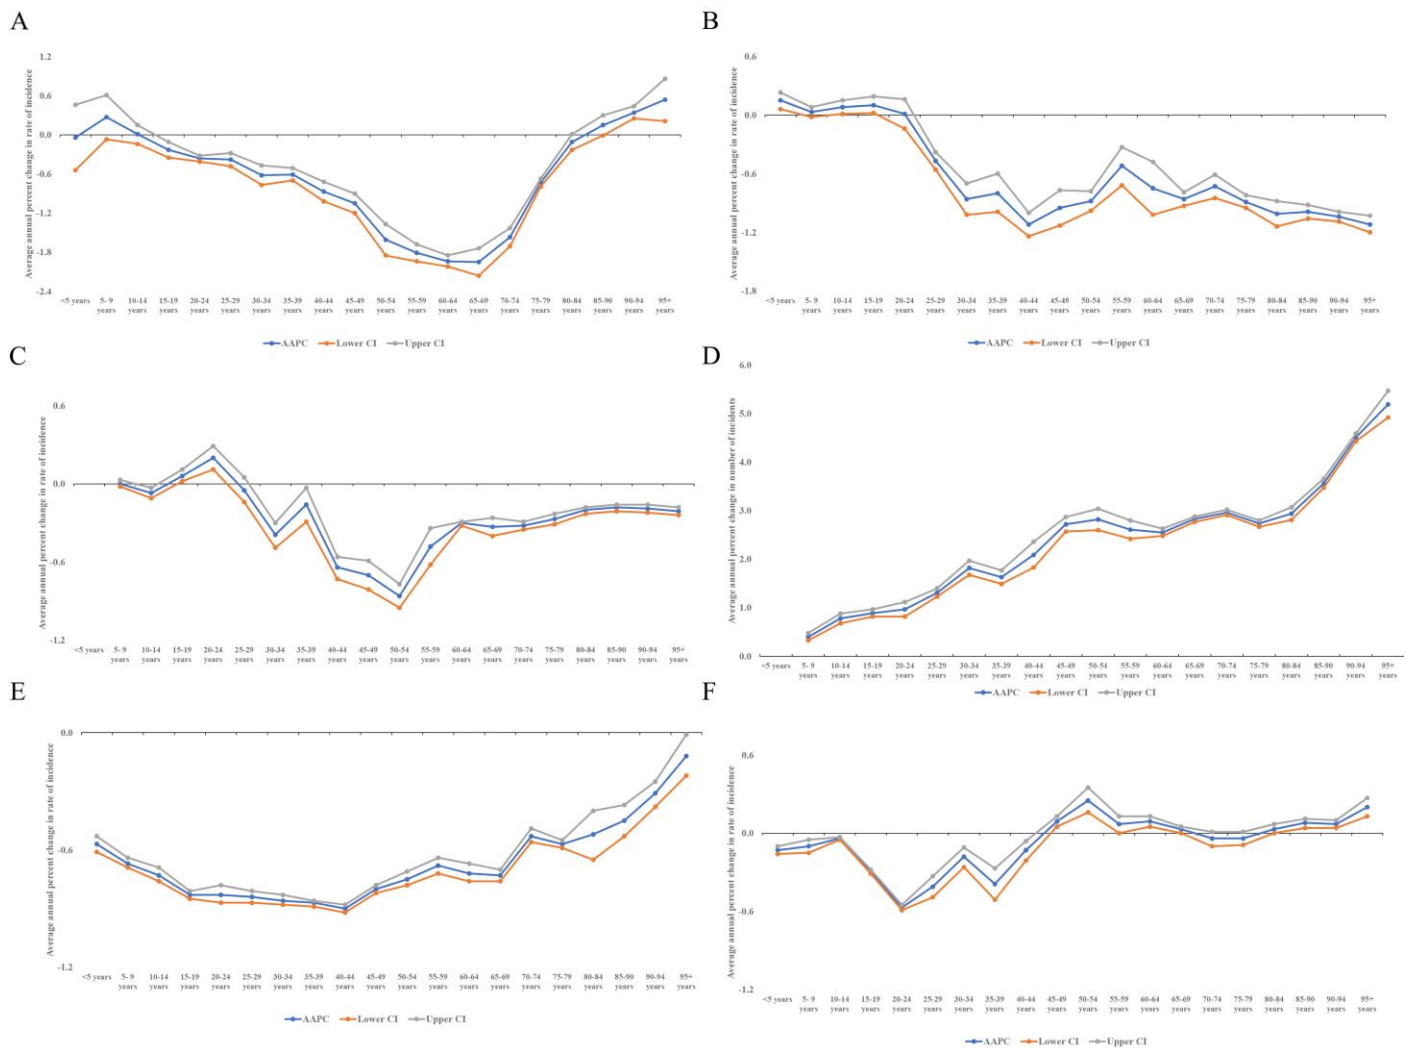

**sFigure 4.** The average annual percent change in rate of incidence attributable to six immune mediated inflammatory diseases throughout human lifespan, 1990-2019

The average annual percent change in rate of incidence attributable to asthma throughout human lifespan, 1990-2019 (A),

The average annual percent change in rate of incidence attributable to inflammatory bowel disease throughout human lifespan, 1990-2019(B),

The average annual percent change in rate of incidence attributable to multiple sclerosis throughout human lifespan, 1990-2019(C),

The average annual percent change in rate of incidence attributable to rheumatoid arthritis throughout human lifespan, 1990-2019 (D),

The average annual percent change in rate of incidence attributable to psoriasis throughout human lifespan, 1990-2019(E),

The average annual percent change in rate of incidence attributable to atopic dermatitis throughout human lifespan, 1990-2019 (F),

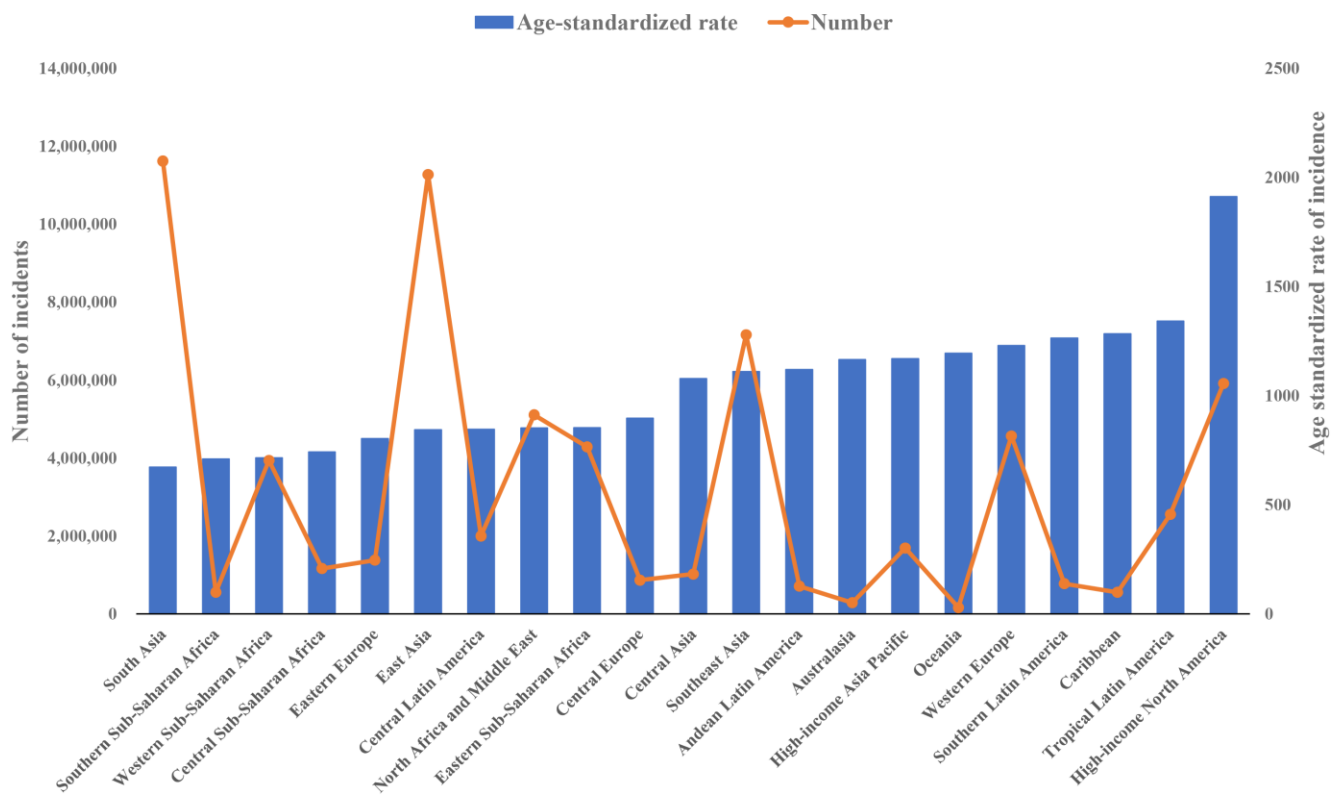

**sFigure 5.** The incident cases and age-standardized rate of incidence attributable to overall immune mediated inflammatory diseases according to GBD regions in 2019

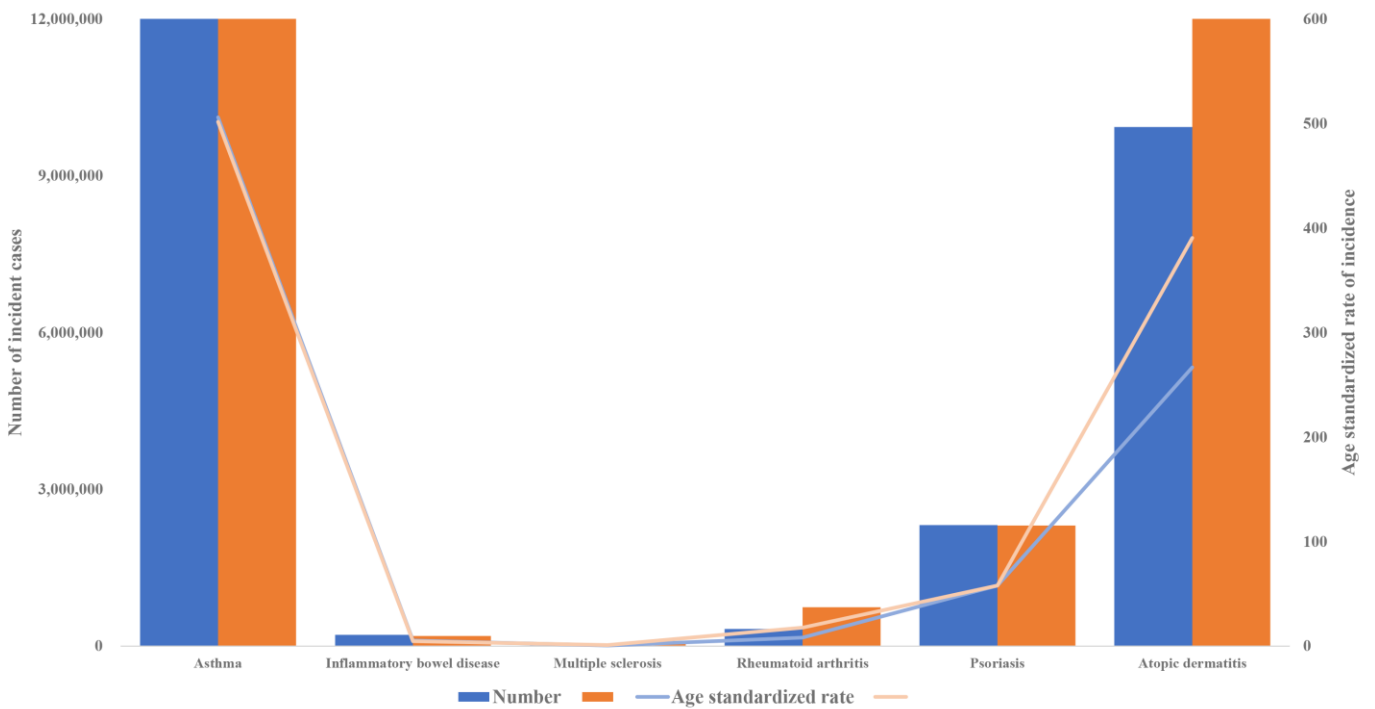

**sFigure 6.** The incident cases and age-standardized rate of incidence attributable to overall immune mediated inflammatory diseases according to gender in 2019

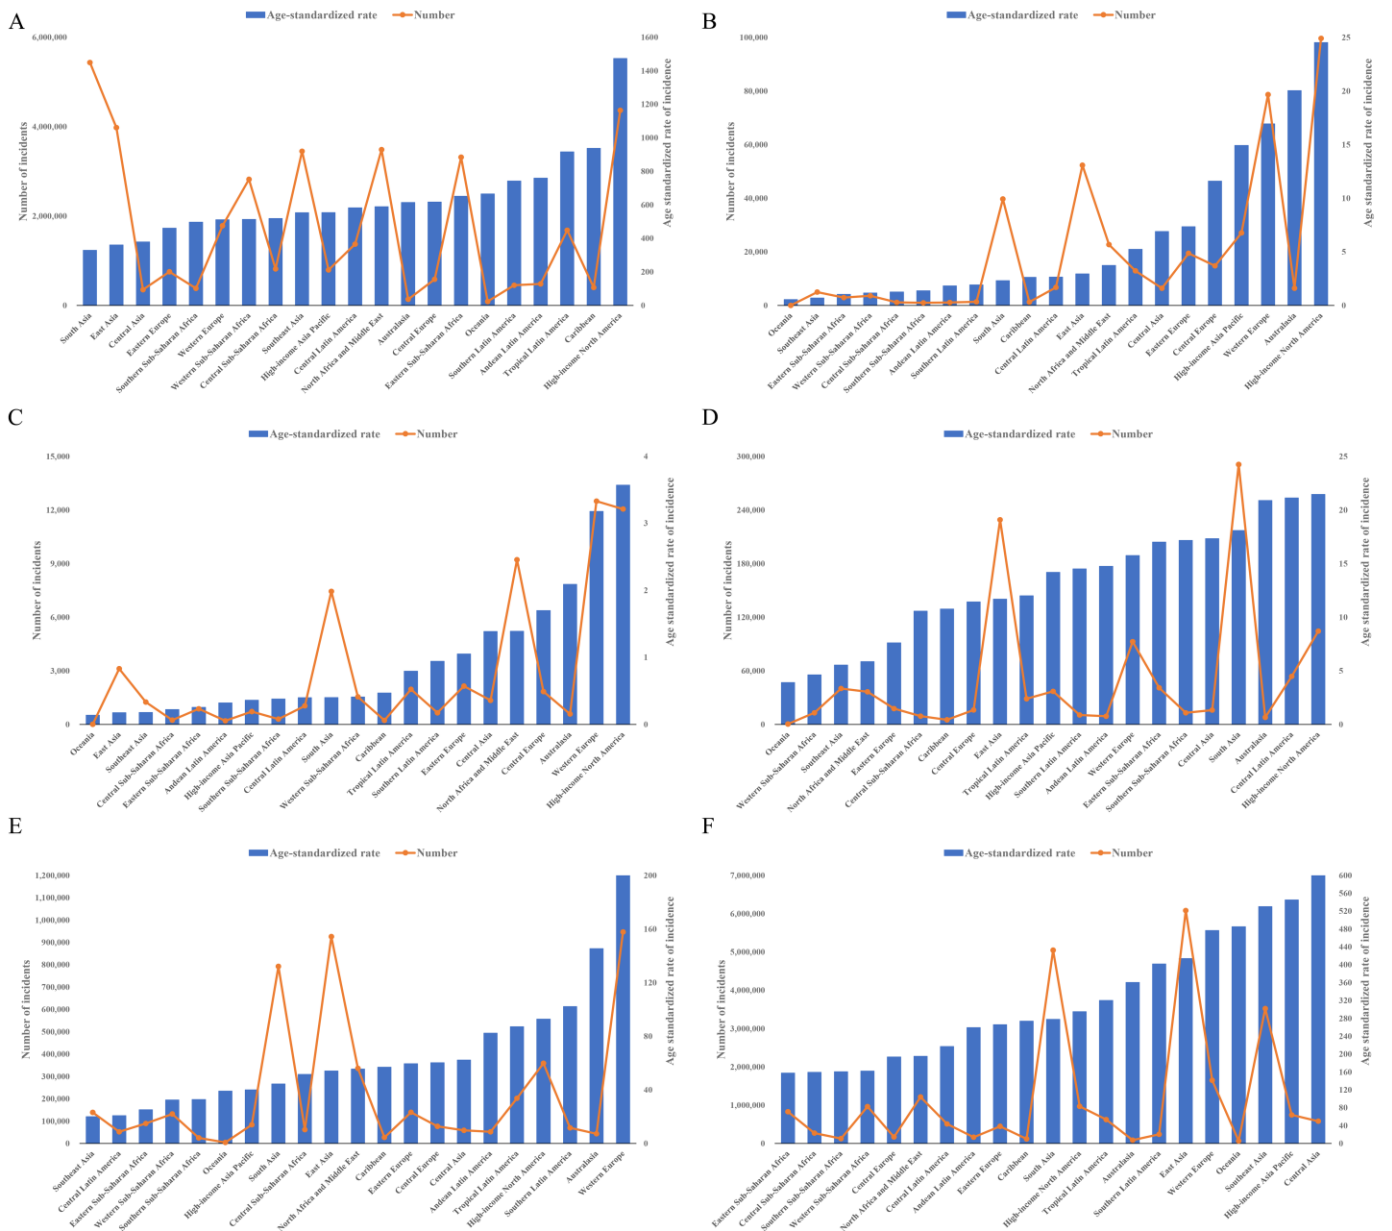

**Figure 7.** The incident cases and age-standardized rate of incidence attributable to six immune mediated inflammatory diseases according to GBD regions in 2019

The incident cases and age-standardized rate of incidence attributable to asthma according to GBD regions(A),  
 The incident cases and age-standardized rate of incidence attributable to inflammatory bowel disease according to GBD regions (B),  
 The incident cases and age-standardized rate of incidence attributable to multiple sclerosis according to GBD regions (C),  
 The incident cases and age-standardized rate of incidence attributable to rheumatoid arthritis according to GBD regions (D),  
 The incident cases and age-standardized rate of incidence attributable to psoriasis according to GBD regions (E),  
 The incident cases and age-standardized rate of incidence attributable to atopic dermatitis according to GBD regions (F).

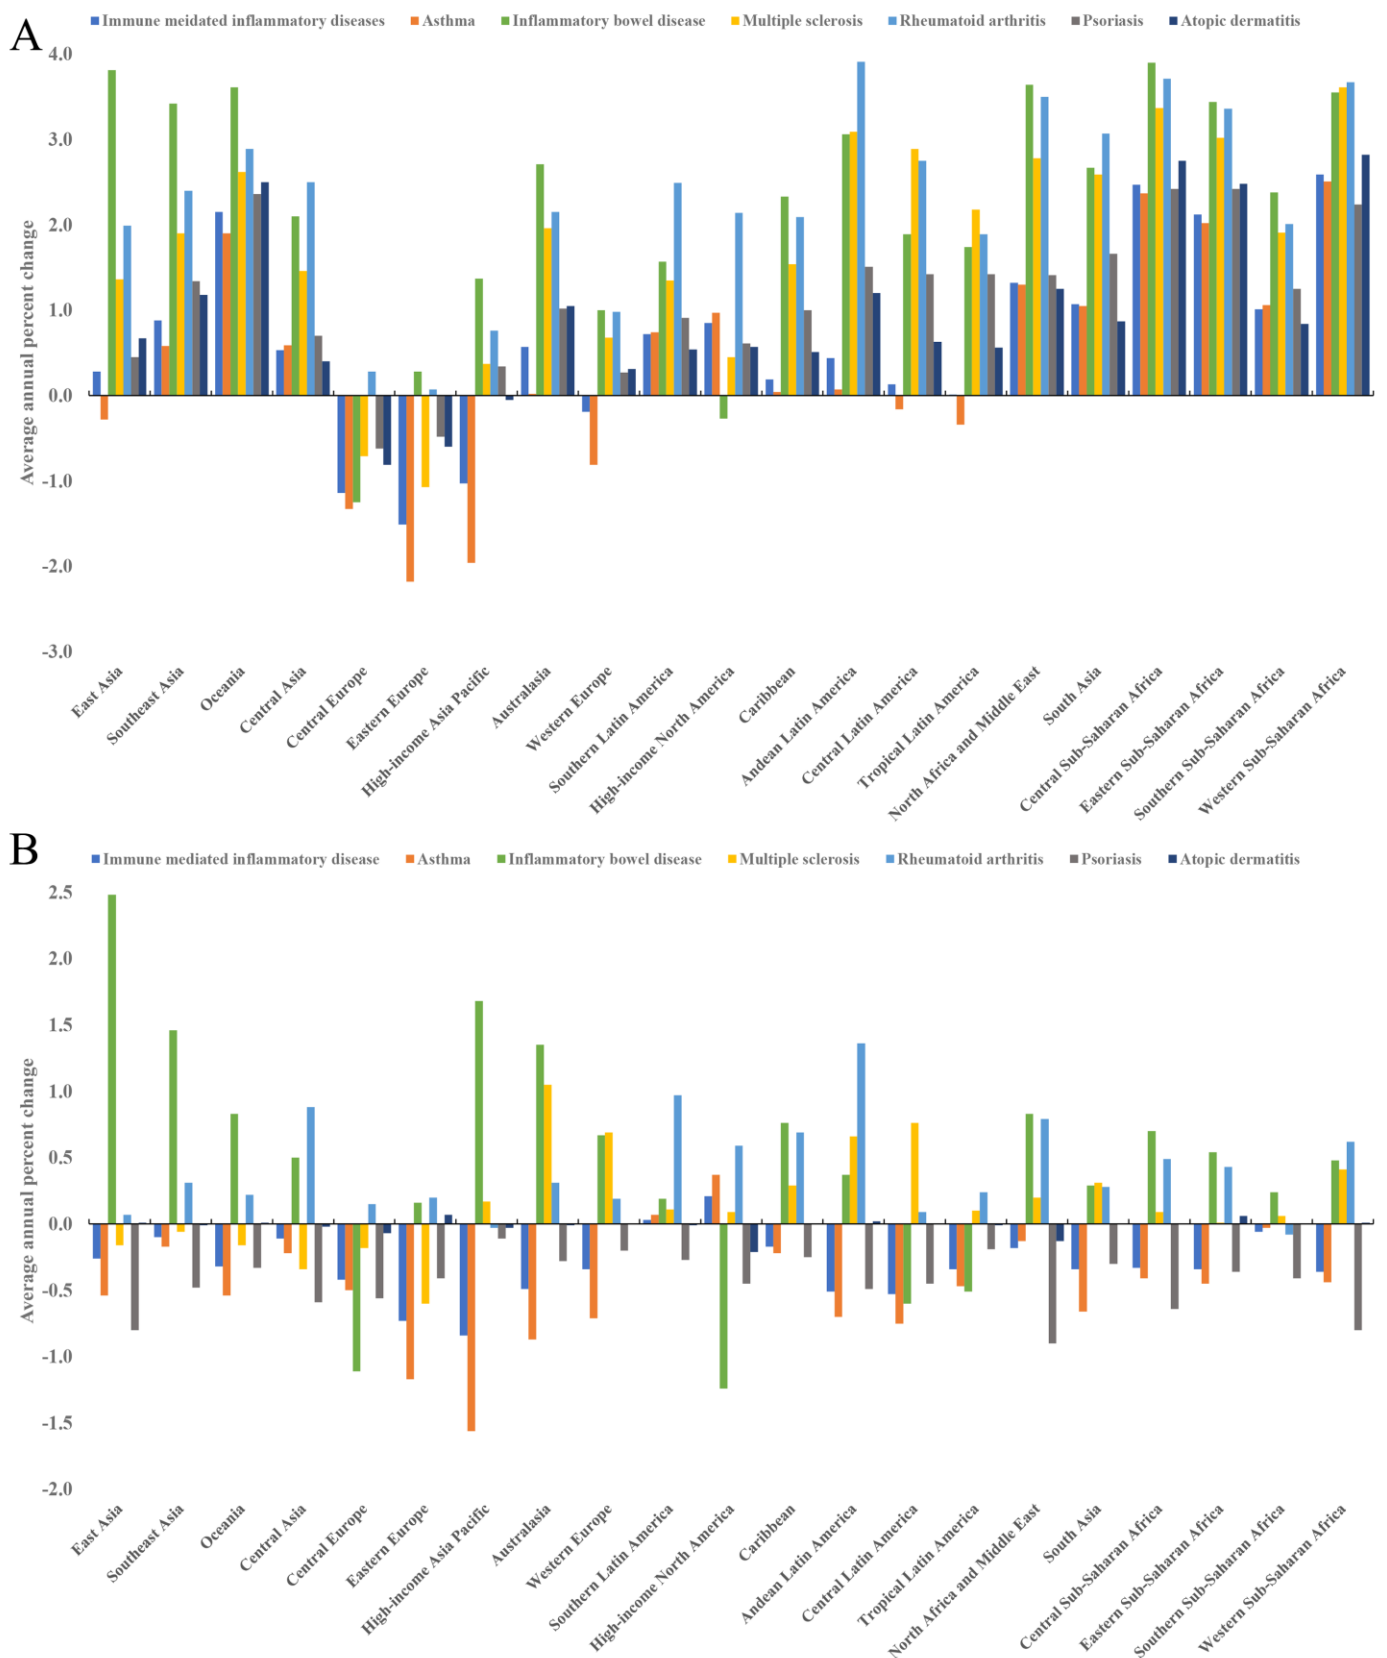

**sFigure 8.** The average annual percent change in number of incidents and age standardized rate of incidence attributable to six immune mediated inflammatory diseases across 21 GBD regions, 1990-2019

The average annual percent change in number of incidents attributable to six immune mediated inflammatory diseases across 21 GBD regions, 1990-2019 (A)

The average annual percent change in age standardized rate of incidence attributable to six immune mediated inflammatory diseases across 21 GBD regions, 1990-2019 (B)

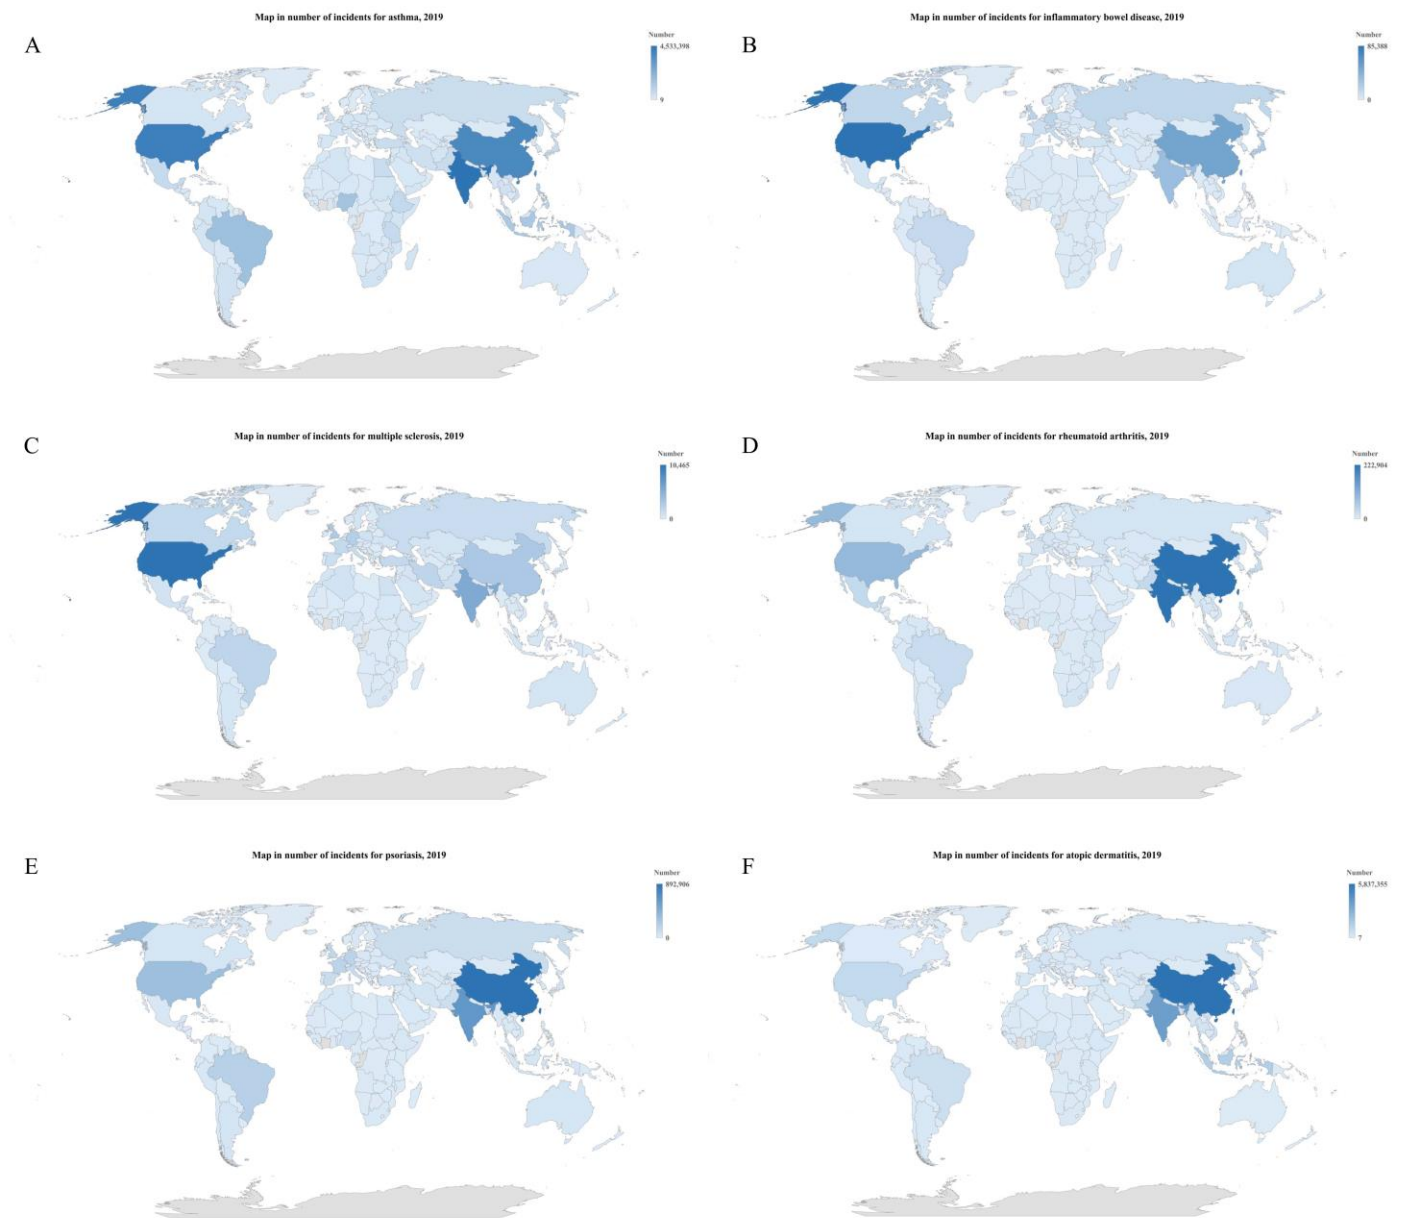

**sFigure 9.** The global map in number of incidents attributable to six immune mediated inflammatory diseases in 204 countries and territories, 2019

The global map in number of incident cases attributable to asthma, 2019 (A),

The global map in number of incident cases attributable to inflammatory bowel disease, 2019 (B),

The global map in number of incident cases attributable to multiple sclerosis, 2019 (C),

The global map in number of incident cases attributable to rheumatoid arthritis, 2019 (D),

The global map in number of incident cases attributable to psoriasis, 2019 (E),

The global map in number of incident cases attributable to atopic dermatitis, 2019 (F).



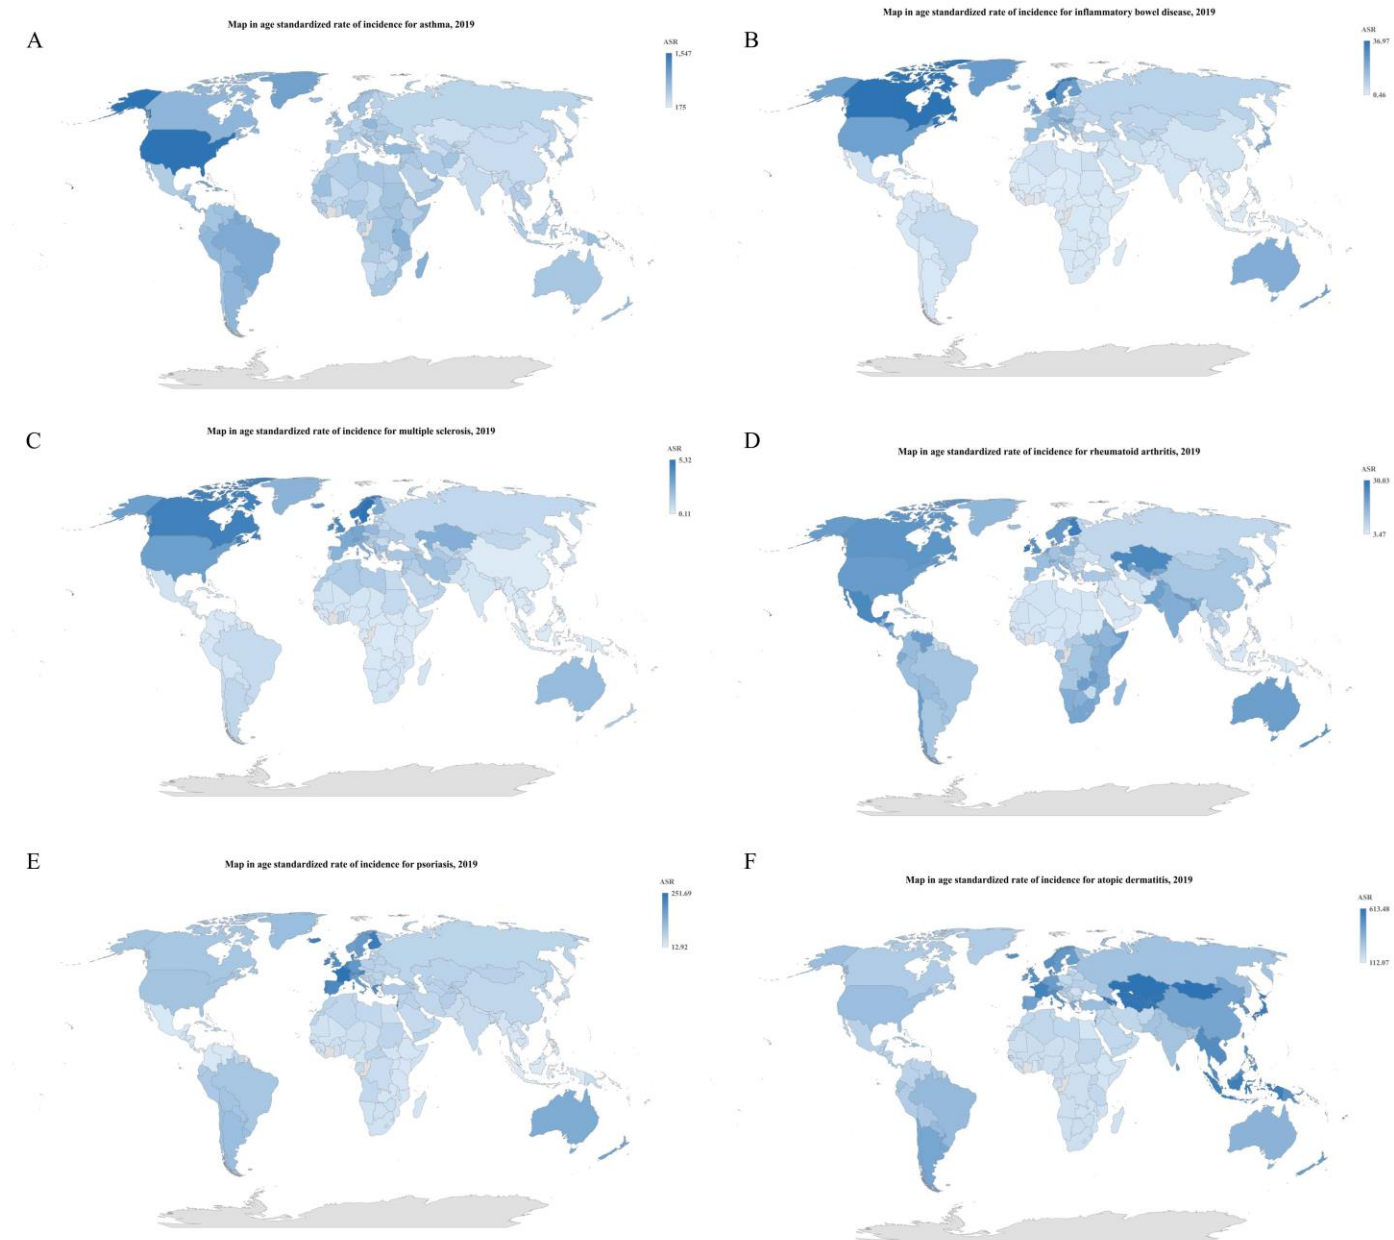

**Figure 10.** The global map in age standardized rate of incidence attributable to six immune mediated inflammatory diseases in 204 countries and territories, 2019

The global map in age standardized rate of incidence attributable to asthma, 2019 (A),

The global map in age standardized rate of incidence attributable to inflammatory bowel disease, 2019 (B),

The global map in age standardized rate of incidence attributable to multiple sclerosis, 2019 (C),

The global map in age standardized rate of incidence attributable to rheumatoid arthritis, 2019 (D),

The global map in age standardized rate of incidence attributable to psoriasis, 2019 (E),

The global map in age standardized rate of incidence attributable to atopic dermatitis, 2019 (F).



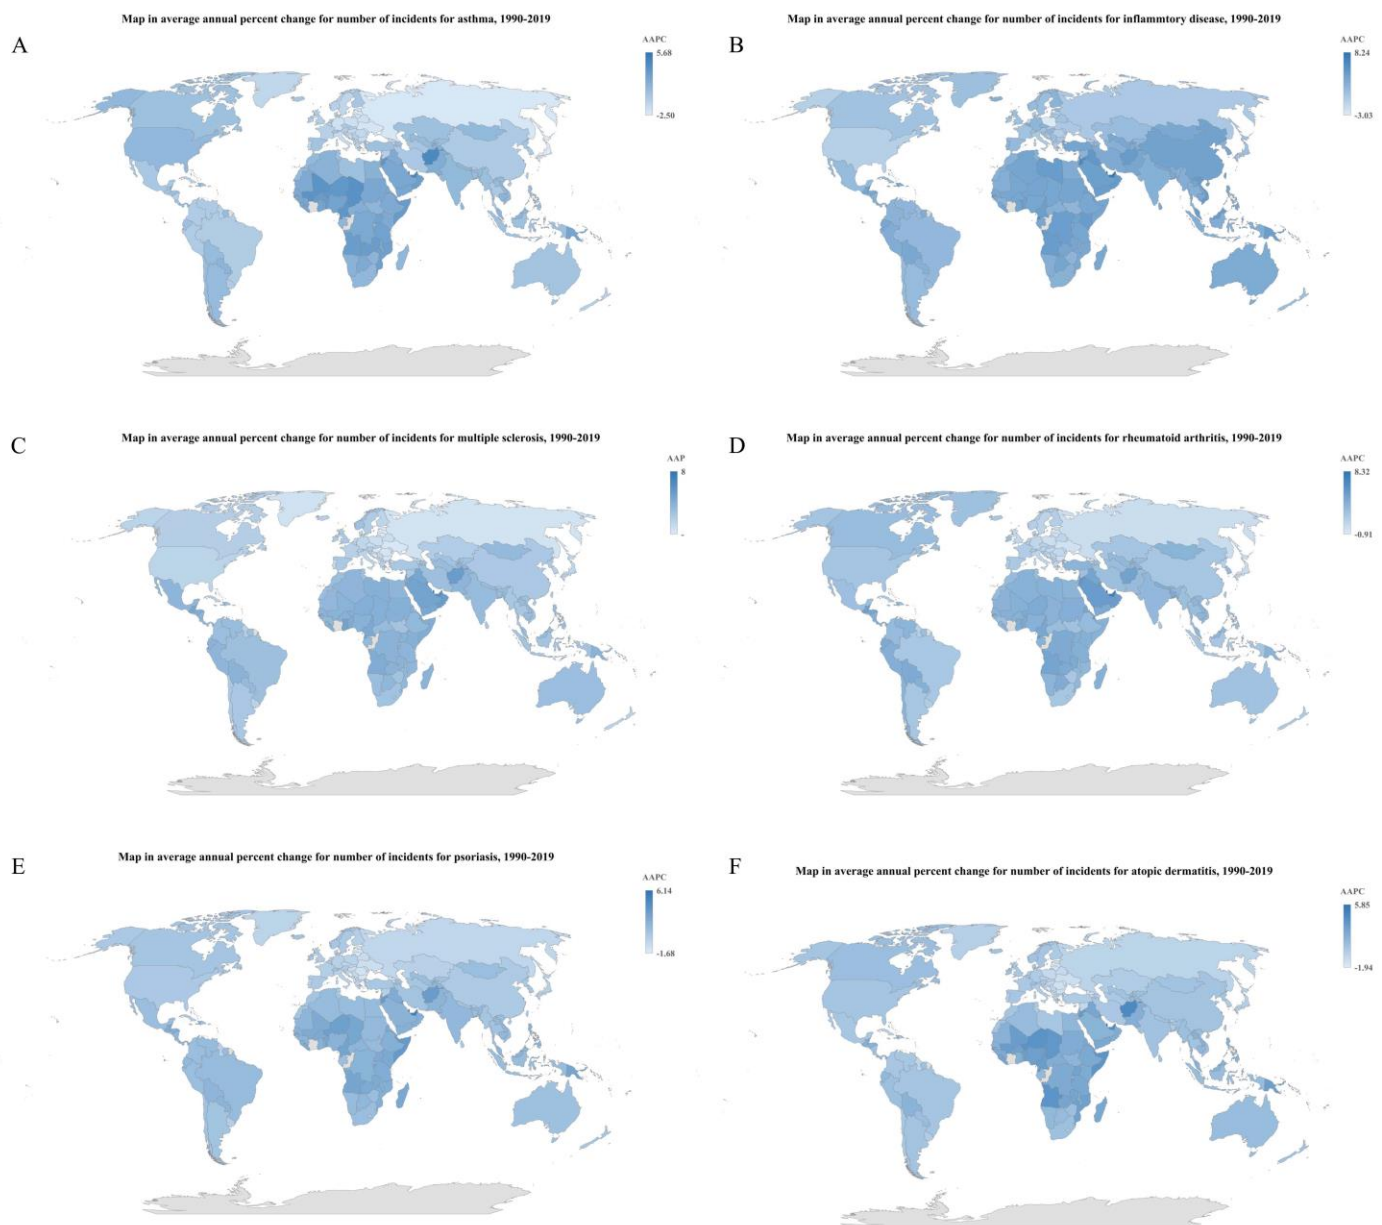

**Figure 11.** The global map in average annual percent change in number of incidence attributable to six immune mediated inflammatory diseases in 204 countries and territories, 1990-2019

The global map in average annual percent change in number of incident cases attributable to asthma, 1990-2019 (A),

The global map in average annual percent change in number of incident cases attributable to inflammatory bowel disease, 1990-2019 (B),

The global map in average annual percent change in number of incident cases attributable to multiple sclerosis, 1990-2019 (C),

The global map in average annual percent change in number of incident cases attributable to rheumatoid arthritis, 1990-2019 (D),

The global map in average annual percent change in number of incident cases attributable to psoriasis, 1990-2019 (E),

The global map in average annual percent change in number of incident cases attributable to atopic dermatitis, 1990-2019 (F).

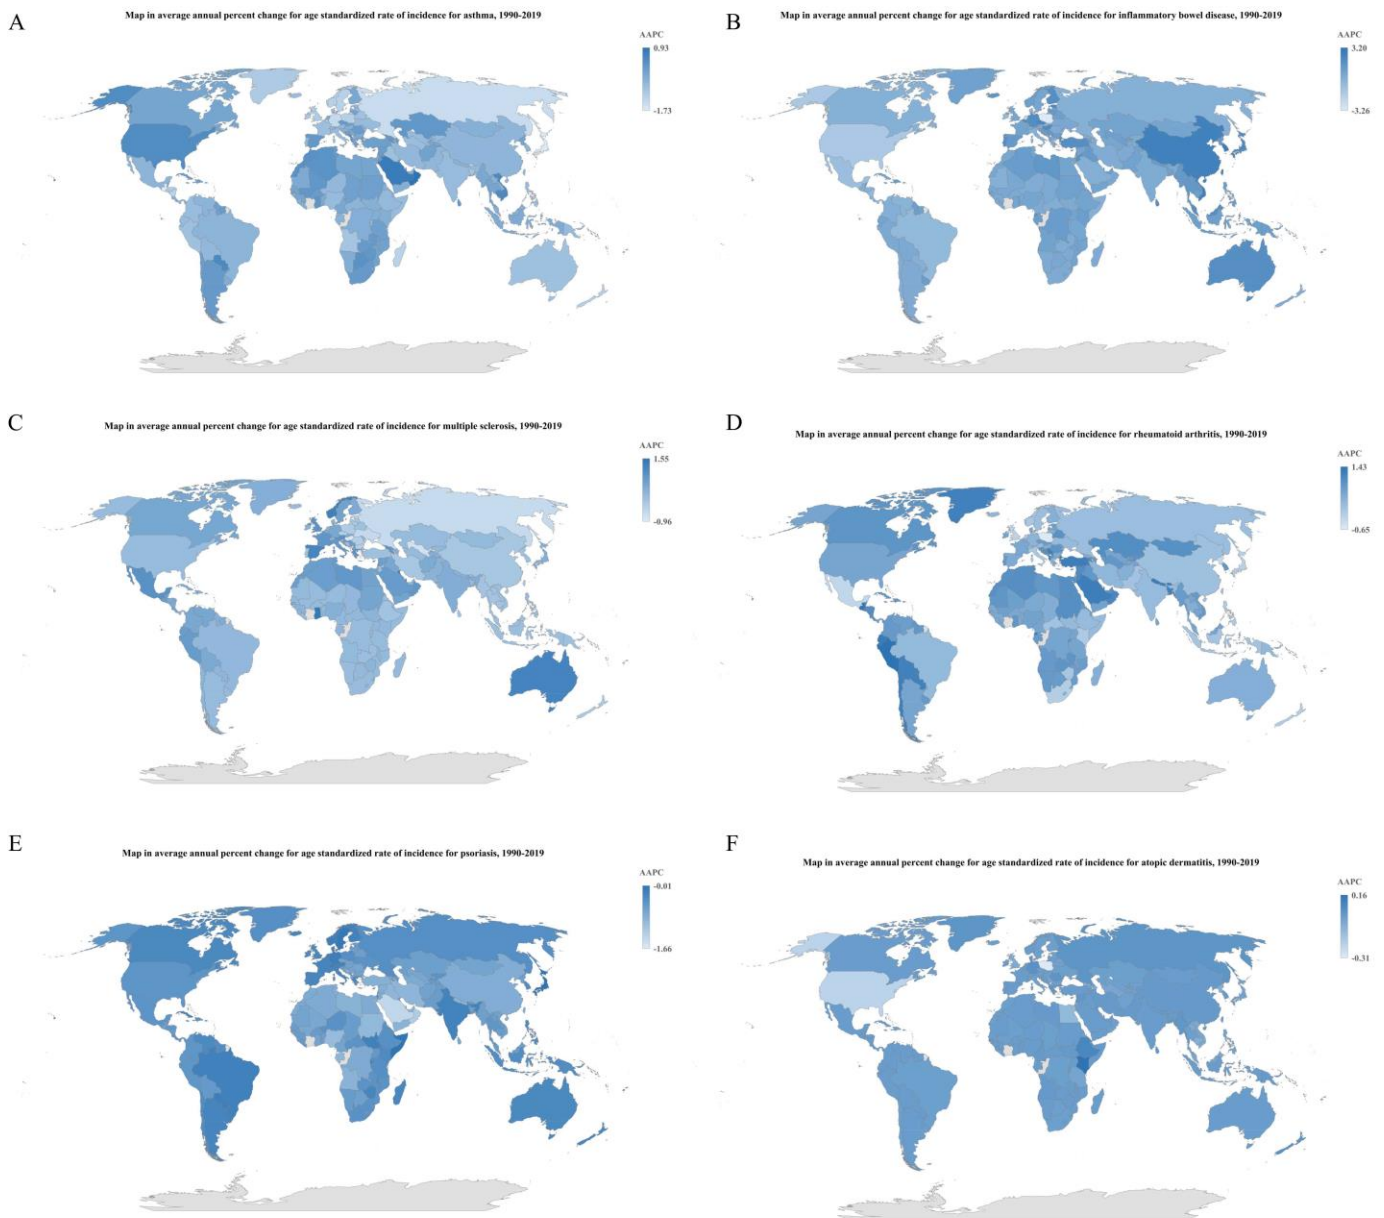

**Figure 12.** The global map in average annual percent change in age standardized rate of incidence attributable to six immune mediated inflammatory diseases in 204 countries and territories, 1990-2019

The global map in average annual percent change in age standardized rate of incidence attributable to asthma, 1990-2019 (A),  
 The global map in average annual percent change in age standardized rate of incidence attributable to inflammatory bowel disease, 1990-2019 (B),  
 The global map in average annual percent change in age standardized rate of incidence attributable to multiple sclerosis, 1990-2019 (C),  
 The global map in average annual percent change in age standardized rate of incidence attributable to rheumatoid arthritis, 1990-2019 (D),  
 The global map in average annual percent change in age standardized rate of incidence attributable to psoriasis, 1990-2019 (E),  
 The global map in average annual percent change in age standardized rate of incidence attributable to atopic dermatitis, 1990-2019 (F).

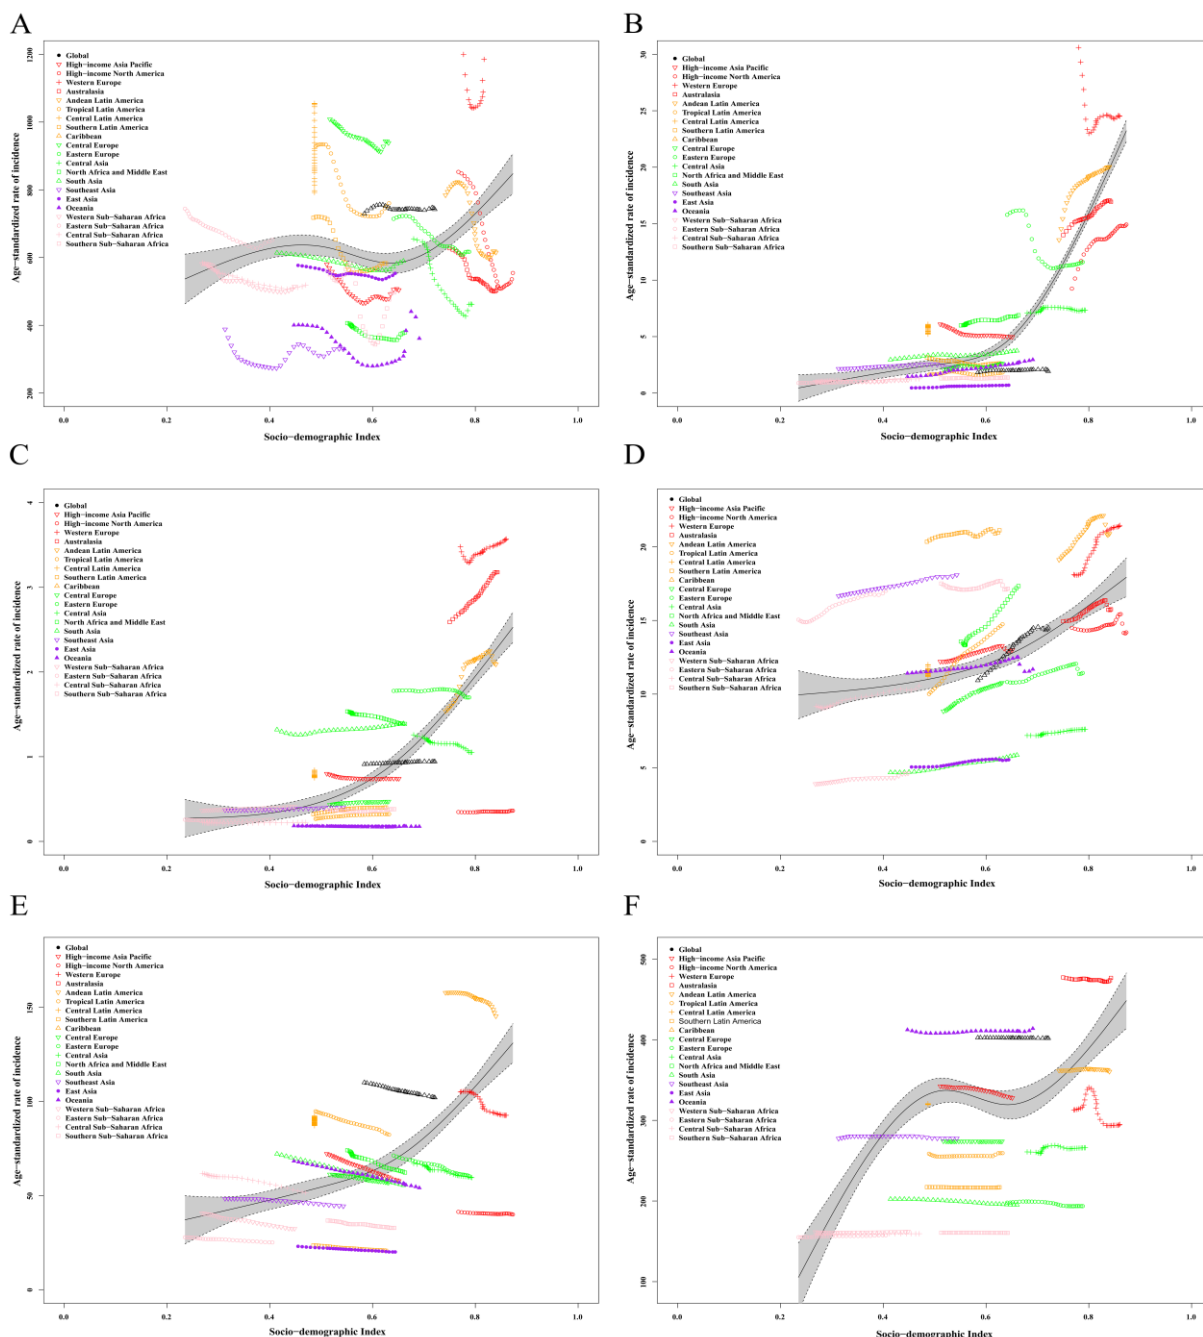

**Figure 13.** Age standardized rate of incidence attributable to six immune mediated inflammatory diseases per 100 000 persons for sociodemographic index by 21 GBD regions, 2019  
 Age standardized rate of incidence attributable to asthma per 100 000 persons for sociodemographic index by 21 GBD regions, 2019 (A), Age standardized rate of incidence attributable to inflammatory bowel disease per 100 000 persons for sociodemographic index by 21 GBD regions, 2019 (B), Age standardized rate of incidence attributable to multiple sclerosis per 100 000 persons for sociodemographic index by 21 GBD regions, 2019 (C), Age standardized rate of incidence attributable to rheumatoid arthritis per 100 000 persons for sociodemographic index by 21 GBD regions, 2019 (D), Age standardized rate of incidence attributable to psoriasis per 100 000 persons for sociodemographic index by 21 GBD regions, 2019 (E), Age standardized rate of incidence attributable to atopic dermatitis per 100 000 persons for sociodemographic index by 21 GBD regions, 2019 (F). Black line represents expected values based on sociodemographic index and disease rates across 21 Global Burden of Disease regions; each point shows observed age standardized rate of incidence for specified Global Burden of Disease region in 2019.

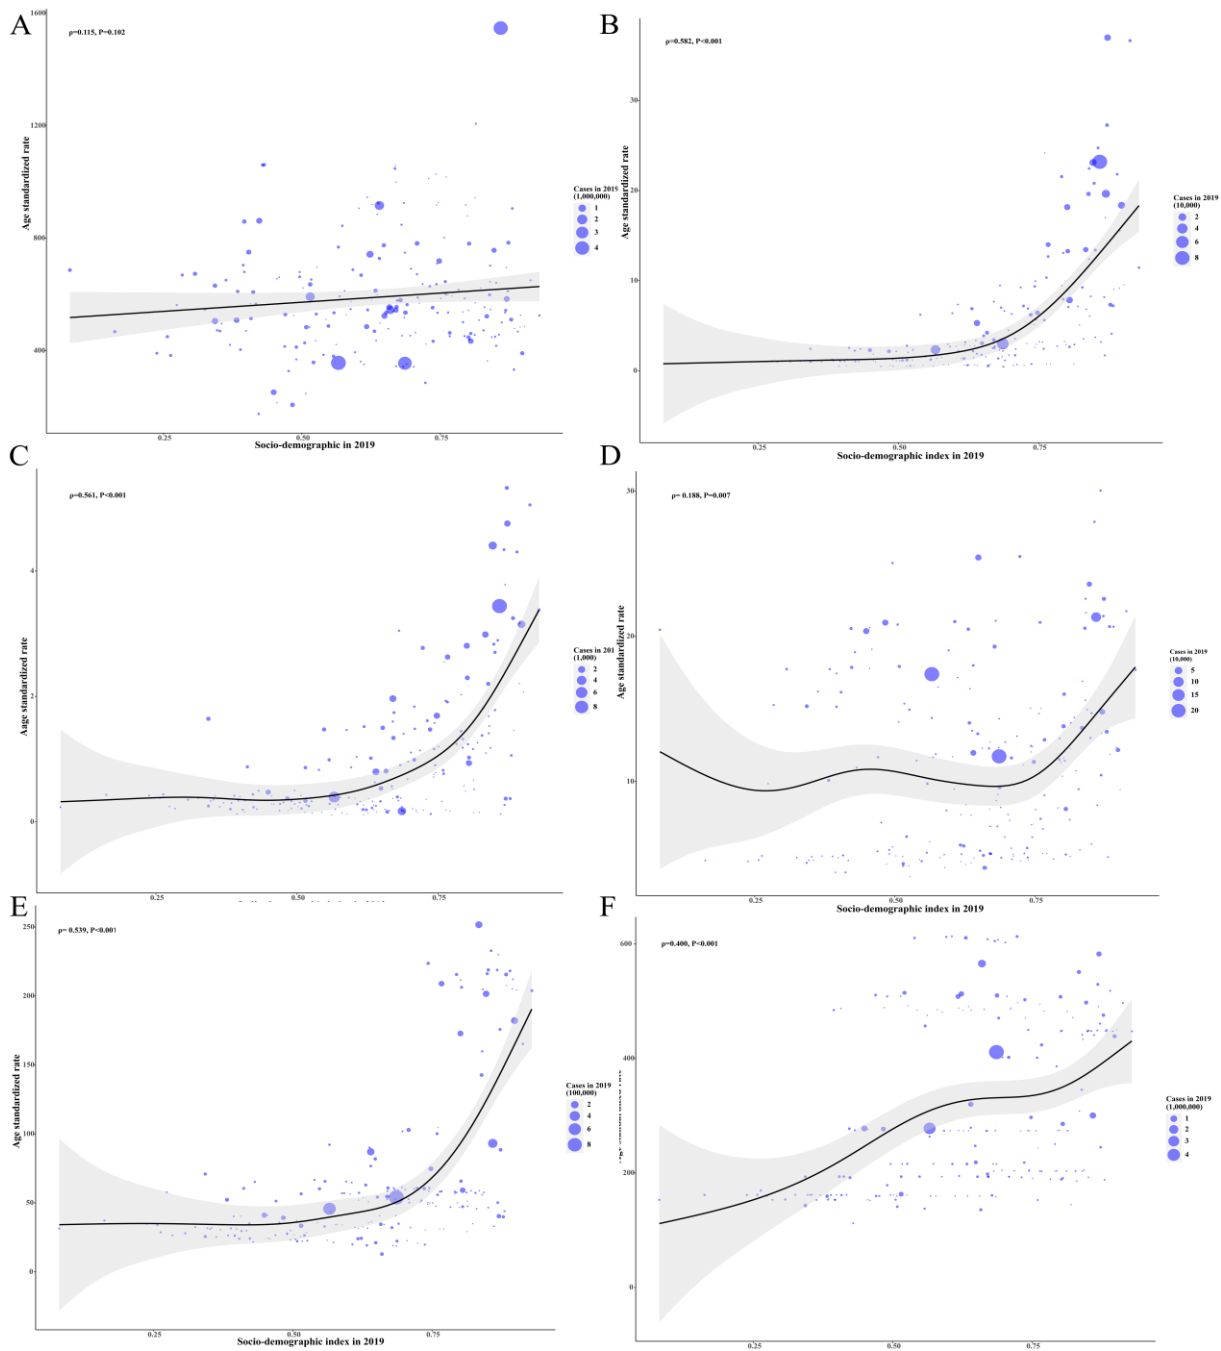

**sFigure 14.** Age standardized rate of incidence attributable to six immune mediated inflammatory diseases per 100 000 persons for sociodemographic index by 204 countries and territories, 2019

Age standardized rate of incidence attributable to asthma per 100 000 persons for sociodemographic index by 204 countries and territories, 2019 (A), Age standardized rate of incidence attributable to inflammatory bowel disease per 100 000 persons for sociodemographic index by 204 countries and territories, 2019 (B), Age standardized rate of incidence attributable to multiple sclerosis per 100 000 persons for sociodemographic index by 204 countries and territories, 2019 (C), Age standardized rate of incidence attributable to rheumatoid arthritis per 100 000 persons for sociodemographic index by 204 countries and territories, 2019 (D), Age standardized rate of incidence attributable to psoriasis per 100 000 persons for sociodemographic index by 204 countries and territories, 2019 (E), Age standardized rate of incidence attributable to atopic dermatitis per 100 000 persons for sociodemographic index by 204 countries and territories, 2019 (F), Black line represents expected values based on sociodemographic index and disease across 204 countries and territories, each point shows observed age standardized rate of incidence for specified country in 2019.



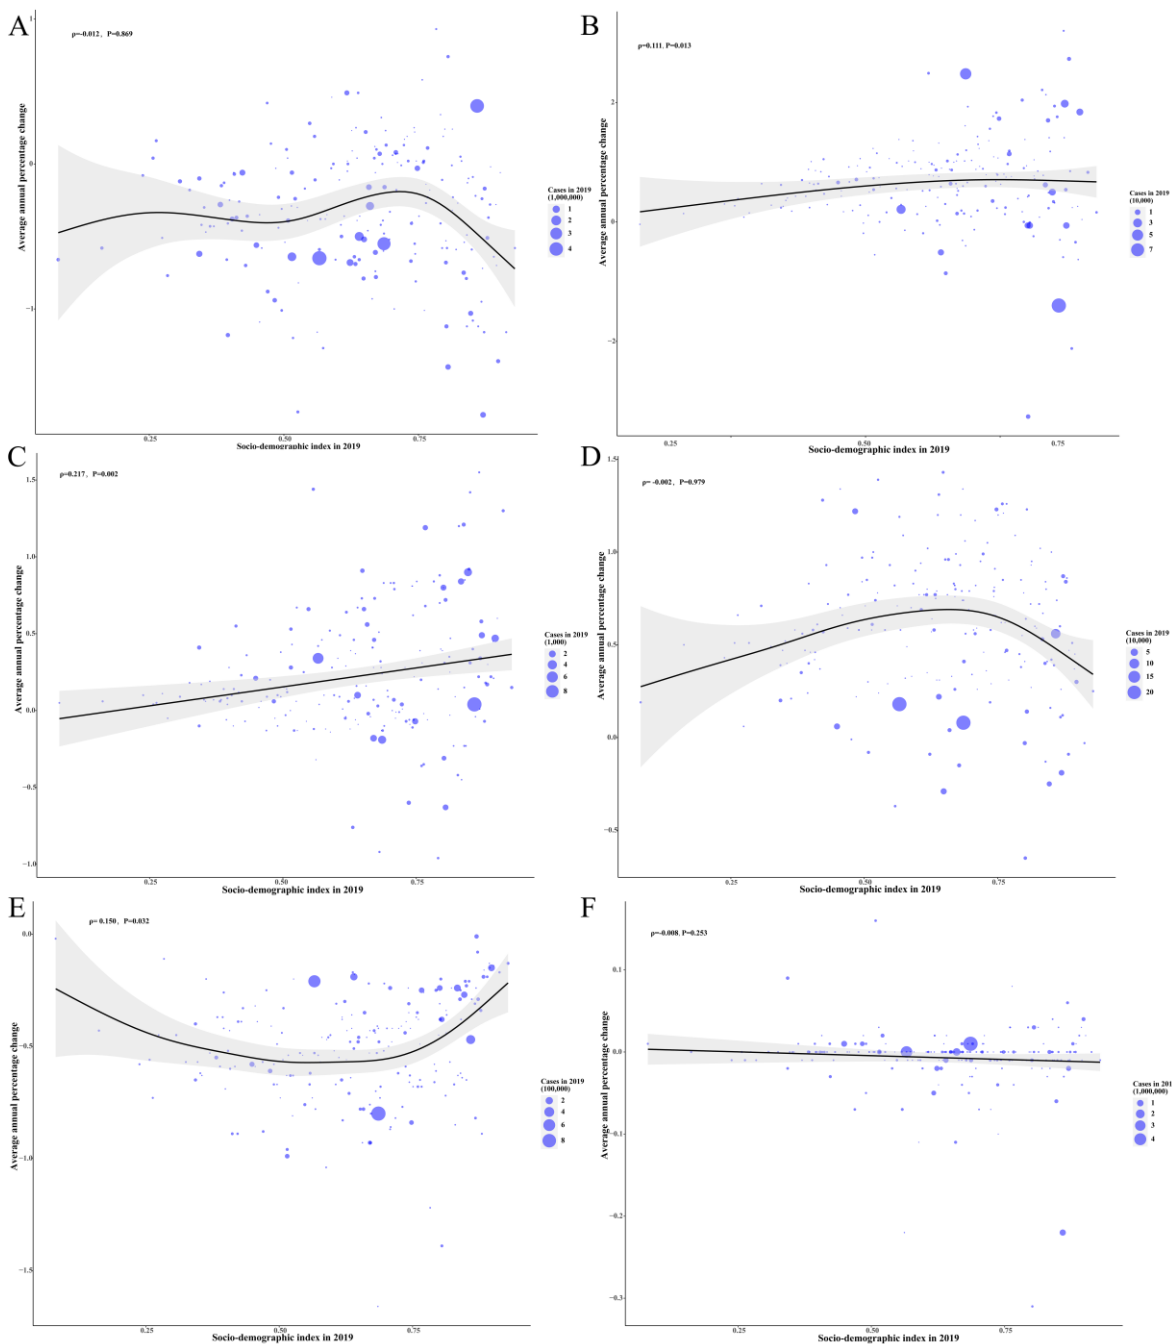

**sFigure 15.** The correlation between average annual percent change and age standardized rate of incidence attributable to six immune mediated inflammatory in 1990 across 204 countries and territories

The correlation between average annual percent change and age standardized rate of incidence attributable to asthma in 1990 across 204 countries and territories (A), The correlation between average annual percent change and age standardized rate of incidence attributable to inflammatory bowel disease in 1990 across 204 countries and territories (B), The correlation between average annual percent change and age standardized rate of incidence attributable to multiple sclerosis in 1990 across 204 countries and territories (C), The correlation between average annual percent change and age standardized rate of incidence attributable to rheumatoid arthritis in 1990 across 204 countries and territories (D), The correlation between average annual percent change and age standardized rate of incidence attributable to psoriasis in 1990 across 204 countries and territories (E), The correlation between average annual percent change and age standardized rate of incidence attributable to atopic dermatitis in 1990 across 204 countries and territories (F). The size of circle is increased with the incident cases of immune mediated inflammatory diseases. The  $\rho$  indices and p values were derived from Pearson correlation analysis.

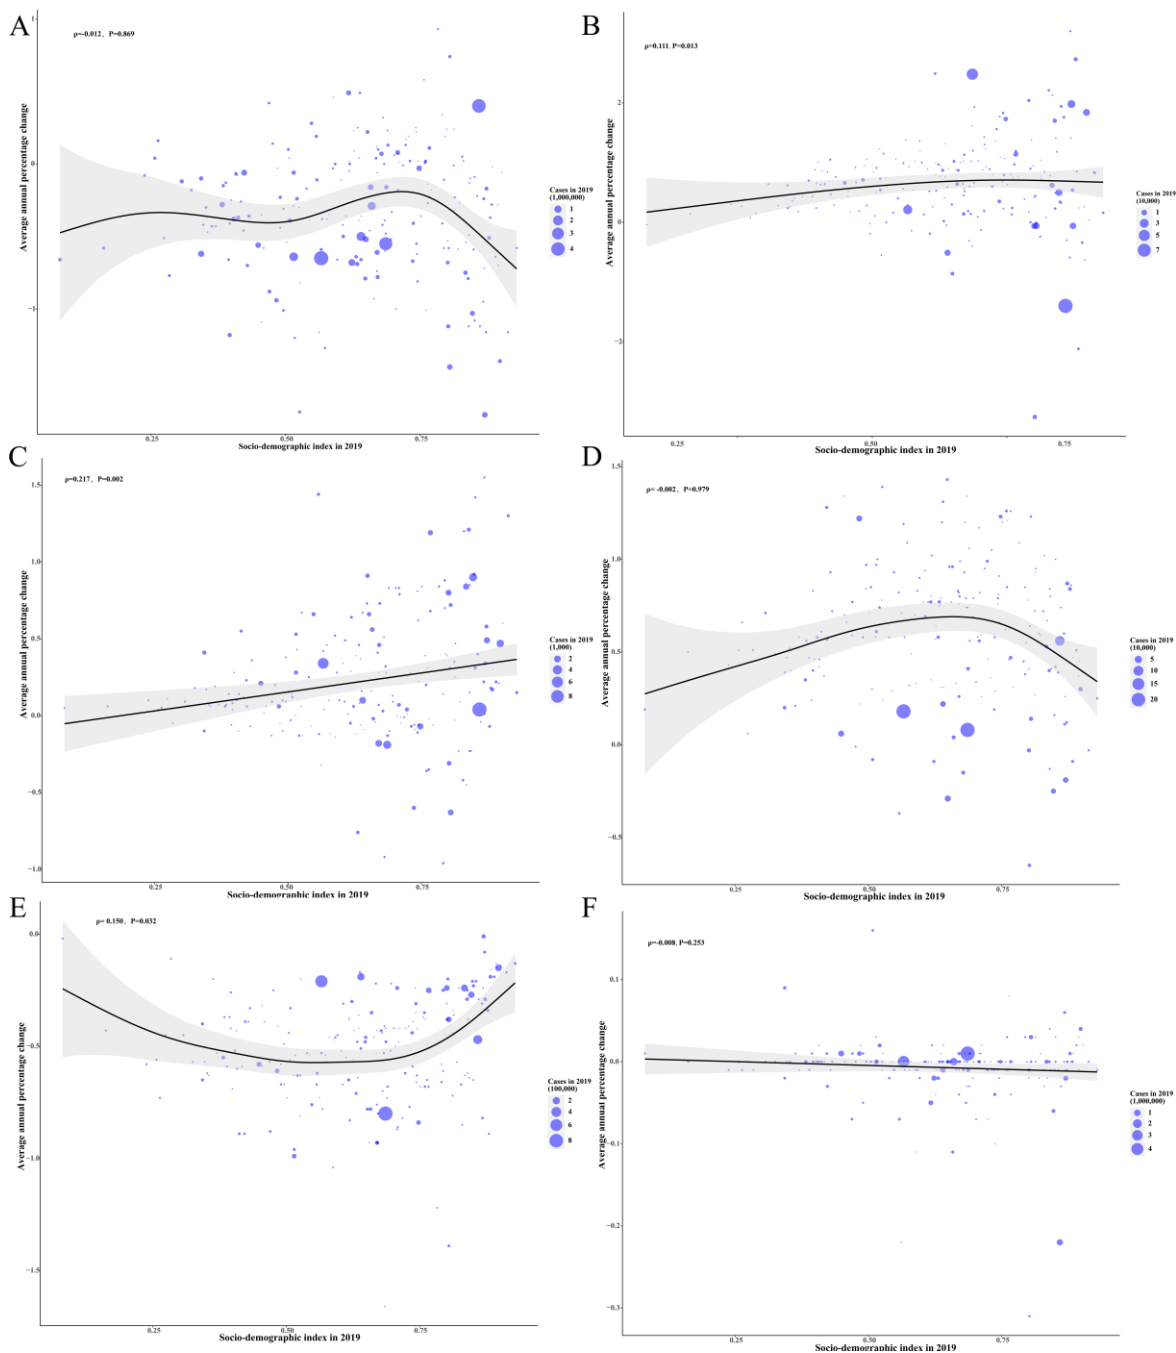

**Figure 16.** The correlation between average annual percent change and socio-demographic index attributable to six immune mediated inflammatory in 2019 across 204 countries and territories

The correlation between average annual percent change and socio-demographic index attributable to asthma in 2019 across 204 countries and territories (A), The correlation between average annual percent change and socio-demographic index attributable to inflammatory bowel disease in 2019 across 204 countries and territories (B), The correlation between average annual percent change and socio-demographic index attributable to multiple sclerosis in 2019 across 204 countries and territories (C), The correlation between average annual percent change and socio-demographic index attributable to rheumatoid arthritis in 2019 across 204 countries and territories (D), The correlation between average annual percent change and socio-demographic index attributable to psoriasis in 2019 across 204 countries and territories (E), The correlation between average annual percent change and socio-demographic index attributable to atopic dermatitis in 2019 across 204 countries and territories (F). The size of circle is increased with the incident cases of immune mediated inflammatory diseases. The  $\rho$  indices and p values were derived from Pearson correlation analysis.



**sTable 1.** The incident cases and rate of incidence attributable to overall immune mediated inflammatory diseases across 20 age groups, and its temporal trends from 1990 to 2019

|               | 1990                              |      | 2019                              |      | 1990-1999          |                    | 2000-2009          |                    | 2010-2019   |             | 1990-2019 |    |
|---------------|-----------------------------------|------|-----------------------------------|------|--------------------|--------------------|--------------------|--------------------|-------------|-------------|-----------|----|
|               | N(95%CI)                          | Rank | N(95%CI)                          | Rank | AAPC(95%CI)        | AAPC(95%CI)        | AAPC(95%CI)        | AAPC(95%CI)        | AAPC(95%CI) | AAPC(95%CI) | Rank      |    |
| <b>Rate</b>   |                                   |      |                                   |      |                    |                    |                    |                    |             |             |           |    |
| <5 years      | 2,636.03(1,951.96-3,566.38)       | 1    | 2,496.39(1,842.16-3,392.48)       | 1    | -0.95(-1.08,-0.82) | 0.28(-0.14,0.69)   | 0.32(-0.45,1.09)   | -0.08(-0.38,0.21)  |             |             |           | 6  |
| 5- 9 years    | 1,448.88(909.32-2,177.48)         | 2    | 1,461.23(914.22-2,212.18)         | 2    | -0.80(-0.98,-0.62) | 0.66(0.46,0.86)    | 0.57(-0.32,1.46)   | 0.13(-0.16,0.42)   |             |             |           | 3  |
| 10-14 years   | 906.48(534.82-1,313.47)           | 10   | 898.33(527.74-1,301.27)           | 6    | -0.53(-0.64,-0.42) | -0.24(-0.27,-0.20) | 0.71(0.51,0.91)    | -0.03(-0.11,0.04)  |             |             |           | 5  |
| 15-19 years   | 722.89(500.98-997.29)             | 14   | 662.82(454.87-915.71)             | 13   | -0.33(-0.40,-0.25) | -0.77(-0.86,-0.67) | 0.24(0.02,0.47)    | -0.28(-0.36,-0.20) |             |             |           | 8  |
| 20-24 years   | 640.33(430.92-913.63)             | 16   | 557.52(368.91-803.26)             | 16   | -0.47(-0.48,-0.45) | -0.71(-0.73,-0.69) | -0.25(-0.28,-0.23) | -0.47(-0.49,-0.46) |             |             |           | 12 |
| 25-29 years   | 582.97(419.45-771.75)             | 19   | 510.74(367.34-674.87)             | 18   | -0.61(-0.63,-0.58) | -0.67(-0.69,-0.65) | -0.06(-0.09,-0.03) | -0.46(-0.48,-0.44) |             |             |           | 11 |
| 30-34 years   | 553.88(391.80-745.40)             | 20   | 486.38(347.28-650.25)             | 20   | -0.64(-0.68,-0.61) | -0.72(-0.74,-0.70) | 0.07(0.03,0.12)    | -0.44(-0.46,-0.42) |             |             |           | 9  |
| 35-39 years   | 583.69(401.26-826.28)             | 18   | 500.43(348.52-705.93)             | 19   | -0.92(-0.96,-0.89) | -0.68(-0.71,-0.65) | 0.01(-0.05,0.06)   | -0.53(-0.56,-0.51) |             |             |           | 13 |
| 40-44 years   | 623.90(432.86-871.95)             | 17   | 526.34(370.58-723.97)             | 17   | -1.04(-1.08,-1.00) | -0.70(-0.76,-0.64) | -0.02(-0.16,0.12)  | -0.60(-0.65,-0.55) |             |             |           | 15 |
| 45-49 years   | 657.27(423.46-959.41)             | 15   | 557.82(374.24-791.22)             | 15   | -0.87(-1.01,-0.74) | -0.71(-0.77,-0.64) | -0.05(-0.12,0.01)  | -0.59(-0.64,-0.53) |             |             |           | 14 |
| 50-54 years   | 799.40(561.86-1,086.71)           | 13   | 640.85(458.32-860.75)             | 14   | -1.34(-1.38,-1.31) | -0.86(-0.99,-0.74) | -0.10(-0.19,0.00)  | -0.77(-0.83,-0.72) |             |             |           | 16 |
| 55-59 years   | 1,002.69(649.36-1,425.19)         | 8    | 741.83(505.84-1,031.77)           | 12   | -2.02(-2.08,-1.95) | -0.92(-1.03,-0.81) | -0.06(-0.18,0.05)  | -1.02(-1.07,-0.96) |             |             |           | 18 |
| 60-64 years   | 1,141.76(791.12-1,531.91)         | 4    | 810.02(573.09-1,086.87)           | 9    | -2.24(-2.30,-2.18) | -1.04(-1.17,-0.91) | -0.14(-0.31,0.04)  | -1.16(-1.23,-1.09) |             |             |           | 19 |
| 65-69 years   | 1,221.90(856.82-1,775.40)         | 3    | 864.56(615.60-1,234.48)           | 7    | -2.03(-2.06,-2.00) | -1.23(-1.27,-1.19) | -0.31(-0.52,-0.11) | -1.19(-1.26,-1.12) |             |             |           | 20 |
| 70-74 years   | 1,135.73(749.16-1,667.56)         | 5    | 862.61(598.05-1,216.89)           | 8    | -1.54(-1.69,-1.39) | -1.22(-1.37,-1.07) | -0.14(-0.22,-0.06) | -0.97(-1.05,-0.89) |             |             |           | 17 |
| 75-79 years   | 901.02(652.56-1,195.10)           | 11   | 794.52(583.33-1,047.14)           | 11   | -0.53(-0.59,-0.47) | -0.74(-0.77,-0.70) | -0.02(-0.14,0.10)  | -0.45(-0.49,-0.40) |             |             |           | 10 |
| 80-84 years   | 820.51(568.91-1,157.12)           | 12   | 806.46(588.09-1,077.73)           | 10   | 0.22(0.15,0.30)    | -0.35(-0.40,-0.30) | -0.04(-0.21,0.12)  | -0.08(-0.14,-0.02) |             |             |           | 7  |
| 85-90 years   | 922.43(696.71-1,204.07)           | 9    | 952.86(740.75-1,201.65)           | 5    | 0.02(-0.05,0.10)   | 0.43(0.32,0.54)    | -0.13(-0.31,0.06)  | 0.09(0.02,0.16)    |             |             |           | 4  |
| 90-94 years   | 1,037.20(724.46-1,423.52)         | 7    | 1,103.16(796.24-1,463.06)         | 4    | -0.13(-0.22,-0.04) | 1.19(0.87,1.50)    | -0.37(-0.44,-0.30) | 0.19(0.09,0.30)    |             |             |           | 2  |
| 95+ years     | 1,135.64(654.11-1,701.07)         | 6    | 1,283.43(794.17-1,831.07)         | 3    | -0.25(-0.46,-0.05) | 1.97(1.32,2.62)    | -0.35(-0.52,-0.17) | 0.40(0.18,0.62)    |             |             |           | 1  |
| <b>Number</b> |                                   |      |                                   |      |                    |                    |                    |                    |             |             |           |    |
| <5 years      | 16,662,759(12,338,677-22,543,654) | 1    | 16,547,167(12,210,642-22,486,820) | 1    | -1.12(-1.29,-0.94) | 0.65(0.04,1.28)    | 0.63(0.31,0.94)    | 0.03(-0.20,0.26)   |             |             |           | 20 |
| 5- 9 years    | 8,478,300(5,321,021-12,741,812)   | 2    | 9,566,704(5,985,443-14,483,251)   | 2    | -0.48(-0.60,-0.36) | 0.72(0.43,1.02)    | 1.06(0.44,1.68)    | 0.44(0.22,0.67)    |             |             |           | 17 |
| 10-14 years   | 4,864,999(2,870,301-7,049,241)    | 3    | 5,768,970(3,389,072-8,356,583)    | 3    | 1.20(1.07,1.33)    | -0.70(-0.90,-0.49) | 1.33(0.88,1.79)    | 0.63(0.47,0.80)    |             |             |           | 15 |
| 15-19 years   | 3,756,174(2,603,098-5,181,969)    | 4    | 4,106,455(2,818,099-5,673,169)    | 4    | 0.49(0.27,0.70)    | 0.19(0.11,0.28)    | 0.15(-0.04,0.34)   | 0.28(0.18,0.38)    |             |             |           | 18 |
| 20-24 years   | 3,154,768(2,123,026-4,501,246)    | 5    | 3,345,898(2,213,995-4,820,734)    | 5    | -0.18(-0.26,-0.09) | 1.19(1.11,1.27)    | -0.57(-0.83,-0.32) | 0.17(0.08,0.26)    |             |             |           | 19 |
| 25-29 years   | 2,581,639(1,857,487-3,417,662)    | 6    | 3,092,408(2,224,163-4,086,139)    | 6    | 0.62(0.46,0.77)    | 0.33(0.25,0.42)    | 0.84(0.62,1.07)    | 0.59(0.49,0.68)    |             |             |           | 16 |
| 30-34 years   | 2,135,902(1,510,899-2,874,481)    | 7    | 2,926,733(2,089,724-3,912,752)    | 7    | 1.93(1.78,2.09)    | -0.22(-0.33,-0.12) | 2.00(1.65,2.35)    | 1.13(1.01,1.26)    |             |             |           | 12 |
| 35-39 years   | 2,058,936(1,415,418-2,914,626)    | 8    | 2,707,196(1,885,392-3,818,909)    | 10   | 1.03(0.84,1.22)    | 0.65(0.53,0.77)    | 0.95(0.73,1.17)    | 0.91(0.79,1.03)    |             |             |           | 14 |
| 40-44 years   | 1,786,185(1,239,248-2,496,313)    | 11   | 2,597,206(1,828,598-3,572,394)    | 12   | 1.65(1.48,1.83)    | 1.83(1.66,1.99)    | 0.53(0.47,0.60)    | 1.26(1.17,1.35)    |             |             |           | 11 |
| 45-49 years   | 1,527,559(984,154-2,229,764)      | 13   | 2,642,941(1,773,137-3,748,824)    | 11   | 2.90(2.64,3.16)    | 1.46(1.25,1.67)    | 1.54(1.27,1.81)    | 1.96(1.79,2.13)    |             |             |           | 6  |
| 50-54 years   | 1,699,448(1,194,470-2,310,244)    | 12   | 2,799,344(2,002,029-3,759,895)    | 8    | 0.51(0.30,0.72)    | 2.05(1.85,2.24)    | 2.74(2.57,2.91)    | 1.77(1.65,1.90)    |             |             |           | 8  |
| 55-59 years   | 1,859,139(1,204,018-2,642,517)    | 9    | 2,752,269(1,876,738-3,827,984)    | 9    | -0.99(-1.12,-0.87) | 2.91(2.75,3.06)    | 2.21(1.77,2.64)    | 1.35(1.20,1.50)    |             |             |           | 9  |
| 60-64 years   | 1,834,164(1,270,882-2,460,905)    | 10   | 2,531,612(1,791,112-3,396,847)    | 13   | -0.86(-1.04,-0.67) | 1.19(1.05,1.33)    | 2.89(2.76,3.02)    | 1.13(1.03,1.23)    |             |             |           | 13 |



|             |                                |    |                                |    |                  |                 |                 |                 |    |
|-------------|--------------------------------|----|--------------------------------|----|------------------|-----------------|-----------------|-----------------|----|
| 65-69 years | 1,508,907(1,058,074-2,192,414) | 14 | 2,235,603(1,591,844-3,192,152) | 14 | 0.14(-0.05,0.34) | 0.30(0.18,0.42) | 4.00(3.87,4.12) | 1.35(1.25,1.44) | 10 |
| 70-74 years | 959,846(633,143-1,409,313)     | 15 | 1,613,827(1,118,873-2,276,647) | 15 | 1.94(1.81,2.07)  | 0.95(0.88,1.02) | 2.67(2.50,2.85) | 1.79(1.71,1.87) | 7  |
| 75-79 years | 552,406(400,082-732,704)       | 16 | 1,009,465(741,137-1,330,429)   | 16 | 1.81(1.55,2.07)  | 2.16(2.12,2.20) | 2.16(2.12,2.20) | 2.09(2.00,2.18) | 5  |
| 80-84 years | 288,979(200,368-407,534)       | 17 | 680,834(496,481-909,843)       | 17 | 1.83(1.50,2.17)  | 4.11(3.97,4.25) | 2.94(2.83,3.05) | 3.00(2.88,3.12) | 4  |
| 85-90 years | 138,998(104,986-181,437)       | 18 | 414,310(322,086-522,486)       | 18 | 3.48(3.31,3.65)  | 4.12(3.91,4.33) | 3.84(3.70,3.98) | 3.82(3.71,3.93) | 3  |
| 90-94 years | 45,699(31,920-62,720)          | 19 | 185,966(134,226-246,636)       | 19 | 4.94(4.82,5.06)  | 3.95(3.40,4.50) | 5.59(5.11,6.07) | 4.88(4.62,5.13) | 2  |
| 95+ years   | 11,691(6,734-17,512)           | 20 | 61,261(37,907-87,401)          | 20 | 5.80(5.46,6.15)  | 7.34(7.12,7.56) | 4.82(4.31,5.34) | 5.91(5.68,6.14) | 1  |

**sTable 2.** The incident cases and rate of incidence attributable to six immune mediated inflammatory diseases across 20 age groups, and its temporal trends from 1990 to 2019

|                                          | 1990                        |      | 2019                      |      | 1990-1999          |                     | 2000-2009          |                    | 2010-2019   |             | 1990-2019 |  |
|------------------------------------------|-----------------------------|------|---------------------------|------|--------------------|---------------------|--------------------|--------------------|-------------|-------------|-----------|--|
|                                          | N(95%CI)                    | Rank | N(95%CI)                  | Rank | AAPC(95%CI)        | AAPC(95%CI)         | AAPC(95%CI)        | AAPC(95%CI)        | AAPC(95%CI) | AAPC(95%CI) | Rank      |  |
| <b>Rate</b>                              |                             |      |                           |      |                    |                     |                    |                    |             |             |           |  |
| <b><i>Asthma</i></b>                     |                             |      |                           |      |                    |                     |                    |                    |             |             |           |  |
| <5 years                                 | 1,607.51(1,021.25-2,432.93) | 1    | 1,509.37(947.96-2,305.76) | 1    | -1.50(-1.73,-1.28) | 0.62 (-0.09,1.33)   | 0.57(-0.73,1.89)   | -0.04(-0.54,0.46)  | 6           |             |           |  |
| 5- 9 years                               | 950.58(479.63-1,598.96)     | 2    | 980.25(499.97-1,654.75)   | 2    | -1.18(-1.41,-0.94) | 1.03 (0.64,1.42)    | 0.97(0.01,1.94)    | 0.27(-0.07,0.61)   | 3           |             |           |  |
| 10-14 years                              | 583.93(265.12-932.45)       | 9    | 586.95(268.78-934.63)     | 5    | -0.79(-1.04,-0.55) | -0.37 (-0.43,-0.31) | 1.27(0.89,1.65)    | 0.01(-0.14,0.15)   | 5           |             |           |  |
| 15-19 years                              | 417.55(244.95-639.20)       | 13   | 387.86(227.90-590.65)     | 12   | -0.31(-0.42,-0.20) | -1.17 (-1.32,-1.02) | 0.76(0.44,1.09)    | -0.23(-0.35,-0.11) | 8           |             |           |  |
| 20-24 years                              | 306.06(148.42-522.84)       | 15   | 274.17(132.12-468.66)     | 14   | -0.24(-0.28,-0.20) | -1.30 (-1.35,-1.25) | 0.56(0.43,0.69)    | -0.36(-0.41,-0.32) | 9           |             |           |  |
| 25-29 years                              | 239.97(133.00-369.01)       | 19   | 211.70(120.50-323.89)     | 18   | -0.90(-0.97,-0.83) | -0.58 (-0.75,-0.40) | 0.45(0.22,0.69)    | -0.38(-0.48,-0.28) | 10          |             |           |  |
| 30-34 years                              | 222.69(115.69-356.70)       | 20   | 188.29(99.92-299.11)      | 20   | -1.99(-2.12,-1.86) | -0.49 (-0.84,-0.14) | 0.70(0.41,0.98)    | -0.62(-0.77,-0.47) | 12          |             |           |  |
| 35-39 years                              | 252.03(126.00-434.76)       | 18   | 210.97(110.31-362.04)     | 19   | -1.71(-1.88,-1.55) | -1.13 (-1.24,-1.02) | 1.19(1.03,1.36)    | -0.61(-0.70,-0.51) | 11          |             |           |  |
| 40-44 years                              | 284.14(145.83-476.35)       | 17   | 221.85(114.99-368.57)     | 17   | -2.03(-2.07,-1.98) | -1.76 (-2.02,-1.50) | 1.33(1.06,1.60)    | -0.87(-1.02,-0.72) | 14          |             |           |  |
| 45-49 years                              | 303.72(130.77-544.86)       | 16   | 223.57(99.62-397.07)      | 16   | -2.07(-2.42,-1.73) | -1.26 (-1.36,-1.16) | 0.50(0.26,0.75)    | -1.05(-1.20,-0.90) | 15          |             |           |  |
| 50-54 years                              | 409.74(235.01-627.15)       | 14   | 260.63(140.55-412.11)     | 15   | -2.95(-3.06,-2.84) | -1.71 (-1.89,-1.52) | -0.18(-0.88,0.53)  | -1.61(-1.85,-1.37) | 17          |             |           |  |
| 55-59 years                              | 591.39(302.82-944.42)       | 8    | 346.10(172.62-568.07)     | 13   | -3.49(-3.60,-3.39) | -2.07 (-2.41,-1.73) | 0.27(0.10,0.44)    | -1.81(-1.94,-1.68) | 18          |             |           |  |
| 60-64 years                              | 726.61(444.61-1,047.26)     | 5    | 410.67(241.23-619.51)     | 10   | -3.65(-3.74,-3.56) | -2.06 (-2.18,-1.95) | -0.06(-0.29,0.17)  | -1.94(-2.02,-1.85) | 19          |             |           |  |
| 65-69 years                              | 791.77(497.08-1,269.87)     | 3    | 454.17(273.54-755.50)     | 8    | -3.21(-3.29,-3.12) | -2.04 (-2.16,-1.92) | -0.60(-1.24,0.05)  | -1.95(-2.16,-1.74) | 20          |             |           |  |
| 70-74 years                              | 716.71(398.55-1,175.83)     | 6    | 458.23(261.23-743.81)     | 7    | -2.38(-2.61,-2.16) | -1.99 (-2.30,-1.67) | -0.32(-0.47,-0.17) | -1.57(-1.71,-1.43) | 16          |             |           |  |
| 75-79 years                              | 504.12(319.58-728.77)       | 11   | 410.24(260.54-597.06)     | 11   | -0.96(-1.05,-0.87) | -1.27 (-1.31,-1.23) | 0.12(-0.04,0.28)   | -0.73(-0.79,-0.67) | 13          |             |           |  |
| 80-84 years                              | 438.90(253.58-704.25)       | 12   | 431.59(276.28-634.23)     | 9    | 0.28(0.10,0.46)    | -0.55 (-0.69,-0.41) | -0.05(-0.29,0.19)  | -0.11(-0.23,0.01)  | 7           |             |           |  |
| 85-90 years                              | 533.52(366.68-747.94)       | 10   | 563.78(409.17-747.50)     | 6    | -0.08(-0.41,0.25)  | 0.77 (0.47,1.07)    | -0.14(-0.22,-0.06) | 0.15(-0.01,0.30)   | 4           |             |           |  |
| 90-94 years                              | 640.76(390.77-956.91)       | 7    | 705.40(462.52-996.72)     | 4    | -0.26(-0.35,-0.16) | 1.75 (1.62,1.88)    | -0.27(-0.52,-0.03) | 0.34(0.25,0.44)    | 2           |             |           |  |
| 95+ years                                | 740.63(366.16-1,185.69)     | 4    | 872.73(498.76-1,291.67)   | 3    | -0.46(-0.78,-0.14) | 2.78 (1.81,3.76)    | -0.45(-0.71,-0.19) | 0.54(0.21,0.86)    | 1           |             |           |  |
| <b><i>Inflammatory bowel disease</i></b> |                             |      |                           |      |                    |                     |                    |                    |             |             |           |  |
| <5 years                                 | 0.02(0.01-0.03)             | 20   | 0.02(0.02-0.03)           | 20   | 0.73(0.48,0.97)    | -0.03(-0.06,0.00)   | -0.22(-0.31,-0.13) | 0.15(0.06,0.23)    | 1           |             |           |  |
| 5- 9 years                               | 0.29(0.22-0.37)             | 19   | 0.29(0.22-0.38)           | 19   | 1.47(1.34,1.61)    | -0.31(-0.33,-0.29)  | -0.98(-1.04,-0.93) | 0.03(-0.02,0.08)   | 4           |             |           |  |
| 10-14 years                              | 1.04(0.84-1.31)             | 18   | 1.07(0.87-1.34)           | 18   | 0.96(0.89,1.04)    | 0.08(-0.03,0.19)    | -0.84(-0.96,-0.72) | 0.08(0.01,0.15)    | 3           |             |           |  |
| 15-19 years                              | 2.60(2.09-3.20)             | 17   | 2.70(2.20-3.27)           | 17   | 1.44(1.34,1.55)    | -0.22(-0.40,-0.03)  | -0.81(-0.91,-0.72) | 0.10(0.02,0.19)    | 2           |             |           |  |
| 20-24 years                              | 4.85(3.96-5.92)             | 16   | 4.82(4.02-5.76)           | 16   | 0.85(0.49,1.21)    | -0.53(-0.78,-0.28)  | -0.29(-0.40,-0.18) | 0.01(-0.14,0.16)   | 5           |             |           |  |
| 25-29 years                              | 7.46(6.00-9.21)             | 15   | 6.55(5.33-7.94)           | 15   | -0.72(-0.89,-0.55) | -0.21(-0.41,-0.01)  | -0.47(-0.54,-0.41) | -0.47(-0.56,-0.38) | 6           |             |           |  |
| 30-34 years                              | 9.51(7.43-11.79)            | 14   | 7.44(5.88-9.10)           | 14   | -2.30(-2.74,-1.85) | 0.00(-0.08,0.08)    | -0.46(-0.67,-0.25) | -0.86(-1.02,-0.70) | 11          |             |           |  |
| 35-39 years                              | 10.12(7.97-12.58)           | 5    | 7.94(6.40-9.70)           | 13   | -1.83(-2.13,-1.53) | -0.44(-0.95,0.08)   | 0.04(-0.03,0.10)   | -0.80(-0.99,-0.60) | 10          |             |           |  |
| 40-44 years                              | 10.98(8.58-13.70)           | 2    | 7.98(6.34-9.88)           | 12   | -2.65(-2.78,-2.52) | -0.73(-1.01,-0.44)  | -0.13(-0.20,-0.07) | -1.12(-1.24,-1.00) | 19          |             |           |  |
| 45-49 years                              | 10.49(8.17-13.10)           | 4    | 8.00(6.36-9.91)           | 11   | -2.14(-2.55,-1.74) | 0.13(-0.18,0.45)    | -0.59(-0.71,-0.47) | -0.95(-1.13,-0.77) | 15          |             |           |  |
| 50-54 years                              | 10.11(8.04-12.78)           | 6    | 7.92(6.36-9.89)           | 10   | -1.83(-1.96,-1.70) | -0.18(-0.36,-0.01)  | -0.83(-0.97,-0.70) | -0.88(-0.98,-0.78) | 13          |             |           |  |
| 55-59 years                              | 9.83(7.75-12.37)            | 9    | 8.18(6.57-10.18)          | 9    | -1.90(-2.09,-1.72) | 0.28(-0.19,0.75)    | 0.24(0.03,0.45)    | -0.52(-0.72,-0.33) | 7           |             |           |  |

|             |                   |    |                  |   |                    |                    |                    |                    |    |
|-------------|-------------------|----|------------------|---|--------------------|--------------------|--------------------|--------------------|----|
| 60-64 years | 10.01(7.75-12.65) | 7  | 8.09(6.36-10.13) | 8 | -2.68(-2.91,-2.44) | 0.51(-0.29,1.32)   | -0.22(-0.42,-0.03) | -0.75(-1.02,-0.48) | 9  |
| 65-69 years | 9.96(7.75-12.67)  | 8  | 7.77(6.07-9.82)  | 7 | -3.03(-3.12,-2.93) | 0.50(0.45,0.55)    | 0.08(-0.11,0.27)   | -0.86(-0.93,-0.79) | 12 |
| 70-74 years | 9.57(7.27-12.40)  | 12 | 7.72(5.98-9.93)  | 6 | -2.30(-2.62,-1.98) | -0.41(-0.57,-0.26) | 0.45(0.39,0.51)    | -0.73(-0.85,-0.61) | 8  |
| 75-79 years | 9.68(7.45-12.45)  | 11 | 7.47(5.73-9.75)  | 5 | -2.13(-2.31,-1.95) | -0.76(-0.82,-0.70) | 0.21(0.13,0.29)    | -0.89(-0.95,-0.82) | 14 |
| 80-84 years | 9.55(7.33-12.25)  | 13 | 7.26(5.52-9.42)  | 4 | -1.81(-2.09,-1.52) | -0.12(-0.35,0.10)  | -0.93(-1.01,-0.84) | -1.01(-1.14,-0.88) | 17 |
| 85-90 years | 9.80(7.48-12.74)  | 10 | 7.30(5.55-9.56)  | 3 | -1.45(-1.53,-1.37) | -0.28(-0.39,-0.17) | -1.29(-1.42,-1.17) | -0.99(-1.06,-0.92) | 16 |
| 90-94 years | 10.83(8.04-14.19) | 3  | 8.00(5.91-10.57) | 2 | -2.00(-2.14,-1.87) | -0.19(-0.22,-0.16) | -1.11(-1.18,-1.04) | -1.04(-1.09,-0.99) | 18 |
| 95+ years   | 12.42(8.74-16.88) | 1  | 8.99(6.31-12.48) | 1 | -1.78(-1.98,-1.58) | -0.33(-0.40,-0.27) | -1.07(-1.19,-0.94) | -1.12(-1.20,-1.03) | 20 |

**Multiple sclerosis**

|             |                 |    |                 |    |                    |                    |                    |                    |    |
|-------------|-----------------|----|-----------------|----|--------------------|--------------------|--------------------|--------------------|----|
| <5 years    | 0.00(0.00-0.00) | 20 | 0.00(0.00-0.00) | 20 |                    |                    |                    |                    |    |
| 5- 9 years  | 0.05(0.02-0.10) | 19 | 0.05(0.02-0.10) | 19 | -0.14(-0.19,-0.10) | 0.01(-0.01,0.02)   | 0.11(0.05,0.17)    | 0.00(-0.02,0.03)   | 3  |
| 10-14 years | 0.24(0.13-0.40) | 18 | 0.24(0.13-0.38) | 18 | -0.62(-0.73,-0.50) | 0.14(0.13,0.16)    | 0.22(0.17,0.28)    | -0.07(-0.11,-0.03) | 5  |
| 15-19 years | 0.59(0.38-0.89) | 8  | 0.60(0.39-0.88) | 8  | 0.41(0.36,0.47)    | -0.18(-0.28,-0.08) | -0.01(-0.06,0.05)  | 0.06(0.02,0.11)    | 2  |
| 20-24 years | 1.16(0.71-1.82) | 5  | 1.22(0.78-1.86) | 4  | 0.56(0.39,0.73)    | -0.27(-0.43,-0.10) | 0.21(0.11,0.31)    | 0.20(0.11,0.29)    | 1  |
| 25-29 years | 1.71(1.14-2.35) | 2  | 1.68(1.13-2.27) | 1  | -0.57(-0.75,-0.39) | 0.58(0.52,0.64)    | -0.15(-0.38,0.07)  | -0.05(-0.14,0.05)  | 4  |
| 30-34 years | 1.84(1.14-2.61) | 1  | 1.66(1.04-2.30) | 2  | -1.60(-1.74,-1.47) | 0.35(0.21,0.49)    | -0.13(-0.31,0.04)  | -0.39(-0.49,-0.30) | 15 |
| 35-39 years | 1.61(1.01-2.21) | 3  | 1.50(0.96-2.05) | 3  | -0.54(-0.73,-0.35) | -0.62(-0.88,-0.35) | 0.77(0.63,0.91)    | -0.16(-0.29,-0.03) | 6  |
| 40-44 years | 1.41(0.83-2.01) | 4  | 1.19(0.70-1.68) | 5  | -1.31(-1.48,-1.15) | -1.09(-1.24,-0.94) | 0.29(0.20,0.39)    | -0.64(-0.73,-0.56) | 17 |
| 45-49 years | 1.14(0.75-1.64) | 6  | 0.93(0.60-1.35) | 6  | -1.20(-1.30,-1.10) | -0.22(-0.47,0.04)  | -0.54(-0.72,-0.35) | -0.70(-0.81,-0.59) | 18 |
| 50-54 years | 0.87(0.48-1.37) | 7  | 0.68(0.37-1.10) | 7  | -1.38(-1.51,-1.25) | -0.51(-0.61,-0.41) | -0.82(-0.96,-0.68) | -0.86(-0.95,-0.77) | 19 |
| 55-59 years | 0.51(0.35-0.69) | 9  | 0.44(0.30-0.60) | 9  | -0.82(-0.93,-0.72) | -0.60(-0.71,-0.48) | 0.04(-0.37,0.45)   | -0.48(-0.62,-0.34) | 16 |
| 60-64 years | 0.33(0.22-0.43) | 17 | 0.31(0.19-0.41) | 17 | -0.50(-0.50,-0.49) | -0.36(-0.37,-0.35) | -0.05(-0.09,-0.01) | -0.30(-0.32,-0.29) | 12 |
| 65-69 years | 0.34(0.24-0.43) | 16 | 0.32(0.21-0.40) | 16 | -0.45(-0.49,-0.41) | -0.32(-0.54,-0.10) | -0.22(-0.27,-0.17) | -0.33(-0.40,-0.26) | 14 |
| 70-74 years | 0.35(0.23-0.44) | 15 | 0.32(0.21-0.42) | 15 | -0.40(-0.49,-0.31) | -0.13(-0.17,-0.09) | -0.43(-0.46,-0.40) | -0.32(-0.35,-0.29) | 13 |
| 75-79 years | 0.36(0.26-0.44) | 14 | 0.33(0.24-0.42) | 14 | -0.43(-0.54,-0.31) | -0.08(-0.10,-0.05) | -0.34(-0.39,-0.28) | -0.27(-0.31,-0.23) | 11 |
| 80-84 years | 0.36(0.28-0.43) | 13 | 0.34(0.26-0.41) | 13 | -0.40(-0.47,-0.33) | -0.07(-0.08,-0.06) | -0.17(-0.21,-0.14) | -0.20(-0.23,-0.18) | 9  |
| 85-90 years | 0.36(0.27-0.44) | 11 | 0.34(0.26-0.42) | 10 | -0.40(-0.48,-0.33) | -0.06(-0.10,-0.03) | -0.11(-0.13,-0.10) | -0.18(-0.21,-0.16) | 7  |
| 90-94 years | 0.36(0.24-0.45) | 12 | 0.34(0.23-0.43) | 12 | -0.40(-0.46,-0.34) | 0.02(-0.02,0.05)   | -0.15(-0.18,-0.12) | -0.19(-0.22,-0.16) | 8  |
| 95+ years   | 0.36(0.21-0.46) | 10 | 0.34(0.20-0.44) | 11 | -0.51(-0.55,-0.48) | -0.07(-0.12,-0.02) | -0.04(-0.10,0.03)  | -0.21(-0.24,-0.18) | 10 |

**Rheumatoid arthritis**

|             |                   |    |                   |    |                  |                 |                    |                  |    |
|-------------|-------------------|----|-------------------|----|------------------|-----------------|--------------------|------------------|----|
| <5 years    | 0.00(0.00-0.00)   | 20 | 0.00(0.00-0.00)   | 20 |                  |                 |                    |                  |    |
| 5- 9 years  | 1.06(0.62-1.66)   | 19 | 1.07(0.63-1.69)   | 19 | 0.18(-0.07,0.43) | 0.19(0.14,0.23) | -0.34(-0.47,-0.21) | 0.02(-0.07,0.11) | 15 |
| 10-14 years | 3.15(2.35-4.06)   | 17 | 3.30(2.46-4.28)   | 17 | 0.25(0.13,0.36)  | 0.29(0.23,0.35) | -0.17(-0.28,-0.06) | 0.14(0.08,0.20)  | 14 |
| 15-19 years | 5.17(3.64-7.27)   | 16 | 5.62(3.96-7.93)   | 16 | 0.39(0.38,0.40)  | 0.39(0.38,0.40) | -0.01(-0.09,0.07)  | 0.27(0.24,0.29)  | 2  |
| 20-24 years | 6.76(5.12-8.75)   | 14 | 7.45(5.64-9.71)   | 14 | 0.46(0.44,0.48)  | 0.46(0.44,0.48) | 0.02(-0.09,0.13)   | 0.32(0.29,0.36)  | 1  |
| 25-29 years | 8.02(5.39-10.74)  | 13 | 8.68(5.81-11.62)  | 13 | 0.25(0.12,0.38)  | 0.49(0.45,0.53) | -0.06(-0.20,0.08)  | 0.25(0.18,0.31)  | 3  |
| 30-34 years | 10.27(7.77-13.16) | 12 | 11.00(8.25-14.19) | 11 | 0.22(0.16,0.28)  | 0.40(0.34,0.46) | 0.00(-0.15,0.14)   | 0.22(0.16,0.28)  | 6  |
| 35-39 years | 13.55(9.42-18.14) | 10 | 14.46(9.99-19.45) | 10 | 0.30(0.28,0.32)  | 0.30(0.28,0.32) | 0.10(-0.23,0.43)   | 0.24(0.14,0.34)  | 4  |

|                                 |                         |    |                         |    |                    |                    |                    |                    |    |
|---------------------------------|-------------------------|----|-------------------------|----|--------------------|--------------------|--------------------|--------------------|----|
| 40-44 years                     | 17.67(13.43-22.29)      | 8  | 18.70(14.06-23.79)      | 8  | 0.17(0.13,0.22)    | 0.43(0.42,0.45)    | -0.09(-0.25,0.07)  | 0.19(0.14,0.24)    | 10 |
| 45-49 years                     | 22.40(16.08-30.31)      | 6  | 23.72(16.86-32.07)      | 6  | 0.23(0.20,0.26)    | 0.45(0.43,0.47)    | -0.16(-0.31,0.00)  | 0.19(0.14,0.24)    | 11 |
| 50-54 years                     | 26.36(20.29-32.96)      | 5  | 28.22(21.55-35.61)      | 5  | 0.65(0.54,0.76)    | 0.28(0.23,0.33)    | -0.28(-0.45,-0.11) | 0.22(0.15,0.29)    | 7  |
| 55-59 years                     | 30.57(21.49-40.51)      | 4  | 32.23(22.56-42.97)      | 4  | 0.41(0.16,0.65)    | 0.32(0.22,0.42)    | -0.43(-0.63,-0.23) | 0.15(0.02,0.27)    | 13 |
| 60-64 years                     | 34.65(25.73-44.38)      | 2  | 37.22(27.60-48.08)      | 2  | 0.48(0.38,0.58)    | 0.72(0.50,0.94)    | -0.55(-0.76,-0.35) | 0.21(0.10,0.32)    | 8  |
| 65-69 years                     | 35.81(26.48-46.01)      | 1  | 38.38(28.25-49.26)      | 1  | 0.07(-0.04,0.18)   | 0.75(0.66,0.83)    | -0.23(-0.31,-0.16) | 0.24(0.18,0.30)    | 5  |
| 70-74 years                     | 30.63(21.89-40.64)      | 3  | 32.24(22.70-43.00)      | 3  | -0.60(-0.66,-0.54) | 0.46(0.42,0.50)    | 0.59(0.41,0.77)    | 0.17(0.11,0.23)    | 12 |
| 75-79 years                     | 21.21(17.46-25.11)      | 7  | 22.50(18.38-26.93)      | 7  | 0.12(-0.05,0.28)   | -0.09(-0.16,-0.01) | 0.68(0.46,0.90)    | 0.21(0.11,0.31)    | 9  |
| 80-84 years                     | 14.86(11.48-18.78)      | 9  | 14.50(11.07-18.57)      | 9  | 0.20(-0.01,0.42)   | -0.68(-0.85,-0.50) | 0.02(-0.05,0.09)   | -0.11(-0.21,-0.01) | 16 |
| 85-90 years                     | 10.60(8.20-13.42)       | 11 | 10.18(7.78-13.00)       | 12 | 0.25(0.23,0.28)    | -0.29(-0.33,-0.25) | -0.33(-0.45,-0.22) | -0.12(-0.16,-0.08) | 17 |
| 90-94 years                     | 6.38(4.96-8.02)         | 15 | 6.01(4.60-7.64)         | 15 | 0.32(0.16,0.48)    | -0.06(-0.22,0.10)  | -0.81(-1.33,-0.29) | -0.16(-0.34,0.02)  | 18 |
| 95+ years                       | 1.65(1.28-2.06)         | 18 | 1.54(1.18-1.96)         | 18 | 0.40(0.22,0.59)    | -0.09(-0.19,0.02)  | -1.10(-1.79,-0.42) | -0.25(-0.48,-0.02) | 19 |
| <b><i>Psoriasis</i></b>         |                         |    |                         |    |                    |                    |                    |                    |    |
| <5 years                        | 34.84(31.48-38.02)      | 17 | 29.55(26.70-32.21)      | 18 | -0.38(-0.44,-0.31) | -0.76(-0.80,-0.73) | -0.58(-0.64,-0.51) | -0.57(-0.61,-0.53) | 6  |
| 5- 9 years                      | 41.77(36.96-46.51)      | 16 | 34.35(30.24-38.30)      | 16 | -0.43(-0.50,-0.36) | -0.91(-0.96,-0.87) | -0.68(-0.71,-0.65) | -0.67(-0.69,-0.64) | 8  |
| 10-14 years                     | 43.28(37.70-49.12)      | 15 | 35.08(30.47-39.87)      | 15 | -0.66(-0.67,-0.64) | -0.76(-0.78,-0.75) | -0.76(-0.86,-0.65) | -0.73(-0.76,-0.69) | 11 |
| 15-19 years                     | 47.17(40.70-53.59)      | 13 | 37.05(32.05-42.21)      | 14 | -0.86(-0.87,-0.84) | -0.73(-0.76,-0.70) | -0.88(-0.93,-0.83) | -0.83(-0.85,-0.81) | 15 |
| 20-24 years                     | 55.65(48.06-64.05)      | 12 | 43.94(37.84-50.72)      | 12 | -0.94(-0.99,-0.89) | -0.79(-0.83,-0.75) | -0.77(-0.89,-0.64) | -0.83(-0.87,-0.78) | 16 |
| 25-29 years                     | 69.30(60.66-79.44)      | 10 | 54.34(47.54-62.35)      | 11 | -1.01(-1.03,-0.99) | -0.75(-0.82,-0.69) | -0.74(-0.81,-0.67) | -0.84(-0.87,-0.81) | 17 |
| 30-34 years                     | 80.43(70.17-91.36)      | 9  | 62.80(54.78-71.26)      | 9  | -0.82(-0.90,-0.74) | -0.90(-0.93,-0.87) | -0.84(-0.86,-0.81) | -0.86(-0.88,-0.83) | 18 |
| 35-39 years                     | 91.70(80.32-103.81)     | 7  | 71.16(62.34-80.60)      | 8  | -0.70(-0.72,-0.67) | -0.90(-0.92,-0.88) | -1.03(-1.05,-1.00) | -0.87(-0.89,-0.86) | 19 |
| 40-44 years                     | 102.02(89.02-115.17)    | 6  | 78.56(68.63-88.39)      | 6  | -0.82(-0.84,-0.81) | -0.67(-0.70,-0.64) | -1.19(-1.23,-1.16) | -0.90(-0.92,-0.88) | 20 |
| 45-49 years                     | 108.76(94.97-123.49)    | 5  | 86.07(74.95-97.85)      | 5  | -0.60(-0.65,-0.55) | -0.75(-0.77,-0.74) | -1.01(-1.04,-0.99) | -0.80(-0.82,-0.78) | 14 |
| 50-54 years                     | 119.86(104.84-136.59)   | 3  | 96.15(83.87-109.88)     | 3  | -0.43(-0.47,-0.40) | -0.96(-1.03,-0.89) | -0.89(-0.96,-0.82) | -0.75(-0.78,-0.71) | 13 |
| 55-59 years                     | 121.89(107.16-137.98)   | 1  | 99.75(87.83-112.77)     | 1  | -0.61(-0.64,-0.57) | -0.71(-0.83,-0.59) | -0.67(-0.71,-0.63) | -0.68(-0.72,-0.64) | 9  |
| 60-64 years                     | 120.11(104.76-136.12)   | 2  | 97.42(85.18-110.67)     | 2  | -0.87(-0.92,-0.83) | -0.48(-0.51,-0.45) | -0.85(-0.98,-0.72) | -0.72(-0.76,-0.67) | 10 |
| 65-69 years                     | 113.68(98.82-128.42)    | 4  | 91.66(80.00-103.59)     | 4  | -1.04(-1.09,-1.00) | -0.58(-0.61,-0.55) | -0.64(-0.72,-0.56) | -0.73(-0.76,-0.70) | 12 |
| 70-74 years                     | 88.44(76.28-100.79)     | 8  | 75.90(65.40-86.36)      | 7  | -0.55(-0.65,-0.45) | -0.59(-0.62,-0.56) | -0.43(-0.48,-0.38) | -0.53(-0.56,-0.49) | 5  |
| 75-79 years                     | 65.20(55.78-75.23)      | 11 | 55.29(47.52-63.66)      | 10 | -0.55(-0.61,-0.49) | -0.65(-0.68,-0.63) | -0.50(-0.52,-0.48) | -0.57(-0.59,-0.55) | 7  |
| 80-84 years                     | 46.18(39.28-53.56)      | 14 | 39.81(33.89-46.33)      | 13 | -0.93(-1.22,-0.64) | -0.19(-0.38,0.00)  | -0.57(-0.61,-0.52) | -0.52(-0.65,-0.40) | 4  |
| 85-90 years                     | 33.69(28.53-39.40)      | 18 | 29.82(25.19-34.73)      | 17 | -0.22(-0.31,-0.14) | -0.36(-0.58,-0.14) | -0.66(-0.72,-0.60) | -0.45(-0.53,-0.37) | 3  |
| 90-94 years                     | 28.40(23.69-33.18)      | 19 | 25.75(21.52-30.06)      | 19 | 0.00(-0.03,0.04)   | -0.66(-0.78,-0.55) | -0.40(-0.53,-0.27) | -0.31(-0.38,-0.25) | 2  |
| 95+ years                       | 26.67(21.41-32.57)      | 20 | 25.66(20.47-31.50)      | 20 | 0.05(-0.15,0.24)   | 0.18(0.11,0.25)    | -0.53(-0.74,-0.31) | -0.12(-0.22,-0.01) | 1  |
| <b><i>Atopic dermatitis</i></b> |                         |    |                         |    |                    |                    |                    |                    |    |
| <5 years                        | 993.65(899.21-1,095.40) | 1  | 957.45(867.48-1,054.47) | 1  | -0.14(-0.16,-0.12) | -0.20(-0.26,-0.15) | -0.04(-0.11,0.03)  | -0.13(-0.16,-0.10) | 14 |
| 5- 9 years                      | 455.14(391.88-529.88)   | 2  | 445.21(383.15-516.97)   | 2  | 0.04(-0.03,0.11)   | 0.05(-0.08,0.18)   | -0.39(-0.43,-0.35) | -0.10(-0.15,-0.05) | 13 |
| 10-14 years                     | 274.84(228.68-326.13)   | 9  | 271.69(225.04-320.76)   | 10 | -0.03(-0.04,-0.03) | 0.09(0.09,0.10)    | -0.20(-0.22,-0.18) | -0.04(-0.05,-0.03) | 10 |
| 15-19 years                     | 249.82(209.21-293.15)   | 14 | 229.00(188.37-270.76)   | 14 | -0.32(-0.34,-0.30) | -0.14(-0.15,-0.12) | -0.43(-0.45,-0.41) | -0.30(-0.31,-0.28) | 17 |

|             |                       |    |                       |    |                    |                    |                    |                    |    |
|-------------|-----------------------|----|-----------------------|----|--------------------|--------------------|--------------------|--------------------|----|
| 20-24 years | 265.86(224.65-310.26) | 11 | 225.92(188.52-266.55) | 16 | -0.67(-0.69,-0.65) | -0.09(-0.13,-0.05) | -1.03(-1.07,-0.99) | -0.57(-0.59,-0.55) | 20 |
| 25-29 years | 256.51(213.25-301.01) | 12 | 227.80(187.04-266.80) | 15 | -0.20(-0.33,-0.06) | -0.81(-0.86,-0.77) | -0.26(-0.44,-0.08) | -0.41(-0.49,-0.33) | 19 |
| 30-34 years | 229.13(189.61-269.79) | 17 | 215.19(177.42-254.28) | 18 | 0.74(0.60,0.88)    | -0.95(-1.03,-0.87) | -0.15(-0.11,0.02)  | -0.18(-0.26,-0.11) | 16 |
| 35-39 years | 214.68(176.55-254.78) | 18 | 194.40(158.52-232.09) | 20 | -0.12(-0.28,0.03)  | -0.25(-0.54,0.04)  | -0.91(-0.98,-0.84) | -0.39(-0.51,-0.27) | 18 |
| 40-44 years | 207.69(175.18-242.42) | 20 | 198.06(165.85-231.66) | 19 | 0.18(0.05,0.31)    | 0.40(0.27,0.52)    | -0.82(-0.89,-0.76) | -0.13(-0.21,-0.06) | 15 |
| 45-49 years | 210.77(172.73-246.00) | 19 | 215.53(175.85-252.98) | 17 | 0.52(0.48,0.56)    | -0.18(-0.26,-0.09) | -0.22(-0.28,-0.15) | 0.09(0.05,0.13)    | 3  |
| 50-54 years | 232.47(193.21-275.86) | 16 | 247.25(205.62-292.17) | 13 | 0.44(0.40,0.48)    | 0.03(-0.04,0.11)   | 0.38(0.10,0.65)    | 0.25(0.16,0.35)    | 1  |
| 55-59 years | 248.49(209.79-289.23) | 15 | 255.13(215.96-297.18) | 12 | -0.05(-0.12,0.03)  | 0.34(0.31,0.37)    | -0.14(-0.33,0.04)  | 0.07(0.00,0.13)    | 6  |
| 60-64 years | 250.04(208.05-291.06) | 13 | 256.32(212.54-298.08) | 11 | 0.11(0.06,0.17)    | 0.17(0.13,0.20)    | 0.02(-0.07,0.11)   | 0.09(0.05,0.13)    | 4  |
| 65-69 years | 270.34(226.45-318.00) | 10 | 272.26(227.52-315.91) | 9  | -0.12(-0.16,-0.07) | -0.12(-0.17,-0.08) | 0.27(0.25,0.29)    | 0.03(0.00,0.05)    | 8  |
| 70-74 years | 290.02(244.94-337.46) | 8  | 288.20(242.54-333.35) | 8  | -0.09(-0.11,-0.06) | -0.16(-0.24,-0.08) | 0.16(0.08,0.24)    | -0.04(-0.10,0.01)  | 11 |
| 75-79 years | 300.45(252.04-353.10) | 7  | 298.69(250.92-349.33) | 7  | 0.23(0.18,0.28)    | -0.16(-0.29,-0.04) | -0.23(-0.28,-0.17) | -0.04(-0.09,0.01)  | 12 |
| 80-84 years | 310.66(256.96-367.85) | 6  | 312.96(261.07-368.77) | 6  | 0.29(0.27,0.31)    | -0.08(-0.12,-0.04) | -0.10(-0.19,0.00)  | 0.03(0.00,0.07)    | 9  |
| 85-90 years | 334.45(285.56-390.13) | 5  | 341.43(292.81-396.44) | 5  | 0.33(0.31,0.35)    | 0.16(0.10,0.22)    | -0.22(-0.29,-0.14) | 0.08(0.04,0.11)    | 5  |
| 90-94 years | 350.47(296.76-410.77) | 4  | 357.66(301.46-417.64) | 4  | 0.23(0.19,0.28)    | 0.27(0.24,0.31)    | -0.33(-0.38,-0.27) | 0.07(0.04,0.10)    | 7  |
| 95+ years   | 353.92(256.31-463.40) | 3  | 374.17(267.26-493.01) | 3  | 0.22(0.19,0.26)    | 0.45(0.23,0.67)    | -0.06(-0.10,-0.03) | 0.20(0.13,0.27)    | 2  |

**Number of incident cases**

***Asthma***

|             |                                  |    |                                  |    |                    |                    |                 |                  |    |
|-------------|----------------------------------|----|----------------------------------|----|--------------------|--------------------|-----------------|------------------|----|
| <5 years    | 10,161,359(6,455,506-15,378,937) | 1  | 10,004,724(6,283,513-15,283,571) | 1  | -1.57(-1.84,-1.31) | 1.01(-0.32,2.34)   | 0.82(0.30,1.34) | 0.04(-0.41,0.50) | 20 |
| 5- 9 years  | 5,562,422(2,806,587-9,356,499)   | 2  | 6,417,739(3,273,311-10,833,682)  | 2  | -0.84(-0.99,-0.68) | 1.06(0.67,1.45)    | 1.50(0.70,2.30) | 0.59(0.30,0.88)  | 14 |
| 10-14 years | 3,133,916(1,422,898-5,004,360)   | 3  | 3,769,324(1,726,065-6,002,079)   | 3  | 1.06(0.87,1.25)    | -0.87(-1.17,-0.57) | 1.88(1.23,2.54) | 0.71(0.47,0.95)  | 12 |
| 15-19 years | 2,169,583(1,272,772-3,321,297)   | 4  | 2,402,948(1,411,948-3,659,320)   | 4  | 0.45(0.10,0.80)    | -0.13(-0.29,0.02)  | 0.58(0.32,0.85) | 0.29(0.13,0.46)  | 18 |
| 20-24 years | 1,507,890(731,246-2,575,884)     | 5  | 1,645,434(792,918-2,812,667)     | 5  | 0.06(0.02,0.11)    | 0.59(0.55,0.62)    | 0.14(0.03,0.24) | 0.28(0.25,0.32)  | 19 |
| 25-29 years | 1,062,690(588,987-1,634,115)     | 8  | 1,281,779(729,569-1,961,082)     | 8  | 0.28(0.21,0.35)    | 0.32(0.27,0.38)    | 1.43(1.34,1.53) | 0.65(0.60,0.69)  | 13 |
| 30-34 years | 858,763(446,120-1,375,539)       | 12 | 1,133,008(601,239-1,799,833)     | 12 | 0.55(0.46,0.64)    | 0.01(-0.03,0.06)   | 2.46(2.34,2.58) | 0.97(0.92,1.03)  | 9  |
| 35-39 years | 889,031(444,438-1,533,570)       | 10 | 1,141,320(596,745-1,958,526)     | 10 | 0.20(0.16,0.24)    | 0.31(0.24,0.37)    | 2.21(1.89,2.52) | 0.86(0.76,0.96)  | 11 |
| 40-44 years | 813,465(417,495-1,363,757)       | 13 | 1,094,700(567,432-1,818,707)     | 13 | 0.63(0.40,0.86)    | 0.76(0.68,0.83)    | 1.76(1.55,1.97) | 0.98(0.87,1.10)  | 8  |
| 45-49 years | 705,875(303,915-1,266,307)       | 14 | 1,059,301(472,020-1,881,306)     | 14 | 1.68(1.48,1.88)    | 0.66(0.54,0.77)    | 2.17(1.92,2.43) | 1.45(1.33,1.57)  | 6  |
| 50-54 years | 871,060(499,617-1,333,259)       | 11 | 1,138,467(613,965-1,800,162)     | 11 | -1.08(-1.20,-0.95) | 1.22(1.15,1.28)    | 2.48(2.35,2.60) | 0.89(0.82,0.95)  | 10 |
| 55-59 years | 1,096,537(561,477-1,751,094)     | 7  | 1,284,061(640,453-2,107,612)     | 6  | -2.38(-2.72,-2.04) | 1.66(1.55,1.78)    | 2.73(2.18,3.28) | 0.57(0.34,0.80)  | 15 |
| 60-64 years | 1,167,255(714,242-1,682,343)     | 6  | 1,283,484(753,916-1,936,200)     | 7  | -2.14(-2.24,-2.05) | 0.19(-0.43,0.81)   | 2.77(2.57,2.97) | 0.30(0.08,0.52)  | 17 |
| 65-69 years | 977,746(613,841-1,568,146)       | 9  | 1,174,412(707,333-1,953,588)     | 9  | -0.81(-1.09,-0.53) | -0.64(-0.92,-0.37) | 3.50(3.28,3.72) | 0.56(0.40,0.72)  | 16 |
| 70-74 years | 605,720(336,830-993,737)         | 15 | 857,280(488,723-1,391,581)       | 15 | 1.07(0.95,1.19)    | 0.17(0.11,0.24)    | 2.60(2.36,2.84) | 1.22(1.13,1.31)  | 7  |
| 75-79 years | 309,070(195,933-446,803)         | 16 | 521,221(331,020-758,592)         | 16 | 1.36(1.02,1.70)    | 1.65(1.41,1.88)    | 2.17(2.06,2.29) | 1.77(1.63,1.92)  | 5  |
| 80-84 years | 154,580(89,310-248,034)          | 17 | 364,360(233,245-535,433)         | 17 | 1.91(1.57,2.25)    | 3.77(3.69,3.84)    | 2.98(2.84,3.13) | 2.95(2.82,3.07)  | 4  |
| 85-90 years | 80,395(55,254-112,705)           | 18 | 245,135(177,910-325,019)         | 18 | 3.42(3.20,3.63)    | 4.27(4.12,4.42)    | 3.94(3.80,4.08) | 3.89(3.78,4.00)  | 3  |
| 90-94 years | 28,232(17,217-42,161)            | 19 | 118,914(77,970-168,024)          | 19 | 4.70(4.50,4.91)    | 4.65(3.83,5.47)    | 5.61(5.40,5.81) | 5.00(4.72,5.27)  | 2  |
| 95+ years   | 7,624(3,769-12,206)              | 20 | 41,657(23,807-61,654)            | 20 | 5.51(5.08,5.95)    | 7.84(7.49,8.19)    | 5.03(4.42,5.64) | 6.10(5.81,6.38)  | 1  |

**Inflammatory bowel disease**

|             |                       |    |                       |    |                    |                    |                    |                 |    |
|-------------|-----------------------|----|-----------------------|----|--------------------|--------------------|--------------------|-----------------|----|
| <5 years    | 143(93-205)           | 19 | 157(103-225)          | 20 | 0.51(0.42,0.61)    | 0.37(0.14,0.59)    | 0.03(-0.10,0.16)   | 0.32(0.23,0.42) | 20 |
| 5- 9 years  | 1,691(1,306-2,157)    | 16 | 1,896(1,450-2,456)    | 17 | 1.90(1.84,1.96)    | -0.16(-0.23,-0.09) | -0.47(-0.57,-0.36) | 0.38(0.33,0.43) | 19 |
| 10-14 years | 5,578(4,492-7,012)    | 14 | 6,888(5,571-8,607)    | 14 | 2.71(2.62,2.79)    | -0.36(-0.74,0.01)  | -0.27(-0.35,-0.20) | 0.72(0.59,0.84) | 13 |
| 15-19 years | 13,485(10,856-16,615) | 10 | 16,718(13,620-20,286) | 11 | 2.33(2.14,2.53)    | 0.57(0.44,0.70)    | -0.78(-0.84,-0.72) | 0.72(0.64,0.80) | 14 |
| 20-24 years | 23,877(19,515-29,145) | 6  | 28,911(24,106-34,576) | 8  | 1.27(1.01,1.53)    | 1.19(1.15,1.24)    | -0.69(-0.78,-0.60) | 0.63(0.54,0.72) | 16 |
| 25-29 years | 33,043(26,576-40,798) | 3  | 39,642(32,289-48,092) | 3  | 0.56(0.45,0.67)    | 0.71(0.63,0.80)    | 0.55(0.41,0.70)    | 0.61(0.54,0.68) | 17 |
| 30-34 years | 36,680(28,641-45,452) | 1  | 44,770(35,357-54,787) | 1  | 0.26(0.03,0.49)    | 0.43(0.34,0.52)    | 1.33(1.26,1.40)    | 0.68(0.60,0.77) | 15 |
| 35-39 years | 35,702(28,112-44,369) | 2  | 42,937(34,623-52,499) | 2  | -0.01(-0.17,0.16)  | 1.06(0.85,1.28)    | 0.77(0.41,1.12)    | 0.57(0.42,0.72) | 18 |
| 40-44 years | 31,426(24,576-39,230) | 4  | 39,392(31,307-48,740) | 4  | 0.13(-0.29,0.56)   | 1.80(1.66,1.93)    | 0.33(0.17,0.49)    | 0.75(0.60,0.90) | 12 |
| 45-49 years | 24,370(18,979-30,454) | 5  | 37,906(30,116-46,956) | 5  | 1.56(1.12,2.01)    | 2.22(2.07,2.38)    | 1.20(0.97,1.43)    | 1.61(1.42,1.80) | 10 |
| 50-54 years | 21,496(17,083-27,172) | 7  | 34,583(27,777-43,204) | 6  | 0.07(-0.12,0.26)   | 2.61(2.53,2.70)    | 1.94(1.76,2.12)    | 1.65(1.54,1.77) | 8  |
| 55-59 years | 18,230(14,375-22,927) | 8  | 30,351(24,378-37,753) | 7  | -0.78(-0.91,-0.64) | 4.03(3.65,4.40)    | 2.30(2.11,2.49)    | 1.77(1.61,1.93) | 6  |
| 60-64 years | 16,079(12,455-20,327) | 9  | 25,296(19,874-31,648) | 9  | -1.23(-1.35,-1.12) | 2.69(2.55,2.82)    | 2.98(2.87,3.09)    | 1.60(1.52,1.68) | 11 |
| 65-69 years | 12,299(9,572-15,650)  | 11 | 20,101(15,698-25,394) | 10 | -0.91(-1.15,-0.67) | 1.89(1.65,2.13)    | 4.27(3.55,4.99)    | 1.64(1.39,1.89) | 9  |
| 70-74 years | 8,089(6,142-10,479)   | 12 | 14,438(11,180-18,586) | 12 | 1.33(1.00,1.67)    | 1.52(1.37,1.67)    | 3.34(2.91,3.76)    | 2.02(1.82,2.21) | 5  |
| 75-79 years | 5,937(4,569-7,634)    | 13 | 9,487(7,278-12,383)   | 13 | 0.18(-0.06,0.42)   | 2.19(1.89,2.48)    | 2.58(2.41,2.75)    | 1.66(1.51,1.82) | 7  |
| 80-84 years | 3,363(2,583-4,316)    | 15 | 6,126(4,658-7,950)    | 15 | -0.49(-1.03,0.06)  | 4.15(3.92,4.38)    | 2.17(2.02,2.31)    | 2.03(1.83,2.22) | 4  |
| 85-90 years | 1,477(1,126-1,920)    | 17 | 3,175(2,412-4,155)    | 16 | 1.93(1.65,2.22)    | 3.40(3.15,3.65)    | 2.82(2.59,3.05)    | 2.74(2.58,2.91) | 3  |
| 90-94 years | 477(354-625)          | 18 | 1,349(996-1,781)      | 18 | 3.41(2.79,4.04)    | 2.72(2.56,2.88)    | 4.64(3.96,5.33)    | 3.64(3.33,3.95) | 2  |
| 95+ years   | 128(90-174)           | 20 | 429(301-596)          | 19 | 4.04(3.24,4.85)    | 4.82(4.34,5.31)    | 3.85(3.56,4.14)    | 4.16(3.80,4.52) | 1  |

**Multiple sclerosis**

|             |                     |    |                      |    |                 |                    |                    |                 |    |
|-------------|---------------------|----|----------------------|----|-----------------|--------------------|--------------------|-----------------|----|
| <5 years    | 0(0-0)              | 20 | 0(0-0)               | 20 |                 |                    |                    |                 |    |
| 5- 9 years  | 277(102-573)        | 14 | 310(114-642)         | 15 | 0.37(0.28,0.46) | 0.17(0.11,0.22)    | 0.64(0.50,0.78)    | 0.38(0.32,0.44) | 19 |
| 10-14 years | 1,296(685-2,135)    | 9  | 1,524(826-2,462)     | 10 | 1.08(1.03,1.12) | -0.20(-0.28,-0.12) | 0.78(0.69,0.88)    | 0.57(0.52,0.62) | 18 |
| 15-19 years | 3,087(1,954-4,626)  | 6  | 3,720(2,439-5,428)   | 7  | 1.11(0.84,1.39) | 0.77(0.67,0.86)    | 0.07(-0.13,0.27)   | 0.65(0.53,0.77) | 17 |
| 20-24 years | 5,702(3,493-8,985)  | 3  | 7,316(4,671-11,144)  | 4  | 0.92(0.82,1.03) | 1.54(1.45,1.63)    | -0.15(-0.24,-0.05) | 0.82(0.76,0.89) | 16 |
| 25-29 years | 7,560(5,042-10,406) | 1  | 10,186(6,816-13,757) | 1  | 0.80(0.72,0.89) | 1.64(1.36,1.92)    | 0.78(0.48,1.09)    | 1.07(0.94,1.21) | 15 |
| 30-34 years | 7,110(4,404-10,066) | 2  | 10,005(6,266-13,848) | 2  | 0.95(0.85,1.06) | 0.89(0.85,0.93)    | 1.65(1.53,1.78)    | 1.19(1.13,1.25) | 14 |
| 35-39 years | 5,674(3,560-7,799)  | 4  | 8,116(5,212-11,099)  | 3  | 1.41(1.22,1.59) | 0.84(0.79,0.88)    | 1.62(1.53,1.72)    | 1.26(1.19,1.32) | 12 |
| 40-44 years | 4,045(2,373-5,744)  | 5  | 5,857(3,447-8,268)   | 5  | 1.35(1.26,1.45) | 1.50(1.38,1.63)    | 0.86(0.81,0.91)    | 1.25(1.19,1.31) | 13 |
| 45-49 years | 2,647(1,735-3,816)  | 7  | 4,394(2,846-6,398)   | 6  | 2.43(2.22,2.64) | 1.93(1.89,1.96)    | 1.02(0.96,1.09)    | 1.80(1.73,1.87) | 10 |
| 50-54 years | 1,840(1,015-2,906)  | 8  | 2,978(1,605-4,790)   | 8  | 0.47(0.21,0.73) | 2.38(2.27,2.49)    | 1.98(1.90,2.05)    | 1.69(1.57,1.81) | 11 |
| 55-59 years | 938(651-1,275)      | 10 | 1,637(1,116-2,240)   | 9  | 0.33(0.14,0.52) | 3.32(3.09,3.55)    | 2.41(2.33,2.48)    | 1.93(1.82,2.04) | 9  |
| 60-64 years | 537(352-690)        | 11 | 957(609-1,273)       | 11 | 0.82(0.75,0.89) | 2.03(1.88,2.17)    | 3.00(2.46,3.53)    | 1.99(1.80,2.18) | 8  |
| 65-69 years | 426(292-525)        | 12 | 815(543-1,037)       | 12 | 1.92(1.57,2.26) | 1.25(1.15,1.35)    | 4.00(3.75,4.26)    | 2.31(2.16,2.45) | 6  |
| 70-74 years | 297(196-375)        | 13 | 603(387-795)         | 13 | 3.16(3.03,3.29) | 1.96(1.88,2.04)    | 2.32(2.02,2.62)    | 2.44(2.34,2.55) | 5  |
| 75-79 years | 218(157-267)        | 15 | 419(299-530)         | 14 | 1.87(1.73,2.01) | 2.95(2.90,3.01)    | 1.81(1.66,1.96)    | 2.27(2.19,2.34) | 7  |

|             |             |    |              |    |                 |                 |                 |                 |   |
|-------------|-------------|----|--------------|----|-----------------|-----------------|-----------------|-----------------|---|
| 80-84 years | 126(97-152) | 16 | 286(220-350) | 16 | 1.19(0.91,1.47) | 4.43(4.31,4.55) | 2.79(2.69,2.90) | 2.85(2.75,2.95) | 4 |
| 85-90 years | 54(41-66)   | 17 | 149(112-181) | 17 | 3.06(2.86,3.26) | 3.45(3.23,3.67) | 4.08(3.84,4.31) | 3.51(3.37,3.65) | 3 |
| 90-94 years | 16(11-20)   | 18 | 57(39-72)    | 18 | 4.74(4.52,4.97) | 3.01(2.65,3.38) | 5.94(5.80,6.08) | 4.57(4.43,4.72) | 2 |
| 95+ years   | 4(2-5)      | 19 | 16(10-21)    | 19 | 5.49(5.40,5.57) | 5.23(5.09,5.37) | 5.07(4.73,5.41) | 5.27(5.14,5.39) | 1 |

**Rheumatoid arthritis**

|             |                       |    |                         |    |                 |                   |                   |                 |    |
|-------------|-----------------------|----|-------------------------|----|-----------------|-------------------|-------------------|-----------------|----|
| <5 years    | 0(0-0)                | 20 | 0(0-0)                  | 20 |                 |                   |                   |                 |    |
| 5- 9 years  | 6,185(3,629-9,718)    | 15 | 7,005(4,115-11,093)     | 16 | 0.73(0.62,0.83) | 0.32(0.24,0.40)   | 0.20(0.06,0.34)   | 0.40(0.33,0.48) | 19 |
| 10-14 years | 16,925(12,632-21,811) | 13 | 21,202(15,766-27,497)   | 14 | 1.86(1.62,2.10) | -0.05(-0.23,0.14) | 0.43(0.35,0.51)   | 0.78(0.68,0.88) | 18 |
| 15-19 years | 26,867(18,936-37,774) | 11 | 34,799(24,516-49,150)   | 12 | 1.34(1.21,1.47) | 1.22(1.11,1.34)   | 0.09(-0.01,0.19)  | 0.89(0.82,0.97) | 17 |
| 20-24 years | 33,294(25,224-43,122) | 10 | 44,708(33,845-58,270)   | 11 | 0.79(0.68,0.90) | 2.38(2.25,2.51)   | -0.38(-0.82,0.07) | 0.97(0.82,1.12) | 16 |
| 25-29 years | 35,526(23,890-47,556) | 9  | 52,549(35,159-70,334)   | 10 | 1.53(1.36,1.70) | 1.45(1.38,1.52)   | 0.88(0.70,1.05)   | 1.31(1.23,1.40) | 15 |
| 30-34 years | 39,592(29,944-50,730) | 8  | 66,206(49,617-85,382)   | 8  | 2.73(2.51,2.96) | 0.88(0.62,1.14)   | 1.89(1.74,2.04)   | 1.82(1.68,1.97) | 13 |
| 35-39 years | 47,803(33,216-64,001) | 6  | 78,205(54,040-105,229)  | 7  | 2.19(1.97,2.42) | 1.72(1.42,2.03)   | 0.85(0.74,0.96)   | 1.63(1.49,1.77) | 14 |
| 40-44 years | 50,592(38,447-63,827) | 5  | 92,256(69,396-117,397)  | 6  | 2.90(2.38,3.42) | 3.19(2.77,3.61)   | 0.45(0.17,0.73)   | 2.09(1.83,2.36) | 12 |
| 45-49 years | 52,052(37,360-70,443) | 4  | 112,381(79,898-151,949) | 4  | 4.11(3.94,4.28) | 2.42(2.11,2.73)   | 1.39(1.14,1.64)   | 2.72(2.57,2.87) | 9  |
| 50-54 years | 56,036(43,129-70,068) | 2  | 123,281(94,137-155,551) | 1  | 2.50(2.02,2.97) | 3.27(3.03,3.50)   | 2.52(2.36,2.67)   | 2.82(2.60,3.04) | 7  |
| 55-59 years | 56,690(39,843-75,111) | 1  | 119,568(83,690-159,428) | 2  | 1.54(1.37,1.71) | 4.35(4.17,4.52)   | 1.89(1.34,2.44)   | 2.61(2.42,2.80) | 10 |
| 60-64 years | 55,664(41,327-71,295) | 3  | 116,326(86,251-150,255) | 3  | 1.97(1.94,2.00) | 2.99(2.91,3.08)   | 2.49(2.28,2.69)   | 2.55(2.48,2.63) | 11 |
| 65-69 years | 44,216(32,696-56,814) | 7  | 99,235(73,056-127,372)  | 5  | 2.38(2.30,2.45) | 2.27(2.25,2.30)   | 3.96(3.82,4.10)   | 2.83(2.77,2.88) | 6  |
| 70-74 years | 25,888(18,503-34,345) | 12 | 60,322(42,470-80,450)   | 9  | 3.05(2.96,3.15) | 2.55(2.52,2.58)   | 3.38(3.23,3.53)   | 2.96(2.91,3.02) | 4  |
| 75-79 years | 13,003(10,704-15,398) | 14 | 28,590(23,349-34,209)   | 13 | 2.44(2.28,2.60) | 2.89(2.79,3.00)   | 2.74(2.68,2.81)   | 2.74(2.67,2.80) | 8  |
| 80-84 years | 5,233(4,042-6,613)    | 16 | 12,245(9,345-15,673)    | 15 | 1.75(1.61,1.88) | 3.75(3.65,3.86)   | 3.14(2.77,3.52)   | 2.94(2.81,3.07) | 5  |
| 85-90 years | 1,597(1,235-2,022)    | 17 | 4,427(3,381-5,654)      | 17 | 3.86(3.75,3.98) | 3.27(3.05,3.48)   | 3.67(3.56,3.79)   | 3.56(3.47,3.66) | 3  |
| 90-94 years | 281(218-354)          | 18 | 1,013(775-1,289)        | 18 | 5.41(5.23,5.58) | 2.98(2.85,3.12)   | 5.05(4.96,5.15)   | 4.51(4.43,4.59) | 2  |
| 95+ years   | 17(13-21)             | 19 | 73(56-93)               | 19 | 6.46(6.27,6.65) | 5.10(4.91,5.29)   | 3.91(3.09,4.73)   | 5.19(4.92,5.47) | 1  |

**Psoriasis**

|             |                          |    |                          |    |                    |                    |                    |                    |    |
|-------------|--------------------------|----|--------------------------|----|--------------------|--------------------|--------------------|--------------------|----|
| <5 years    | 220,212(199,004-240,311) | 12 | 195,900(176,999-213,529) | 14 | -0.47(-0.65,-0.29) | -0.38(-0.41,-0.34) | -0.34(-0.37,-0.31) | -0.40(-0.45,-0.34) | 20 |
| 5- 9 years  | 244,422(216,269-272,185) | 9  | 224,918(197,971-250,738) | 13 | 0.04(-0.06,0.14)   | -0.70(-0.75,-0.64) | -0.11(-0.15,-0.06) | -0.28(-0.32,-0.23) | 19 |
| 10-14 years | 232,271(202,318-263,608) | 10 | 225,277(195,665-256,049) | 12 | 1.06(1.01,1.10)    | -1.26(-1.32,-1.20) | -0.16(-0.29,-0.03) | -0.09(-0.14,-0.04) | 16 |
| 15-19 years | 245,082(211,500-278,449) | 8  | 229,544(198,573-261,516) | 11 | 0.09(-0.03,0.20)   | 0.11(0.03,0.19)    | -0.87(-0.97,-0.77) | -0.23(-0.30,-0.17) | 18 |
| 20-24 years | 274,187(236,758-315,552) | 5  | 263,679(227,069-304,388) | 9  | -0.55(-0.76,-0.34) | 1.23(1.15,1.31)    | -1.20(-1.29,-1.12) | -0.15(-0.23,-0.08) | 17 |
| 25-29 years | 306,869(268,611-351,779) | 3  | 329,019(287,837-377,490) | 7  | 0.28(0.16,0.40)    | 0.22(0.17,0.27)    | 0.18(0.06,0.31)    | 0.23(0.17,0.29)    | 15 |
| 30-34 years | 310,175(270,601-352,324) | 2  | 377,898(329,625-428,804) | 5  | 1.69(1.55,1.83)    | -0.39(-0.55,-0.24) | 1.04(0.93,1.16)    | 0.71(0.62,0.79)    | 13 |
| 35-39 years | 323,456(283,337-366,168) | 1  | 384,945(337,243-436,008) | 4  | 1.23(1.01,1.45)    | 0.45(0.33,0.57)    | -0.05(-0.34,0.25)  | 0.57(0.43,0.71)    | 14 |
| 40-44 years | 292,067(254,845-329,721) | 4  | 387,668(338,659-436,174) | 3  | 1.85(1.55,2.16)    | 1.92(1.66,2.19)    | -0.57(-0.71,-0.43) | 0.98(0.82,1.13)    | 12 |
| 45-49 years | 252,758(220,720-287,012) | 7  | 407,782(355,091-463,612) | 2  | 3.28(3.08,3.47)    | 1.27(1.02,1.52)    | 0.60(0.35,0.85)    | 1.71(1.56,1.87)    | 9  |
| 50-54 years | 254,805(222,877-290,379) | 6  | 420,014(366,360-479,954) | 1  | 1.35(1.02,1.69)    | 2.01(1.72,2.29)    | 1.94(1.68,2.21)    | 1.81(1.62,2.01)    | 8  |
| 55-59 years | 226,007(198,693-255,828) | 11 | 370,094(325,853-418,393) | 6  | 0.56(0.20,0.92)    | 3.17(2.82,3.51)    | 1.49(1.35,1.63)    | 1.67(1.49,1.85)    | 10 |

|                                 |                                |    |                                |    |                    |                    |                    |                  |    |
|---------------------------------|--------------------------------|----|--------------------------------|----|--------------------|--------------------|--------------------|------------------|----|
| 60-64 years                     | 192,952(168,294-218,675)       | 13 | 304,459(266,203-345,872)       | 8  | 0.60(0.54,0.66)    | 1.86(1.69,2.02)    | 2.14(1.77,2.51)    | 1.60(1.45,1.74)  | 11 |
| 65-69 years                     | 140,387(122,032-158,586)       | 14 | 237,012(206,877-267,873)       | 10 | 1.25(1.01,1.49)    | 0.96(0.89,1.03)    | 3.47(3.06,3.88)    | 1.82(1.67,1.97)  | 7  |
| 70-74 years                     | 74,746(64,464-85,180)          | 15 | 141,995(122,359-161,577)       | 15 | 3.01(2.79,3.24)    | 1.37(1.30,1.44)    | 2.42(2.18,2.66)    | 2.23(2.11,2.34)  | 5  |
| 75-79 years                     | 39,974(34,196-46,123)          | 16 | 70,252(60,382-80,878)          | 16 | 1.69(1.43,1.95)    | 2.30(2.22,2.38)    | 1.62(1.40,1.84)    | 1.96(1.84,2.08)  | 6  |
| 80-84 years                     | 16,265(13,835-18,863)          | 17 | 33,605(28,611-39,109)          | 17 | 0.53(0.24,0.82)    | 4.12(3.97,4.26)    | 2.68(2.62,2.74)    | 2.54(2.43,2.65)  | 4  |
| 85-90 years                     | 5,077(4,299-5,937)             | 18 | 12,967(10,954-15,102)          | 18 | 3.35(3.19,3.51)    | 3.36(2.99,3.73)    | 3.51(3.38,3.65)    | 3.28(3.14,3.43)  | 3  |
| 90-94 years                     | 1,251(1,044-1,462)             | 19 | 4,341(3,628-5,067)             | 19 | 4.92(4.71,5.12)    | 2.25(1.83,2.67)    | 5.48(4.86,6.10)    | 4.31(4.05,4.58)  | 2  |
| 95+ years                       | 275(220-335)                   | 20 | 1,225(977-1,503)               | 20 | 6.21(6.05,6.38)    | 5.48(5.14,5.82)    | 4.47(3.72,5.24)    | 5.41(5.13,5.68)  | 1  |
| <b><i>Atopic dermatitis</i></b> |                                |    |                                |    |                    |                    |                    |                  |    |
| <5 years                        | 6,281,045(5,684,074-6,924,202) | 1  | 6,346,386(5,750,027-6,989,495) | 1  | -0.35(-0.42,-0.29) | 0.18(0.09,0.28)    | 0.18(0.10,0.25)    | 0.02(-0.03,0.07) | 20 |
| 5- 9 years                      | 2,663,303(2,293,129-3,100,679) | 2  | 2,914,836(2,508,482-3,384,640) | 2  | 0.54(0.50,0.58)    | 0.21(0.18,0.23)    | 0.20(0.17,0.23)    | 0.30(0.28,0.32)  | 18 |
| 10-14 years                     | 1,475,014(1,227,276-1,750,315) | 3  | 1,744,755(1,445,179-2,059,889) | 3  | 1.68(1.63,1.73)    | -0.36(-0.43,-0.28) | 0.37(0.32,0.41)    | 0.59(0.56,0.62)  | 16 |
| 15-19 years                     | 1,298,070(1,087,081-1,523,209) | 5  | 1,418,726(1,167,003-1,677,468) | 4  | 0.62(0.51,0.72)    | 0.66(0.61,0.72)    | -0.38(-0.49,-0.27) | 0.31(0.26,0.37)  | 17 |
| 20-24 years                     | 1,309,818(1,106,789-1,528,558) | 4  | 1,355,849(1,131,386-1,599,689) | 6  | -0.39(-0.50,-0.28) | 1.96(1.60,2.32)    | -1.54(-1.68,-1.41) | 0.07(-0.06,0.19) | 19 |
| 25-29 years                     | 1,135,950(944,382-1,333,009)   | 6  | 1,379,234(1,132,493-1,615,384) | 5  | 1.08(0.80,1.36)    | 0.24(0.14,0.35)    | 0.64(0.33,0.95)    | 0.67(0.52,0.82)  | 15 |
| 30-34 years                     | 883,582(731,188-1,040,370)     | 7  | 1,294,847(1,067,620-1,530,099) | 7  | 3.21(2.93,3.48)    | -0.40(-0.75,-0.05) | 1.72(1.46,1.97)    | 1.38(1.18,1.58)  | 13 |
| 35-39 years                     | 757,269(622,755-898,719)       | 8  | 1,051,673(857,530-1,255,548)   | 9  | 1.82(1.46,2.17)    | 1.08(0.89,1.27)    | 0.18(-0.31,0.66)   | 1.07(0.85,1.30)  | 14 |
| 40-44 years                     | 594,589(501,512-694,034)       | 9  | 977,332(818,357-1,143,108)     | 11 | 2.88(2.53,3.23)    | 3.00(2.68,3.31)    | -0.21(-0.37,-0.05) | 1.76(1.57,1.94)  | 12 |
| 45-49 years                     | 489,857(401,445-571,732)       | 11 | 1,021,178(833,167-1,198,603)   | 10 | 4.28(4.16,4.41)    | 1.94(1.61,2.28)    | 1.39(1.19,1.60)    | 2.65(2.50,2.79)  | 7  |
| 50-54 years                     | 494,211(410,748-586,461)       | 10 | 1,080,021(898,186-1,276,234)   | 8  | 2.24(1.79,2.69)    | 3.00(2.59,3.40)    | 3.39(3.03,3.75)    | 2.84(2.56,3.11)  | 5  |
| 55-59 years                     | 460,737(388,978-536,282)       | 12 | 946,557(801,248-1,102,558)     | 12 | 1.10(0.98,1.23)    | 4.33(4.16,4.50)    | 1.97(1.53,2.42)    | 2.49(2.33,2.65)  | 10 |
| 60-64 years                     | 401,677(334,211-467,575)       | 13 | 801,090(664,259-931,599)       | 13 | 1.59(1.46,1.72)    | 2.37(2.09,2.66)    | 3.19(2.96,3.43)    | 2.43(2.31,2.56)  | 11 |
| 65-69 years                     | 333,833(279,642-392,691)       | 14 | 704,029(588,338-816,887)       | 14 | 2.15(1.99,2.32)    | 1.47(1.39,1.56)    | 4.44(4.05,4.82)    | 2.60(2.46,2.73)  | 8  |
| 70-74 years                     | 245,106(207,008-285,198)       | 15 | 539,189(453,753-623,657)       | 15 | 3.59(3.32,3.85)    | 1.76(1.70,1.82)    | 3.00(2.76,3.24)    | 2.75(2.63,2.87)  | 6  |
| 75-79 years                     | 184,204(154,522-216,480)       | 16 | 379,496(318,809-443,836)       | 16 | 2.52(2.35,2.68)    | 2.81(2.75,2.87)    | 2.00(1.89,2.11)    | 2.52(2.44,2.59)  | 9  |
| 80-84 years                     | 109,412(90,502-129,555)        | 17 | 264,211(220,401-311,328)       | 17 | 1.81(1.48,2.14)    | 4.29(4.14,4.44)    | 3.07(3.00,3.14)    | 3.12(3.00,3.24)  | 4  |
| 85-90 years                     | 50,398(43,030-58,788)          | 18 | 148,457(127,316-172,375)       | 18 | 3.91(3.78,4.04)    | 3.70(3.46,3.94)    | 3.84(3.72,3.97)    | 3.79(3.69,3.90)  | 3  |
| 90-94 years                     | 15,442(13,075-18,099)          | 19 | 60,293(50,818-70,403)          | 19 | 5.37(5.05,5.70)    | 3.37(2.94,3.80)    | 5.77(5.56,5.97)    | 4.86(4.67,5.05)  | 2  |
| 95+ years                       | 3,643(2,639-4,770)             | 20 | 17,860(12,757-23,533)          | 20 | 6.26(6.18,6.33)    | 5.79(5.61,5.97)    | 5.01(4.65,5.37)    | 5.70(5.56,5.83)  | 1  |



**sTable 3.** The incident cases and age-standardized rate of incidence attributable to overall immune mediated inflammatory diseases according to 204 countries and territories and its temporal trends from 1990 to 2019

|                                       | 1990                        |      | 2019                        |      | 1990-1999          | 2000-2009          | 2010-2019          | 1990-2019          |      |
|---------------------------------------|-----------------------------|------|-----------------------------|------|--------------------|--------------------|--------------------|--------------------|------|
|                                       | N(95%CI)                    | Rank | N(95%CI)                    | Rank | AAPC(95%CI)        | AAPC(95%CI)        | AAPC(95%CI)        | AAPC(95%CI)        | Rank |
| <b>Age standardized rate</b>          |                             |      |                             |      |                    |                    |                    |                    |      |
| China                                 | 885.33(766.00-1,039.30)     | 150  | 835.34(719.22-992.26)       | 141  | -1.15(-1.27,-1.04) | -0.80(-0.94,-0.66) | 1.21(-0.34,2.79)   | -0.26(-0.75,0.24)  | 112  |
| Democratic People's Republic of Korea | 1,099.92(948.88-1,280.90)   | 94   | 1,068.49(927.62-1,236.72)   | 82   | 0.31(0.02,0.60)    | -0.33(-0.37,-0.30) | -0.24(-0.26,-0.21) | -0.11(-0.21,-0.02) | 78   |
| Taiwan (Province of China)            | 1,176.56(1,023.32-1,367.21) | 66   | 1,135.56(969.86-1,362.88)   | 55   | 0.55(0.17,0.94)    | 0.11(-0.40,0.63)   | -1.21(-1.45,-0.97) | -0.23(-0.45,-0.01) | 108  |
| Cambodia                              | 932.57(825.41-1,055.98)     | 133  | 958.14(838.90-1,104.82)     | 109  | -0.34(-0.40,-0.28) | 0.15(0.06,0.24)    | 0.56(0.46,0.66)    | 0.12(0.07,0.17)    | 17   |
| Indonesia                             | 1,167.81(1,037.36-1,326.19) | 70   | 1,128.38(994.17-1,290.41)   | 59   | -0.65(-0.74,-0.56) | 0.37(0.25,0.49)    | -0.16(-0.47,0.14)  | -0.14(-0.25,-0.04) | 85   |
| Lao People's Democratic Republic      | 969.43(863.13-1,092.68)     | 124  | 910.17(811.20-1,030.84)     | 117  | -0.34(-0.38,-0.31) | -0.30(-0.32,-0.28) | 0.01(-0.03,0.05)   | -0.22(-0.24,-0.20) | 102  |
| Malaysia                              | 1,017.25(906.09-1,147.79)   | 115  | 961.48(834.27-1,132.70)     | 108  | -0.35(-0.41,-0.29) | -0.05(-0.28,0.18)  | -0.19(-0.48,0.10)  | -0.22(-0.34,-0.09) | 103  |
| Maldives                              | 1,134.53(990.61-1,313.25)   | 79   | 926.34(793.53-1,087.94)     | 115  | -0.74(-0.79,-0.69) | -1.00(-1.02,-0.97) | -0.25(-0.31,-0.19) | -0.69(-0.72,-0.66) | 194  |
| Myanmar                               | 933.48(844.13-1,037.15)     | 132  | 906.45(817.29-1,015.91)     | 119  | -0.28(-0.30,-0.26) | -0.17(-0.18,-0.16) | 0.17(0.15,0.20)    | -0.10(-0.11,-0.09) | 70   |
| Philippines                           | 1,453.40(1,245.55-1,732.66) | 14   | 1,286.24(1,111.69-1,518.09) | 20   | -0.70(-0.74,-0.67) | -0.31(-0.32,-0.30) | -0.22(-0.26,-0.18) | -0.42(-0.44,-0.40) | 160  |
| Sri Lanka                             | 1,058.39(942.39-1,186.47)   | 105  | 1,075.34(951.30-1,227.65)   | 79   | 0.18(0.16,0.19)    | -0.03(-0.07,0.00)  | 0.03(-0.01,0.06)   | 0.05(0.03,0.07)    | 27   |
| Thailand                              | 1,106.99(982.09-1,259.73)   | 92   | 1,077.90(928.09-1,265.20)   | 78   | -0.04(-0.10,0.01)  | -0.60(-0.82,-0.37) | 0.54(0.15,0.94)    | -0.09(-0.25,0.06)  | 65   |
| Timor-Leste                           | 1,066.37(937.16-1,218.69)   | 102  | 1,023.55(902.02-1,169.32)   | 99   | -0.28(-0.33,-0.24) | -0.27(-0.29,-0.24) | 0.17(0.13,0.22)    | -0.14(-0.16,-0.11) | 86   |
| Viet Nam                              | 973.03(857.33-1,115.70)     | 123  | 1,025.03(897.62-1,187.94)   | 97   | 0.45(0.29,0.61)    | -0.27(-0.43,-0.11) | 0.39(0.28,0.51)    | 0.18(0.09,0.27)    | 6    |
| Fiji                                  | 1,241.28(1,101.15-1,395.78) | 47   | 1,065.15(940.49-1,215.33)   | 84   | -0.39(-0.45,-0.32) | -1.02(-1.07,-0.96) | -0.15(-0.26,-0.04) | -0.53(-0.58,-0.49) | 181  |
| Kiribati                              | 1,420.38(1,255.15-1,598.83) | 18   | 1,230.12(1,096.92-1,380.69) | 33   | -0.33(-0.35,-0.30) | -0.68(-0.69,-0.67) | -0.44(-0.47,-0.42) | -0.49(-0.51,-0.48) | 175  |
| Marshall Islands                      | 1,130.82(1,003.94-1,271.05) | 81   | 1,037.11(897.95-1,196.29)   | 92   | -0.74(-1.00,-0.47) | -0.57(-0.62,-0.53) | 0.63(0.40,0.86)    | -0.25(-0.37,-0.14) | 111  |
| Micronesia (Federated States of)      | 1,122.47(988.17-1,264.60)   | 83   | 1,053.36(901.08-1,222.85)   | 89   | -0.56(-0.59,-0.54) | -0.56(-0.59,-0.54) | 0.64(0.03,1.27)    | -0.19(-0.38,0.00)  | 99   |
| Papua New Guinea                      | 1,380.22(1,214.53-1,550.26) | 23   | 1,233.24(1,097.47-1,382.15) | 32   | -0.04(-0.07,-0.01) | -0.70(-0.76,-0.63) | -0.44(-0.47,-0.41) | -0.40(-0.43,-0.37) | 158  |
| Samoa                                 | 1,080.31(944.20-1,234.84)   | 99   | 1,024.84(881.68-1,196.60)   | 98   | -0.52(-0.54,-0.49) | -0.36(-0.36,-0.35) | 0.41(0.33,0.48)    | -0.17(-0.20,-0.15) | 90   |
| Solomon Islands                       | 1,129.09(988.04-1,278.85)   | 82   | 1,100.59(952.58-1,282.07)   | 70   | -0.47(-0.88,-0.06) | -0.46(-0.56,-0.36) | 0.92(0.68,1.16)    | -0.04(-0.19,0.12)  | 52   |
| Tonga                                 | 1,217.82(1,053.90-1,427.41) | 55   | 1,130.65(963.45-1,328.99)   | 56   | -0.31(-0.57,-0.05) | -0.73(-0.82,-0.64) | 0.40(0.22,0.58)    | -0.22(-0.34,-0.11) | 104  |
| Vanuatu                               | 1,084.97(953.95-1,226.48)   | 98   | 1,057.55(877.28-1,252.91)   | 86   | -0.66(-0.71,-0.62) | -0.66(-0.71,-0.62) | 1.44(0.46,2.44)    | -0.02(-0.32,0.29)  | 45   |
| Armenia                               | 1,032.17(875.95-1,216.66)   | 111  | 1,034.67(864.38-1,229.92)   | 93   | -0.20(-0.27,-0.13) | -0.03(-0.04,-0.01) | 0.29(0.24,0.35)    | 0.02(-0.01,0.05)   | 32   |
| Azerbaijan                            | 1,048.62(896.28-1,233.87)   | 107  | 1,023.12(866.40-1,210.69)   | 100  | -0.26(-0.29,-0.23) | -0.20(-0.24,-0.16) | 0.29(0.16,0.42)    | -0.06(-0.11,0.00)  | 59   |
| Georgia                               | 1,040.41(900.02-1,214.18)   | 109  | 1,019.87(855.18-1,217.02)   | 101  | -0.33(-0.38,-0.27) | 0.10(-0.18,0.39)   | 0.06(-0.06,0.17)   | -0.06(-0.16,0.04)  | 60   |
| Kazakhstan                            | 995.85(859.03-1,153.82)     | 117  | 995.24(851.94-1,163.41)     | 104  | -0.38(-0.44,-0.33) | -0.01(-0.03,0.01)  | 0.44(0.38,0.50)    | 0.02(-0.01,0.04)   | 33   |
| Kyrgyzstan                            | 1,188.53(1,023.45-1,392.98) | 62   | 1,098.41(926.53-1,304.71)   | 71   | -0.50(-0.58,-0.42) | -0.34(-0.37,-0.30) | 0.04(-0.08,0.15)   | -0.27(-0.32,-0.23) | 119  |
| Mongolia                              | 1,115.47(962.88-1,292.75)   | 86   | 1,057.50(899.64-1,244.44)   | 87   | -0.31(-0.35,-0.27) | -0.28(-0.29,-0.26) | 0.06(0.03,0.09)    | -0.18(-0.20,-0.16) | 94   |
| Tajikistan                            | 1,114.95(956.82-1,297.74)   | 87   | 1,080.92(916.92-1,273.14)   | 77   | -0.29(-0.41,-0.18) | -0.21(-0.23,-0.18) | 0.20(0.12,0.29)    | -0.10(-0.15,-0.05) | 71   |
| Turkmenistan                          | 1,133.49(977.33-1,327.81)   | 80   | 1,027.52(862.18-1,224.74)   | 96   | -0.67(-0.70,-0.63) | -0.57(-0.66,-0.48) | 0.28(0.21,0.35)    | -0.32(-0.36,-0.28) | 136  |
| Uzbekistan                            | 1,276.87(1,094.04-1,489.03) | 39   | 1,171.22(997.69-1,384.03)   | 45   | -0.17(-0.21,-0.14) | -0.68(-0.72,-0.64) | 0.00(-0.06,0.06)   | -0.31(-0.33,-0.28) | 133  |
| Albania                               | 713.88(626.23-834.75)       | 185  | 738.57(627.32-879.45)       | 168  | -0.41(-0.52,-0.31) | 0.58(0.39,0.76)    | 0.23(-0.26,0.73)   | 0.14(-0.04,0.31)   | 14   |

|                        |                             |     |                             |     |                    |                    |                    |                    |     |
|------------------------|-----------------------------|-----|-----------------------------|-----|--------------------|--------------------|--------------------|--------------------|-----|
| Bosnia and Herzegovina | 937.08(797.57-1,114.23)     | 131 | 924.14(774.65-1,114.69)     | 116 | -0.09(-0.17,-0.02) | -0.08(-0.23,0.08)  | 0.00(-0.02,0.02)   | -0.05(-0.11,0.01)  | 54  |
| Bulgaria               | 870.74(746.24-1,026.99)     | 153 | 816.38(679.02-978.62)       | 147 | -0.56(-0.80,-0.32) | -0.15(-0.23,-0.07) | 0.09(0.03,0.16)    | -0.22(-0.32,-0.12) | 105 |
| Croatia                | 988.97(837.75-1,169.13)     | 118 | 874.01(734.37-1,045.79)     | 128 | -0.63(-0.78,-0.47) | -0.60(-0.66,-0.54) | 0.09(-0.08,0.26)   | -0.42(-0.50,-0.34) | 161 |
| Czechia                | 759.41(638.87-906.92)       | 177 | 753.01(630.11-905.79)       | 165 | -0.30(-0.47,-0.14) | -0.08(-0.15,-0.02) | 0.46(0.32,0.60)    | 0.00(-0.08,0.08)   | 39  |
| Hungary                | 905.98(769.95-1,070.72)     | 143 | 844.57(709.83-1,008.97)     | 136 | -0.58(-0.86,-0.29) | 0.06(-0.26,0.38)   | -0.19(-0.36,-0.02) | -0.26(-0.41,-0.11) | 113 |
| North Macedonia        | 1,138.87(946.06-1,368.20)   | 78  | 989.27(844.99-1,168.83)     | 105 | -0.13(-0.35,0.08)  | -1.26(-1.50,-1.01) | -0.04(-0.09,0.01)  | -0.49(-0.60,-0.38) | 176 |
| Montenegro             | 783.89(654.30-940.01)       | 166 | 817.62(681.32-993.61)       | 146 | -0.16(-0.36,0.04)  | 0.07(0.02,0.11)    | 0.67(0.49,0.86)    | 0.18(0.10,0.27)    | 7   |
| Poland                 | 1,400.60(1,196.48-1,640.21) | 19  | 1,066.75(878.45-1,306.26)   | 83  | -0.77(-0.94,-0.59) | -1.49(-1.57,-1.41) | -0.59(-0.67,-0.51) | -0.98(-1.06,-0.91) | 201 |
| Romania                | 829.27(698.22-1,004.79)     | 160 | 823.90(676.57-1,005.77)     | 143 | 0.15(0.06,0.25)    | -0.13(-0.23,-0.03) | -0.03(-0.12,0.06)  | -0.02(-0.08,0.04)  | 46  |
| Serbia                 | 776.78(666.21-913.10)       | 169 | 736.50(621.50-877.51)       | 169 | -0.09(-0.13,-0.05) | -0.36(-0.38,-0.35) | -0.05(-0.09,0.00)  | -0.18(-0.20,-0.16) | 95  |
| Slovakia               | 748.73(635.21-888.20)       | 178 | 735.03(615.52-878.37)       | 171 | -0.26(-0.41,-0.12) | -0.01(-0.05,0.03)  | 0.18(0.05,0.30)    | -0.05(-0.12,0.02)  | 55  |
| Slovenia               | 1,044.30(892.95-1,231.17)   | 108 | 933.96(777.74-1,128.27)     | 111 | -0.43(-0.52,-0.33) | -0.54(-0.56,-0.52) | -0.10(-0.20,0.00)  | -0.37(-0.41,-0.33) | 150 |
| Belarus                | 973.88(819.22-1,156.26)     | 122 | 813.19(664.08-998.74)       | 148 | -0.79(-0.93,-0.65) | -1.25(-1.35,-1.14) | 0.37(0.18,0.56)    | -0.59(-0.68,-0.50) | 187 |
| Estonia                | 830.76(711.32-961.43)       | 159 | 754.90(627.10-901.28)       | 163 | -0.22(-0.29,-0.15) | -1.40(-1.59,-1.21) | 0.95(0.58,1.33)    | -0.30(-0.44,-0.16) | 128 |
| Latvia                 | 844.46(728.98-995.58)       | 155 | 734.71(591.82-905.12)       | 173 | -1.26(-1.31,-1.21) | 0.03(-0.09,0.15)   | -0.04(-0.14,0.07)  | -0.45(-0.51,-0.40) | 165 |
| Lithuania              | 765.10(653.18-898.11)       | 174 | 735.43(599.08-890.02)       | 170 | -0.91(-0.98,-0.83) | 0.54(0.31,0.76)    | 0.18(0.02,0.34)    | -0.10(-0.19,-0.01) | 72  |
| Republic of Moldova    | 817.52(687.58-986.41)       | 161 | 730.66(596.36-899.36)       | 176 | -0.49(-0.53,-0.45) | -0.71(-0.76,-0.65) | 0.11(0.02,0.19)    | -0.37(-0.41,-0.33) | 151 |
| Russian Federation     | 1,024.08(869.23-1,224.68)   | 114 | 795.83(658.56-961.28)       | 155 | -0.69(-0.80,-0.57) | -1.81(-1.92,-1.70) | 0.05(-0.17,0.27)   | -0.86(-0.95,-0.77) | 198 |
| Ukraine                | 982.98(796.50-1,195.29)     | 120 | 844.36(672.02-1,054.86)     | 137 | -0.66(-0.80,-0.51) | -1.18(-1.33,-1.03) | 0.49(0.27,0.72)    | -0.49(-0.60,-0.38) | 177 |
| Brunei Darussalam      | 1,191.79(1,030.46-1,390.85) | 61  | 1,145.03(986.93-1,337.80)   | 52  | 0.25(0.12,0.38)    | -0.43(-0.47,-0.39) | -0.20(-0.29,-0.11) | -0.15(-0.20,-0.10) | 87  |
| Japan                  | 1,614.93(1,396.77-1,896.75) | 8   | 1,241.81(1,054.64-1,475.33) | 31  | -1.23(-1.41,-1.06) | -1.98(-2.14,-1.81) | 0.56(0.44,0.69)    | -0.97(-1.06,-0.87) | 200 |
| Republic of Korea      | 1,118.48(978.01-1,290.74)   | 85  | 1,047.20(895.43-1,235.07)   | 90  | -0.50(-0.64,-0.36) | 0.02(-0.15,0.19)   | -0.17(-0.21,-0.14) | -0.26(-0.33,-0.18) | 114 |
| Singapore              | 1,183.74(1,021.46-1,365.44) | 64  | 985.96(828.17-1,184.04)     | 106 | -1.03(-1.11,-0.96) | -0.67(-0.72,-0.62) | -0.11(-0.14,-0.08) | -0.63(-0.66,-0.60) | 192 |
| Australia              | 1,281.61(1,079.48-1,493.79) | 37  | 1,129.09(949.19-1,341.98)   | 58  | 0.53(0.43,0.64)    | -1.94(-2.25,-1.63) | 0.05(-0.09,0.18)   | -0.46(-0.58,-0.35) | 168 |
| New Zealand            | 1,621.31(1,370.19-1,916.85) | 7   | 1,350.11(1,131.25-1,623.44) | 14  | -0.99(-1.10,-0.88) | -0.64(-0.72,-0.56) | -0.20(-0.24,-0.16) | -0.64(-0.69,-0.60) | 193 |
| Andorra                | 1,207.71(1,055.09-1,385.04) | 58  | 1,164.41(1,010.52-1,340.25) | 46  | -0.15(-0.17,-0.13) | -0.25(-0.26,-0.24) | 0.03(0.00,0.07)    | -0.12(-0.14,-0.11) | 79  |
| Austria                | 1,237.31(1,106.06-1,393.55) | 50  | 1,150.15(1,006.78-1,311.69) | 50  | -0.42(-0.52,-0.31) | -0.08(-0.15,-0.01) | -0.28(-0.35,-0.21) | -0.27(-0.32,-0.22) | 120 |
| Belgium                | 1,252.85(1,123.13-1,410.10) | 43  | 1,115.58(975.32-1,266.91)   | 62  | -1.17(-1.39,-0.94) | 0.32(0.18,0.46)    | -0.34(-0.45,-0.22) | -0.45(-0.55,-0.36) | 166 |
| Cyprus                 | 1,253.57(1,090.42-1,444.60) | 42  | 1,214.02(1,047.30-1,406.41) | 39  | -0.45(-0.53,-0.36) | -0.02(-0.04,-0.01) | 0.13(0.11,0.15)    | -0.10(-0.13,-0.07) | 73  |
| Denmark                | 1,341.27(1,183.76-1,532.24) | 27  | 1,251.08(1,082.77-1,444.89) | 29  | -0.34(-0.40,-0.28) | -0.12(-0.28,0.03)  | -0.38(-0.69,-0.08) | -0.27(-0.38,-0.16) | 121 |
| Finland                | 1,226.54(1,091.00-1,387.99) | 51  | 1,193.22(1,050.59-1,353.60) | 42  | 0.01(-0.01,0.03)   | -0.04(-0.09,0.00)  | -0.23(-0.26,-0.19) | -0.09(-0.11,-0.07) | 66  |
| France                 | 1,492.07(1,332.65-1,696.75) | 11  | 1,355.17(1,185.70-1,548.51) | 11  | -0.58(-0.63,-0.53) | -0.35(-0.45,-0.26) | -0.08(-0.28,0.11)  | -0.35(-0.42,-0.28) | 145 |
| Germany                | 1,208.39(1,074.29-1,353.27) | 57  | 1,045.66(910.66-1,197.48)   | 91  | -1.63(-1.74,-1.51) | 0.13(-0.02,0.28)   | -0.01(-0.32,0.30)  | -0.46(-0.58,-0.35) | 169 |
| Greece                 | 1,098.71(965.62-1,260.97)   | 95  | 1,074.41(928.00-1,237.89)   | 80  | -0.37(-0.47,-0.28) | 0.28(0.24,0.33)    | -0.18(-0.22,-0.14) | -0.08(-0.12,-0.05) | 63  |
| Iceland                | 1,624.88(1,389.11-1,894.08) | 6   | 1,450.20(1,243.88-1,700.39) | 4   | -0.28(-0.51,-0.04) | -0.77(-0.89,-0.65) | -0.14(-0.30,0.02)  | -0.39(-0.50,-0.28) | 156 |
| Ireland                | 1,420.80(1,252.76-1,615.07) | 17  | 1,245.90(1,085.04-1,424.30) | 30  | -0.57(-0.64,-0.49) | -0.33(-0.44,-0.22) | -0.56(-0.86,-0.25) | -0.48(-0.59,-0.38) | 173 |
| Israel                 | 1,204.39(1,062.03-1,368.96) | 59  | 1,114.24(971.02-1,270.24)   | 64  | -0.52(-0.57,-0.46) | -0.23(-0.25,-0.21) | 0.00(-0.03,0.04)   | -0.27(-0.29,-0.25) | 122 |
| Italy                  | 1,250.42(1,116.83-1,405.65) | 45  | 1,163.04(1,004.85-1,332.75) | 47  | -0.42(-0.68,-0.17) | -0.14(-0.63,0.35)  | -0.28(-0.48,-0.08) | -0.30(-0.49,-0.11) | 129 |

|                                  |                             |     |                             |     |                    |                    |                    |                    |     |
|----------------------------------|-----------------------------|-----|-----------------------------|-----|--------------------|--------------------|--------------------|--------------------|-----|
| Luxembourg                       | 1,341.65(1,166.29-1,571.04) | 26  | 1,217.03(1,055.67-1,396.37) | 36  | -0.17(-0.25,-0.08) | -0.56(-0.58,-0.54) | -0.29(-0.36,-0.22) | -0.35(-0.39,-0.32) | 146 |
| Malta                            | 1,329.63(1,183.03-1,500.60) | 28  | 1,223.01(1,063.49-1,402.79) | 34  | -0.42(-0.49,-0.35) | -0.24(-0.25,-0.22) | -0.18(-0.27,-0.08) | -0.29(-0.33,-0.26) | 124 |
| Netherlands                      | 1,077.54(972.27-1,198.03)   | 100 | 1,027.71(920.49-1,144.95)   | 95  | 0.00(-0.15,0.16)   | -0.56(-0.60,-0.51) | 0.18(0.13,0.22)    | -0.16(-0.21,-0.10) | 88  |
| Norway                           | 1,626.01(1,420.56-1,870.93) | 5   | 1,375.92(1,179.95-1,599.10) | 9   | -0.53(-0.61,-0.46) | -0.69(-0.78,-0.60) | -0.52(-0.81,-0.22) | -0.60(-0.72,-0.48) | 188 |
| Portugal                         | 1,435.49(1,267.36-1,649.16) | 16  | 1,332.76(1,156.18-1,530.66) | 17  | -0.71(-0.95,-0.46) | 0.64(0.50,0.78)    | -0.60(-0.71,-0.50) | -0.31(-0.41,-0.20) | 134 |
| Spain                            | 1,119.04(985.81-1,281.99)   | 84  | 1,125.86(979.83-1,296.43)   | 60  | -0.39(-0.43,-0.36) | 0.59(0.55,0.64)    | -0.18(-0.31,-0.04) | 0.02(-0.03,0.06)   | 34  |
| Sweden                           | 1,529.45(1,338.95-1,759.50) | 10  | 1,302.05(1,118.44-1,520.81) | 18  | -1.57(-1.64,-1.50) | -0.73(-0.87,-0.60) | 0.64(0.28,1.00)    | -0.58(-0.71,-0.46) | 186 |
| Switzerland                      | 1,311.29(1,149.64-1,498.92) | 29  | 1,209.06(1,051.21-1,400.62) | 41  | -0.33(-0.34,-0.31) | -0.49(-0.50,-0.48) | -0.02(-0.05,0.01)  | -0.28(-0.30,-0.27) | 123 |
| United Kingdom                   | 1,761.41(1,523.29-2,026.38) | 2   | 1,507.40(1,293.90-1,749.50) | 3   | -0.66(-1.17,-0.14) | -0.66(-0.74,-0.58) | -0.32(-0.80,0.15)  | -0.55(-0.78,-0.33) | 184 |
| Argentina                        | 1,285.81(1,121.73-1,491.97) | 36  | 1,300.65(1,103.18-1,545.49) | 19  | 0.14(0.09,0.19)    | 0.17(0.14,0.19)    | -0.18(-0.21,-0.14) | 0.03(0.01,0.05)    | 29  |
| Chile                            | 1,184.06(1,033.03-1,372.13) | 63  | 1,171.50(1,002.71-1,386.85) | 44  | 0.05(-0.01,0.11)   | -0.41(-0.48,-0.35) | 0.38(0.27,0.48)    | -0.01(-0.06,0.04)  | 44  |
| Uruguay                          | 1,277.09(1,106.20-1,488.07) | 38  | 1,210.32(1,031.86-1,432.73) | 40  | -0.36(-0.43,-0.29) | -0.25(-0.50,0.01)  | 0.03(-0.08,0.15)   | -0.21(-0.30,-0.11) | 101 |
| Canada                           | 1,246.44(1,053.58-1,489.75) | 46  | 1,181.52(990.31-1,411.66)   | 43  | 0.23(-0.10,0.55)   | 0.39(0.27,0.51)    | -0.83(-1.21,-0.45) | -0.12(-0.30,0.05)  | 80  |
| United States of America         | 1,886.73(1,532.77-2,353.14) | 1   | 1,988.77(1,669.58-2,365.69) | 1   | -1.99(-2.25,-1.72) | 1.47(1.32,1.63)    | 0.88(0.69,1.07)    | 0.22(0.08,0.35)    | 5   |
| Antigua and Barbuda              | 1,217.77(992.05-1,512.26)   | 56  | 1,258.20(1,012.24-1,543.43) | 26  | -0.05(-0.26,0.17)  | 0.00(-0.07,0.07)   | 0.50(0.33,0.66)    | 0.15(0.05,0.25)    | 12  |
| Bahamas                          | 1,222.72(999.74-1,511.82)   | 53  | 1,257.62(1,010.36-1,550.98) | 27  | 0.02(-0.18,0.22)   | -0.07(-0.13,-0.01) | 0.44(0.30,0.58)    | 0.13(0.05,0.22)    | 15  |
| Barbados                         | 1,295.19(1,081.77-1,563.47) | 35  | 1,372.22(1,112.34-1,689.18) | 10  | 0.07(0.02,0.12)    | 0.56(0.46,0.65)    | -0.12(-0.37,0.12)  | 0.18(0.10,0.27)    | 8   |
| Belize                           | 1,299.92(1,065.66-1,572.10) | 33  | 1,251.78(1,012.05-1,529.42) | 28  | -0.08(-0.37,0.21)  | -0.31(-0.36,-0.26) | 0.16(-0.10,0.42)   | -0.09(-0.22,0.03)  | 67  |
| Cuba                             | 1,389.49(1,131.86-1,695.51) | 20  | 1,391.28(1,119.30-1,713.93) | 8   | 0.03(-0.02,0.08)   | -0.15(-0.26,-0.04) | 0.21(0.11,0.30)    | 0.03(-0.02,0.08)   | 30  |
| Dominica                         | 1,307.33(1,079.60-1,581.93) | 31  | 1,351.04(1,102.03-1,645.67) | 13  | 0.48(0.38,0.58)    | -0.01(-0.05,0.03)  | -0.08(-0.17,0.00)  | 0.13(0.08,0.18)    | 16  |
| Dominican Republic               | 1,054.09(878.98-1,248.08)   | 106 | 1,029.71(848.57-1,260.20)   | 94  | -1.05(-1.21,-0.88) | 0.55(0.41,0.70)    | 0.45(0.09,0.82)    | -0.02(-0.16,0.13)  | 47  |
| Grenada                          | 1,368.12(1,106.38-1,678.39) | 24  | 1,396.33(1,135.24-1,726.54) | 7   | 0.03(-0.01,0.07)   | -0.06(-0.08,-0.04) | 0.26(0.22,0.31)    | 0.07(0.05,0.09)    | 23  |
| Guyana                           | 1,305.84(1,084.63-1,566.48) | 32  | 1,282.56(1,054.65-1,559.92) | 22  | 0.16(0.04,0.28)    | -0.44(-0.48,-0.39) | 0.18(0.09,0.27)    | -0.05(-0.11,0.00)  | 56  |
| Haiti                            | 1,540.60(1,274.10-1,832.14) | 9   | 1,414.52(1,173.72-1,693.36) | 5   | -0.27(-0.32,-0.22) | -0.58(-0.61,-0.55) | 0.04(-0.02,0.09)   | -0.29(-0.32,-0.25) | 125 |
| Jamaica                          | 1,381.78(1,131.74-1,693.69) | 22  | 1,264.12(1,026.36-1,559.03) | 24  | -0.18(-0.31,-0.06) | -0.67(-0.70,-0.65) | 0.03(-0.33,0.39)   | -0.30(-0.42,-0.19) | 130 |
| Saint Lucia                      | 1,361.73(1,124.24-1,645.10) | 25  | 1,341.03(1,092.66-1,633.57) | 16  | 0.24(0.20,0.27)    | -0.42(-0.44,-0.40) | 0.09(-0.07,0.24)   | -0.06(-0.11,-0.01) | 61  |
| Saint Vincent and the Grenadines | 1,252.12(1,030.05-1,531.82) | 44  | 1,259.20(1,023.02-1,537.27) | 25  | -0.19(-0.31,-0.07) | -0.09(-0.17,0.00)  | 0.47(0.32,0.61)    | 0.05(-0.02,0.13)   | 28  |
| Suriname                         | 1,218.18(997.74-1,503.70)   | 54  | 1,220.75(987.85-1,506.62)   | 35  | -0.15(-0.16,-0.14) | -0.15(-0.16,-0.14) | 0.38(0.23,0.53)    | 0.02(-0.03,0.06)   | 35  |
| Trinidad and Tobago              | 1,065.57(883.46-1,293.29)   | 103 | 1,141.44(917.37-1,418.92)   | 53  | -0.12(-0.20,-0.03) | -0.12(-0.20,-0.03) | 1.52(1.00,2.04)    | 0.39(0.22,0.56)    | 2   |
| Bolivia (Plurinational State of) | 1,298.23(1,054.78-1,563.32) | 34  | 1,140.41(927.51-1,423.83)   | 54  | -0.61(-0.74,-0.48) | -0.73(-0.78,-0.67) | 0.15(0.03,0.28)    | -0.44(-0.50,-0.37) | 164 |
| Ecuador                          | 1,259.93(1,014.93-1,549.56) | 41  | 1,103.91(888.22-1,385.76)   | 68  | -1.05(-1.39,-0.70) | -0.67(-1.04,-0.30) | 0.53(0.44,0.61)    | -0.47(-0.65,-0.28) | 172 |
| Peru                             | 1,308.65(1,047.41-1,616.64) | 30  | 1,119.59(897.18-1,417.64)   | 61  | -0.56(-0.65,-0.47) | -1.49(-1.55,-1.42) | 0.46(0.30,0.61)    | -0.56(-0.63,-0.49) | 185 |
| Colombia                         | 1,012.33(828.08-1,236.65)   | 116 | 864.31(685.31-1,080.70)     | 131 | -1.27(-1.96,-0.58) | -0.49(-0.74,-0.24) | 0.26(0.17,0.36)    | -0.51(-0.75,-0.27) | 178 |
| Costa Rica                       | 1,226.03(995.21-1,496.04)   | 52  | 1,106.14(881.31-1,380.41)   | 67  | 0.63(0.50,0.76)    | -1.39(-1.88,-0.89) | -0.05(-0.24,0.15)  | -0.32(-0.50,-0.14) | 137 |
| El Salvador                      | 1,464.63(1,167.56-1,807.97) | 13  | 1,095.95(885.67-1,365.77)   | 73  | -1.11(-1.23,-0.99) | -1.51(-1.59,-1.43) | -0.24(-0.33,-0.15) | -1.02(-1.08,-0.95) | 203 |
| Guatemala                        | 1,111.09(896.70-1,341.52)   | 91  | 786.34(634.30-981.30)       | 161 | -1.54(-1.76,-1.32) | -1.84(-2.31,-1.37) | -0.25(-0.32,-0.19) | -1.24(-1.41,-1.06) | 204 |
| Honduras                         | 1,154.41(928.46-1,407.86)   | 76  | 929.04(752.18-1,150.73)     | 112 | -0.62(-1.01,-0.22) | -1.22(-1.28,-1.16) | -0.31(-0.47,-0.15) | -0.75(-0.89,-0.62) | 196 |
| Mexico                           | 881.22(724.18-1,086.79)     | 152 | 792.47(622.69-996.78)       | 159 | -1.35(-1.54,-1.16) | -0.39(-0.56,-0.21) | 0.80(0.74,0.85)    | -0.37(-0.46,-0.28) | 152 |

|                                    |                             |     |                             |     |                    |                    |                    |                    |     |
|------------------------------------|-----------------------------|-----|-----------------------------|-----|--------------------|--------------------|--------------------|--------------------|-----|
| Nicaragua                          | 1,171.69(945.34-1,451.31)   | 67  | 908.67(727.14-1,135.00)     | 118 | -1.17(-1.70,-0.64) | -0.95(-1.19,-0.70) | -0.53(-0.60,-0.46) | -0.90(-1.10,-0.71) | 199 |
| Panama                             | 1,111.18(906.85-1,349.14)   | 90  | 999.46(799.19-1,248.65)     | 103 | -0.21(-0.36,-0.07) | -0.61(-0.68,-0.54) | -0.21(-0.37,-0.05) | -0.37(-0.45,-0.29) | 153 |
| Venezuela (Bolivarian Republic of) | 1,027.74(831.01-1,267.84)   | 113 | 927.61(741.02-1,150.44)     | 114 | -0.38(-0.49,-0.28) | -0.61(-0.65,-0.57) | 0.06(-0.02,0.14)   | -0.36(-0.41,-0.31) | 147 |
| Brazil                             | 1,484.43(1,182.98-1,853.39) | 12  | 1,341.54(1,047.19-1,669.74) | 15  | -0.50(-0.68,-0.31) | -0.99(-1.07,-0.90) | 0.56(0.35,0.76)    | -0.36(-0.46,-0.26) | 148 |
| Paraguay                           | 1,238.66(1,008.41-1,525.94) | 48  | 1,351.08(1,079.05-1,684.92) | 12  | 0.26(0.25,0.28)    | 0.26(0.25,0.28)    | 0.44(0.34,0.55)    | 0.32(0.28,0.35)    | 4   |
| Algeria                            | 776.27(667.09-909.14)       | 170 | 793.16(660.57-953.54)       | 158 | -0.34(-0.42,-0.26) | 0.00(-0.23,0.23)   | 0.72(0.59,0.86)    | 0.10(0.01,0.19)    | 19  |
| Bahrain                            | 917.31(775.53-1,089.26)     | 141 | 839.44(696.27-1,009.49)     | 139 | -0.14(-0.22,-0.05) | -0.71(-0.74,-0.68) | -0.04(-0.10,0.03)  | -0.30(-0.34,-0.26) | 131 |
| Egypt                              | 776.05(648.60-929.24)       | 171 | 734.99(611.04-885.96)       | 172 | -0.56(-0.62,-0.51) | -0.41(-0.44,-0.39) | 0.51(0.45,0.57)    | -0.17(-0.20,-0.14) | 91  |
| Iran (Islamic Republic of)         | 924.91(780.70-1,094.00)     | 135 | 807.10(668.18-967.32)       | 152 | -0.18(-0.23,-0.12) | -0.98(-1.02,-0.93) | -0.18(-0.23,-0.14) | -0.48(-0.51,-0.45) | 174 |
| Iraq                               | 976.17(826.58-1,149.20)     | 121 | 818.72(680.39-993.40)       | 144 | -0.71(-0.72,-0.69) | -0.74(-0.75,-0.73) | -0.34(-0.36,-0.32) | -0.61(-0.62,-0.60) | 190 |
| Jordan                             | 898.88(751.56-1,081.48)     | 144 | 886.70(725.46-1,081.55)     | 124 | -0.03(-0.11,0.05)  | -0.27(-0.29,-0.24) | 0.21(0.13,0.30)    | -0.02(-0.06,0.02)  | 48  |
| Kuwait                             | 914.86(761.00-1,095.56)     | 142 | 891.52(718.43-1,098.30)     | 123 | -0.52(-0.55,-0.49) | 0.10(0.01,0.19)    | 0.11(-0.06,0.29)   | -0.09(-0.16,-0.03) | 68  |
| Lebanon                            | 930.34(790.13-1,109.13)     | 134 | 929.03(774.12-1,118.03)     | 113 | -0.10(-0.15,-0.06) | -0.14(-0.16,-0.11) | 0.29(0.23,0.36)    | 0.01(-0.02,0.04)   | 37  |
| Libya                              | 886.79(748.80-1,040.38)     | 149 | 841.78(703.40-997.40)       | 138 | -0.43(-0.53,-0.34) | -0.22(-0.26,-0.18) | 0.19(0.09,0.30)    | -0.17(-0.22,-0.12) | 92  |
| Morocco                            | 726.74(623.95-845.23)       | 183 | 749.30(634.97-892.56)       | 166 | -0.05(-0.09,0.00)  | -0.10(-0.12,-0.07) | 0.52(0.46,0.57)    | 0.11(0.08,0.14)    | 18  |
| Palestine                          | 836.95(708.93-989.60)       | 157 | 807.64(670.19-970.84)       | 151 | -0.73(-0.82,-0.63) | -0.10(-0.14,-0.06) | 0.55(0.44,0.65)    | -0.10(-0.15,-0.05) | 74  |
| Oman                               | 744.37(625.77-887.84)       | 179 | 861.41(706.54-1,049.20)     | 132 | -0.35(-0.44,-0.25) | 1.06(0.92,1.19)    | 0.98(0.57,1.40)    | 0.55(0.41,0.69)    | 1   |
| Qatar                              | 806.21(663.27-981.77)       | 164 | 797.03(655.43-970.45)       | 154 | 0.11(0.06,0.15)    | -0.53(-0.59,-0.47) | 0.38(0.15,0.60)    | -0.03(-0.11,0.04)  | 50  |
| Saudi Arabia                       | 642.65(550.32-748.72)       | 192 | 708.04(584.71-851.43)       | 178 | -0.25(-0.36,-0.14) | 0.67(0.50,0.84)    | 0.51(0.20,0.82)    | 0.34(0.22,0.46)    | 3   |
| Syrian Arab Republic               | 814.71(700.49-948.18)       | 162 | 805.98(683.88-948.69)       | 153 | -1.04(-1.21,-0.88) | 0.82(0.39,1.25)    | -0.24(-0.62,0.14)  | -0.10(-0.31,0.10)  | 75  |
| Tunisia                            | 832.99(715.45-984.38)       | 158 | 836.06(700.92-1,001.02)     | 140 | 0.02(-0.06,0.11)   | -0.26(-0.31,-0.21) | 0.30(0.23,0.37)    | 0.01(-0.03,0.06)   | 38  |
| Turkey                             | 1,146.72(986.32-1,326.49)   | 77  | 1,110.17(955.20-1,289.13)   | 65  | -0.03(-0.12,0.06)  | -1.09(-1.36,-0.82) | 1.09(0.97,1.22)    | -0.07(-0.18,0.04)  | 62  |
| United Arab Emirates               | 1,194.73(1,004.52-1,404.42) | 60  | 1,147.84(962.37-1,367.29)   | 51  | 0.06(-0.26,0.39)   | 1.27(-0.74,3.32)   | -2.32(-3.10,-1.53) | -0.32(-1.03,0.40)  | 138 |
| Yemen                              | 959.86(829.47-1,114.13)     | 126 | 869.61(730.61-1,029.28)     | 129 | -0.47(-0.52,-0.41) | -0.55(-0.59,-0.51) | 0.08(0.00,0.15)    | -0.33(-0.36,-0.29) | 142 |
| Afghanistan                        | 940.44(813.93-1,081.45)     | 129 | 904.04(776.96-1,055.49)     | 120 | -0.39(-0.46,-0.31) | -0.18(-0.20,-0.17) | 0.19(0.14,0.24)    | -0.13(-0.16,-0.10) | 83  |
| Bangladesh                         | 606.42(544.32-677.83)       | 197 | 547.00(489.69-616.13)       | 201 | -0.13(-0.24,-0.01) | -0.80(-0.86,-0.74) | -0.17(-0.23,-0.10) | -0.39(-0.44,-0.33) | 157 |
| Bhutan                             | 632.54(567.21-708.91)       | 193 | 555.11(497.92-625.52)       | 200 | -0.31(-0.36,-0.27) | -0.73(-0.76,-0.69) | -0.30(-0.37,-0.23) | -0.46(-0.49,-0.43) | 170 |
| India                              | 764.63(674.80-868.07)       | 175 | 700.39(617.67-793.96)       | 179 | -1.98(-2.54,-1.41) | 1.27(0.43,2.12)    | -0.38(-0.76,0.00)  | -0.38(-0.72,-0.03) | 155 |
| Nepal                              | 543.17(490.86-604.43)       | 202 | 511.02(458.42-572.95)       | 203 | -0.16(-0.21,-0.11) | -0.69(-0.80,-0.58) | 0.39(0.21,0.57)    | -0.18(-0.25,-0.11) | 96  |
| Pakistan                           | 657.47(586.93-737.66)       | 190 | 594.07(532.96-668.33)       | 195 | -0.07(-0.37,0.24)  | -0.70(-0.89,-0.51) | -0.19(-0.33,-0.05) | -0.29(-0.42,-0.16) | 126 |
| Angola                             | 918.57(780.94-1,080.59)     | 140 | 753.19(630.30-894.30)       | 164 | -0.34(-0.37,-0.31) | -1.09(-1.10,-1.08) | -0.60(-0.63,-0.57) | -0.69(-0.71,-0.67) | 195 |
| Central African Republic           | 887.09(759.86-1,040.92)     | 148 | 790.77(672.25-930.20)       | 160 | -0.38(-0.41,-0.35) | -0.45(-0.46,-0.44) | -0.35(-0.38,-0.33) | -0.40(-0.41,-0.39) | 159 |
| Congo                              | 882.30(744.40-1,045.20)     | 151 | 809.28(675.03-980.02)       | 150 | -0.29(-0.41,-0.17) | -0.61(-0.71,-0.50) | 0.03(-0.07,0.13)   | -0.32(-0.39,-0.25) | 139 |
| Democratic Republic of the Congo   | 781.18(660.34-920.00)       | 167 | 731.78(619.12-873.37)       | 174 | -0.40(-0.43,-0.38) | -0.22(-0.29,-0.15) | -0.01(-0.06,0.04)  | -0.22(-0.25,-0.20) | 106 |
| Equatorial Guinea                  | 857.94(723.81-1,000.52)     | 154 | 730.89(605.79-888.61)       | 175 | -0.67(-0.71,-0.63) | -1.07(-1.16,-0.98) | 0.19(0.05,0.32)    | -0.53(-0.58,-0.47) | 182 |
| Gabon                              | 772.67(650.14-911.93)       | 173 | 692.53(573.54-838.81)       | 181 | -0.66(-0.67,-0.65) | -0.63(-0.65,-0.62) | 0.24(0.10,0.39)    | -0.36(-0.41,-0.32) | 149 |
| Burundi                            | 1,028.23(860.16-1,228.71)   | 112 | 865.28(717.09-1,031.29)     | 130 | -0.66(-0.69,-0.63) | -0.57(-0.65,-0.48) | -0.55(-0.64,-0.46) | -0.60(-0.65,-0.56) | 189 |
| Comoros                            | 922.59(771.38-1,113.21)     | 136 | 852.30(702.86-1,032.31)     | 134 | -0.60(-0.63,-0.58) | -0.44(-0.46,-0.43) | 0.27(0.23,0.31)    | -0.26(-0.28,-0.25) | 115 |

|                             |                             |     |                           |     |                    |                    |                    |                    |     |
|-----------------------------|-----------------------------|-----|---------------------------|-----|--------------------|--------------------|--------------------|--------------------|-----|
| Djibouti                    | 983.93(817.45-1,185.50)     | 119 | 857.79(713.64-1,045.24)   | 133 | -0.66(-0.69,-0.64) | -0.75(-0.82,-0.68) | 0.13(0.00,0.26)    | -0.45(-0.50,-0.40) | 167 |
| Eritrea                     | 961.29(807.59-1,146.91)     | 125 | 878.12(730.69-1,059.05)   | 126 | -0.46(-0.48,-0.44) | -0.63(-0.68,-0.57) | 0.21(0.11,0.30)    | -0.32(-0.36,-0.28) | 140 |
| Ethiopia                    | 795.49(664.08-959.13)       | 165 | 690.78(558.20-856.27)     | 182 | -0.88(-1.10,-0.65) | -0.80(-0.86,-0.75) | 0.40(0.24,0.55)    | -0.46(-0.54,-0.37) | 171 |
| Kenya                       | 726.86(598.88-888.08)       | 182 | 666.17(545.13-825.33)     | 187 | -0.72(-0.84,-0.61) | -0.43(-0.55,-0.32) | 0.42(0.26,0.59)    | -0.26(-0.35,-0.18) | 116 |
| Madagascar                  | 1,386.40(1,147.44-1,700.02) | 21  | 1,055.40(882.71-1,253.13) | 88  | -0.45(-0.63,-0.26) | -1.70(-1.88,-1.51) | -0.65(-0.77,-0.53) | -0.99(-1.09,-0.89) | 202 |
| Malawi                      | 837.40(689.78-1,003.93)     | 156 | 809.61(669.78-983.53)     | 149 | -0.40(-0.46,-0.34) | -0.27(-0.29,-0.25) | 0.34(0.29,0.40)    | -0.12(-0.15,-0.09) | 81  |
| Mauritius                   | 1,161.34(1,017.95-1,326.73) | 73  | 1,003.96(871.70-1,161.94) | 102 | -0.38(-0.43,-0.34) | -0.73(-0.75,-0.71) | -0.36(-0.41,-0.31) | -0.51(-0.53,-0.49) | 179 |
| Mozambique                  | 898.84(758.18-1,077.69)     | 145 | 874.03(728.05-1,054.17)   | 127 | -0.20(-0.22,-0.18) | -0.32(-0.33,-0.31) | 0.28(0.24,0.32)    | -0.10(-0.11,-0.08) | 76  |
| Rwanda                      | 1,442.80(1,197.17-1,755.75) | 15  | 1,214.10(996.62-1,477.21) | 38  | -0.67(-0.75,-0.58) | -0.41(-0.53,-0.29) | -0.70(-0.96,-0.45) | -0.62(-0.71,-0.52) | 191 |
| Seychelles                  | 943.38(829.11-1,083.08)     | 127 | 946.55(822.55-1,103.84)   | 110 | -0.10(-0.16,-0.04) | -0.11(-0.13,-0.09) | 0.30(0.26,0.35)    | 0.03(0.00,0.05)    | 31  |
| Somalia                     | 1,036.54(858.38-1,239.45)   | 110 | 892.70(751.98-1,067.25)   | 122 | -0.64(-0.70,-0.57) | -0.87(-0.91,-0.82) | -0.07(-0.11,-0.04) | -0.51(-0.54,-0.48) | 180 |
| United Republic of Tanzania | 1,112.88(918.40-1,355.88)   | 89  | 1,097.53(902.24-1,330.47) | 72  | -0.20(-0.28,-0.11) | 0.47(0.35,0.60)    | -0.31(-0.49,-0.14) | -0.05(-0.13,0.03)  | 57  |
| Uganda                      | 1,076.73(892.41-1,297.20)   | 101 | 985.60(810.76-1,209.17)   | 107 | -0.37(-0.37,-0.36) | -0.55(-0.58,-0.51) | 0.07(0.03,0.12)    | -0.30(-0.32,-0.28) | 132 |
| Zambia                      | 619.27(525.02-731.11)       | 195 | 626.91(514.86-757.73)     | 191 | -0.89(-1.01,-0.77) | -0.02(-0.09,0.04)  | 1.20(1.04,1.37)    | 0.08(0.02,0.15)    | 21  |
| Botswana                    | 601.89(516.59-699.61)       | 199 | 645.33(528.72-794.89)     | 189 | -0.18(-0.37,0.01)  | 0.22(-0.29,0.74)   | 0.47(0.32,0.62)    | 0.15(-0.03,0.33)   | 13  |
| Lesotho                     | 464.97(406.16-532.98)       | 204 | 460.01(403.45-526.40)     | 204 | -0.40(-0.45,-0.36) | -0.04(-0.11,0.02)  | 0.40(0.33,0.47)    | -0.02(-0.05,0.02)  | 49  |
| Namibia                     | 602.69(520.32-701.15)       | 198 | 561.83(475.75-661.65)     | 198 | -0.30(-0.35,-0.24) | -0.57(-0.59,-0.54) | 0.19(0.11,0.27)    | -0.24(-0.27,-0.20) | 109 |
| South Africa                | 887.69(693.90-1,099.63)     | 146 | 793.85(618.47-998.94)     | 157 | 0.50(-0.09,1.08)   | -4.75(-6.46,-3.01) | 4.70(3.92,5.49)    | 0.00(-0.67,0.67)   | 40  |
| Eswatini                    | 887.64(756.10-1,047.97)     | 147 | 824.79(696.72-974.46)     | 142 | 0.34(0.23,0.45)    | -0.71(-0.79,-0.63) | -0.46(-0.75,-0.17) | -0.31(-0.41,-0.21) | 135 |
| Zimbabwe                    | 525.20(453.39-610.76)       | 203 | 532.07(456.98-619.42)     | 202 | -0.42(-0.46,-0.37) | 0.06(0.02,0.11)    | 0.61(0.56,0.67)    | 0.07(0.04,0.10)    | 24  |
| Benin                       | 719.90(611.96-851.80)       | 184 | 668.95(559.41-795.99)     | 186 | -0.58(-0.75,-0.42) | -0.35(-0.38,-0.33) | 0.23(0.16,0.30)    | -0.24(-0.30,-0.19) | 110 |
| Burkina Faso                | 650.80(548.17-773.89)       | 191 | 651.69(543.73-791.92)     | 188 | -0.28(-0.32,-0.23) | -0.05(-0.26,0.16)  | 0.37(0.28,0.45)    | 0.00(-0.08,0.07)   | 41  |
| Cameroon                    | 658.45(566.46-777.44)       | 189 | 626.01(527.17-748.64)     | 192 | -0.83(-0.86,-0.79) | 0.00(-0.07,0.07)   | 0.38(0.32,0.44)    | -0.18(-0.21,-0.14) | 97  |
| Cabo Verde                  | 682.30(574.20-809.84)       | 187 | 631.13(518.26-774.80)     | 190 | -1.07(-1.11,-1.03) | -0.30(-0.42,-0.18) | 0.64(0.57,0.72)    | -0.26(-0.31,-0.21) | 117 |
| Chad                        | 608.89(520.01-715.61)       | 196 | 593.41(502.33-706.73)     | 196 | -0.60(-0.79,-0.41) | -0.03(-0.06,-0.01) | 0.36(0.27,0.45)    | -0.09(-0.15,-0.02) | 69  |
| Cote d'Ivoire               | 730.99(621.17-873.35)       | 180 | 711.91(589.91-857.88)     | 177 | -0.07(-0.25,0.11)  | -0.34(-0.42,-0.26) | 0.18(0.01,0.34)    | -0.08(-0.17,0.01)  | 64  |
| Gambia                      | 711.21(602.89-839.69)       | 186 | 669.64(558.53-796.26)     | 185 | -0.72(-0.80,-0.64) | -0.21(-0.23,-0.18) | 0.40(0.35,0.46)    | -0.20(-0.24,-0.17) | 100 |
| Ghana                       | 545.92(459.02-656.06)       | 201 | 558.09(463.19-674.01)     | 199 | -0.40(-0.46,-0.35) | -0.08(-0.11,-0.05) | 0.79(0.58,0.99)    | 0.09(0.02,0.15)    | 20  |
| Guinea                      | 779.17(660.59-937.16)       | 168 | 747.34(630.57-901.90)     | 167 | -0.06(-0.13,0.01)  | -0.57(-0.60,-0.53) | 0.24(0.16,0.32)    | -0.16(-0.20,-0.12) | 89  |
| Guinea-Bissau               | 773.77(657.70-905.28)       | 172 | 696.36(589.15-822.77)     | 180 | -0.71(-0.78,-0.64) | -0.47(-0.51,-0.44) | 0.14(0.07,0.20)    | -0.37(-0.41,-0.34) | 154 |
| Liberia                     | 682.10(571.76-823.89)       | 188 | 619.17(512.74-751.56)     | 193 | -0.60(-0.91,-0.29) | -0.58(-0.64,-0.52) | 0.28(0.12,0.44)    | -0.32(-0.43,-0.21) | 141 |
| Mali                        | 580.58(501.46-687.02)       | 200 | 587.70(499.91-698.13)     | 197 | -0.44(-0.52,-0.37) | 0.07(-0.04,0.17)   | 0.59(0.48,0.70)    | 0.07(0.01,0.13)    | 25  |
| Mauritania                  | 939.83(783.13-1,140.51)     | 130 | 878.56(728.92-1,070.03)   | 125 | -0.35(-0.44,-0.27) | -0.48(-0.53,-0.44) | 0.15(0.10,0.21)    | -0.26(-0.30,-0.22) | 118 |
| Niger                       | 761.42(644.64-903.01)       | 176 | 672.58(564.31-806.95)     | 183 | -0.66(-0.71,-0.60) | -0.55(-0.57,-0.54) | 0.01(-0.03,0.05)   | -0.43(-0.45,-0.40) | 162 |
| Nigeria                     | 921.87(771.50-1,108.82)     | 138 | 794.11(659.01-969.69)     | 156 | -0.88(-1.36,-0.40) | -0.51(-0.58,-0.44) | -0.19(-0.65,0.27)  | -0.53(-0.74,-0.32) | 183 |
| Sao Tome and Principe       | 918.97(778.02-1,085.88)     | 139 | 817.97(692.29-960.32)     | 145 | 0.17(0.06,0.28)    | -1.03(-1.09,-0.96) | -0.29(-0.55,-0.02) | -0.43(-0.52,-0.33) | 163 |
| Senegal                     | 625.72(536.52-739.90)       | 194 | 603.18(507.57-725.01)     | 194 | -0.70(-0.74,-0.67) | -0.20(-0.24,-0.17) | 0.62(0.50,0.75)    | -0.12(-0.16,-0.08) | 82  |
| Sierra Leone                | 727.81(610.88-863.86)       | 181 | 671.90(562.66-807.42)     | 184 | -0.71(-0.80,-0.63) | -0.35(-0.66,-0.04) | 0.21(0.09,0.33)    | -0.33(-0.44,-0.21) | 143 |

|                              |                             |     |                             |     |                    |                    |                    |                    |     |
|------------------------------|-----------------------------|-----|-----------------------------|-----|--------------------|--------------------|--------------------|--------------------|-----|
| Togo                         | 813.94(684.06-970.26)       | 163 | 765.19(638.02-929.28)       | 162 | -0.31(-0.40,-0.21) | -0.49(-0.57,-0.40) | 0.22(0.15,0.30)    | -0.22(-0.27,-0.16) | 107 |
| American Samoa               | 1,106.93(950.33-1,299.62)   | 93  | 1,094.47(911.22-1,289.21)   | 74  | -1.11(-1.48,-0.74) | 0.18(0.09,0.28)    | 1.09(0.60,1.59)    | 0.06(-0.14,0.26)   | 26  |
| Bermuda                      | 1,237.93(1,001.38-1,527.63) | 49  | 1,285.15(1,024.18-1,584.46) | 21  | 0.16(0.12,0.19)    | 0.16(0.12,0.19)    | 0.25(-0.23,0.72)   | 0.17(0.02,0.32)    | 9   |
| Cook Islands                 | 1,163.69(978.10-1,381.83)   | 71  | 1,130.14(944.65-1,335.11)   | 57  | -1.03(-1.24,-0.82) | 0.13(0.08,0.18)    | 0.73(0.53,0.92)    | -0.05(-0.14,0.05)  | 58  |
| Greenland                    | 1,742.85(1,453.06-2,100.86) | 3   | 1,407.24(1,195.30-1,689.35) | 6   | -0.15(-0.29,-0.02) | -1.53(-1.69,-1.37) | -0.54(-0.57,-0.51) | -0.76(-0.83,-0.69) | 197 |
| Guam                         | 1,156.48(967.72-1,384.32)   | 75  | 1,087.24(906.93-1,298.14)   | 76  | -0.54(-0.76,-0.32) | -0.42(-0.49,-0.35) | 0.48(0.31,0.65)    | -0.17(-0.27,-0.07) | 93  |
| Monaco                       | 1,177.95(1,026.40-1,360.13) | 65  | 1,162.57(1,004.83-1,337.45) | 48  | -0.16(-0.17,-0.14) | -0.04(-0.05,-0.03) | 0.07(0.05,0.09)    | -0.04(-0.05,-0.03) | 53  |
| Nauru                        | 1,086.37(942.66-1,247.65)   | 97  | 1,073.19(910.41-1,272.27)   | 81  | -0.51(-0.54,-0.47) | -0.51(-0.54,-0.47) | 1.19(0.39,1.99)    | 0.02(-0.23,0.26)   | 36  |
| Niue                         | 1,113.31(948.64-1,317.45)   | 88  | 1,107.18(927.35-1,305.33)   | 66  | -1.13(-1.24,-1.01) | 0.09(0.07,0.12)    | 1.03(0.67,1.39)    | 0.00(-0.12,0.12)   | 42  |
| Northern Mariana Islands     | 1,170.25(992.48-1,385.51)   | 68  | 1,114.30(936.14-1,334.65)   | 63  | -0.93(-1.12,-0.74) | 0.03(-0.06,0.11)   | 0.50(0.32,0.70)    | -0.13(-0.22,-0.03) | 84  |
| Palau                        | 1,159.98(994.35-1,341.86)   | 74  | 1,064.30(908.04-1,244.13)   | 85  | -0.64(-0.70,-0.57) | -0.41(-0.42,-0.40) | 0.21(0.05,0.37)    | -0.29(-0.34,-0.23) | 127 |
| Puerto Rico                  | 1,643.37(1,333.46-1,985.12) | 4   | 1,546.00(1,254.67-1,904.49) | 2   | 0.11(0.05,0.18)    | -0.37(-0.46,-0.27) | -0.31(-0.55,-0.06) | -0.18(-0.27,-0.10) | 98  |
| Saint Kitts and Nevis        | 1,268.03(1,030.05-1,548.98) | 40  | 1,267.06(1,017.93-1,573.40) | 23  | -0.13(-0.14,-0.12) | -0.13(-0.14,-0.12) | 0.30(0.13,0.47)    | 0.00(-0.05,0.06)   | 43  |
| San Marino                   | 1,170.24(1,022.46-1,342.40) | 69  | 1,159.87(1,005.06-1,335.66) | 49  | -0.14(-0.15,-0.13) | -0.03(-0.03,-0.02) | 0.09(0.05,0.13)    | -0.03(-0.04,-0.01) | 51  |
| Tokelau                      | 1,096.98(917.07-1,309.23)   | 96  | 1,101.79(918.09-1,300.47)   | 69  | -1.11(-1.34,-0.88) | 0.26(0.17,0.35)    | 1.09(0.83,1.34)    | 0.08(-0.04,0.21)   | 22  |
| Tuvalu                       | 1,060.06(926.02-1,207.52)   | 104 | 1,093.51(910.76-1,289.41)   | 75  | -0.54(-0.57,-0.50) | -0.54(-0.57,-0.50) | 1.78(1.01,2.56)    | 0.17(-0.06,0.41)   | 10  |
| United States Virgin Islands | 1,163.25(954.81-1,439.40)   | 72  | 1,214.28(981.53-1,503.73)   | 37  | -0.04(-0.07,0.00)  | 0.10(0.09,0.11)    | 0.42(0.31,0.54)    | 0.16(0.12,0.19)    | 11  |
| South Sudan                  | 942.87(786.96-1,129.46)     | 128 | 846.53(703.75-1,024.67)     | 135 | -0.61(-0.65,-0.58) | -0.61(-0.65,-0.58) | 0.25(0.03,0.47)    | -0.34(-0.42,-0.26) | 144 |
| Sudan                        | 922.02(775.42-1,088.25)     | 137 | 893.66(749.57-1,079.49)     | 121 | -0.13(-0.15,-0.12) | -0.42(-0.46,-0.37) | 0.31(0.23,0.39)    | -0.10(-0.13,-0.07) | 77  |

#### Number of incident cases

|                                       |                                  |     |                                  |     |                    |                    |                    |                    |     |
|---------------------------------------|----------------------------------|-----|----------------------------------|-----|--------------------|--------------------|--------------------|--------------------|-----|
| China                                 | 10,224,943(8,846,743-12,043,793) | 1   | 10,768,476(9,581,576-12,231,493) | 1   | -0.34(-0.96,0.29)  | -0.60(-0.88,-0.33) | 1.94(1.46,2.42)    | 0.28(-0.01,0.58)   | 123 |
| Democratic People's Republic of Korea | 237,127(202,626-280,311)         | 37  | 266,205(236,267-300,383)         | 47  | 1.44(1.30,1.57)    | -0.05(-0.21,0.10)  | -0.19(-0.26,-0.13) | 0.35(0.28,0.42)    | 120 |
| Taiwan (Province of China)            | 228,122(199,855-264,996)         | 39  | 236,048(210,713-267,834)         | 50  | 1.09(0.90,1.28)    | -0.08(-0.14,-0.03) | -0.75(-1.19,-0.30) | 0.07(-0.08,0.23)   | 136 |
| Cambodia                              | 107,275(91,535-125,713)          | 70  | 159,372(138,513-185,528)         | 67  | 1.05(1.02,1.08)    | 1.17(1.13,1.20)    | 1.89(1.62,2.17)    | 1.36(1.27,1.45)    | 60  |
| Indonesia                             | 2,227,474(1,945,397-2,590,600)   | 5   | 2,794,581(2,483,544-3,169,294)   | 4   | 0.47(0.28,0.66)    | 1.61(1.50,1.72)    | 0.35(0.27,0.43)    | 0.77(0.69,0.85)    | 93  |
| Lao People's Democratic Republic      | 44,233(38,143-51,198)            | 114 | 65,392(57,798-74,848)            | 106 | 1.97(1.87,2.06)    | 1.00(0.96,1.03)    | 1.13(1.03,1.24)    | 1.35(1.30,1.40)    | 62  |
| Malaysia                              | 184,942(161,935-212,812)         | 48  | 288,908(253,065-337,399)         | 44  | 2.58(2.51,2.65)    | 1.45(1.40,1.49)    | 0.74(0.62,0.86)    | 1.54(1.49,1.60)    | 53  |
| Maldives                              | 3,048(2,555-3,688)               | 173 | 4,227(3,641-4,934)               | 170 | 0.63(0.43,0.82)    | 0.37(0.20,0.55)    | 2.52(2.40,2.64)    | 1.10(1.00,1.21)    | 70  |
| Myanmar                               | 390,722(347,251-443,706)         | 28  | 484,687(436,845-543,044)         | 27  | 0.68(0.65,0.71)    | 0.62(0.61,0.64)    | 0.95(0.93,0.98)    | 0.74(0.73,0.76)    | 96  |
| Philippines                           | 1,051,577(876,247-1,299,119)     | 8   | 1,490,866(1,273,671-1,778,183)   | 7   | 1.18(1.04,1.32)    | 1.22(1.16,1.29)    | 1.17(1.15,1.18)    | 1.19(1.14,1.25)    | 67  |
| Sri Lanka                             | 174,908(153,666-199,439)         | 49  | 230,219(205,001-258,970)         | 52  | 0.94(0.93,0.95)    | 1.06(1.04,1.08)    | 0.88(0.86,0.91)    | 0.95(0.94,0.96)    | 82  |
| Thailand                              | 612,679(537,700-705,086)         | 20  | 671,563(597,680-756,889)         | 22  | 0.59(0.55,0.62)    | 0.06(-0.13,0.24)   | 0.42(0.21,0.64)    | 0.29(0.18,0.40)    | 122 |
| Timor-Leste                           | 9,588(8,140-11,356)              | 148 | 14,549(12,546-16,989)            | 147 | 1.10(0.97,1.23)    | 1.36(1.18,1.54)    | 1.88(1.84,1.92)    | 1.42(1.34,1.50)    | 56  |
| Viet Nam                              | 693,553(594,992-818,645)         | 17  | 934,360(824,879-1,071,259)       | 11  | 1.78(1.51,2.06)    | 0.16(0.03,0.29)    | 1.13(1.03,1.23)    | 1.05(0.93,1.17)    | 74  |
| Fiji                                  | 9,256(8,038-10,680)              | 153 | 9,532(8,382-10,954)              | 159 | 0.16(0.10,0.22)    | -0.25(-0.30,-0.20) | 0.46(0.36,0.55)    | 0.11(0.06,0.15)    | 133 |
| Kiribati                              | 1,111(963-1,279)                 | 186 | 1,464(1,291-1,668)               | 181 | 1.05(0.97,1.13)    | 0.98(0.97,1.00)    | 0.82(0.75,0.89)    | 0.95(0.92,0.99)    | 83  |
| Marshall Islands                      | 565(479-667)                     | 194 | 590(506-687)                     | 194 | 0.07(0.04,0.09)    | -0.21(-0.24,-0.19) | 0.70(0.51,0.89)    | 0.16(0.10,0.22)    | 129 |
| Micronesia (Federated States of)      | 1,259(1,070-1,465)               | 184 | 1,061(902-1,236)                 | 185 | -0.50(-0.59,-0.41) | -1.20(-1.27,-1.12) | -0.06(-0.64,0.52)  | -0.61(-0.80,-0.43) | 171 |

|                        |                                |     |                                |     |                    |                    |                    |                    |     |
|------------------------|--------------------------------|-----|--------------------------------|-----|--------------------|--------------------|--------------------|--------------------|-----|
| Papua New Guinea       | 58,693(50,328-67,901)          | 104 | 124,519(108,835-142,061)       | 76  | 3.17(3.15,3.19)    | 2.18(2.10,2.26)    | 2.55(2.52,2.58)    | 2.62(2.59,2.65)    | 17  |
| Samoa                  | 1,850(1,577-2,171)             | 177 | 2,201(1,862-2,610)             | 177 | -0.17(-0.33,-0.01) | 0.23(0.17,0.28)    | 1.91(1.72,2.10)    | 0.64(0.55,0.73)    | 102 |
| Solomon Islands        | 4,165(3,503-4,913)             | 167 | 7,617(6,444-9,138)             | 162 | 2.21(1.81,2.61)    | 1.61(1.50,1.73)    | 2.73(2.44,3.01)    | 2.18(2.01,2.35)    | 33  |
| Tonga                  | 1,261(1,055-1,530)             | 183 | 1,212(1,016-1,445)             | 183 | 0.03(-0.22,0.29)   | -0.22(-0.32,-0.12) | -0.12(-0.33,0.08)  | -0.10(-0.21,0.02)  | 150 |
| Vanuatu                | 1,784(1,517-2,092)             | 178 | 3,253(2,650-3,908)             | 175 | 1.65(1.59,1.70)    | 1.65(1.59,1.70)    | 3.41(2.31,4.52)    | 2.19(1.85,2.53)    | 32  |
| Armenia                | 37,094(31,193-43,933)          | 123 | 26,631(22,641-31,228)          | 137 | -2.16(-2.33,-1.98) | -1.41(-1.57,-1.25) | 0.25(0.18,0.31)    | -1.12(-1.19,-1.04) | 187 |
| Azerbaijan             | 84,192(70,827-100,338)         | 80  | 92,715(79,315-108,388)         | 92  | -0.14(-0.26,-0.02) | -0.10(-0.15,-0.05) | 1.19(0.99,1.39)    | 0.32(0.24,0.39)    | 121 |
| Georgia                | 54,243(47,245-62,868)          | 107 | 31,673(27,157-37,009)          | 134 | -2.86(-3.15,-2.56) | -2.18(-2.44,-1.91) | -0.32(-0.45,-0.20) | -1.80(-1.93,-1.66) | 202 |
| Kazakhstan             | 172,021(146,937-200,783)       | 50  | 183,399(156,916-214,733)       | 63  | -2.67(-2.74,-2.60) | 0.94(0.80,1.08)    | 2.45(2.24,2.66)    | 0.20(0.12,0.28)    | 127 |
| Kyrgyzstan             | 60,997(51,401-73,081)          | 100 | 77,235(64,545-92,830)          | 99  | -0.14(-0.29,0.01)  | 0.42(0.37,0.46)    | 2.17(2.01,2.33)    | 0.82(0.74,0.89)    | 90  |
| Mongolia               | 28,673(24,009-34,347)          | 131 | 37,556(31,639-44,758)          | 126 | -0.57(-0.88,-0.25) | 0.38(0.01,0.75)    | 3.18(3.05,3.31)    | 0.99(0.83,1.16)    | 79  |
| Tajikistan             | 75,346(62,525-90,691)          | 87  | 111,872(93,086-134,566)        | 83  | 0.71(0.59,0.83)    | 0.89(0.66,1.12)    | 2.53(2.47,2.58)    | 1.38(1.30,1.46)    | 59  |
| Turkmenistan           | 51,232(42,947-61,754)          | 108 | 54,277(45,334-65,278)          | 114 | -0.38(-0.50,-0.25) | -0.58(-0.79,-0.37) | 1.61(1.53,1.69)    | 0.21(0.12,0.29)    | 126 |
| Uzbekistan             | 314,586(262,562-377,382)       | 34  | 404,280(340,884-482,310)       | 31  | 0.82(0.72,0.92)    | 0.16(-0.14,0.46)   | 1.63(1.57,1.70)    | 0.85(0.75,0.96)    | 88  |
| Albania                | 24,199(20,746-28,846)          | 134 | 18,106(15,841-20,865)          | 140 | -0.65(-1.10,-0.19) | -1.55(-1.90,-1.20) | -0.33(-0.73,0.07)  | -0.96(-1.31,-0.62) | 184 |
| Bosnia and Herzegovina | 40,464(34,693-47,557)          | 117 | 26,889(23,427-30,889)          | 136 | -1.48(-2.03,-0.92) | -1.28(-1.50,-1.06) | -1.65(-1.71,-1.58) | -1.45(-1.65,-1.26) | 196 |
| Bulgaria               | 70,647(61,340-81,464)          | 89  | 46,456(40,191-53,214)          | 120 | -2.11(-2.44,-1.77) | -1.32(-1.38,-1.26) | -0.88(-1.08,-0.68) | -1.43(-1.55,-1.30) | 194 |
| Croatia                | 46,472(39,986-53,585)          | 112 | 32,239(28,369-36,909)          | 133 | -1.36(-1.47,-1.25) | -1.62(-1.67,-1.57) | -0.73(-0.85,-0.62) | -1.27(-1.33,-1.21) | 190 |
| Czechia                | 70,399(60,186-81,869)          | 90  | 66,390(57,528-76,111)          | 103 | -1.12(-1.41,-0.82) | -0.14(-0.23,-0.04) | 0.88(0.61,1.15)    | -0.17(-0.31,-0.03) | 154 |
| Hungary                | 85,029(73,683-97,354)          | 79  | 66,076(57,785-75,492)          | 105 | -0.92(-1.23,-0.61) | -0.77(-1.10,-0.44) | -0.93(-1.10,-0.77) | -0.90(-1.06,-0.75) | 182 |
| North Macedonia        | 22,519(18,712-27,037)          | 136 | 19,699(17,296-22,262)          | 139 | 0.20(-0.07,0.46)   | -1.49(-1.90,-1.09) | 0.19(0.11,0.27)    | -0.47(-0.69,-0.25) | 165 |
| Montenegro             | 4,731(3,967-5,610)             | 161 | 4,393(3,742-5,189)             | 169 | -0.50(-0.52,-0.48) | -0.50(-0.52,-0.48) | 0.40(0.07,0.74)    | -0.22(-0.32,-0.12) | 157 |
| Poland                 | 527,700(452,169-614,610)       | 21  | 348,098(299,130-407,340)       | 39  | -1.26(-1.46,-1.07) | -2.10(-2.18,-2.03) | -0.97(-1.04,-0.89) | -1.48(-1.56,-1.40) | 198 |
| Romania                | 189,844(161,440-225,205)       | 47  | 134,582(114,731-158,271)       | 73  | -1.11(-1.25,-0.98) | -1.38(-1.45,-1.31) | -1.08(-1.23,-0.93) | -1.19(-1.27,-1.11) | 188 |
| Serbia                 | 68,486(59,970-78,753)          | 92  | 56,404(49,655-64,221)          | 112 | -0.41(-0.88,0.06)  | -1.07(-1.16,-0.98) | -0.56(-0.69,-0.43) | -0.71(-0.86,-0.55) | 177 |
| Slovakia               | 37,488(32,158-43,828)          | 120 | 33,271(28,866-38,379)          | 132 | -0.73(-0.91,-0.56) | -0.51(-0.57,-0.45) | 0.09(-0.06,0.25)   | -0.40(-0.49,-0.32) | 161 |
| Slovenia               | 19,388(16,861-22,469)          | 140 | 16,575(14,362-19,181)          | 143 | -0.91(-1.03,-0.80) | -0.75(-0.82,-0.68) | 0.06(0.01,0.11)    | -0.54(-0.59,-0.50) | 169 |
| Belarus                | 98,955(84,442-116,450)         | 74  | 66,134(56,585-78,252)          | 104 | -1.95(-2.11,-1.79) | -2.31(-2.39,-2.22) | 0.27(0.13,0.42)    | -1.38(-1.46,-1.29) | 192 |
| Estonia                | 12,215(10,657-13,905)          | 146 | 8,127(7,095-9,283)             | 161 | -2.67(-3.14,-2.20) | -2.06(-2.15,-1.97) | 0.28(0.16,0.41)    | -1.45(-1.61,-1.29) | 197 |
| Latvia                 | 21,574(18,826-24,760)          | 138 | 11,593(9,895-13,593)           | 153 | -3.04(-3.14,-2.93) | -2.14(-2.17,-2.12) | -1.02(-1.08,-0.95) | -2.11(-2.15,-2.07) | 204 |
| Lithuania              | 26,816(23,230-30,817)          | 132 | 16,561(14,245-19,120)          | 144 | -1.91(-1.97,-1.85) | -2.15(-2.60,-1.70) | -0.96(-1.18,-0.74) | -1.69(-1.85,-1.52) | 200 |
| Republic of Moldova    | 36,457(30,769-43,838)          | 125 | 21,574(18,321-25,452)          | 138 | -2.20(-2.31,-2.08) | -2.30(-2.36,-2.24) | -0.83(-0.93,-0.72) | -1.80(-1.86,-1.74) | 203 |
| Russian Federation     | 1,496,268(1,285,428-1,759,934) | 7   | 977,895(837,720-1,145,889)     | 10  | -2.25(-2.52,-1.98) | -2.26(-2.34,-2.18) | 0.29(0.06,0.51)    | -1.43(-1.56,-1.31) | 195 |
| Ukraine                | 470,705(391,683-562,514)       | 24  | 280,548(234,124-336,784)       | 46  | -2.33(-2.57,-2.08) | -2.72(-2.87,-2.58) | 0.03(-0.27,0.33)   | -1.73(-1.87,-1.58) | 201 |
| Brunei Darussalam      | 3,142(2,660-3,740)             | 172 | 4,204(3,626-4,877)             | 171 | 1.80(1.73,1.87)    | 0.45(0.39,0.51)    | 0.89(0.85,0.94)    | 1.01(0.97,1.05)    | 76  |
| Japan                  | 1,788,610(1,572,865-2,047,499) | 6   | 1,210,790(1,082,180-1,357,791) | 9   | -1.43(-1.56,-1.30) | -2.30(-2.44,-2.16) | -0.25(-0.34,-0.16) | -1.39(-1.47,-1.32) | 193 |
| Republic of Korea      | 435,437(380,428-501,616)       | 26  | 433,965(386,106-488,346)       | 29  | 0.02(-0.30,0.33)   | -0.50(-0.57,-0.43) | 0.60(0.52,0.68)    | 0.00(-0.10,0.10)   | 141 |
| Singapore              | 31,228(27,052-35,898)          | 128 | 42,732(37,246-49,388)          | 123 | 1.71(1.44,1.98)    | 0.29(0.14,0.45)    | 1.38(0.99,1.77)    | 1.08(0.91,1.25)    | 72  |

|                          |                                |     |                                |     |                    |                    |                    |                    |     |
|--------------------------|--------------------------------|-----|--------------------------------|-----|--------------------|--------------------|--------------------|--------------------|-----|
| Australia                | 191,915(163,411-221,183)       | 46  | 234,875(203,629-272,194)       | 51  | 1.33(1.15,1.52)    | -0.45(-0.57,-0.32) | 1.19(1.13,1.25)    | 0.71(0.63,0.79)    | 99  |
| New Zealand              | 51,123(43,863-59,582)          | 109 | 51,547(44,341-60,189)          | 115 | -0.15(-0.30,0.00)  | 0.18(0.11,0.25)    | 0.12(0.02,0.22)    | 0.01(-0.06,0.08)   | 140 |
| Andorra                  | 559(495-629)                   | 195 | 775(691-867)                   | 189 | 1.70(0.50,2.91)    | 2.00(0.92,3.09)    | -0.52(-0.85,-0.19) | 0.96(0.43,1.50)    | 81  |
| Austria                  | 87,434(78,771-96,855)          | 78  | 86,754(78,035-96,207)          | 96  | -0.16(-0.23,-0.09) | -0.15(-0.17,-0.12) | 0.33(0.26,0.40)    | -0.03(-0.07,0.00)  | 143 |
| Belgium                  | 115,945(104,501-128,910)       | 67  | 110,601(99,106-122,955)        | 84  | -1.21(-1.38,-1.03) | 0.58(0.50,0.66)    | 0.19(0.10,0.29)    | -0.20(-0.27,-0.12) | 155 |
| Cyprus                   | 9,315(8,127-10,652)            | 152 | 13,843(12,240-15,661)          | 149 | 0.91(0.88,0.93)    | 1.55(1.47,1.63)    | 1.73(1.69,1.77)    | 1.39(1.36,1.42)    | 58  |
| Denmark                  | 61,057(55,127-67,920)          | 99  | 62,094(55,148-69,540)          | 109 | 0.45(0.32,0.58)    | -0.10(-0.15,-0.05) | -0.14(-0.44,0.16)  | 0.06(-0.05,0.16)   | 138 |
| Finland                  | 55,908(50,390-61,902)          | 106 | 58,482(52,821-64,710)          | 111 | 0.41(0.36,0.46)    | 0.29(0.26,0.31)    | -0.27(-0.30,-0.24) | 0.14(0.12,0.17)    | 131 |
| France                   | 807,039(727,937-902,606)       | 14  | 789,638(708,298-882,777)       | 17  | -0.50(-0.57,-0.44) | 0.19(0.12,0.26)    | 0.02(-0.19,0.22)   | -0.10(-0.17,-0.03) | 151 |
| Germany                  | 892,278(789,638-984,465)       | 11  | 737,648(664,296-820,037)       | 21  | -1.89(-2.02,-1.77) | -0.28(-0.39,-0.16) | 0.13(-0.02,0.28)   | -0.66(-0.74,-0.58) | 174 |
| Greece                   | 104,934(93,291-118,174)        | 71  | 93,318(83,128-104,013)         | 91  | -0.08(-0.10,-0.06) | -0.13(-0.17,-0.08) | -1.07(-1.18,-0.96) | -0.41(-0.45,-0.37) | 164 |
| Iceland                  | 3,897(3,373-4,492)             | 168 | 4,417(3,862-5,068)             | 168 | 0.58(0.46,0.71)    | 0.19(0.15,0.24)    | 0.48(0.38,0.57)    | 0.43(0.37,0.49)    | 113 |
| Ireland                  | 49,589(43,633-56,501)          | 110 | 55,277(48,711-62,245)          | 113 | -0.51(-0.54,-0.47) | 1.39(1.30,1.48)    | 0.08(0.04,0.11)    | 0.38(0.33,0.42)    | 117 |
| Israel                   | 60,727(53,111-69,125)          | 101 | 104,211(91,109-118,432)        | 88  | 1.96(1.84,2.09)    | 1.73(1.69,1.78)    | 1.94(1.89,1.99)    | 1.87(1.83,1.91)    | 47  |
| Italy                    | 658,020(591,039-730,518)       | 18  | 570,773(512,850-630,811)       | 24  | -0.66(-0.89,-0.43) | -0.27(-0.57,0.03)  | -0.54(-0.68,-0.40) | -0.52(-0.66,-0.39) | 168 |
| Luxembourg               | 4,563(4,049-5,373)             | 165 | 6,454(5,779-7,209)             | 163 | 1.24(1.19,1.29)    | 0.63(0.58,0.68)    | 1.81(1.77,1.84)    | 1.18(1.15,1.21)    | 68  |
| Malta                    | 4,724(4,219-5,276)             | 162 | 4,616(4,131-5,154)             | 167 | 0.05(0.01,0.10)    | -0.37(-0.38,-0.35) | 0.10(0.03,0.17)    | -0.09(-0.11,-0.06) | 148 |
| Netherlands              | 146,367(133,286-159,965)       | 55  | 156,751(142,463-171,304)       | 68  | 0.54(0.46,0.63)    | -0.19(-0.26,-0.13) | 0.32(0.28,0.36)    | 0.23(0.19,0.27)    | 124 |
| Norway                   | 63,409(55,955-71,566)          | 95  | 62,815(55,430-71,248)          | 108 | -0.06(-0.17,0.06)  | -0.21(-0.26,-0.16) | 0.27(0.20,0.34)    | -0.04(-0.09,0.01)  | 145 |
| Portugal                 | 135,534(119,758-154,432)       | 58  | 118,714(106,597-131,471)       | 77  | -0.65(-0.94,-0.36) | 0.29(0.12,0.45)    | -0.90(-1.00,-0.81) | -0.50(-0.62,-0.38) | 167 |
| Spain                    | 395,506(351,443-444,933)       | 27  | 442,054(395,323-492,744)       | 28  | -0.40(-0.47,-0.33) | 1.95(1.87,2.03)    | -0.48(-0.56,-0.39) | 0.38(0.34,0.42)    | 118 |
| Sweden                   | 123,870(109,286-138,790)       | 62  | 117,354(103,973-132,367)       | 78  | -1.77(-1.98,-1.56) | -0.29(-0.69,0.11)  | 1.17(0.18,2.17)    | -0.33(-0.68,0.02)  | 160 |
| Switzerland              | 80,423(72,033-89,551)          | 83  | 90,008(80,411-100,265)         | 94  | 0.16(0.10,0.22)    | -0.03(-0.10,0.03)  | 1.06(1.02,1.11)    | 0.37(0.33,0.40)    | 119 |
| United Kingdom           | 898,204(793,326-1,016,858)     | 10  | 874,675(775,210-988,347)       | 14  | -0.53(-0.81,-0.24) | 0.11(0.07,0.16)    | 0.11(0.07,0.16)    | -0.16(-0.26,-0.05) | 152 |
| Argentina                | 435,448(378,992-507,939)       | 25  | 545,391(468,386-640,857)       | 25  | 0.86(0.79,0.93)    | 0.88(0.86,0.89)    | 0.58(0.53,0.63)    | 0.78(0.75,0.81)    | 92  |
| Chile                    | 158,456(137,150-185,429)       | 52  | 192,401(167,855-221,623)       | 61  | 0.67(0.45,0.90)    | -0.19(-0.33,-0.05) | 1.48(1.31,1.65)    | 0.65(0.55,0.76)    | 101 |
| Uruguay                  | 39,071(34,077-45,134)          | 119 | 37,349(32,553-43,199)          | 127 | 0.01(-0.05,0.08)   | -0.54(-0.60,-0.48) | 0.13(0.07,0.18)    | -0.16(-0.20,-0.12) | 153 |
| Canada                   | 307,605(265,554-358,268)       | 35  | 364,788(319,565-418,535)       | 37  | 0.66(0.45,0.87)    | 0.96(0.88,1.04)    | 0.20(-0.18,0.57)   | 0.63(0.49,0.77)    | 103 |
| United States of America | 4,353,766(3,643,079-5,316,502) | 3   | 5,545,294(4,814,147-6,415,919) | 3   | -1.32(-1.65,-0.99) | 2.36(2.13,2.59)    | 1.24(1.04,1.44)    | 0.87(0.71,1.04)    | 85  |
| Antigua and Barbuda      | 779(633-972)                   | 189 | 869(714-1,046)                 | 188 | 1.72(1.40,2.04)    | -0.08(-0.17,0.01)  | -0.42(-0.64,-0.20) | 0.42(0.29,0.56)    | 114 |
| Bahamas                  | 3,280(2,668-4,079)             | 170 | 3,819(3,130-4,616)             | 173 | 1.88(1.69,2.07)    | 0.41(0.25,0.56)    | -0.44(-0.59,-0.29) | 0.57(0.47,0.66)    | 107 |
| Barbados                 | 3,036(2,546-3,651)             | 174 | 3,052(2,580-3,624)             | 176 | -0.42(-0.54,-0.30) | 0.89(0.84,0.94)    | -0.46(-0.50,-0.42) | 0.02(-0.03,0.06)   | 139 |
| Belize                   | 3,196(2,547-3,946)             | 171 | 5,215(4,223-6,376)             | 166 | 1.30(1.13,1.48)    | 2.43(2.14,2.71)    | 1.38(1.25,1.52)    | 1.68(1.56,1.79)    | 51  |
| Cuba                     | 140,047(115,056-169,727)       | 56  | 113,748(95,379-134,548)        | 80  | -0.75(-0.82,-0.67) | -1.11(-1.42,-0.80) | -0.45(-0.79,-0.10) | -0.75(-0.90,-0.60) | 179 |
| Dominica                 | 1,055(865-1,288)               | 187 | 773(645-927)                   | 190 | -0.56(-0.61,-0.52) | -1.14(-1.30,-0.98) | -1.41(-1.50,-1.31) | -1.04(-1.10,-0.98) | 186 |
| Dominican Republic       | 92,803(75,781-111,931)         | 77  | 112,067(92,417-136,646)        | 82  | 0.08(-0.08,0.25)   | 0.83(0.63,1.03)    | 1.26(1.01,1.50)    | 0.72(0.59,0.84)    | 98  |
| Grenada                  | 1,378(1,094-1,716)             | 182 | 1,226(1,017-1,495)             | 182 | 0.42(0.26,0.58)    | -0.63(-0.68,-0.59) | -1.01(-1.12,-0.90) | -0.40(-0.46,-0.33) | 162 |
| Guyana                   | 11,777(9,608-14,418)           | 147 | 9,732(7,997-11,804)            | 157 | -0.08(-0.22,0.06)  | -1.74(-1.83,-1.64) | -0.01(-0.22,0.20)  | -0.63(-0.72,-0.54) | 173 |



|                                    |                                |     |                                |     |                    |                    |                    |                    |     |
|------------------------------------|--------------------------------|-----|--------------------------------|-----|--------------------|--------------------|--------------------|--------------------|-----|
| Haiti                              | 129,197(104,024-156,403)       | 59  | 197,544(162,055-238,849)       | 58  | 1.69(1.54,1.85)    | 1.28(1.24,1.31)    | 1.55(1.44,1.67)    | 1.49(1.43,1.56)    | 54  |
| Jamaica                            | 37,289(30,063-46,266)          | 121 | 30,049(24,789-36,427)          | 135 | 0.01(-0.14,0.17)   | -1.32(-1.42,-1.22) | -0.74(-0.87,-0.61) | -0.73(-0.81,-0.64) | 178 |
| Saint Lucia                        | 2,224(1,801-2,730)             | 176 | 1,814(1,520-2,144)             | 179 | 0.27(0.15,0.39)    | -1.26(-1.32,-1.21) | -1.04(-1.13,-0.96) | -0.69(-0.76,-0.62) | 175 |
| Saint Vincent and the Grenadines   | 1,616(1,303-2,009)             | 179 | 1,209(999-1,463)               | 184 | -1.16(-1.17,-1.14) | -1.16(-1.17,-1.14) | -0.58(-0.83,-0.32) | -0.98(-1.06,-0.90) | 185 |
| Suriname                           | 5,242(4,234-6,554)             | 160 | 6,434(5,260-7,861)             | 164 | 0.46(0.21,0.70)    | 1.05(0.96,1.14)    | 0.69(0.62,0.76)    | 0.77(0.67,0.87)    | 94  |
| Trinidad and Tobago                | 14,089(11,526-17,260)          | 144 | 12,468(10,298-15,154)          | 151 | -1.52(-1.57,-1.46) | -0.44(-0.48,-0.41) | 0.92(0.66,1.18)    | -0.40(-0.48,-0.31) | 163 |
| Bolivia (Plurinational State of)   | 113,846(90,084-140,050)        | 68  | 154,056(123,754-194,547)       | 69  | 1.21(1.08,1.34)    | 0.14(0.07,0.21)    | 2.00(1.87,2.14)    | 1.07(0.99,1.14)    | 73  |
| Ecuador                            | 158,024(124,598-196,949)       | 53  | 193,356(155,358-242,420)       | 59  | 0.25(-0.05,0.55)   | 0.31(0.20,0.42)    | 1.68(1.58,1.77)    | 0.70(0.58,0.82)    | 100 |
| Peru                               | 355,592(277,483-445,672)       | 32  | 364,093(292,650-459,246)       | 38  | -0.09(-0.20,0.02)  | -1.34(-1.58,-1.10) | 1.96(1.86,2.07)    | 0.08(-0.04,0.21)   | 135 |
| Colombia                           | 373,988(299,569-465,273)       | 31  | 366,733(296,217-451,110)       | 35  | 0.41(0.10,0.72)    | -0.18(-0.22,-0.14) | -0.18(-0.22,-0.14) | -0.07(-0.19,0.05)  | 147 |
| Costa Rica                         | 43,868(34,856-54,475)          | 115 | 45,446(36,970-55,803)          | 121 | 2.10(2.04,2.16)    | -1.58(-1.75,-1.42) | -0.04(-0.11,0.03)  | 0.13(0.06,0.19)    | 132 |
| El Salvador                        | 95,831(74,709-120,583)         | 75  | 67,221(54,573-83,752)          | 102 | -0.43(-0.56,-0.30) | -2.52(-2.62,-2.42) | -0.44(-0.53,-0.34) | -1.24(-1.31,-1.17) | 189 |
| Guatemala                          | 126,959(99,587-156,863)        | 61  | 152,848(121,789-192,306)       | 71  | 1.05(0.83,1.26)    | -0.28(-0.74,0.17)  | 1.17(1.11,1.23)    | 0.62(0.45,0.79)    | 104 |
| Honduras                           | 78,439(60,936-98,151)          | 85  | 101,412(80,961-127,037)        | 89  | 1.38(1.17,1.59)    | 0.21(0.16,0.26)    | 1.23(1.02,1.44)    | 0.89(0.79,0.99)    | 84  |
| Mexico                             | 878,069(699,839-1,118,961)     | 12  | 924,598(732,794-1,147,955)     | 12  | -0.34(-0.56,-0.12) | 0.14(-0.04,0.32)   | 1.00(0.94,1.05)    | 0.20(0.09,0.30)    | 128 |
| Nicaragua                          | 65,207(50,650-82,824)          | 93  | 61,612(48,953-77,296)          | 110 | -0.20(-0.40,0.01)  | -0.40(-0.56,-0.24) | 0.04(-0.10,0.18)   | -0.23(-0.33,-0.13) | 158 |
| Panama                             | 30,468(24,602-37,336)          | 129 | 40,660(32,614-50,480)          | 124 | 1.08(0.98,1.19)    | 0.60(0.53,0.66)    | 1.44(1.33,1.54)    | 1.01(0.95,1.07)    | 77  |
| Venezuela (Bolivarian Republic of) | 233,313(184,955-292,810)       | 38  | 238,150(192,222-292,107)       | 49  | 0.80(0.49,1.10)    | 0.26(0.17,0.36)    | -1.04(-1.30,-0.77) | -0.02(-0.16,0.13)  | 142 |
| Brazil                             | 2,470,862(1,941,393-3,138,864) | 4   | 2,465,487(1,968,598-3,012,172) | 5   | -0.07(-0.22,0.09)  | -0.60(-0.66,-0.53) | 0.71(0.55,0.87)    | -0.03(-0.11,0.05)  | 144 |
| Paraguay                           | 63,935(50,396-81,129)          | 94  | 92,193(73,706-115,264)         | 93  | 1.89(1.72,2.07)    | 1.00(0.98,1.02)    | 1.00(0.98,1.02)    | 1.28(1.22,1.33)    | 64  |
| Algeria                            | 223,097(185,764-271,230)       | 41  | 328,903(273,714-398,370)       | 41  | 0.90(0.68,1.11)    | 0.99(0.89,1.10)    | 2.34(2.21,2.48)    | 1.36(1.27,1.46)    | 61  |
| Bahrain                            | 4,675(3,876-5,656)             | 164 | 9,504(7,997-11,211)            | 160 | 1.92(1.83,2.01)    | 4.60(4.29,4.92)    | 0.75(0.64,0.86)    | 2.46(2.32,2.60)    | 23  |
| Egypt                              | 491,482(397,075-604,052)       | 23  | 752,686(614,049-921,930)       | 20  | 0.59(0.52,0.67)    | 1.60(1.38,1.83)    | 2.25(2.20,2.31)    | 1.48(1.40,1.55)    | 55  |
| Iran (Islamic Republic of)         | 620,403(498,943-764,078)       | 19  | 633,257(533,798-754,359)       | 23  | -0.04(-0.17,0.08)  | -0.52(-0.56,-0.48) | 0.90(0.85,0.94)    | 0.07(0.02,0.11)    | 137 |
| Iraq                               | 202,572(163,238-248,882)       | 45  | 365,155(297,870-452,588)       | 36  | 3.62(3.23,4.02)    | 1.12(0.41,1.84)    | 1.55(1.43,1.67)    | 2.09(1.82,2.35)    | 37  |
| Jordan                             | 40,110(32,122-50,668)          | 118 | 107,129(86,490-132,277)        | 85  | 1.77(1.68,1.86)    | 3.85(3.14,4.57)    | 4.79(4.65,4.93)    | 3.45(3.22,3.68)    | 5   |
| Kuwait                             | 16,856(13,784-20,406)          | 143 | 34,162(27,999-41,146)          | 130 | -0.45(-0.78,-0.12) | 3.87(3.67,4.08)    | 3.94(3.72,4.17)    | 2.50(2.34,2.65)    | 21  |
| Lebanon                            | 33,773(27,997-41,280)          | 126 | 47,120(39,274-56,338)          | 119 | 0.24(0.14,0.33)    | 0.52(0.24,0.80)    | 2.70(1.99,3.41)    | 1.10(0.86,1.35)    | 71  |
| Libya                              | 43,391(34,888-52,993)          | 116 | 50,222(42,502-58,902)          | 116 | 0.52(0.42,0.63)    | 0.84(0.79,0.89)    | 0.15(0.10,0.21)    | 0.51(0.46,0.55)    | 111 |
| Morocco                            | 203,812(170,676-242,738)       | 44  | 258,857(219,701-304,756)       | 48  | 1.15(1.10,1.20)    | 0.71(0.68,0.74)    | 0.69(0.63,0.76)    | 0.84(0.81,0.87)    | 89  |
| Palestine                          | 21,173(17,034-26,369)          | 139 | 44,510(35,838-55,049)          | 122 | 3.04(2.73,3.34)    | 2.93(2.84,3.02)    | 1.85(1.72,1.98)    | 2.63(2.52,2.73)    | 16  |
| Oman                               | 17,236(14,145-21,244)          | 141 | 36,809(30,489-44,762)          | 128 | 0.69(0.51,0.86)    | 2.01(1.15,2.87)    | 4.92(3.94,5.91)    | 2.58(2.16,3.00)    | 18  |
| Qatar                              | 3,566(2,915-4,409)             | 169 | 18,080(15,162-21,416)          | 141 | 2.35(2.16,2.54)    | 7.99(7.41,8.58)    | 6.98(6.73,7.24)    | 5.83(5.61,6.05)    | 1   |
| Saudi Arabia                       | 120,456(99,525-145,750)        | 64  | 217,842(184,391-256,805)       | 54  | 1.80(1.64,1.97)    | 2.26(1.51,3.01)    | 1.86(1.76,1.95)    | 1.96(1.72,2.21)    | 44  |
| Syrian Arab Republic               | 127,029(104,919-154,802)       | 60  | 112,794(94,899-133,012)        | 81  | 0.48(0.09,0.88)    | 3.17(2.56,3.78)    | -5.87(-7.10,-4.63) | -0.61(-1.09,-0.13) | 172 |
| Tunisia                            | 76,469(63,837-92,650)          | 86  | 89,314(76,190-105,380)         | 95  | 0.81(0.75,0.87)    | 0.07(0.03,0.12)    | 0.83(0.69,0.97)    | 0.54(0.49,0.59)    | 110 |
| Turkey                             | 724,926(614,052-856,577)       | 16  | 806,353(706,387-924,162)       | 16  | 0.97(0.85,1.09)    | -1.16(-1.49,-0.84) | 1.64(1.50,1.78)    | 0.39(0.26,0.52)    | 115 |
| United Arab Emirates               | 22,125(18,285-26,641)          | 137 | 82,042(68,683-97,957)          | 98  | 4.75(4.47,5.04)    | 9.65(7.52,11.82)   | -0.38(-1.94,1.21)  | 4.52(3.61,5.45)    | 2   |

|                                  |                                |     |                                 |     |                   |                    |                    |                    |     |
|----------------------------------|--------------------------------|-----|---------------------------------|-----|-------------------|--------------------|--------------------|--------------------|-----|
| Yemen                            | 160,748(130,979-197,888)       | 51  | 305,975(247,066-376,327)        | 43  | 2.23(2.10,2.36)   | 2.41(2.38,2.45)    | 2.08(1.91,2.26)    | 2.24(2.17,2.32)    | 29  |
| Afghanistan                      | 121,453(102,051-144,513)       | 63  | 402,588(329,942-493,979)        | 32  | 6.36(4.92,7.82)   | 3.33(3.21,3.45)    | 3.33(3.21,3.45)    | 4.21(3.74,4.69)    | 3   |
| Bangladesh                       | 746,946(659,941-855,852)       | 15  | 843,315(751,280-949,219)        | 15  | 0.99(0.86,1.11)   | 0.00(-0.04,0.05)   | 0.25(0.17,0.32)    | 0.39(0.34,0.45)    | 116 |
| Bhutan                           | 4,222(3,728-4,838)             | 166 | 3,919(3,510-4,420)              | 172 | -0.19(-1.08,0.72) | -0.15(-0.29,-0.01) | -0.49(-0.86,-0.11) | -0.26(-0.58,0.05)  | 159 |
| India                            | 6,741,743(5,920,559-7,818,255) | 2   | 9,168,248(8,096,198-10,402,187) | 2   | -0.49(-1.06,0.09) | 3.03(2.19,3.87)    | 0.54(0.18,0.91)    | 1.01(0.67,1.35)    | 78  |
| Nepal                            | 119,647(106,766-135,747)       | 65  | 153,914(137,431-173,340)        | 70  | 1.61(1.54,1.67)   | 0.42(0.34,0.50)    | 0.66(0.59,0.73)    | 0.87(0.82,0.92)    | 86  |
| Pakistan                         | 852,534(747,917-981,452)       | 13  | 1,445,432(1,282,564-1,650,686)  | 8   | 2.26(2.15,2.37)   | 1.85(1.83,1.88)    | 1.34(1.22,1.47)    | 1.86(1.81,1.92)    | 48  |
| Angola                           | 118,833(96,611-144,576)        | 66  | 283,538(226,819-352,190)        | 45  | 3.45(3.42,3.47)   | 2.95(2.93,2.98)    | 2.72(2.64,2.80)    | 3.05(3.02,3.08)    | 11  |
| Central African Republic         | 29,445(24,163-35,699)          | 130 | 48,896(40,145-59,619)           | 117 | 2.32(2.28,2.37)   | 1.83(1.78,1.88)    | 1.05(0.89,1.21)    | 1.76(1.70,1.81)    | 50  |
| Congo                            | 26,065(21,103-32,095)          | 133 | 47,146(37,958-58,574)           | 118 | 1.95(1.90,2.00)   | 1.92(1.77,2.07)    | 2.31(2.27,2.34)    | 2.08(2.03,2.13)    | 38  |
| Democratic Republic of the Congo | 386,056(308,297-476,662)       | 29  | 759,733(618,196-937,655)        | 19  | 2.24(2.22,2.27)   | 2.53(2.49,2.57)    | 2.33(2.29,2.37)    | 2.36(2.34,2.38)    | 27  |
| Equatorial Guinea                | 4,695(3,763-5,762)             | 163 | 11,722(9,327-14,723)            | 152 | 3.87(3.80,3.94)   | 3.19(3.14,3.23)    | 2.65(2.58,2.71)    | 3.23(3.19,3.28)    | 9   |
| Gabon                            | 9,034(7,360-11,056)            | 154 | 12,815(10,394-15,761)           | 150 | 1.38(1.36,1.40)   | 0.88(0.86,0.89)    | 1.41(1.29,1.52)    | 1.21(1.17,1.25)    | 65  |
| Burundi                          | 74,721(59,613-93,054)          | 88  | 130,114(102,931-161,507)        | 75  | 0.54(0.32,0.76)   | 3.04(2.75,3.34)    | 2.47(1.74,3.20)    | 2.01(1.75,2.27)    | 40  |
| Comoros                          | 5,446(4,362-6,801)             | 159 | 6,391(5,183-7,841)              | 165 | 0.61(0.58,0.65)   | 0.42(0.40,0.44)    | 0.66(0.62,0.70)    | 0.55(0.53,0.57)    | 109 |
| Djibouti                         | 6,136(4,857-7,701)             | 158 | 11,220(9,150-14,025)            | 155 | 1.37(1.12,1.62)   | 2.24(1.97,2.52)    | 2.71(2.63,2.78)    | 2.15(2.03,2.27)    | 35  |
| Eritrea                          | 36,715(29,809-45,281)          | 124 | 67,275(53,973-83,632)           | 101 | 3.03(2.84,3.22)   | 2.07(1.95,2.19)    | 1.31(1.13,1.48)    | 2.14(2.01,2.26)    | 36  |
| Ethiopia                         | 526,390(418,961-667,332)       | 22  | 920,194(711,280-1,185,181)      | 13  | 1.87(1.72,2.03)   | 1.57(1.49,1.65)    | 2.69(2.47,2.92)    | 2.01(1.92,2.10)    | 41  |
| Kenya                            | 217,808(168,703-281,643)       | 43  | 379,630(297,974-482,528)        | 34  | 1.69(1.50,1.89)   | 2.03(1.91,2.15)    | 2.25(2.02,2.49)    | 1.98(1.86,2.10)    | 42  |
| Madagascar                       | 224,614(180,275-286,350)       | 40  | 333,457(269,547-409,338)        | 40  | 2.15(2.01,2.29)   | 0.59(0.43,0.75)    | 1.43(1.32,1.54)    | 1.33(1.24,1.41)    | 63  |
| Malawi                           | 103,714(82,102-129,527)        | 72  | 178,595(141,627-223,594)        | 64  | 0.70(0.37,1.03)   | 2.29(2.26,2.32)    | 2.61(2.48,2.74)    | 1.89(1.78,2.01)    | 45  |
| Mauritius                        | 12,311(10,694-14,197)          | 145 | 11,592(10,343-13,019)           | 154 | 0.52(0.47,0.56)   | -0.50(-0.52,-0.48) | -0.58(-0.64,-0.52) | -0.21(-0.24,-0.19) | 156 |
| Mozambique                       | 152,682(122,367-190,954)       | 54  | 327,611(259,686-415,048)        | 42  | 2.89(2.39,3.39)   | 2.29(2.22,2.36)    | 2.83(2.75,2.90)    | 2.65(2.49,2.81)    | 15  |
| Rwanda                           | 135,684(107,487-173,699)       | 57  | 171,083(135,937-213,654)        | 65  | -0.42(-3.63,2.91) | 1.03(0.81,1.26)    | 1.03(0.81,1.26)    | 0.58(-0.45,1.62)   | 106 |
| Seychelles                       | 706(614-817)                   | 190 | 903(796-1,039)                  | 187 | 0.59(0.53,0.64)   | 0.85(0.84,0.87)    | 1.17(1.12,1.22)    | 0.87(0.84,0.89)    | 87  |
| Somalia                          | 94,676(74,494-117,286)         | 76  | 228,009(184,092-286,055)        | 53  | 3.19(3.01,3.36)   | 2.77(2.69,2.84)    | 3.45(3.37,3.52)    | 3.11(3.04,3.18)    | 10  |
| United Republic of Tanzania      | 374,332(294,714-473,508)       | 30  | 773,777(610,277-972,356)        | 18  | 2.52(2.41,2.63)   | 3.24(3.08,3.40)    | 1.96(1.75,2.18)    | 2.53(2.44,2.63)    | 19  |
| Uganda                           | 251,145(198,712-320,297)       | 36  | 517,065(401,424-658,818)        | 26  | 3.05(3.02,3.08)   | 2.33(2.29,2.37)    | 2.28(2.22,2.33)    | 2.53(2.50,2.55)    | 20  |
| Zambia                           | 63,122(50,993-78,068)          | 97  | 139,640(110,911-174,637)        | 72  | 1.36(1.13,1.58)   | 3.04(2.92,3.16)    | 4.18(3.94,4.42)    | 2.84(2.71,2.97)    | 14  |
| Botswana                         | 8,759(7,194-10,547)            | 155 | 14,953(12,045-18,710)           | 146 | 1.84(1.63,2.04)   | 1.64(1.08,2.20)    | 1.95(1.80,2.10)    | 1.77(1.58,1.97)    | 49  |
| Lesotho                          | 9,370(7,931-11,050)            | 151 | 9,643(8,337-11,146)             | 158 | 0.02(-0.07,0.12)  | -0.40(-0.46,-0.34) | 0.75(0.66,0.84)    | 0.10(0.05,0.15)    | 134 |
| Namibia                          | 9,452(7,857-11,394)            | 149 | 14,166(11,732-17,020)           | 148 | 2.21(2.05,2.37)   | 0.62(0.56,0.68)    | 1.48(1.39,1.57)    | 1.41(1.34,1.47)    | 57  |
| South Africa                     | 351,927(271,099-444,844)       | 33  | 419,275(326,299-526,850)        | 30  | 2.23(1.57,2.89)   | -4.34(-6.19,-2.46) | 5.61(4.80,6.44)    | 1.02(0.30,1.75)    | 75  |
| Eswatini                         | 8,243(6,649-10,296)            | 157 | 9,745(7,957-11,704)             | 156 | 2.25(1.93,2.56)   | -0.40(-0.58,-0.23) | -0.13(-0.24,-0.02) | 0.56(0.43,0.69)    | 108 |
| Zimbabwe                         | 62,986(51,666-76,848)          | 98  | 86,745(72,409-104,297)          | 97  | 0.48(0.42,0.53)   | 0.73(0.62,0.84)    | 2.24(2.14,2.33)    | 1.11(1.06,1.17)    | 69  |
| Benin                            | 44,689(35,762-55,807)          | 113 | 104,460(82,930-130,567)         | 87  | 2.61(2.47,2.75)   | 2.94(2.90,2.99)    | 3.48(3.38,3.57)    | 2.98(2.92,3.04)    | 12  |
| Burkina Faso                     | 83,011(66,381-102,800)         | 82  | 189,301(150,505-240,084)        | 62  | 2.17(2.12,2.21)   | 3.08(2.96,3.20)    | 3.49(3.42,3.56)    | 2.89(2.84,2.93)    | 13  |
| Cameroon                         | 83,858(69,162-103,392)         | 81  | 213,297(171,688-266,029)        | 56  | 2.71(2.64,2.78)   | 4.09(4.00,4.19)    | 3.16(3.09,3.22)    | 3.29(3.25,3.34)    | 8   |

|                              |                            |     |                                |     |                    |                    |                    |                    |     |
|------------------------------|----------------------------|-----|--------------------------------|-----|--------------------|--------------------|--------------------|--------------------|-----|
| Cabo Verde                   | 2,952(2,363-3,659)         | 175 | 3,496(2,874-4,295)             | 174 | 1.11(1.02,1.19)    | 0.00(-0.09,0.08)   | 0.79(0.68,0.89)    | 0.59(0.53,0.65)    | 105 |
| Chad                         | 46,702(38,037-57,193)      | 111 | 130,256(103,658-164,144)       | 74  | 2.89(2.85,2.92)    | 3.86(3.79,3.93)    | 4.15(4.07,4.22)    | 3.61(3.57,3.64)    | 4   |
| Cote d'Ivoire                | 110,224(88,941-138,525)    | 69  | 217,564(175,044-272,646)       | 55  | 3.14(2.86,3.43)    | 1.84(1.73,1.94)    | 2.18(1.95,2.40)    | 2.39(2.26,2.52)    | 26  |
| Gambia                       | 8,674(6,926-10,875)        | 156 | 17,391(13,987-21,447)          | 142 | 2.32(2.16,2.47)    | 2.46(2.42,2.50)    | 2.60(2.48,2.72)    | 2.43(2.36,2.50)    | 25  |
| Ghana                        | 102,040(81,310-127,777)    | 73  | 192,666(156,136-237,137)       | 60  | 1.52(1.45,1.58)    | 2.43(2.38,2.49)    | 2.76(2.65,2.87)    | 2.24(2.19,2.29)    | 30  |
| Guinea                       | 60,388(48,997-76,179)      | 102 | 115,879(93,303-147,428)        | 79  | 2.86(2.17,3.55)    | 1.24(1.10,1.38)    | 2.66(2.56,2.76)    | 2.20(1.98,2.43)    | 31  |
| Guinea-Bissau                | 9,412(7,658-11,574)        | 150 | 15,303(12,380-18,721)          | 145 | 1.48(1.38,1.58)    | 1.53(1.47,1.59)    | 2.11(2.05,2.17)    | 1.68(1.63,1.72)    | 52  |
| Liberia                      | 17,224(13,714-21,590)      | 142 | 34,054(27,167-42,581)          | 131 | 2.83(0.96,4.74)    | 2.46(2.17,2.75)    | 1.60(1.08,2.11)    | 2.31(1.69,2.93)    | 28  |
| Mali                         | 63,142(52,102-77,873)      | 96  | 164,334(133,100-205,732)       | 66  | 2.07(1.58,2.56)    | 3.71(3.63,3.80)    | 4.30(3.98,4.61)    | 3.38(3.19,3.57)    | 7   |
| Mauritania                   | 23,163(18,337-29,462)      | 135 | 39,778(31,795-50,355)          | 125 | 1.96(1.91,2.01)    | 2.03(2.02,2.05)    | 1.67(1.64,1.70)    | 1.88(1.86,1.90)    | 46  |
| Niger                        | 80,227(64,096-100,290)     | 84  | 211,162(167,642-267,839)       | 57  | 2.98(2.96,3.01)    | 3.54(3.50,3.58)    | 3.77(3.72,3.81)    | 3.41(3.39,3.43)    | 6   |
| Nigeria                      | 994,196(792,681-1,255,648) | 9   | 2,048,973(1,626,075-2,614,328) | 6   | 2.39(2.11,2.68)    | 3.16(2.93,3.39)    | 2.15(2.06,2.23)    | 2.50(2.37,2.62)    | 22  |
| Sao Tome and Principe        | 1,389(1,120-1,717)         | 181 | 1,758(1,443-2,115)             | 180 | 1.44(1.11,1.77)    | 0.35(0.30,0.40)    | 0.63(0.57,0.69)    | 0.79(0.68,0.89)    | 91  |
| Senegal                      | 59,774(48,905-73,938)      | 103 | 105,257(85,156-130,676)        | 86  | 1.51(1.42,1.61)    | 2.09(2.06,2.12)    | 2.40(2.32,2.49)    | 1.98(1.94,2.03)    | 43  |
| Sierra Leone                 | 32,821(26,638-40,889)      | 127 | 64,952(52,451-80,844)          | 107 | 1.05(0.81,1.29)    | 3.36(2.98,3.74)    | 2.69(2.46,2.93)    | 2.44(2.26,2.63)    | 24  |
| Togo                         | 37,138(29,431-46,929)      | 122 | 68,757(54,977-85,885)          | 100 | 2.30(2.19,2.41)    | 1.93(1.83,2.04)    | 2.33(2.26,2.40)    | 2.16(2.11,2.22)    | 34  |
| American Samoa               | 579(483-700)               | 192 | 602(503-716)                   | 192 | 0.84(0.61,1.08)    | -0.28(-0.52,-0.05) | 0.12(-0.92,1.16)   | 0.23(-0.11,0.57)   | 125 |
| Bermuda                      | 613(509-737)               | 191 | 528(442-620)                   | 195 | 0.11(0.06,0.16)    | -0.31(-0.41,-0.21) | -1.29(-1.48,-1.10) | -0.48(-0.55,-0.41) | 166 |
| Cook Islands                 | 232(193-281)               | 199 | 193(161-226)                   | 199 | -1.41(-1.62,-1.20) | -0.24(-0.37,-0.12) | -0.07(-0.32,0.18)  | -0.58(-0.71,-0.46) | 170 |
| Greenland                    | 922(765-1,110)             | 188 | 729(632-853)                   | 191 | 0.25(-0.42,0.91)   | -1.87(-2.04,-1.69) | -0.78(-0.86,-0.69) | -0.87(-1.09,-0.65) | 181 |
| Guam                         | 1,597(1,329-1,930)         | 180 | 1,824(1,530-2,168)             | 178 | 1.34(1.19,1.50)    | -0.53(-0.68,-0.38) | 0.92(0.69,1.16)    | 0.51(0.40,0.63)    | 112 |
| Monaco                       | 289(261-321)               | 197 | 359(322-400)                   | 197 | 0.86(0.81,0.90)    | 0.70(0.65,0.76)    | 0.72(0.68,0.76)    | 0.76(0.73,0.78)    | 95  |
| Nauru                        | 123(104-148)               | 201 | 119(98-143)                    | 202 | -0.44(-0.59,-0.29) | -0.77(-0.88,-0.66) | 1.19(0.27,2.11)    | -0.05(-0.34,0.24)  | 146 |
| Niue                         | 27(23-33)                  | 203 | 18(15-21)                      | 203 | -3.10(-3.26,-2.95) | -2.14(-2.32,-1.96) | 1.56(0.93,2.20)    | -1.28(-1.51,-1.04) | 191 |
| Northern Mariana Islands     | 511(431-607)               | 196 | 417(353-488)                   | 196 | 3.35(3.01,3.68)    | -3.00(-3.13,-2.87) | -2.82(-3.07,-2.57) | -0.69(-0.86,-0.52) | 176 |
| Palau                        | 178(151-207)               | 200 | 171(149-196)                   | 200 | 1.63(1.49,1.77)    | -1.34(-1.70,-0.98) | -0.49(-0.66,-0.31) | -0.09(-0.22,0.05)  | 149 |
| Puerto Rico                  | 57,498(46,711-69,637)      | 105 | 36,419(30,697-43,275)          | 129 | 0.12(0.03,0.21)    | -1.81(-1.93,-1.68) | -3.13(-3.37,-2.89) | -1.60(-1.69,-1.51) | 199 |
| Saint Kitts and Nevis        | 577(462-713)               | 193 | 596(490-727)                   | 193 | 0.04(-0.17,0.25)   | 0.30(0.23,0.38)    | 0.16(-0.07,0.38)   | 0.16(0.04,0.27)    | 130 |
| San Marino                   | 244(218-276)               | 198 | 324(288-364)                   | 198 | 1.36(1.34,1.37)    | 1.12(1.06,1.18)    | 0.52(0.49,0.55)    | 0.99(0.97,1.02)    | 80  |
| Tokelau                      | 21(17-26)                  | 204 | 16(14-20)                      | 204 | -2.29(-3.14,-1.42) | -2.80(-3.60,-2.00) | 1.91(1.45,2.37)    | -0.95(-1.39,-0.52) | 183 |
| Tuvalu                       | 104(90-121)                | 202 | 127(106-150)                   | 201 | -0.46(-0.58,-0.35) | 0.35(0.27,0.44)    | 2.53(1.81,3.26)    | 0.74(0.52,0.97)    | 97  |
| United States Virgin Islands | 1,258(1,028-1,560)         | 185 | 991(824-1,191)                 | 186 | -0.34(-0.38,-0.29) | -1.16(-1.18,-1.13) | -0.87(-1.04,-0.70) | -0.81(-0.87,-0.76) | 180 |
| South Sudan                  | 68,738(55,252-86,177)      | 91  | 97,351(77,174-122,037)         | 90  | 1.54(1.35,1.74)    | 1.97(1.92,2.01)    | -0.07(-0.58,0.44)  | 1.20(1.03,1.37)    | 66  |
| Sudan                        | 219,167(174,376-272,157)   | 42  | 400,310(325,216-499,438)       | 33  | 2.92(2.79,3.05)    | 1.51(1.38,1.65)    | 1.95(1.76,2.14)    | 2.08(1.98,2.17)    | 39  |

**sTable 4.** The incident cases and age-standardized rate of incidence attributable to six immune mediated inflammatory diseases according to SDI regions and its temporal trends from 1990 to 2019.

|                                   | 1990                   |      | 2019                   |      | 1990-1999          |                    | 2000-2009          |                    | 2010-2019   |             | 1990-2019 |  |
|-----------------------------------|------------------------|------|------------------------|------|--------------------|--------------------|--------------------|--------------------|-------------|-------------|-----------|--|
|                                   | N(95%CI)               | Rank | N(95%CI)               | Rank | AAPC(95%CI)        | AAPC(95%CI)        | AAPC(95%CI)        | AAPC(95%CI)        | AAPC(95%CI) | AAPC(95%CI) | Rank      |  |
| <b>Age standardized rate</b>      |                        |      |                        |      |                    |                    |                    |                    |             |             |           |  |
| <i>Asthma</i>                     |                        |      |                        |      |                    |                    |                    |                    |             |             |           |  |
| High-middle SDI                   | 559.79(446.64-704.44)  | 3    | 474.27(358.92-614.35)  | 4    | -1.15(-1.58,-0.72) | -1.29(-1.58,-1.01) | 1.33(0.74,1.92)    | -0.44(-0.71,-0.16) | 5           |             |           |  |
| High SDI                          | 933.66(749.54-1169.89) | 1    | 897.36(711.33-1111.67) | 1    | -1.87(-2.04,-1.70) | 0.95(0.67,1.24)    | 0.38(0.21,0.55)    | -0.10(-0.23,0.04)  | 1           |             |           |  |
| Low-middle SDI                    | 475.36(395.35-574.04)  | 5    | 415.97(340.39-514.53)  | 5    | -1.61(-1.73,-1.48) | 0.15(-0.19,0.49)   | 0.35(-0.41,1.11)   | -0.35(-0.62,-0.08) | 4           |             |           |  |
| Low SDI                           | 594.50(491.39-718.57)  | 2    | 544.09(441.51-666.93)  | 2    | -0.90(-1.02,-0.78) | -0.03(-0.16,0.10)  | 0.22(-0.21,0.65)   | -0.26(-0.40,-0.11) | 2           |             |           |  |
| Middle SDI                        | 523.33(417.01-662.57)  | 4    | 483.85(375.43-623.84)  | 3    | -1.19(-1.28,-1.10) | -0.57(-0.68,-0.46) | 0.95(0.05,1.87)    | -0.29(-0.58,0.00)  | 3           |             |           |  |
| <i>Inflammatory bowel disease</i> |                        |      |                        |      |                    |                    |                    |                    |             |             |           |  |
| High-middle SDI                   | 6.12(5.36-6.99)        | 2    | 5.58(4.98-6.29)        | 2    | -0.82(-1.02,-0.61) | -0.21(-0.27,-0.15) | 0.10(0.05,0.15)    | -0.33(-0.41,-0.25) | 5           |             |           |  |
| High SDI                          | 18.96(16.73-21.58)     | 1    | 17.61(16.03-19.41)     | 1    | -1.50(-1.61,-1.38) | 0.40(0.37,0.43)    | 0.20(0.16,0.23)    | -0.25(-0.29,-0.22) | 4           |             |           |  |
| Low-middle SDI                    | 2.00(1.70-2.40)        | 3    | 2.22(1.89-2.66)        | 4    | 0.96(0.42,1.50)    | 0.41(0.31,0.52)    | -0.35(-0.59,-0.11) | 0.32(0.13,0.51)    | 2           |             |           |  |
| Low SDI                           | 1.46(1.23-1.77)        | 5    | 1.59(1.35-1.91)        | 5    | 0.34(0.30,0.38)    | 0.43(0.37,0.48)    | 0.14(-0.02,0.30)   | 0.30(0.23,0.37)    | 3           |             |           |  |
| Middle SDI                        | 1.83(1.58-2.15)        | 4    | 2.42(2.06-2.87)        | 3    | 1.34(1.14,1.53)    | 0.51(0.33,0.69)    | 0.88(0.82,0.93)    | 0.96(0.87,1.05)    | 1           |             |           |  |
| <i>Multiple sclerosis</i>         |                        |      |                        |      |                    |                    |                    |                    |             |             |           |  |
| High-middle SDI                   | 0.88(0.77-0.99)        | 2    | 0.81(0.71-0.90)        | 2    | -0.63(-0.71,-0.55) | -0.07(-0.09,-0.05) | -0.19(-0.25,-0.13) | -0.31(-0.34,-0.27) | 5           |             |           |  |
| High SDI                          | 2.29(2.02-2.56)        | 1    | 2.53(2.29-2.76)        | 1    | 0.17(0.13,0.21)    | 0.30(0.28,0.32)    | 0.54(0.52,0.56)    | 0.35(0.33,0.37)    | 3           |             |           |  |
| Low-middle SDI                    | 0.37(0.31-0.44)        | 3    | 0.42(0.34-0.49)        | 4    | 0.16(0.14,0.17)    | 0.45(0.44,0.47)    | 0.58(0.54,0.62)    | 0.41(0.39,0.42)    | 2           |             |           |  |
| Low SDI                           | 0.37(0.30-0.44)        | 5    | 0.40(0.33-0.48)        | 5    | 0.13(0.05,0.20)    | 0.33(0.25,0.40)    | 0.62(0.60,0.65)    | 0.35(0.31,0.39)    | 4           |             |           |  |
| Middle SDI                        | 0.37(0.31-0.43)        | 4    | 0.44(0.37-0.51)        | 3    | 0.26(0.21,0.30)    | 0.87(0.85,0.88)    | 0.67(0.63,0.71)    | 0.62(0.60,0.64)    | 1           |             |           |  |
| <i>Rheumatoid arthritis</i>       |                        |      |                        |      |                    |                    |                    |                    |             |             |           |  |
| High-middle SDI                   | 10.17(9.26-11.23)      | 5    | 11.24(10.24-12.38)     | 5    | 0.40(0.37,0.42)    | 0.60(0.59,0.61)    | -0.02(-0.09,0.05)  | 0.34(0.32,0.37)    | 1           |             |           |  |
| High SDI                          | 15.95(14.73-17.25)     | 1    | 17.13(15.77-18.61)     | 1    | 0.34(0.20,0.47)    | 0.54(0.47,0.62)    | -0.28(-0.42,-0.15) | 0.22(0.15,0.30)    | 5           |             |           |  |
| Low-middle SDI                    | 13.89(12.63-15.29)     | 2    | 15.31(13.90-16.84)     | 2    | 0.28(0.27,0.29)    | 0.38(0.37,0.39)    | 0.30(0.22,0.39)    | 0.33(0.30,0.36)    | 3           |             |           |  |
| Low SDI                           | 12.01(10.85-13.21)     | 3    | 13.27(12.06-14.56)     | 3    | 0.12(-0.01,0.24)   | 0.50(0.49,0.51)    | 0.37(0.33,0.40)    | 0.34(0.30,0.38)    | 2           |             |           |  |
| Middle SDI                        | 10.65(9.63-11.76)      | 4    | 11.48(10.41-12.69)     | 4    | 0.38(0.37,0.39)    | 0.38(0.37,0.39)    | 0.01(-0.16,0.17)   | 0.26(0.21,0.31)    | 4           |             |           |  |
| <i>Psoriasis</i>                  |                        |      |                        |      |                    |                    |                    |                    |             |             |           |  |
| High-middle SDI                   | 84.21(81.14-87.19)     | 2    | 69.48(67.10-71.89)     | 2    | -0.74(-0.76,-0.73) | -0.57(-0.60,-0.54) | -0.68(-0.69,-0.67) | -0.66(-0.67,-0.64) | 4           |             |           |  |
| High SDI                          | 125.33(121.17-129.37)  | 1    | 112.58(108.89-116.07)  | 1    | -0.31(-0.34,-0.27) | -0.57(-0.59,-0.54) | -0.26(-0.29,-0.23) | -0.38(-0.40,-0.36) | 1           |             |           |  |
| Low-middle SDI                    | 52.75(50.95-54.63)     | 4    | 45.45(43.80-47.02)     | 3    | -0.33(-0.34,-0.32) | -0.51(-0.54,-0.48) | -0.72(-0.74,-0.71) | -0.52(-0.53,-0.51) | 3           |             |           |  |
| Low SDI                           | 45.21(43.57-46.85)     | 5    | 39.82(38.40-41.29)     | 5    | -0.19(-0.23,-0.16) | -0.43(-0.44,-0.42) | -0.67(-0.73,-0.61) | -0.44(-0.46,-0.42) | 2           |             |           |  |
| Middle SDI                        | 53.26(51.39-55.18)     | 3    | 43.45(41.94-44.94)     | 4    | -0.63(-0.64,-0.62) | -0.68(-0.71,-0.66) | -0.79(-0.79,-0.78) | -0.70(-0.71,-0.69) | 5           |             |           |  |
| <i>Atopic dermatitis</i>          |                        |      |                        |      |                    |                    |                    |                    |             |             |           |  |
| High-middle SDI                   | 352.30(335.52-369.96)  | 3    | 370.26(352.74-388.58)  | 2    | 0.19(0.17,0.21)    | 0.30(0.29,0.32)    | -0.01(-0.02,0.01)  | 0.17(0.16,0.18)    | 1           |             |           |  |
| High SDI                          | 409.13(385.75-432.82)  | 1    | 394.45(371.60-417.31)  | 1    | 0.14(0.06,0.22)    | -0.52(-0.57,-0.48) | -0.05(-0.09,0.00)  | -0.14(-0.18,-0.10) | 4           |             |           |  |

|                                          |                                 |   |                                  |   |                    |                    |                    |                    |   |
|------------------------------------------|---------------------------------|---|----------------------------------|---|--------------------|--------------------|--------------------|--------------------|---|
| Low-middle SDI                           | 299.54(283.79-316.48)           | 4 | 287.48(272.29-303.44)            | 4 | -0.03(-0.04,-0.02) | -0.13(-0.13,-0.12) | -0.27(-0.29,-0.25) | -0.14(-0.15,-0.14) | 5 |
| Low SDI                                  | 205.73(194.46-218.17)           | 5 | 199.38(188.75-211.08)            | 5 | -0.06(-0.09,-0.04) | -0.08(-0.08,-0.07) | -0.18(-0.19,-0.17) | -0.11(-0.12,-0.10) | 2 |
| Middle SDI                               | 375.57(359.57-390.98)           | 2 | 361.82(345.76-377.46)            | 3 | -0.11(-0.12,-0.11) | -0.11(-0.11,-0.11) | -0.17(-0.18,-0.16) | -0.13(-0.13,-0.13) | 3 |
| <b>Number of incident cases</b>          |                                 |   |                                  |   |                    |                    |                    |                    |   |
| <b><i>Asthma</i></b>                     |                                 |   |                                  |   |                    |                    |                    |                    |   |
| High-middle SDI                          | 6,242,717(5,020,769-7,876,345)  | 3 | 5,410,537(4,349,433-6,726,613)   | 5 | -1.08(-1.51,-0.66) | -1.46(-1.66,-1.26) | 1.52(1.07,1.98)    | -0.40(-0.63,-0.17) | 5 |
| High SDI                                 | 6,920,037(5,729,678-8,410,662)  | 2 | 7,056,076(5,900,059-8,406,846)   | 3 | -1.88(-2.04,-1.72) | 1.10(0.86,1.34)    | 0.80(0.65,0.95)    | 0.09(-0.03,0.20)   | 4 |
| Low-middle SDI                           | 5,682,545(4,523,305-7,225,234)  | 4 | 7,096,394(5,718,776-8,795,881)   | 2 | -0.28(-0.42,-0.14) | 1.57(1.22,1.92)    | 1.27(0.55,2.00)    | 0.89(0.62,1.15)    | 2 |
| Low SDI                                  | 3,763,030(2,966,775-4,825,345)  | 5 | 7,016,216(5,410,570-9,113,992)   | 4 | 1.77(1.63,1.90)    | 2.77(2.58,2.96)    | 2.17(1.71,2.63)    | 2.24(2.08,2.40)    | 1 |
| Middle SDI                               | 9,529,902(7,357,881-12,466,457) | 1 | 10,369,656(8,174,206-13,107,057) | 1 | -0.41(-0.83,0.02)  | -0.17(-0.38,0.03)  | 1.84(1.42,2.25)    | 0.38(0.16,0.60)    | 3 |
| <b><i>Inflammatory bowel disease</i></b> |                                 |   |                                  |   |                    |                    |                    |                    |   |
| High-middle SDI                          | 71,474(62,545-81,510)           | 2 | 94,592(84,133-107,200)           | 2 | 0.79(0.65,0.92)    | 1.17(1.06,1.28)    | 0.90(0.81,0.99)    | 0.95(0.89,1.02)    | 4 |
| High SDI                                 | 171,841(151,878-195,746)        | 1 | 196,451(179,556-217,510)         | 1 | -0.74(-0.88,-0.61) | 1.38(1.33,1.42)    | 0.89(0.83,0.95)    | 0.47(0.42,0.52)    | 5 |
| Low-middle SDI                           | 17,434(14,532-20,935)           | 3 | 36,903(31,053-44,312)            | 4 | 3.31(2.50,4.14)    | 2.69(2.58,2.81)    | 1.66(1.38,1.94)    | 2.56(2.29,2.84)    | 3 |
| Low SDI                                  | 5,279(4,395-6,379)              | 4 | 12,776(10,613-15,507)            | 5 | 2.87(2.73,3.02)    | 3.28(3.20,3.36)    | 3.00(2.84,3.15)    | 3.07(2.99,3.15)    | 1 |
| Middle SDI                               | 27,459(23,259-32,310)           | 5 | 63,681(54,080-75,590)            | 3 | 3.99(3.55,4.44)    | 2.57(2.50,2.63)    | 2.33(2.17,2.50)    | 2.94(2.79,3.09)    | 2 |
| <b><i>Multiple sclerosis</i></b>         |                                 |   |                                  |   |                    |                    |                    |                    |   |
| High-middle SDI                          | 10,581(9,261-11,867)            | 2 | 12,330(10,846-13,773)            | 2 | 0.71(0.65,0.77)    | 0.84(0.76,0.93)    | -0.08(-0.18,0.02)  | 0.50(0.45,0.55)    | 5 |
| High SDI                                 | 20,101(17,824-22,508)           | 1 | 24,240(21,900-26,507)            | 1 | 0.52(0.37,0.68)    | 0.69(0.62,0.75)    | 0.80(0.77,0.82)    | 0.67(0.62,0.73)    | 4 |
| Low-middle SDI                           | 3,647(2,952-4,399)              | 4 | 7,448(6,088-8,850)               | 4 | 2.48(2.47,2.48)    | 2.54(2.51,2.58)    | 2.44(2.41,2.47)    | 2.49(2.47,2.50)    | 2 |
| Low SDI                                  | 1,542(1,237-1,874)              | 5 | 3,951(3,192-4,745)               | 5 | 3.03(2.93,3.12)    | 3.31(3.24,3.38)    | 3.60(3.57,3.63)    | 3.30(3.26,3.34)    | 1 |
| Middle SDI                               | 5,965(4,920-7,066)              | 3 | 11,344(9,469-13,171)             | 3 | 2.43(2.33,2.54)    | 2.54(2.49,2.59)    | 1.72(1.65,1.79)    | 2.26(2.21,2.31)    | 3 |
| <b><i>Rheumatoid arthritis</i></b>       |                                 |   |                                  |   |                    |                    |                    |                    |   |
| High-middle SDI                          | 118,141(107,393-130,451)        | 3 | 199,084(179,889-219,047)         | 4 | 2.05(1.87,2.22)    | 2.14(2.07,2.22)    | 1.09(0.94,1.25)    | 1.79(1.70,1.87)    | 4 |
| High SDI                                 | 149,344(138,368-161,540)        | 2 | 232,587(214,481-252,315)         | 3 | 1.66(1.52,1.79)    | 1.95(1.88,2.02)    | 0.87(0.71,1.02)    | 1.52(1.44,1.60)    | 5 |
| Low-middle SDI                           | 109,206(99,111-119,978)         | 4 | 242,444(219,999-266,778)         | 2 | 2.67(2.65,2.69)    | 2.86(2.84,2.89)    | 2.75(2.69,2.81)    | 2.77(2.74,2.79)    | 2 |
| Low SDI                                  | 38,403(34,587-42,429)           | 5 | 94,503(85,249-104,582)           | 5 | 2.54(2.47,2.61)    | 3.33(3.29,3.38)    | 3.56(3.53,3.58)    | 3.15(3.12,3.17)    | 1 |
| Middle SDI                               | 152,154(137,557-168,806)        | 1 | 305,363(275,479-337,878)         | 1 | 2.77(2.76,2.78)    | 2.64(2.63,2.65)    | 1.83(1.74,1.92)    | 2.43(2.40,2.46)    | 3 |
| <b><i>Psoriasis</i></b>                  |                                 |   |                                  |   |                    |                    |                    |                    |   |
| High-middle SDI                          | 976,580(940,735-1,011,088)      | 2 | 1,107,305(1,066,590-1,146,738)   | 2 | 0.50(0.49,0.52)    | 0.56(0.54,0.58)    | 0.22(0.20,0.24)    | 0.44(0.43,0.45)    | 4 |
| High SDI                                 | 1,074,706(1,038,316-1,110,451)  | 1 | 1,222,661(1,181,243-1,262,575)   | 1 | 0.50(0.47,0.53)    | 0.40(0.38,0.42)    | 0.41(0.37,0.45)    | 0.43(0.42,0.45)    | 5 |
| Low-middle SDI                           | 542,259(524,003-562,547)        | 4 | 785,657(758,178-813,890)         | 4 | 1.62(1.59,1.64)    | 1.30(1.28,1.32)    | 0.92(0.90,0.95)    | 1.28(1.27,1.30)    | 2 |
| Low SDI                                  | 210,360(202,895-218,246)        | 5 | 400,643(386,621-416,424)         | 5 | 2.42(2.26,2.58)    | 2.35(2.31,2.39)    | 1.96(1.93,1.99)    | 2.24(2.18,2.29)    | 1 |
| Middle SDI                               | 847,467(818,351-878,420)        | 3 | 1,103,743(1,063,920-1,142,626)   | 3 | 1.25(1.24,1.26)    | 0.92(0.88,0.97)    | 0.55(0.52,0.58)    | 0.91(0.89,0.93)    | 3 |
| <b><i>Atopic dermatitis</i></b>          |                                 |   |                                  |   |                    |                    |                    |                    |   |
| High-middle SDI                          | 3,970,974(3,778,337-4,166,089)  | 3 | 4,752,301(4,543,971-4,954,992)   | 3 | 0.30(0.27,0.33)    | 0.84(0.82,0.86)    | 0.69(0.66,0.72)    | 0.62(0.60,0.64)    | 4 |
| High SDI                                 | 2,972,029(2,818,698-3,125,298)  | 4 | 3,356,190(3,198,388-3,509,968)   | 4 | 0.54(0.50,0.59)    | 0.13(0.10,0.16)    | 0.51(0.49,0.52)    | 0.41(0.39,0.43)    | 5 |
| Low-middle SDI                           | 4,075,278(3,843,072-4,337,720)  | 2 | 5,138,236(4,862,771-5,429,596)   | 2 | 1.24(1.20,1.28)    | 0.83(0.81,0.84)    | 0.34(0.32,0.35)    | 0.80(0.79,0.82)    | 2 |

|            |                                |   |                                |   |                 |                 |                 |                 |   |
|------------|--------------------------------|---|--------------------------------|---|-----------------|-----------------|-----------------|-----------------|---|
| Low SDI    | 1,503,649(1,413,742-1,605,800) | 5 | 2,874,078(2,707,609-3,064,170) | 5 | 2.53(2.52,2.54) | 2.50(2.47,2.53) | 1.73(1.65,1.82) | 2.26(2.23,2.30) | 1 |
| Middle SDI | 6,654,491(6,353,883-6,958,746) | 1 | 8,310,047(7,938,439-8,656,340) | 1 | 0.87(0.85,0.89) | 0.75(0.70,0.80) | 0.69(0.68,0.70) | 0.77(0.75,0.78) | 3 |

---

**sTable 5.** The incident cases and age-standardized rate of incidence attributable to six immune mediated inflammatory diseases according to GBD regions and its temporal trends from 1990 to 2019.

|                                          | 1990                     |      | 2019                     |      | 1990-1999          |                    | 2000-2009          |                    | 2010-2019   |             | 1990-2019 |  |
|------------------------------------------|--------------------------|------|--------------------------|------|--------------------|--------------------|--------------------|--------------------|-------------|-------------|-----------|--|
|                                          | N(95%CI)                 | Rank | N(95%CI)                 | Rank | AAPC(95%CI)        | AAPC(95%CI)        | AAPC(95%CI)        | AAPC(95%CI)        | AAPC(95%CI) | AAPC(95%CI) | Rank      |  |
| <b>Age standardized rate</b>             |                          |      |                          |      |                    |                    |                    |                    |             |             |           |  |
| <b><i>Asthma</i></b>                     |                          |      |                          |      |                    |                    |                    |                    |             |             |           |  |
| East Asia                                | 400.46(301.23-534.05)    | 20   | 361.24(264.84-499.83)    | 20   | -2.55(-2.89,-2.21) | -1.76(-2.20,-1.32) | 2.81(-1.79,7.64)   | -0.54(-2.00,0.93)  | 13          |             |           |  |
| Southeast Asia                           | 576.89(474.49-709.35)    | 17   | 553.39(445.75-698.10)    | 13   | -0.54(-0.60,-0.48) | -0.02(-0.16,0.12)  | 0.13(0.00,0.27)    | -0.17(-0.23,-0.10) | 5           |             |           |  |
| Oceania                                  | 781.11(662.50-910.50)    | 7    | 665.36(567.70-777.32)    | 6    | -0.22(-0.26,-0.17) | -1.04(-1.13,-0.96) | -0.29(-0.49,-0.09) | -0.54(-0.61,-0.47) | 14          |             |           |  |
| Central Asia                             | 406.44(328.07-503.31)    | 19   | 379.29(293.17-489.20)    | 19   | -0.34(-0.41,-0.28) | -0.89(-1.03,-0.74) | 0.60(0.48,0.72)    | -0.22(-0.28,-0.15) | 6           |             |           |  |
| Central Europe                           | 714.15(592.85-873.90)    | 11   | 616.99(483.35-789.96)    | 8    | -0.45(-0.58,-0.33) | -0.85(-0.91,-0.78) | -0.12(-0.30,0.05)  | -0.50(-0.58,-0.43) | 12          |             |           |  |
| Eastern Europe                           | 655.11(519.74-826.37)    | 12   | 461.89(338.65-613.63)    | 18   | -1.14(-1.32,-0.95) | -2.46(-2.64,-2.28) | 0.31(-0.07,0.68)   | -1.17(-1.33,-1.01) | 20          |             |           |  |
| High-income Asia Pacific                 | 852.87(707.47-1042.26)   | 5    | 554.49(421.06-724.34)    | 12   | -2.16(-2.37,-1.95) | -2.95(-3.13,-2.77) | 0.82(0.64,1.01)    | -1.56(-1.68,-1.45) | 21          |             |           |  |
| Australasia                              | 784.22(622.41-957.42)    | 6    | 615.20(473.25-790.74)    | 9    | 0.35(-0.06,0.77)   | -3.07(-3.34,-2.81) | 0.01(-0.22,0.24)   | -0.87(-1.05,-0.68) | 19          |             |           |  |
| Western Europe                           | 627.59(526.75-750.60)    | 13   | 512.21(397.33-640.62)    | 16   | -1.51(-2.13,-0.89) | -0.49(-0.56,-0.42) | -0.18(-0.69,0.33)  | -0.71(-0.97,-0.46) | 17          |             |           |  |
| Southern Latin America                   | 729.20(612.38-887.35)    | 9    | 742.26(592.41-935.55)    | 5    | 0.23(0.02,0.43)    | 0.02(0.00,0.04)    | 0.02(0.00,0.04)    | 0.07(0.00,0.13)    | 2           |             |           |  |
| High-income North America                | 1351.69(1038.96-1769.35) | 1    | 1474.11(1188.89-1810.73) | 1    | -2.63(-3.02,-2.24) | 2.55(2.17,2.93)    | 0.73(0.50,0.97)    | 0.37(0.16,0.58)    | 1           |             |           |  |
| Caribbean                                | 1008.24(804.93-1253.61)  | 3    | 938.42(741.65-1178.96)   | 2    | -0.39(-0.41,-0.37) | -0.39(-0.41,-0.37) | 0.17(0.02,0.31)    | -0.22(-0.26,-0.17) | 7           |             |           |  |
| Andean Latin America                     | 928.50(698.16-1197.35)   | 4    | 760.27(565.28-1022.67)   | 4    | -0.90(-0.97,-0.83) | -1.56(-1.60,-1.51) | 0.53(0.44,0.62)    | -0.70(-0.74,-0.66) | 16          |             |           |  |
| Central Latin America                    | 717.59(561.67-909.60)    | 10   | 583.29(427.80-775.69)    | 11   | -1.61(-1.94,-1.27) | -0.98(-1.10,-0.86) | 0.38(0.32,0.44)    | -0.75(-0.86,-0.63) | 18          |             |           |  |
| Tropical Latin America                   | 1045.37(769.77-1384.46)  | 2    | 916.11(645.54-1218.08)   | 3    | -0.65(-0.91,-0.39) | -1.36(-1.48,-1.25) | 0.83(0.53,1.13)    | -0.47(-0.61,-0.33) | 11          |             |           |  |
| North Africa and Middle East             | 613.97(502.26-748.23)    | 14   | 589.78(473.10-728.85)    | 10   | -0.32(-0.36,-0.28) | -0.53(-0.56,-0.51) | 0.55(0.43,0.68)    | -0.13(-0.17,-0.09) | 4           |             |           |  |
| South Asia                               | 388.17(325.47-459.44)    | 21   | 329.58(274.87-394.58)    | 21   | -3.32(-4.15,-2.49) | 1.84(0.53,3.16)    | -0.42(-1.00,0.16)  | -0.66(-1.18,-0.13) | 15          |             |           |  |
| Central Sub-Saharan Africa               | 585.13(480.34-707.87)    | 15   | 518.71(420.69-641.53)    | 14   | -0.46(-0.47,-0.45) | -0.66(-0.74,-0.58) | -0.08(-0.13,-0.03) | -0.41(-0.44,-0.38) | 8           |             |           |  |
| Eastern Sub-Saharan Africa               | 744.14(605.15-919.93)    | 8    | 651.85(518.29-817.23)    | 7    | -0.73(-0.82,-0.64) | -0.64(-0.66,-0.61) | 0.07(-0.01,0.15)   | -0.45(-0.49,-0.41) | 10          |             |           |  |
| Southern Sub-Saharan Africa              | 563.12(429.98-713.65)    | 18   | 496.95(376.47-641.51)    | 17   | 0.55(-0.05,1.15)   | -5.19(-6.98,-3.38) | 5.06(4.22,5.90)    | -0.03(-0.73,0.67)  | 3           |             |           |  |
| Western Sub-Saharan Africa               | 581.54(469.32-726.04)    | 16   | 514.29(408.95-658.46)    | 15   | -0.83(-1.26,-0.40) | -0.52(-0.60,-0.44) | 0.04(-0.23,0.31)   | -0.44(-0.61,-0.28) | 9           |             |           |  |
| <b><i>Inflammatory bowel disease</i></b> |                          |      |                          |      |                    |                    |                    |                    |             |             |           |  |
| East Asia                                | 1.45(1.22-1.71)          | 15   | 2.95(2.55-3.43)          | 10   | 3.23(2.93,3.53)    | 1.80(1.48,2.12)    | 2.14(2.08,2.21)    | 2.48(2.33,2.63)    | 1           |             |           |  |
| Southeast Asia                           | 0.46(0.38-0.56)          | 20   | 0.70(0.59-0.84)          | 20   | 2.55(2.42,2.67)    | 0.57(0.49,0.66)    | 1.02(0.98,1.06)    | 1.46(1.41,1.51)    | 3           |             |           |  |
| Oceania                                  | 0.44(0.36-0.52)          | 21   | 0.56(0.47-0.67)          | 21   | 0.39(0.32,0.47)    | 0.91(0.80,1.01)    | 1.14(1.06,1.22)    | 0.83(0.77,0.88)    | 5           |             |           |  |
| Central Asia                             | 5.99(5.13-7.07)          | 8    | 6.90(5.87-8.13)          | 7    | 0.35(0.20,0.49)    | 0.37(0.05,0.69)    | 0.72(0.60,0.83)    | 0.50(0.37,0.62)    | 11          |             |           |  |
| Central Europe                           | 15.78(13.61-18.19)       | 2    | 11.59(10.51-12.81)       | 5    | -2.51(-2.67,-2.35) | -0.56(-0.71,-0.41) | 0.31(0.28,0.34)    | -1.11(-1.19,-1.04) | 20          |             |           |  |
| Eastern Europe                           | 7.10(6.12-8.29)          | 6    | 7.34(6.34-8.55)          | 6    | 0.70(0.62,0.79)    | -0.04(-0.19,0.11)  | -0.17(-0.36,0.02)  | 0.16(0.07,0.25)    | 17          |             |           |  |
| High-income Asia Pacific                 | 9.25(7.88-10.91)         | 5    | 14.93(13.14-16.93)       | 4    | 4.20(3.56,4.84)    | 0.47(0.32,0.63)    | 0.68(0.58,0.77)    | 1.68(1.47,1.89)    | 2           |             |           |  |
| Australasia                              | 13.56(11.64-15.80)       | 4    | 20.03(17.79-22.57)       | 2    | 3.35(3.14,3.57)    | 0.47(0.44,0.49)    | 0.39(0.38,0.41)    | 1.35(1.28,1.42)    | 4           |             |           |  |
| Western Europe                           | 13.98(12.67-15.48)       | 3    | 16.94(15.33-18.73)       | 3    | 1.04(0.95,1.13)    | 0.58(0.55,0.62)    | 0.41(0.33,0.49)    | 0.67(0.62,0.71)    | 9           |             |           |  |
| Southern Latin America                   | 1.82(1.54-2.13)          | 13   | 1.92(1.63-2.26)          | 14   | 0.95(0.88,1.03)    | 0.20(0.18,0.23)    | -0.57(-0.68,-0.45) | 0.19(0.15,0.24)    | 16          |             |           |  |

|                                    |                    |    |                    |    |                    |                    |                    |                    |    |
|------------------------------------|--------------------|----|--------------------|----|--------------------|--------------------|--------------------|--------------------|----|
| High-income North America          | 34.88(30.59-40.02) | 1  | 24.51(22.65-26.77) | 1  | -4.49(-4.63,-4.35) | 0.60(0.31,0.89)    | -0.03(-0.11,0.04)  | -1.24(-1.37,-1.11) | 21 |
| Caribbean                          | 2.11(1.83-2.49)    | 12 | 2.63(2.24-3.14)    | 12 | 1.43(1.34,1.52)    | -0.79(-0.84,-0.74) | 1.69(1.64,1.74)    | 0.76(0.72,0.80)    | 7  |
| Andean Latin America               | 1.63(1.41-1.91)    | 14 | 1.82(1.57-2.12)    | 15 | 1.66(1.51,1.82)    | -2.09(-2.16,-2.01) | 1.61(1.53,1.69)    | 0.37(0.31,0.44)    | 13 |
| Central Latin America              | 3.16(2.74-3.66)    | 9  | 2.64(2.29-3.06)    | 11 | -1.16(-1.34,-0.97) | -1.63(-1.74,-1.52) | 0.83(0.75,0.91)    | -0.60(-0.67,-0.52) | 19 |
| Tropical Latin America             | 6.09(5.40-6.93)    | 7  | 5.25(4.60-6.03)    | 8  | -0.41(-0.56,-0.26) | -0.73(-1.44,-0.01) | -0.41(-0.50,-0.31) | -0.51(-0.74,-0.27) | 18 |
| North Africa and Middle East       | 2.95(2.59-3.38)    | 10 | 3.74(3.19-4.45)    | 9  | 1.46(1.42,1.49)    | -0.14(-0.22,-0.06) | 1.12(1.07,1.17)    | 0.83(0.79,0.86)    | 6  |
| South Asia                         | 2.15(1.79-2.64)    | 11 | 2.32(1.93-2.84)    | 13 | 0.79(0.76,0.83)    | 0.79(0.76,0.83)    | -0.82(-1.41,-0.23) | 0.29(0.10,0.47)    | 14 |
| Central Sub-Saharan Africa         | 1.04(0.88-1.26)    | 17 | 1.26(1.06-1.52)    | 17 | 0.68(0.65,0.72)    | 0.32(0.23,0.41)    | 1.16(1.00,1.32)    | 0.70(0.63,0.76)    | 8  |
| Eastern Sub-Saharan Africa         | 0.89(0.76-1.07)    | 19 | 1.04(0.88-1.25)    | 19 | 0.19(0.18,0.20)    | 0.67(0.63,0.70)    | 0.71(0.65,0.78)    | 0.54(0.51,0.56)    | 10 |
| Southern Sub-Saharan Africa        | 1.30(1.10-1.56)    | 16 | 1.37(1.17-1.65)    | 16 | 0.39(0.28,0.49)    | -0.31(-0.49,-0.12) | 0.57(0.50,0.64)    | 0.24(0.16,0.31)    | 15 |
| Western Sub-Saharan Africa         | 1.01(0.86-1.23)    | 18 | 1.17(1.00-1.41)    | 18 | 0.26(0.21,0.32)    | -0.22(-0.24,-0.20) | 1.56(1.46,1.65)    | 0.48(0.45,0.52)    | 12 |
| <b><i>Multiple sclerosis</i></b>   |                    |    |                    |    |                    |                    |                    |                    |    |
| East Asia                          | 0.18(0.15-0.22)    | 13 | 0.18(0.14-0.21)    | 20 | -0.50(-0.54,-0.47) | -0.40(-0.44,-0.36) | 0.49(0.39,0.59)    | -0.16(-0.20,-0.13) | 17 |
| Southeast Asia                     | 0.18(0.15-0.22)    | 11 | 0.18(0.15-0.21)    | 19 | -0.13(-0.15,-0.12) | -0.06(-0.08,-0.05) | 0.01(0.00,0.01)    | -0.06(-0.07,-0.05) | 16 |
| Oceania                            | 0.14(0.12-0.17)    | 17 | 0.14(0.11-0.17)    | 21 | -0.26(-0.30,-0.21) | -0.13(-0.18,-0.08) | -0.10(-0.12,-0.08) | -0.16(-0.18,-0.14) | 18 |
| Central Asia                       | 1.53(1.36-1.72)    | 18 | 1.39(1.21-1.58)    | 6  | -0.20(-0.21,-0.18) | -0.33(-0.34,-0.32) | -0.49(-0.55,-0.43) | -0.34(-0.36,-0.32) | 20 |
| Central Europe                     | 1.78(1.58-1.98)    | 12 | 1.70(1.52-1.88)    | 4  | -0.05(-0.12,0.03)  | 0.06(-0.04,0.16)   | -0.62(-0.69,-0.54) | -0.18(-0.24,-0.13) | 19 |
| Eastern Europe                     | 1.26(1.07-1.44)    | 6  | 1.05(0.89-1.22)    | 7  | -0.72(-0.79,-0.66) | -0.22(-0.26,-0.18) | -0.95(-1.16,-0.73) | -0.60(-0.68,-0.53) | 21 |
| High-income Asia Pacific           | 0.35(0.28-0.42)    | 9  | 0.36(0.29-0.44)    | 15 | 0.22(0.10,0.34)    | -0.05(-0.07,-0.03) | 0.39(0.32,0.45)    | 0.17(0.12,0.21)    | 9  |
| Australasia                        | 1.54(1.38-1.71)    | 15 | 2.09(1.82-2.35)    | 3  | 3.06(2.84,3.29)    | 0.38(0.32,0.44)    | -0.58(-0.78,-0.38) | 1.05(0.95,1.16)    | 1  |
| Western Europe                     | 2.59(2.30-2.90)    | 16 | 3.18(2.81-3.55)    | 2  | 0.84(0.78,0.89)    | 0.61(0.55,0.67)    | 0.64(0.53,0.75)    | 0.69(0.65,0.74)    | 3  |
| Southern Latin America             | 0.91(0.76-1.06)    | 10 | 0.94(0.79-1.10)    | 8  | 0.17(0.16,0.18)    | 0.10(0.09,0.12)    | 0.06(0.04,0.07)    | 0.11(0.11,0.12)    | 10 |
| High-income North America          | 3.48(3.07-3.90)    | 1  | 3.57(3.29-3.84)    | 1  | -0.36(-0.62,-0.09) | 0.29(0.28,0.30)    | 0.29(0.28,0.30)    | 0.09(0.01,0.17)    | 12 |
| Caribbean                          | 0.43(0.35-0.51)    | 8  | 0.47(0.38-0.55)    | 10 | 0.52(0.49,0.55)    | 0.24(0.23,0.25)    | 0.13(0.10,0.15)    | 0.29(0.28,0.31)    | 7  |
| Andean Latin America               | 0.27(0.22-0.32)    | 2  | 0.32(0.26-0.38)    | 16 | 1.05(1.01,1.09)    | 0.65(0.59,0.72)    | 0.28(0.26,0.30)    | 0.66(0.63,0.68)    | 4  |
| Central Latin America              | 0.32(0.26-0.38)    | 4  | 0.40(0.33-0.47)    | 13 | 1.44(1.40,1.49)    | 0.72(0.69,0.75)    | 0.12(0.10,0.15)    | 0.76(0.74,0.78)    | 2  |
| Tropical Latin America             | 0.75(0.63-0.88)    | 14 | 0.79(0.66-0.93)    | 9  | 0.04(-0.04,0.13)   | 0.04(-0.04,0.13)   | 0.04(-0.48,0.57)   | 0.10(-0.09,0.29)   | 11 |
| North Africa and Middle East       | 1.32(1.14-1.49)    | 7  | 1.39(1.20-1.58)    | 5  | -0.16(-0.22,-0.10) | 0.22(0.19,0.25)    | 0.47(0.44,0.50)    | 0.20(0.17,0.22)    | 8  |
| South Asia                         | 0.37(0.30-0.44)    | 3  | 0.40(0.33-0.48)    | 12 | 0.05(-0.02,0.11)   | 0.35(0.32,0.38)    | 0.53(0.50,0.55)    | 0.31(0.28,0.34)    | 6  |
| Central Sub-Saharan Africa         | 0.22(0.17-0.26)    | 5  | 0.22(0.18-0.27)    | 18 | -0.21(-0.25,-0.17) | 0.12(0.11,0.13)    | 0.35(0.34,0.37)    | 0.09(0.08,0.11)    | 13 |
| Eastern Sub-Saharan Africa         | 0.26(0.20-0.31)    | 21 | 0.26(0.20-0.31)    | 17 | -0.46(-0.49,-0.43) | 0.02(-0.05,0.09)   | 0.49(0.44,0.54)    | 0.01(-0.02,0.04)   | 15 |
| Southern Sub-Saharan Africa        | 0.37(0.30-0.45)    | 20 | 0.38(0.31-0.46)    | 14 | -0.46(-0.48,-0.44) | 0.09(0.00,0.18)    | 0.53(0.46,0.60)    | 0.06(0.02,0.09)    | 14 |
| Western Sub-Saharan Africa         | 0.37(0.30-0.43)    | 19 | 0.41(0.34-0.48)    | 11 | 0.31(0.29,0.33)    | 0.41(0.40,0.42)    | 0.51(0.48,0.55)    | 0.41(0.39,0.42)    | 5  |
| <b><i>Rheumatoid arthritis</i></b> |                    |    |                    |    |                    |                    |                    |                    |    |
| East Asia                          | 11.41(10.31-12.65) | 10 | 11.68(10.56-12.89) | 13 | 0.26(0.25,0.27)    | 0.38(0.37,0.39)    | -0.52(-0.60,-0.43) | 0.07(0.05,0.10)    | 19 |
| Southeast Asia                     | 5.05(4.47-5.68)    | 18 | 5.54(4.92-6.24)    | 19 | 0.27(0.19,0.35)    | 0.61(0.57,0.65)    | -0.02(-0.19,0.15)  | 0.31(0.25,0.37)    | 10 |
| Oceania                            | 3.69(3.20-4.26)    | 21 | 3.92(3.40-4.51)    | 21 | 0.37(0.32,0.41)    | -0.09(-0.16,-0.02) | 0.40(0.32,0.48)    | 0.22(0.18,0.26)    | 14 |
| Central Asia                       | 13.57(12.47-14.89) | 9  | 17.33(15.91-18.97) | 5  | 0.18(0.09,0.26)    | 1.14(1.04,1.25)    | 1.23(1.17,1.29)    | 0.88(0.83,0.94)    | 3  |



|                              |                       |    |                       |    |                    |                    |                    |                    |    |
|------------------------------|-----------------------|----|-----------------------|----|--------------------|--------------------|--------------------|--------------------|----|
| Central Europe               | 10.82(9.73-11.99)     | 13 | 11.44(10.20-12.72)    | 14 | 0.45(0.13,0.77)    | 0.45(0.35,0.54)    | -0.57(-0.78,-0.35) | 0.15(0.01,0.29)    | 17 |
| Eastern Europe               | 7.19(6.45-8.00)       | 17 | 7.61(6.83-8.47)       | 17 | 0.13(0.11,0.15)    | 0.32(0.30,0.34)    | 0.13(0.12,0.14)    | 0.20(0.19,0.21)    | 15 |
| High-income Asia Pacific     | 14.50(13.05-15.99)    | 8  | 14.19(12.75-15.65)    | 11 | 0.16(0.11,0.20)    | 0.16(0.11,0.20)    | -0.45(-1.26,0.36)  | -0.03(-0.29,0.22)  | 20 |
| Australasia                  | 19.12(17.25-21.24)    | 2  | 20.89(18.75-23.34)    | 3  | 0.81(0.78,0.84)    | 0.62(0.58,0.65)    | -0.56(-0.82,-0.30) | 0.31(0.22,0.40)    | 11 |
| Western Europe               | 14.94(13.64-16.35)    | 7  | 15.76(14.35-17.32)    | 8  | 0.42(0.40,0.44)    | 0.42(0.40,0.44)    | -0.32(-0.68,0.05)  | 0.19(0.08,0.31)    | 16 |
| Southern Latin America       | 10.93(9.78-12.24)     | 12 | 14.51(13.16-16.09)    | 10 | 1.50(1.48,1.53)    | 1.00(0.98,1.02)    | 0.37(0.23,0.52)    | 0.97(0.93,1.02)    | 2  |
| High-income North America    | 18.12(16.98-19.40)    | 3  | 21.46(20.02-23.09)    | 1  | 0.59(0.54,0.63)    | 0.94(0.89,0.98)    | 0.18(0.15,0.21)    | 0.59(0.57,0.62)    | 7  |
| Caribbean                    | 8.84(7.78-10.03)      | 16 | 10.77(9.55-12.17)     | 15 | 0.85(0.83,0.86)    | 0.79(0.74,0.85)    | 0.41(0.40,0.42)    | 0.69(0.67,0.70)    | 5  |
| Andean Latin America         | 10.01(8.93-11.31)     | 14 | 14.74(13.16-16.62)    | 9  | 1.67(1.58,1.76)    | 1.28(1.18,1.39)    | 1.06(1.04,1.09)    | 1.36(1.31,1.40)    | 1  |
| Central Latin America        | 20.35(18.54-22.23)    | 1  | 21.12(19.29-23.07)    | 2  | 0.20(0.15,0.25)    | -0.07(-0.18,0.04)  | 0.16(-0.07,0.39)   | 0.09(0.00,0.17)    | 18 |
| Tropical Latin America       | 11.25(10.07-12.59)    | 11 | 12.00(10.74-13.41)    | 12 | 0.11(0.03,0.19)    | 0.15(0.11,0.19)    | 0.46(0.41,0.51)    | 0.24(0.20,0.28)    | 13 |
| North Africa and Middle East | 4.68(4.15-5.30)       | 19 | 5.86(5.18-6.63)       | 18 | 0.55(0.51,0.60)    | 0.92(0.89,0.94)    | 0.87(0.82,0.92)    | 0.79(0.76,0.82)    | 4  |
| South Asia                   | 16.66(15.08-18.36)    | 5  | 18.09(16.35-19.94)    | 4  | 0.25(0.25,0.26)    | 0.25(0.25,0.26)    | 0.32(0.26,0.38)    | 0.28(0.26,0.30)    | 12 |
| Central Sub-Saharan Africa   | 9.18(8.12-10.32)      | 15 | 10.57(9.39-11.92)     | 16 | 0.02(-0.06,0.10)   | 0.75(0.72,0.78)    | 0.64(0.34,0.94)    | 0.49(0.39,0.59)    | 8  |
| Eastern Sub-Saharan Africa   | 15.05(13.60-16.61)    | 6  | 17.02(15.40-18.77)    | 7  | 0.16(0.07,0.25)    | 0.71(0.67,0.76)    | 0.38(0.32,0.43)    | 0.43(0.39,0.47)    | 9  |
| Southern Sub-Saharan Africa  | 17.51(15.69-19.48)    | 4  | 17.16(15.35-19.11)    | 6  | -0.21(-0.29,-0.14) | 0.23(0.17,0.29)    | -0.27(-0.41,-0.13) | -0.08(-0.13,-0.02) | 21 |
| Western Sub-Saharan Africa   | 3.90(3.45-4.40)       | 20 | 4.63(4.09-5.23)       | 20 | 0.46(0.34,0.59)    | 0.53(0.40,0.65)    | 0.92(0.75,1.10)    | 0.62(0.53,0.71)    | 6  |
| <i>Psoriasis</i>             |                       |    |                       |    |                    |                    |                    |                    |    |
| East Asia                    | 68.35(65.91-70.81)    | 10 | 54.11(52.23-55.94)    | 12 | -0.79(-0.81,-0.76) | -0.77(-0.83,-0.71) | -0.81(-0.84,-0.78) | -0.80(-0.82,-0.77) | 19 |
| Southeast Asia               | 23.05(22.17-23.88)    | 21 | 20.07(19.29-20.78)    | 21 | -0.56(-0.59,-0.52) | -0.42(-0.43,-0.41) | -0.46(-0.56,-0.36) | -0.48(-0.51,-0.44) | 14 |
| Oceania                      | 43.09(41.40-44.85)    | 15 | 39.17(37.63-40.77)    | 16 | -0.38(-0.40,-0.35) | -0.21(-0.22,-0.20) | -0.42(-0.47,-0.37) | -0.33(-0.34,-0.31) | 8  |
| Central Asia                 | 74.11(71.17-77.12)    | 7  | 62.24(59.72-64.69)    | 7  | -0.47(-0.51,-0.43) | -0.78(-0.82,-0.75) | -0.48(-0.50,-0.45) | -0.59(-0.61,-0.57) | 17 |
| Central Europe               | 71.31(68.82-73.84)    | 9  | 60.27(58.48-62.17)    | 8  | -0.61(-0.65,-0.57) | -0.71(-0.79,-0.64) | -0.32(-0.36,-0.29) | -0.56(-0.59,-0.53) | 16 |
| Eastern Europe               | 67.11(64.77-69.57)    | 11 | 59.54(57.57-61.52)    | 9  | -0.53(-0.55,-0.51) | -0.39(-0.44,-0.34) | -0.23(-0.25,-0.21) | -0.41(-0.43,-0.39) | 10 |
| High-income Asia Pacific     | 41.36(39.94-42.86)    | 16 | 39.97(38.55-41.42)    | 15 | -0.21(-0.22,-0.20) | -0.09(-0.10,-0.09) | -0.07(-0.08,-0.05) | -0.11(-0.12,-0.11) | 1  |
| Australasia                  | 157.82(151.86-163.78) | 2  | 145.38(139.62-151.43) | 2  | -0.03(-0.07,0.01)  | -0.20(-0.22,-0.18) | -0.63(-0.76,-0.49) | -0.28(-0.33,-0.23) | 6  |
| Western Europe               | 216.88(209.34-224.16) | 1  | 204.51(197.64-211.36) | 1  | -0.18(-0.18,-0.18) | -0.18(-0.18,-0.18) | -0.25(-0.28,-0.22) | -0.20(-0.21,-0.19) | 3  |
| Southern Latin America       | 110.10(105.50-114.69) | 3  | 102.07(97.89-106.31)  | 3  | -0.34(-0.37,-0.31) | -0.17(-0.19,-0.16) | -0.28(-0.30,-0.26) | -0.27(-0.28,-0.25) | 5  |
| High-income North America    | 105.04(101.70-108.14) | 4  | 92.70(89.72-95.53)    | 4  | -0.06(-0.10,-0.01) | -1.00(-1.09,-0.91) | -0.18(-0.22,-0.13) | -0.45(-0.49,-0.41) | 12 |
| Caribbean                    | 61.27(58.86-63.74)    | 13 | 56.92(54.72-59.25)    | 10 | -0.16(-0.19,-0.13) | -0.38(-0.39,-0.36) | -0.23(-0.23,-0.22) | -0.25(-0.26,-0.24) | 4  |
| Andean Latin America         | 94.80(90.91-98.80)    | 5  | 82.37(78.80-85.77)    | 6  | -0.44(-0.50,-0.38) | -0.42(-0.44,-0.40) | -0.62(-0.65,-0.58) | -0.49(-0.52,-0.46) | 15 |
| Central Latin America        | 23.59(22.71-24.45)    | 20 | 20.71(19.93-21.49)    | 20 | -0.59(-0.65,-0.52) | -0.34(-0.42,-0.25) | -0.39(-0.41,-0.38) | -0.45(-0.48,-0.41) | 13 |
| Tropical Latin America       | 92.37(89.15-95.39)    | 6  | 87.14(84.12-90.05)    | 5  | -0.24(-0.26,-0.23) | -0.14(-0.16,-0.13) | -0.20(-0.22,-0.19) | -0.19(-0.20,-0.18) | 2  |
| North Africa and Middle East | 72.15(69.36-74.86)    | 8  | 55.50(53.46-57.52)    | 11 | -0.88(-0.89,-0.87) | -0.99(-1.01,-0.97) | -0.82(-0.83,-0.82) | -0.90(-0.91,-0.89) | 21 |
| South Asia                   | 48.38(46.75-50.10)    | 14 | 44.41(42.86-45.97)    | 14 | -0.03(-0.04,-0.02) | -0.35(-0.36,-0.34) | -0.54(-0.56,-0.51) | -0.30(-0.31,-0.29) | 7  |
| Central Sub-Saharan Africa   | 61.81(59.24-64.51)    | 12 | 51.61(49.40-53.80)    | 13 | -0.27(-0.34,-0.21) | -0.39(-0.49,-0.30) | -1.26(-1.32,-1.21) | -0.64(-0.68,-0.59) | 18 |
| Eastern Sub-Saharan Africa   | 27.85(26.79-28.93)    | 19 | 25.13(24.21-26.09)    | 19 | -0.33(-0.38,-0.27) | -0.23(-0.28,-0.18) | -0.49(-0.51,-0.48) | -0.36(-0.39,-0.34) | 9  |
| Southern Sub-Saharan Africa  | 36.78(35.50-38.17)    | 18 | 32.87(31.69-34.06)    | 17 | -0.56(-0.71,-0.41) | -0.20(-0.38,-0.03) | -0.44(-0.47,-0.40) | -0.41(-0.49,-0.34) | 11 |

|                                 |                                |    |                                |    |                    |                    |                    |                    |    |
|---------------------------------|--------------------------------|----|--------------------------------|----|--------------------|--------------------|--------------------|--------------------|----|
| Western Sub-Saharan Africa      | 40.67(39.20-42.12)             | 17 | 32.46(31.29-33.64)             | 18 | -0.72(-0.79,-0.66) | -0.76(-0.98,-0.55) | -0.89(-1.10,-0.67) | -0.80(-0.90,-0.70) | 20 |
| <b><i>Atopic dermatitis</i></b> |                                |    |                                |    |                    |                    |                    |                    |    |
| East Asia                       | 412.26(395.49-427.83)          | 6  | 413.82(396.40-429.81)          | 6  | -0.09(-0.11,-0.07) | 0.05(0.04,0.06)    | 0.07(0.04,0.11)    | 0.01(0.00,0.03)    | 4  |
| Southeast Asia                  | 532.36(505.38-558.15)          | 3  | 530.26(503.33-555.12)          | 3  | -0.02(-0.02,-0.02) | 0.00(-0.01,0.00)   | -0.02(-0.02,-0.02) | -0.01(-0.01,-0.01) | 13 |
| Oceania                         | 484.15(450.84-516.78)          | 4  | 484.95(451.62-517.53)          | 4  | 0.02(0.02,0.03)    | -0.01(-0.01,-0.01) | 0.00(0.00,0.00)    | 0.01(0.00,0.01)    | 5  |
| Central Asia                    | 614.63(543.66-695.31)          | 1  | 610.57(539.97-691.42)          | 1  | -0.02(-0.03,-0.02) | -0.03(-0.03,-0.03) | -0.02(-0.02,-0.01) | -0.02(-0.02,-0.02) | 17 |
| Central Europe                  | 198.01(185.19-211.75)          | 17 | 193.63(182.21-206.07)          | 17 | 0.06(0.05,0.08)    | -0.26(-0.28,-0.25) | 0.01(0.00,0.02)    | -0.07(-0.08,-0.07) | 19 |
| Eastern Europe                  | 260.89(243.49-279.32)          | 13 | 266.04(248.59-283.86)          | 13 | 0.12(0.05,0.20)    | -0.01(-0.11,0.09)  | 0.05(0.00,0.09)    | 0.07(0.02,0.11)    | 1  |
| High-income Asia Pacific        | 547.85(513.24-583.03)          | 2  | 545.03(509.47-579.47)          | 2  | -0.02(-0.04,0.00)  | 0.08(0.06,0.11)    | -0.16(-0.22,-0.11) | -0.03(-0.05,-0.01) | 18 |
| Australasia                     | 361.75(334.45-391.81)          | 8  | 360.50(333.61-388.98)          | 8  | 0.04(0.03,0.05)    | 0.01(0.01,0.02)    | -0.09(-0.10,-0.08) | -0.01(-0.02,-0.01) | 14 |
| Western Europe                  | 477.21(446.25-510.45)          | 5  | 476.69(445.44-510.57)          | 5  | -0.04(-0.08,0.01)  | -0.04(-0.05,-0.04) | 0.07(0.02,0.12)    | 0.00(-0.03,0.02)   | 7  |
| Southern Latin America          | 402.46(371.52-436.12)          | 7  | 401.80(370.92-435.35)          | 7  | -0.01(-0.01,-0.01) | 0.00(0.00,0.00)    | -0.01(-0.01,0.00)  | -0.01(-0.01,-0.01) | 15 |
| High-income North America       | 312.93(296.63-329.93)          | 10 | 295.03(279.20-311.24)          | 10 | 0.88(0.72,1.04)    | -1.61(-1.69,-1.53) | 0.04(-0.04,0.12)   | -0.21(-0.28,-0.14) | 21 |
| Caribbean                       | 274.15(251.70-296.05)          | 12 | 273.97(251.52-295.86)          | 12 | 0.00(0.00,0.00)    | 0.00(0.00,0.00)    | 0.00(0.00,0.00)    | 0.00(0.00,0.00)    | 8  |
| Andean Latin America            | 258.61(242.89-274.25)          | 14 | 259.37(244.62-274.99)          | 14 | -0.13(-0.17,-0.09) | 0.02(0.01,0.02)    | 0.19(0.15,0.22)    | 0.02(0.01,0.04)    | 3  |
| Central Latin America           | 217.24(204.23-231.73)          | 15 | 217.08(203.95-231.55)          | 15 | -0.03(-0.03,-0.02) | 0.00(0.00,0.00)    | 0.02(0.02,0.02)    | 0.00(0.00,0.00)    | 9  |
| Tropical Latin America          | 320.61(303.39-339.02)          | 9  | 320.05(303.52-337.54)          | 9  | -0.04(-0.06,-0.03) | 0.00(0.00,0.01)    | 0.02(0.02,0.03)    | -0.01(-0.01,0.00)  | 16 |
| North Africa and Middle East    | 202.35(189.14-216.48)          | 16 | 195.14(182.57-208.75)          | 16 | -0.07(-0.07,-0.06) | -0.19(-0.19,-0.18) | -0.12(-0.12,-0.11) | -0.13(-0.13,-0.12) | 20 |
| South Asia                      | 277.40(260.24-296.27)          | 11 | 277.76(260.54-296.42)          | 11 | 0.12(0.11,0.12)    | 0.00(0.00,0.00)    | -0.11(-0.12,-0.10) | 0.00(0.00,0.01)    | 10 |
| Central Sub-Saharan Africa      | 159.48(146.77-173.94)          | 20 | 159.46(146.75-173.97)          | 20 | 0.00(0.00,0.00)    | 0.00(0.00,0.00)    | 0.00(0.00,0.00)    | 0.00(0.00,0.00)    | 11 |
| Eastern Sub-Saharan Africa      | 155.13(146.67-164.49)          | 21 | 157.63(149.10-167.07)          | 21 | 0.04(0.02,0.06)    | 0.06(0.05,0.07)    | 0.08(0.06,0.10)    | 0.06(0.05,0.07)    | 2  |
| Southern Sub-Saharan Africa     | 160.66(151.27-171.63)          | 19 | 160.50(151.12-171.49)          | 19 | 0.00(0.00,0.00)    | -0.01(-0.01,-0.01) | -0.01(-0.01,-0.01) | 0.00(0.00,0.00)    | 12 |
| Western Sub-Saharan Africa      | 161.57(153.29-170.37)          | 18 | 162.15(153.96-170.97)          | 18 | -0.04(-0.04,-0.03) | 0.02(0.02,0.03)    | 0.05(0.04,0.06)    | 0.01(0.01,0.02)    | 6  |
| <b>Number of incident cases</b> |                                |    |                                |    |                    |                    |                    |                    |    |
| <b><i>Asthma</i></b>            |                                |    |                                |    |                    |                    |                    |                    |    |
| East Asia                       | 4,718,775(3,544,699-6,361,232) | 1  | 3,979,880(3,082,882-5,179,775) | 3  | -1.66(-3.02,-0.27) | -2.79(-3.60,-1.98) | 4.13(2.73,5.55)    | -0.28(-1.05,0.48)  | 16 |
| Southeast Asia                  | 2,894,847(2,306,202-3,676,835) | 4  | 3,450,998(2,810,277-4,271,027) | 5  | 0.40(0.34,0.47)    | 0.80(0.67,0.93)    | 0.61(0.47,0.74)    | 0.58(0.52,0.65)    | 11 |
| Oceania                         | 53,282(43,278-65,083)          | 21 | 91,492(76,089-110,025)         | 21 | 2.50(2.42,2.57)    | 1.24(1.16,1.32)    | 2.01(1.89,2.13)    | 1.90(1.84,1.95)    | 4  |
| Central Asia                    | 299,599(232,086-389,478)       | 19 | 353,674(272,735-459,839)       | 19 | -0.04(-0.16,0.07)  | -0.31(-0.42,-0.20) | 2.25(2.08,2.41)    | 0.59(0.50,0.67)    | 10 |
| Central Europe                  | 860,511(723,121-1,034,183)     | 13 | 586,970(486,653-704,768)       | 14 | -1.20(-1.32,-1.08) | -1.90(-1.95,-1.84) | -0.79(-0.94,-0.65) | -1.33(-1.40,-1.27) | 19 |
| Eastern Europe                  | 1,433,382(1,159,698-1,770,626) | 10 | 755,273(586,070-966,281)       | 13 | -2.67(-2.90,-2.44) | -3.76(-3.90,-3.62) | 0.13(-0.21,0.48)   | -2.18(-2.33,-2.02) | 21 |
| High-income Asia Pacific        | 1,371,250(1,152,445-1,646,704) | 11 | 795,949(663,981-951,354)       | 12 | -2.01(-2.20,-1.82) | -3.53(-3.73,-3.32) | 0.07(-0.09,0.22)   | -1.96(-2.07,-1.84) | 20 |
| Australasia                     | 137,909(110,796-166,316)       | 20 | 139,912(111,577-175,051)       | 20 | 0.88(0.54,1.21)    | -1.83(-2.05,-1.61) | 0.97(0.82,1.12)    | 0.02(-0.13,0.17)   | 14 |
| Western Europe                  | 2,251,292(1,922,884-2,628,385) | 6  | 1,785,531(1,472,143-2,130,570) | 8  | -1.90(-2.61,-1.19) | -0.49(-0.57,-0.41) | -0.10(-0.64,0.44)  | -0.81(-1.09,-0.53) | 18 |
| Southern Latin America          | 368,390(307,660-451,220)       | 17 | 453,729(370,284-559,750)       | 16 | 0.95(0.81,1.10)    | 0.54(0.46,0.63)    | 0.77(0.70,0.84)    | 0.74(0.68,0.79)    | 9  |
| High-income North America       | 3,368,771(2,678,501-4,315,052) | 3  | 4,366,448(3,653,279-5,207,636) | 2  | -2.06(-2.47,-1.64) | 3.17(2.83,3.51)    | 1.35(1.08,1.62)    | 0.97(0.75,1.20)    | 8  |
| Caribbean                       | 396,154(314,621-493,778)       | 16 | 403,255(321,534-502,347)       | 17 | 0.02(-0.01,0.06)   | -0.16(-0.20,-0.13) | 0.30(0.02,0.58)    | 0.04(-0.05,0.13)   | 13 |
| Andean Latin America            | 472,850(350,865-612,633)       | 14 | 484,221(360,725-652,231)       | 15 | -0.14(-0.24,-0.04) | -1.20(-1.29,-1.10) | 1.83(1.74,1.93)    | 0.07(0.01,0.13)    | 12 |

|                                          |                                |    |                                |    |                    |                    |                    |                    |    |
|------------------------------------------|--------------------------------|----|--------------------------------|----|--------------------|--------------------|--------------------|--------------------|----|
| Central Latin America                    | 1,435,630(1,089,179-1,851,815) | 9  | 1,372,619(1,015,874-1,823,855) | 10 | -0.32(-0.58,-0.06) | -0.47(-0.57,-0.37) | 0.41(0.38,0.45)    | -0.16(-0.25,-0.07) | 15 |
| Tropical Latin America                   | 1,841,692(1,338,521-2,484,003) | 8  | 1,686,457(1,214,675-2,210,165) | 9  | -0.38(-0.61,-0.14) | -1.20(-1.26,-1.15) | 0.78(0.51,1.04)    | -0.34(-0.45,-0.22) | 17 |
| North Africa and Middle East             | 2,397,788(1,873,586-3,050,027) | 5  | 3,488,139(2,767,724-4,354,302) | 4  | 1.29(1.21,1.38)    | 0.86(0.82,0.90)    | 1.85(1.67,2.04)    | 1.30(1.24,1.37)    | 5  |
| South Asia                               | 3,901,616(3,185,149-4,919,914) | 2  | 5,437,961(4,525,432-6,587,224) | 1  | -2.17(-3.19,-1.14) | 4.56(3.01,6.14)    | 0.88(0.23,1.53)    | 1.05(0.43,1.68)    | 7  |
| Central Sub-Saharan Africa               | 415,201(318,263-530,212)       | 15 | 818,097(629,087-1,053,677)     | 11 | 2.37(2.34,2.39)    | 2.36(2.33,2.39)    | 2.41(2.37,2.45)    | 2.37(2.35,2.39)    | 2  |
| Eastern Sub-Saharan Africa               | 1,866,566(1,437,024-2,426,543) | 7  | 3,319,135(2,507,204-4,344,481) | 6  | 1.81(1.64,1.98)    | 1.97(1.91,2.02)    | 2.30(2.14,2.46)    | 2.02(1.93,2.10)    | 3  |
| Southern Sub-Saharan Africa              | 323,886(237,510-424,938)       | 18 | 385,370(289,150-504,564)       | 18 | 2.17(1.45,2.89)    | -5.03(-7.09,-2.92) | 6.61(5.67,7.57)    | 1.06(0.24,1.88)    | 6  |
| Western Sub-Saharan Africa               | 1,353,823(1,025,497-1,781,921) | 12 | 2,824,158(2,102,924-3,781,716) | 7  | 2.23(1.98,2.48)    | 2.97(2.67,3.27)    | 2.48(2.42,2.55)    | 2.51(2.38,2.64)    | 1  |
| <b><i>Inflammatory bowel disease</i></b> |                                |    |                                |    |                    |                    |                    |                    |    |
| East Asia                                | 17,567(14,627-20,802)          | 7  | 52,319(44,680-61,455)          | 3  | 5.59(5.22,5.97)    | 3.24(3.13,3.35)    | 2.74(2.61,2.87)    | 3.81(3.68,3.94)    | 2  |
| Southeast Asia                           | 1,882(1,527-2,270)             | 13 | 4,980(4,182-5,972)             | 13 | 5.26(5.04,5.48)    | 2.65(2.47,2.83)    | 2.49(2.46,2.52)    | 3.42(3.31,3.53)    | 7  |
| Oceania                                  | 22(18-27)                      | 21 | 63(52-77)                      | 21 | 3.10(3.07,3.13)    | 3.79(3.73,3.85)    | 3.89(3.81,3.98)    | 3.61(3.57,3.65)    | 4  |
| Central Asia                             | 3,514(2,995-4,146)             | 11 | 6,461(5,487-7,637)             | 11 | 1.58(1.43,1.73)    | 2.19(2.11,2.27)    | 2.51(2.00,3.03)    | 2.10(1.93,2.27)    | 13 |
| Central Europe                           | 20,997(18,082-24,170)          | 3  | 14,809(13,443-16,391)          | 8  | -2.39(-2.66,-2.13) | -0.71(-1.09,-0.34) | -0.06(-0.10,-0.02) | -1.25(-1.40,-1.09) | 21 |
| Eastern Europe                           | 18,150(15,600-21,209)          | 5  | 19,500(16,838-22,671)          | 7  | 0.97(0.89,1.05)    | 0.00(-0.14,0.14)   | -0.12(-0.30,0.05)  | 0.28(0.20,0.36)    | 19 |
| High-income Asia Pacific                 | 18,105(15,391-21,422)          | 6  | 27,084(23,870-30,621)          | 5  | 4.04(3.25,4.84)    | 0.33(0.24,0.42)    | 0.03(-0.29,0.36)   | 1.37(1.11,1.64)    | 17 |
| Australasia                              | 2,979(2,556-3,481)             | 12 | 6,446(5,755-7,212)             | 12 | 4.69(4.39,4.99)    | 1.83(1.82,1.84)    | 1.83(1.82,1.84)    | 2.71(2.62,2.80)    | 9  |
| Western Europe                           | 59,081(53,733-65,529)          | 2  | 78,645(71,611-86,709)          | 2  | 1.36(1.20,1.51)    | 1.07(1.01,1.12)    | 0.59(0.47,0.72)    | 1.00(0.93,1.07)    | 18 |
| Southern Latin America                   | 879(742-1,030)                 | 16 | 1,382(1,177-1,620)             | 16 | 2.35(2.27,2.44)    | 1.61(1.58,1.64)    | 0.76(0.63,0.89)    | 1.57(1.52,1.62)    | 16 |
| High-income North America                | 107,616(94,147-123,884)        | 1  | 99,611(91,945-109,000)         | 1  | -3.74(-4.10,-3.38) | 1.77(1.68,1.85)    | 0.89(0.82,0.96)    | -0.27(-0.39,-0.15) | 20 |
| Caribbean                                | 677(580-796)                   | 17 | 1,312(1,121-1,571)             | 17 | 3.35(3.23,3.48)    | 0.82(0.77,0.88)    | 2.83(2.76,2.90)    | 2.33(2.28,2.38)    | 12 |
| Andean Latin America                     | 472(402-550)                   | 19 | 1,128(975-1,314)               | 19 | 4.46(4.25,4.67)    | 0.55(0.45,0.65)    | 4.25(4.15,4.36)    | 3.06(2.98,3.15)    | 8  |
| Central Latin America                    | 3,968(3,402-4,618)             | 10 | 6,754(5,834-7,826)             | 10 | 1.80(1.52,2.09)    | 0.92(0.75,1.09)    | 2.82(2.69,2.94)    | 1.89(1.78,2.01)    | 14 |
| Tropical Latin America                   | 7,826(6,859-8,976)             | 9  | 12,928(11,334-14,874)          | 9  | 2.00(1.86,2.14)    | 1.78(1.21,2.36)    | 1.43(1.28,1.59)    | 1.74(1.55,1.93)    | 15 |
| North Africa and Middle East             | 8,107(7,040-9,204)             | 8  | 22,722(19,277-26,952)          | 6  | 4.62(4.52,4.72)    | 2.63(2.54,2.72)    | 3.59(3.56,3.62)    | 3.64(3.59,3.68)    | 3  |
| South Asia                               | 18,439(15,169-22,582)          | 4  | 39,705(32,943-48,454)          | 4  | 3.08(2.92,3.25)    | 3.35(3.31,3.39)    | 1.44(0.99,1.88)    | 2.67(2.52,2.82)    | 10 |
| Central Sub-Saharan Africa               | 381(318-469)                   | 20 | 1,150(955-1,400)               | 18 | 3.67(3.63,3.71)    | 3.52(3.40,3.64)    | 4.60(4.38,4.82)    | 3.90(3.82,3.99)    | 1  |
| Eastern Sub-Saharan Africa               | 1,092(908-1,315)               | 15 | 2,938(2,449-3,538)             | 15 | 2.85(2.71,2.98)    | 3.57(3.40,3.75)    | 3.90(3.84,3.97)    | 3.44(3.37,3.51)    | 6  |
| Southern Sub-Saharan Africa              | 504(423-608)                   | 18 | 989(837-1,188)                 | 20 | 3.04(2.96,3.11)    | 1.40(1.21,1.58)    | 2.66(2.57,2.75)    | 2.38(2.30,2.45)    | 11 |
| Western Sub-Saharan Africa               | 1,314(1,102-1,599)             | 14 | 3,628(3,028-4,401)             | 14 | 3.27(3.20,3.34)    | 2.87(2.85,2.90)    | 4.68(4.56,4.80)    | 3.55(3.51,3.60)    | 5  |
| <b><i>Multiple sclerosis</i></b>         |                                |    |                                |    |                    |                    |                    |                    |    |
| East Asia                                | 2,100(1,696-2,542)             | 7  | 3,120(2,555-3,722)             | 5  | 1.40(1.36,1.44)    | 1.21(1.17,1.25)    | 1.48(1.30,1.67)    | 1.36(1.30,1.42)    | 15 |
| Southeast Asia                           | 725(571-891)                   | 10 | 1,251(1,010-1,504)             | 11 | 2.25(2.23,2.27)    | 1.88(1.86,1.90)    | 1.60(1.57,1.62)    | 1.90(1.89,1.91)    | 12 |
| Oceania                                  | 7(6-9)                         | 21 | 16(12-19)                      | 21 | 2.50(2.45,2.54)    | 2.76(2.71,2.80)    | 2.57(2.54,2.60)    | 2.62(2.59,2.64)    | 7  |
| Central Asia                             | 887(779-999)                   | 9  | 1,352(1,176-1,537)             | 10 | 1.22(1.15,1.30)    | 2.23(2.13,2.33)    | 0.79(0.73,0.85)    | 1.46(1.41,1.51)    | 14 |
| Central Europe                           | 2,247(1,986-2,482)             | 6  | 1,841(1,648-2,036)             | 8  | 0.08(-0.04,0.21)   | -0.48(-0.55,-0.41) | -1.77(-1.85,-1.70) | -0.71(-0.77,-0.65) | 20 |
| Eastern Europe                           | 2,920(2,484-3,330)             | 5  | 2,152(1,832-2,468)             | 6  | -0.72(-0.83,-0.61) | -0.42(-0.54,-0.31) | -2.16(-2.30,-2.03) | -1.07(-1.18,-0.97) | 21 |
| High-income Asia Pacific                 | 655(528-787)                   | 11 | 727(597-872)                   | 14 | 0.70(0.62,0.78)    | 0.06(0.04,0.08)    | 0.33(0.27,0.39)    | 0.37(0.34,0.41)    | 19 |

|                                    |                          |    |                          |    |                    |                   |                    |                 |    |
|------------------------------------|--------------------------|----|--------------------------|----|--------------------|-------------------|--------------------|-----------------|----|
| Australasia                        | 336(301-374)             | 16 | 593(520-664)             | 16 | 3.99(3.41,4.57)    | 1.40(1.30,1.50)   | 0.66(0.30,1.01)    | 1.96(1.75,2.18) | 10 |
| Western Europe                     | 10,254(9,116-11,454)     | 2  | 12,497(11,106-13,903)    | 1  | 1.06(1.00,1.12)    | 0.69(0.67,0.71)   | 0.30(0.21,0.39)    | 0.68(0.64,0.71) | 17 |
| Southern Latin America             | 445(370-519)             | 14 | 657(550-760)             | 15 | 1.45(1.44,1.47)    | 1.42(1.41,1.42)   | 1.16(1.12,1.21)    | 1.35(1.33,1.36) | 16 |
| High-income North America          | 10,608(9,353-11,936)     | 1  | 12,058(11,089-12,990)    | 2  | -0.19(-0.27,-0.10) | 0.70(0.64,0.77)   | 0.76(0.73,0.80)    | 0.45(0.41,0.49) | 18 |
| Caribbean                          | 148(119-176)             | 18 | 230(189-271)             | 19 | 2.34(2.22,2.45)    | 1.33(1.29,1.37)   | 1.00(0.99,1.02)    | 1.54(1.50,1.58) | 13 |
| Andean Latin America               | 86(68-104)               | 20 | 206(165-244)             | 20 | 3.77(3.68,3.87)    | 2.96(2.91,3.01)   | 2.59(2.57,2.61)    | 3.09(3.06,3.13) | 3  |
| Central Latin America              | 454(361-548)             | 13 | 1,042(856-1,222)         | 12 | 4.28(4.20,4.37)    | 2.80(2.75,2.85)   | 1.62(1.56,1.68)    | 2.89(2.85,2.94) | 5  |
| Tropical Latin America             | 1,041(858-1,223)         | 8  | 1,968(1,637-2,320)       | 7  | 2.73(2.36,3.10)    | 2.32(2.23,2.40)   | 1.47(0.95,1.99)    | 2.18(1.98,2.38) | 9  |
| North Africa and Middle East       | 4,189(3,598-4,785)       | 3  | 9,218(7,879-10,525)      | 3  | 2.90(2.79,3.01)    | 3.03(2.99,3.07)   | 2.28(2.21,2.34)    | 2.78(2.73,2.82) | 6  |
| South Asia                         | 3,560(2,839-4,324)       | 4  | 7,447(5,987-8,965)       | 4  | 2.46(2.42,2.50)    | 2.70(2.69,2.71)   | 2.58(2.48,2.68)    | 2.59(2.55,2.62) | 8  |
| Central Sub-Saharan Africa         | 93(73-116)               | 19 | 243(188-302)             | 18 | 2.93(2.89,2.96)    | 3.44(3.41,3.47)   | 3.74(3.70,3.79)    | 3.37(3.35,3.40) | 2  |
| Eastern Sub-Saharan Africa         | 370(289-459)             | 15 | 876(681-1,087)           | 13 | 2.49(2.39,2.58)    | 2.96(2.94,2.99)   | 3.61(3.55,3.67)    | 3.02(2.98,3.06) | 4  |
| Southern Sub-Saharan Africa        | 174(138-213)             | 17 | 302(240-365)             | 17 | 2.04(1.99,2.09)    | 1.67(1.63,1.70)   | 2.06(1.95,2.16)    | 1.91(1.87,1.95) | 11 |
| Western Sub-Saharan Africa         | 554(446-669)             | 12 | 1,549(1,264-1,846)       | 9  | 3.59(3.56,3.62)    | 3.64(3.63,3.65)   | 3.61(3.57,3.65)    | 3.61(3.59,3.63) | 1  |
| <b><i>Rheumatoid arthritis</i></b> |                          |    |                          |    |                    |                   |                    |                 |    |
| East Asia                          | 129,319(116,794-143,092) | 1  | 229,076(204,356-254,751) | 2  | 2.46(2.45,2.47)    | 2.46(2.45,2.47)   | 0.94(0.74,1.15)    | 1.99(1.92,2.05) | 16 |
| Southeast Asia                     | 20,115(17,807-22,784)    | 7  | 40,269(35,541-45,594)    | 7  | 2.66(2.58,2.75)    | 2.76(2.72,2.79)   | 1.77(1.66,1.87)    | 2.40(2.35,2.45) | 11 |
| Oceania                            | 218(186-259)             | 21 | 499(428-583)             | 21 | 3.09(3.04,3.15)    | 2.67(2.66,2.69)   | 2.89(2.85,2.92)    | 2.89(2.87,2.92) | 7  |
| Central Asia                       | 7,950(7,203-8,839)       | 13 | 16,172(14,695-17,910)    | 13 | 1.55(1.49,1.60)    | 2.80(2.76,2.85)   | 3.07(3.03,3.11)    | 2.50(2.47,2.53) | 9  |
| Central Europe                     | 14,738(13,204-16,366)    | 11 | 16,228(14,513-18,044)    | 12 | 0.90(0.57,1.23)    | 0.78(0.64,0.92)   | -0.93(-1.21,-0.65) | 0.28(0.13,0.44) | 20 |
| Eastern Europe                     | 17,426(15,654-19,402)    | 8  | 17,769(15,896-19,888)    | 11 | 0.44(0.41,0.47)    | -0.01(-0.02,0.01) | -0.27(-0.28,-0.25) | 0.07(0.06,0.08) | 21 |
| High-income Asia Pacific           | 29,396(26,395-32,483)    | 5  | 37,155(33,402-41,233)    | 8  | 1.46(1.31,1.61)    | 1.23(1.10,1.36)   | -0.52(-0.83,-0.22) | 0.76(0.63,0.89) | 19 |
| Australasia                        | 4,247(3,843-4,703)       | 17 | 7,968(7,149-8,851)       | 19 | 2.51(2.32,2.70)    | 2.87(2.76,2.97)   | 1.01(0.75,1.26)    | 2.15(2.03,2.28) | 12 |
| Western Europe                     | 69,385(63,395-75,650)    | 3  | 92,644(84,751-101,325)   | 4  | 1.16(1.02,1.31)    | 1.40(1.31,1.49)   | 0.29(0.12,0.47)    | 0.98(0.89,1.07) | 18 |
| Southern Latin America             | 5,214(4,663-5,861)       | 15 | 10,667(9,724-11,791)     | 16 | 2.98(2.96,3.00)    | 2.60(2.58,2.62)   | 1.84(1.71,1.97)    | 2.49(2.44,2.53) | 10 |
| High-income North America          | 56,815(53,011-61,123)    | 4  | 104,527(96,439-113,263)  | 3  | 2.06(2.01,2.11)    | 2.57(2.54,2.59)   | 1.73(1.67,1.80)    | 2.14(2.10,2.17) | 13 |
| Caribbean                          | 2,922(2,560-3,361)       | 20 | 5,323(4,720-6,014)       | 20 | 2.62(2.60,2.65)    | 2.21(2.17,2.26)   | 1.43(1.42,1.45)    | 2.09(2.07,2.10) | 14 |
| Andean Latin America               | 3,038(2,651-3,510)       | 19 | 9,218(8,173-10,464)      | 18 | 4.40(4.25,4.54)    | 3.83(3.78,3.88)   | 3.45(3.25,3.66)    | 3.91(3.82,4.00) | 1  |
| Central Latin America              | 24,316(22,123-26,694)    | 6  | 53,797(49,153-58,879)    | 5  | 3.39(3.21,3.57)    | 2.68(2.60,2.76)   | 2.18(2.00,2.36)    | 2.75(2.66,2.85) | 8  |
| Tropical Latin America             | 16,894(15,152-18,948)    | 9  | 28,860(25,680-32,360)    | 10 | 2.42(2.37,2.47)    | 1.76(1.65,1.87)   | 1.49(1.46,1.52)    | 1.89(1.85,1.93) | 17 |
| North Africa and Middle East       | 13,509(11,860-15,455)    | 12 | 36,548(32,078-41,603)    | 9  | 3.51(3.46,3.55)    | 3.76(3.69,3.82)   | 3.23(3.21,3.26)    | 3.50(3.48,3.53) | 4  |
| South Asia                         | 121,147(109,682-133,792) | 2  | 290,966(262,698-320,812) | 1  | 2.89(2.88,2.91)    | 3.12(3.08,3.15)   | 3.17(3.12,3.21)    | 3.07(3.05,3.09) | 6  |
| Central Sub-Saharan Africa         | 3,221(2,856-3,681)       | 18 | 9,347(8,255-10,702)      | 17 | 2.99(2.74,3.24)    | 4.15(4.07,4.22)   | 3.97(3.80,4.14)    | 3.71(3.60,3.81) | 2  |
| Eastern Sub-Saharan Africa         | 15,629(14,046-17,361)    | 10 | 41,085(36,922-45,824)    | 6  | 2.62(2.46,2.77)    | 3.60(3.50,3.69)   | 3.85(3.78,3.92)    | 3.36(3.30,3.43) | 5  |
| Southern Sub-Saharan Africa        | 7,289(6,576-8,103)       | 14 | 13,132(11,766-14,691)    | 15 | 2.53(2.40,2.65)    | 2.02(1.97,2.06)   | 1.48(1.31,1.66)    | 2.01(1.94,2.08) | 15 |
| Western Sub-Saharan Africa         | 4,675(4,135-5,320)       | 16 | 13,142(11,577-14,996)    | 14 | 3.35(3.20,3.49)    | 3.43(3.28,3.59)   | 4.28(4.08,4.48)    | 3.67(3.56,3.77) | 3  |
| <b><i>Psoriasis</i></b>            |                          |    |                          |    |                    |                   |                    |                 |    |
| East Asia                          | 813,617(784,061-843,006) | 2  | 925,967(891,325-958,216) | 2  | 0.87(0.83,0.91)    | 0.47(0.46,0.48)   | 0.01(-0.05,0.06)   | 0.45(0.43,0.47) | 17 |

|                              |                                |    |                                |    |                    |                    |                    |                    |    |
|------------------------------|--------------------------------|----|--------------------------------|----|--------------------|--------------------|--------------------|--------------------|----|
| Southeast Asia               | 94,621(91,120-98,283)          | 8  | 139,036(133,404-144,184)       | 8  | 1.54(1.53,1.56)    | 1.39(1.37,1.41)    | 1.07(0.93,1.21)    | 1.34(1.29,1.38)    | 10 |
| Oceania                      | 2,382(2,286-2,479)             | 21 | 4,694(4,512-4,889)             | 21 | 2.27(2.24,2.31)    | 2.57(2.54,2.60)    | 2.21(2.18,2.24)    | 2.36(2.34,2.39)    | 3  |
| Central Asia                 | 48,180(46,156-50,094)          | 13 | 58,976(56,469-61,360)          | 15 | 0.54(0.51,0.56)    | 0.41(0.37,0.46)    | 1.22(1.19,1.25)    | 0.70(0.68,0.72)    | 15 |
| Central Europe               | 92,543(89,254-95,815)          | 9  | 76,996(74,396-79,469)          | 12 | -0.52(-0.54,-0.50) | -0.82(-0.89,-0.76) | -0.48(-0.59,-0.36) | -0.62(-0.67,-0.58) | 21 |
| Eastern Europe               | 161,524(155,673-167,380)       | 6  | 139,976(134,745-144,910)       | 7  | -0.46(-0.58,-0.34) | -0.84(-0.92,-0.77) | -0.04(-0.10,0.01)  | -0.48(-0.53,-0.43) | 20 |
| High-income Asia Pacific     | 76,336(73,621-79,135)          | 10 | 83,991(80,923-86,862)          | 11 | 0.52(0.51,0.54)    | 0.33(0.31,0.36)    | 0.14(0.09,0.20)    | 0.34(0.32,0.36)    | 18 |
| Australasia                  | 32,497(31,226-33,743)          | 17 | 43,553(41,826-45,339)          | 18 | 1.21(1.17,1.25)    | 1.16(1.14,1.18)    | 0.68(0.64,0.72)    | 1.02(1.00,1.05)    | 12 |
| Western Europe               | 873,918(842,795-904,003)       | 1  | 946,916(913,064-979,530)       | 1  | 0.30(0.26,0.33)    | 0.43(0.39,0.46)    | 0.05(0.00,0.11)    | 0.27(0.24,0.29)    | 19 |
| Southern Latin America       | 54,019(51,757-56,252)          | 12 | 70,211(67,264-73,298)          | 13 | 0.82(0.79,0.84)    | 1.02(1.01,1.02)    | 0.90(0.89,0.92)    | 0.91(0.90,0.92)    | 14 |
| High-income North America    | 302,143(292,313-311,286)       | 4  | 359,271(347,584-370,502)       | 4  | 0.82(0.72,0.93)    | 0.31(0.19,0.44)    | 0.70(0.67,0.72)    | 0.61(0.55,0.66)    | 16 |
| Caribbean                    | 20,607(19,829-21,437)          | 19 | 27,467(26,394-28,614)          | 19 | 1.43(1.39,1.47)    | 0.81(0.80,0.82)    | 0.75(0.74,0.76)    | 1.00(0.98,1.02)    | 13 |
| Andean Latin America         | 33,750(32,270-35,227)          | 16 | 52,103(49,796-54,275)          | 17 | 1.69(1.65,1.73)    | 1.39(1.38,1.41)    | 1.46(1.34,1.58)    | 1.51(1.47,1.55)    | 6  |
| Central Latin America        | 34,843(33,618-36,214)          | 15 | 52,370(50,378-54,362)          | 16 | 1.77(1.71,1.83)    | 1.46(1.44,1.48)    | 1.03(0.97,1.09)    | 1.42(1.39,1.45)    | 8  |
| Tropical Latin America       | 134,553(129,923-139,258)       | 7  | 202,572(195,312-209,349)       | 6  | 1.62(1.62,1.63)    | 1.51(1.49,1.53)    | 1.13(1.08,1.17)    | 1.42(1.41,1.44)    | 7  |
| North Africa and Middle East | 224,312(215,902-233,060)       | 5  | 336,787(324,072-349,591)       | 5  | 1.57(1.53,1.61)    | 1.39(1.36,1.42)    | 1.27(1.24,1.31)    | 1.41(1.39,1.43)    | 9  |
| South Asia                   | 491,106(474,325-509,187)       | 3  | 792,848(765,638-821,309)       | 3  | 2.06(2.04,2.07)    | 1.72(1.70,1.74)    | 1.18(1.14,1.22)    | 1.66(1.64,1.68)    | 5  |
| Central Sub-Saharan Africa   | 30,906(29,579-32,280)          | 18 | 61,984(59,320-64,656)          | 14 | 2.67(2.63,2.72)    | 2.77(2.71,2.83)    | 1.76(1.72,1.81)    | 2.42(2.38,2.45)    | 2  |
| Eastern Sub-Saharan Africa   | 44,727(43,000-46,689)          | 14 | 89,695(86,383-93,561)          | 10 | 2.42(2.29,2.55)    | 2.57(2.49,2.65)    | 2.32(2.29,2.35)    | 2.42(2.36,2.49)    | 1  |
| Southern Sub-Saharan Africa  | 17,597(16,984-18,313)          | 20 | 25,357(24,396-26,331)          | 20 | 1.70(1.62,1.79)    | 1.01(0.92,1.09)    | 1.11(1.06,1.17)    | 1.25(1.21,1.30)    | 11 |
| Western Sub-Saharan Africa   | 69,053(66,537-71,782)          | 11 | 131,825(127,072-137,224)       | 9  | 2.31(2.25,2.36)    | 2.36(2.26,2.47)    | 2.07(1.91,2.23)    | 2.24(2.17,2.30)    | 4  |
| <i>Atopic dermatitis</i>     |                                |    |                                |    |                    |                    |                    |                    |    |
| East Asia                    | 5,008,814(4,791,100-5,211,250) | 1  | 6,080,367(5,807,761-6,330,811) | 1  | 0.63(0.61,0.66)    | 0.62(0.62,0.63)    | 0.77(0.76,0.78)    | 0.67(0.66,0.68)    | 11 |
| Southeast Asia               | 2,508,163(2,378,893-2,643,072) | 3  | 3,524,067(3,336,135-3,697,332) | 3  | 1.44(1.42,1.47)    | 1.23(1.22,1.24)    | 0.88(0.84,0.91)    | 1.18(1.16,1.19)    | 7  |
| Oceania                      | 32,286(29,914-34,610)          | 21 | 65,854(61,124-70,491)          | 21 | 2.59(2.58,2.61)    | 2.42(2.40,2.45)    | 2.46(2.43,2.49)    | 2.50(2.48,2.51)    | 3  |
| Central Asia                 | 518,253(452,966-593,851)       | 10 | 583,002(513,906-662,029)       | 11 | -0.64(-0.88,-0.40) | 0.31(0.25,0.38)    | 1.53(1.30,1.77)    | 0.40(0.29,0.52)    | 17 |
| Central Europe               | 216,330(203,707-229,301)       | 14 | 172,334(164,449-180,290)       | 16 | -1.37(-1.43,-1.32) | -0.65(-0.78,-0.52) | -0.43(-0.50,-0.35) | -0.81(-0.87,-0.75) | 21 |
| Eastern Europe               | 529,587(497,103-563,367)       | 9  | 447,762(424,028-471,302)       | 13 | -2.22(-2.40,-2.03) | -0.08(-0.18,0.01)  | 0.38(0.12,0.64)    | -0.60(-0.72,-0.49) | 20 |
| High-income Asia Pacific     | 762,674(719,624-803,368)       | 7  | 746,786(710,243-780,211)       | 9  | 0.09(0.05,0.12)    | -0.21(-0.31,-0.11) | -0.06(-0.13,0.01)  | -0.05(-0.09,-0.01) | 19 |
| Australasia                  | 65,070(60,552-69,978)          | 20 | 87,950(82,270-93,692)          | 20 | 0.92(0.85,1.00)    | 1.14(1.10,1.17)    | 1.06(1.01,1.10)    | 1.05(1.02,1.08)    | 8  |
| Western Europe               | 1,499,861(1,416,522-1,587,693) | 4  | 1,649,703(1,557,015-1,741,430) | 4  | 0.03(-0.02,0.08)   | 0.54(0.48,0.61)    | 0.30(0.25,0.34)    | 0.31(0.27,0.34)    | 18 |
| Southern Latin America       | 204,051(188,088-221,484)       | 15 | 238,534(222,335-256,745)       | 15 | 0.51(0.37,0.64)    | 0.39(0.37,0.41)    | 0.70(0.58,0.83)    | 0.54(0.48,0.60)    | 15 |
| High-income North America    | 816,447(778,446-853,366)       | 6  | 968,991(928,999-1,008,590)     | 6  | 1.49(1.35,1.64)    | -0.44(-0.50,-0.37) | 0.61(0.55,0.68)    | 0.57(0.51,0.64)    | 13 |
| Caribbean                    | 103,916(95,171-112,845)        | 18 | 119,850(110,716-128,900)       | 19 | 0.70(0.58,0.81)    | 0.32(0.23,0.40)    | 0.50(0.47,0.53)    | 0.51(0.46,0.55)    | 16 |
| Andean Latin America         | 117,267(109,117-125,225)       | 17 | 164,628(155,251-174,694)       | 17 | 1.09(1.06,1.13)    | 0.81(0.77,0.85)    | 1.75(1.63,1.87)    | 1.20(1.16,1.24)    | 6  |
| Central Latin America        | 426,931(398,511-458,889)       | 12 | 512,097(482,639-544,328)       | 12 | 1.26(1.20,1.31)    | 0.46(0.43,0.48)    | 0.17(0.13,0.21)    | 0.63(0.60,0.65)    | 12 |
| Tropical Latin America       | 532,791(502,570-566,391)       | 8  | 624,895(595,717-655,131)       | 10 | 0.55(0.51,0.59)    | 0.64(0.62,0.66)    | 0.45(0.40,0.49)    | 0.56(0.53,0.58)    | 14 |
| North Africa and Middle East | 848,965(790,033-911,474)       | 5  | 1,215,388(1,135,711-1,299,728) | 5  | 1.51(1.45,1.57)    | 1.27(1.25,1.30)    | 0.96(0.92,1.00)    | 1.25(1.22,1.28)    | 5  |
| South Asia                   | 3,929,224(3,672,984-4,212,721) | 2  | 5,045,903(4,737,984-5,382,675) | 2  | 1.39(1.35,1.43)    | 1.02(1.00,1.05)    | 0.18(0.15,0.20)    | 0.87(0.85,0.89)    | 9  |

|                             |                          |    |                            |    |                 |                 |                 |                 |    |
|-----------------------------|--------------------------|----|----------------------------|----|-----------------|-----------------|-----------------|-----------------|----|
| Central Sub-Saharan Africa  | 124,324(112,638-137,510) | 16 | 273,029(248,123-301,235)   | 14 | 2.86(2.85,2.87) | 3.05(3.04,3.07) | 2.28(2.23,2.33) | 2.75(2.73,2.77) | 2  |
| Eastern Sub-Saharan Africa  | 409,253(383,233-437,261) | 13 | 831,110(779,815-887,034)   | 8  | 2.68(2.61,2.75) | 2.64(2.60,2.68) | 2.08(2.04,2.12) | 2.48(2.45,2.51) | 4  |
| Southern Sub-Saharan Africa | 101,286(94,704-109,010)  | 19 | 129,378(121,579-138,491)   | 18 | 1.29(1.25,1.33) | 0.57(0.53,0.60) | 0.69(0.61,0.76) | 0.84(0.81,0.87) | 10 |
| Western Sub-Saharan Africa  | 431,666(405,303-459,428) | 11 | 964,390(910,096-1,023,571) | 7  | 2.85(2.82,2.89) | 3.18(3.15,3.20) | 2.35(2.26,2.45) | 2.82(2.79,2.85) | 1  |

---

**sTable 6.** The incident cases and age-standardized rate of incidence attributable to six immune mediated inflammatory diseases according to countries and territories and its temporal trends from 1990 to 2019.

|                                       | 1990                   |      | 2019                  |      | 1990-1999          |                    | 2000-2009          |                    | 2010-2019   |             | 1990-2019 |  |
|---------------------------------------|------------------------|------|-----------------------|------|--------------------|--------------------|--------------------|--------------------|-------------|-------------|-----------|--|
|                                       | N(95%CI)               | Rank | N(95%CI)              | Rank | AAPC(95%CI)        | AAPC(95%CI)        | AAPC(95%CI)        | AAPC(95%CI)        | AAPC(95%CI) | AAPC(95%CI) | Rank      |  |
| <b>Age standardized rate</b>          |                        |      |                       |      |                    |                    |                    |                    |             |             |           |  |
| <i>Asthma</i>                         |                        |      |                       |      |                    |                    |                    |                    |             |             |           |  |
| China                                 | 394.58(295.36-529.45)  | 186  | 355.33(259.68-492.64) | 191  | -2.72(-3.07,-2.38) | -1.86(-2.31,-1.40) | 3.08(-1.62,8.00)   | -0.55(-2.03,0.95)  | 144         |             |           |  |
| Democratic People's Republic of Korea | 542.62(426.50-688.82)  | 141  | 534.72(427.35-669.82) | 119  | 0.66(0.48,0.85)    | -0.45(-0.60,-0.29) | -0.47(-0.59,-0.35) | -0.11(-0.20,-0.02) | 70          |             |           |  |
| Taiwan (Province of China)            | 581.13(467.25-733.13)  | 118  | 543.56(414.25-731.18) | 110  | 1.37(0.50,2.26)    | -0.21(-0.35,-0.06) | -1.87(-3.44,-0.27) | -0.24(-0.81,0.34)  | 89          |             |           |  |
| Cambodia                              | 375.03(302.63-460.88)  | 190  | 414.91(329.42-525.97) | 177  | -0.71(-0.87,-0.56) | 0.52(0.30,0.73)    | 1.46(1.22,1.70)    | 0.42(0.30,0.55)    | 7           |             |           |  |
| Indonesia                             | 583.45(477.68-717.07)  | 117  | 544.94(437.00-681.94) | 107  | -1.30(-1.49,-1.11) | 0.75(0.49,1.00)    | -0.34(-0.98,0.31)  | -0.29(-0.52,-0.06) | 98          |             |           |  |
| Lao People's Democratic Republic      | 417.34(345.44-504.36)  | 181  | 368.90(303.60-453.78) | 186  | -0.69(-0.79,-0.60) | -0.63(-0.67,-0.59) | 0.09(-0.01,0.19)   | -0.44(-0.49,-0.39) | 129         |             |           |  |
| Malaysia                              | 480.71(402.95-575.60)  | 161  | 433.51(339.20-569.29) | 171  | -0.68(-0.81,-0.55) | -0.03(-0.55,0.50)  | -0.37(-1.08,0.34)  | -0.41(-0.70,-0.11) | 121         |             |           |  |
| Maldives                              | 595.28(484.98-737.89)  | 111  | 421.60(319.95-549.79) | 174  | -1.45(-1.53,-1.37) | -1.93(-1.97,-1.88) | 0.06(-0.06,0.18)   | -1.16(-1.21,-1.11) | 195         |             |           |  |
| Myanmar                               | 384.93(329.60-452.56)  | 189  | 358.26(303.33-431.55) | 189  | -0.69(-0.75,-0.63) | -0.43(-0.46,-0.40) | 0.46(0.38,0.53)    | -0.24(-0.28,-0.21) | 90          |             |           |  |
| Philippines                           | 904.92(720.28-1162.25) | 28   | 742.69(590.99-952.72) | 37   | -1.13(-1.20,-1.06) | -0.51(-0.52,-0.49) | -0.35(-0.43,-0.26) | -0.68(-0.72,-0.65) | 168         |             |           |  |
| Sri Lanka                             | 541.33(459.02-635.65)  | 142  | 563.80(474.79-681.31) | 96   | 0.35(0.32,0.38)    | -0.02(-0.08,0.04)  | 0.10(0.03,0.17)    | 0.13(0.10,0.16)    | 26          |             |           |  |
| Thailand                              | 561.66(470.99-678.15)  | 126  | 535.35(419.88-686.45) | 116  | -0.07(-0.18,0.03)  | -1.20(-1.67,-0.73) | 1.17(0.32,2.02)    | -0.16(-0.49,0.17)  | 78          |             |           |  |
| Timor-Leste                           | 526.94(431.19-643.72)  | 146  | 483.86(395.99-593.85) | 143  | -0.61(-0.71,-0.50) | -0.53(-0.59,-0.48) | 0.35(0.24,0.45)    | -0.29(-0.34,-0.23) | 99          |             |           |  |
| Viet Nam                              | 422.53(341.27-528.99)  | 176  | 485.57(391.94-612.69) | 141  | 1.13(0.77,1.49)    | -0.50(-0.86,-0.14) | 0.90(0.65,1.16)    | 0.49(0.28,0.69)    | 4           |             |           |  |
| Fiji                                  | 710.93(606.52-830.20)  | 65   | 540.26(451.09-655.47) | 112  | -0.64(-0.76,-0.52) | -1.82(-1.91,-1.72) | -0.24(-0.48,0.01)  | -0.93(-1.03,-0.83) | 183         |             |           |  |
| Kiribati                              | 886.31(756.86-1029.76) | 32   | 696.82(599.47-812.23) | 43   | -0.53(-0.56,-0.50) | -1.12(-1.14,-1.10) | -0.77(-0.81,-0.73) | -0.82(-0.84,-0.80) | 181         |             |           |  |
| Marshall Islands                      | 598.88(507.55-704.02)  | 109  | 511.09(407.53-635.32) | 130  | -1.17(-1.24,-1.10) | -1.17(-1.24,-1.10) | 1.36(0.84,1.88)    | -0.39(-0.56,-0.22) | 116         |             |           |  |
| Micronesia (Federated States of)      | 592.65(493.82-699.58)  | 113  | 528.02(411.24-662.60) | 122  | -1.11(-1.17,-1.05) | -1.11(-1.17,-1.05) | 1.37(0.04,2.72)    | -0.35(-0.76,0.07)  | 105         |             |           |  |
| Papua New Guinea                      | 847.78(717.77-982.73)  | 42   | 704.16(603.93-818.13) | 41   | -0.06(-0.11,-0.02) | -1.14(-1.25,-1.04) | -0.73(-0.78,-0.68) | -0.66(-0.70,-0.62) | 163         |             |           |  |
| Samoa                                 | 555.93(455.26-675.20)  | 132  | 498.73(391.04-635.58) | 137  | -1.06(-1.12,-1.00) | -0.77(-0.78,-0.76) | 0.85(0.68,1.01)    | -0.36(-0.42,-0.31) | 107         |             |           |  |
| Solomon Islands                       | 593.79(488.63-708.38)  | 112  | 567.36(455.13-713.71) | 95   | -0.88(-1.66,-0.10) | -0.95(-1.15,-0.74) | 1.88(1.39,2.38)    | -0.06(-0.36,0.24)  | 60          |             |           |  |
| Tonga                                 | 683.33(555.51-857.68)  | 74   | 599.07(467.86-762.30) | 77   | -0.49(-0.96,-0.02) | -1.38(-1.55,-1.20) | 0.74(0.39,1.10)    | -0.39(-0.60,-0.18) | 117         |             |           |  |
| Vanuatu                               | 549.66(454.61-656.06)  | 137  | 524.55(380.17-684.89) | 125  | -1.42(-1.51,-1.32) | -1.42(-1.51,-1.32) | 3.12(0.91,5.37)    | -0.03(-0.70,0.65)  | 56          |             |           |  |
| Armenia                               | 333.69(253.18-432.43)  | 197  | 352.22(257.28-462.20) | 192  | -0.47(-0.63,-0.32) | 0.19(0.16,0.22)    | 1.01(0.83,1.18)    | 0.23(0.16,0.31)    | 16          |             |           |  |
| Azerbaijan                            | 351.95(275.37-451.46)  | 195  | 343.45(261.91-445.74) | 195  | -0.65(-0.75,-0.54) | -0.33(-0.46,-0.19) | 1.03(0.65,1.40)    | 0.00(-0.15,0.16)   | 50          |             |           |  |
| Georgia                               | 343.46(279.10-431.30)  | 196  | 342.53(257.82-452.18) | 196  | -0.42(-0.96,0.13)  | 0.68(0.15,1.20)    | 0.06(-0.29,0.42)   | 0.06(-0.21,0.34)   | 37          |             |           |  |
| Kazakhstan                            | 279.75(219.89-350.81)  | 201  | 285.86(219.41-366.73) | 199  | -1.25(-1.45,-1.05) | 0.05(-0.03,0.14)   | 1.59(1.36,1.83)    | 0.13(0.01,0.24)    | 27          |             |           |  |
| Kyrgyzstan                            | 476.68(388.55-594.20)  | 165  | 394.33(299.15-513.70) | 180  | -1.20(-1.41,-0.98) | -0.86(-0.96,-0.76) | 0.16(-0.20,0.51)   | -0.66(-0.80,-0.52) | 164         |             |           |  |
| Mongolia                              | 408.26(332.10-498.65)  | 182  | 361.35(279.74-462.22) | 188  | -0.73(-0.86,-0.61) | -0.70(-0.72,-0.68) | 0.25(0.18,0.33)    | -0.42(-0.46,-0.37) | 124         |             |           |  |
| Tajikistan                            | 407.07(325.40-503.26)  | 184  | 385.31(297.29-491.32) | 183  | -0.72(-0.90,-0.53) | -0.44(-0.50,-0.37) | 0.67(0.49,0.85)    | -0.17(-0.27,-0.08) | 80          |             |           |  |
| Turkmenistan                          | 432.38(352.21-540.56)  | 174  | 344.47(254.91-456.33) | 194  | -1.62(-1.72,-1.52) | -1.55(-1.81,-1.30) | 1.01(0.80,1.23)    | -0.74(-0.85,-0.62) | 174         |             |           |  |
| Uzbekistan                            | 560.81(454.97-685.96)  | 128  | 469.12(372.19-595.28) | 151  | -0.29(-0.39,-0.20) | -1.53(-1.63,-1.43) | 0.09(-0.06,0.24)   | -0.64(-0.71,-0.56) | 159         |             |           |  |

|                        |                         |     |                        |     |                    |                    |                    |                    |     |
|------------------------|-------------------------|-----|------------------------|-----|--------------------|--------------------|--------------------|--------------------|-----|
| Albania                | 418.16(350.48-518.12)   | 180 | 453.34(361.82-573.26)  | 160 | -0.65(-0.82,-0.48) | 1.13(0.83,1.43)    | 0.44(-0.37,1.26)   | 0.32(0.04,0.60)    | 10  |
| Bosnia and Herzegovina | 638.77(518.91-795.32)   | 96  | 636.76(506.83-806.55)  | 63  | -0.08(-0.19,0.04)  | -0.04(-0.26,0.19)  | 0.05(0.02,0.08)    | -0.01(-0.09,0.07)  | 53  |
| Bulgaria               | 580.52(475.61-716.11)   | 119 | 535.93(418.26-677.37)  | 114 | -0.81(-1.18,-0.43) | -0.15(-0.27,-0.03) | 0.24(0.13,0.34)    | -0.27(-0.42,-0.11) | 93  |
| Croatia                | 694.89(562.89-854.67)   | 70  | 585.73(465.67-736.93)  | 85  | -0.88(-1.11,-0.65) | -0.83(-0.92,-0.74) | 0.15(-0.12,0.41)   | -0.58(-0.70,-0.45) | 147 |
| Czechia                | 471.45(370.23-598.68)   | 166 | 472.29(368.37-605.33)  | 148 | -0.40(-0.64,-0.16) | -0.06(-0.15,0.04)  | 0.71(0.50,0.93)    | 0.05(-0.08,0.17)   | 38  |
| Hungary                | 559.96(450.26-694.95)   | 129 | 501.38(392.64-635.74)  | 135 | -1.01(-1.48,-0.55) | 0.13(-0.40,0.67)   | -0.22(-0.51,0.07)  | -0.41(-0.66,-0.16) | 122 |
| North Macedonia        | 848.06(674.93-1056.58)  | 41  | 709.20(584.54-868.07)  | 40  | -0.14(-0.47,0.18)  | -1.66(-2.03,-1.29) | 0.00(-0.08,0.08)   | -0.62(-0.79,-0.45) | 157 |
| Montenegro             | 495.01(385.18-630.44)   | 157 | 537.87(421.17-693.12)  | 113 | -0.21(-0.53,0.10)  | 0.19(0.12,0.27)    | 1.09(0.81,1.37)    | 0.34(0.21,0.48)    | 9   |
| Poland                 | 1065.27(883.56-1281.61) | 8   | 780.71(606.61-1005.19) | 31  | -0.85(-1.10,-0.59) | -1.75(-1.86,-1.63) | -0.65(-0.77,-0.52) | -1.12(-1.24,-1.01) | 192 |
| Romania                | 597.20(481.50-757.78)   | 110 | 601.56(468.94-768.93)  | 76  | 0.28(0.15,0.42)    | -0.12(-0.25,0.02)  | -0.03(-0.15,0.09)  | 0.02(-0.06,0.11)   | 43  |
| Serbia                 | 483.07(391.95-598.76)   | 159 | 451.53(356.39-571.51)  | 162 | -0.13(-0.18,-0.08) | -0.46(-0.47,-0.44) | -0.04(-0.10,0.01)  | -0.23(-0.25,-0.20) | 86  |
| Slovakia               | 455.71(361.64-574.77)   | 169 | 455.76(355.33-579.07)  | 158 | -0.36(-0.45,-0.27) | 0.11(-0.08,0.30)   | 0.22(-0.21,0.66)   | -0.01(-0.16,0.15)  | 54  |
| Slovenia               | 748.63(617.57-913.99)   | 56  | 645.40(509.37-818.18)  | 61  | -0.57(-0.69,-0.44) | -0.73(-0.76,-0.70) | -0.13(-0.26,0.01)  | -0.49(-0.55,-0.43) | 134 |
| Belarus                | 685.00(551.35-845.20)   | 73  | 534.85(406.63-698.11)  | 118 | -1.08(-1.28,-0.88) | -1.79(-1.94,-1.64) | 0.61(0.32,0.89)    | -0.81(-0.95,-0.68) | 180 |
| Estonia                | 431.52(346.92-525.58)   | 175 | 363.10(270.06-472.99)  | 187 | -0.37(-0.50,-0.24) | -2.86(-3.26,-2.46) | 2.15(1.31,3.00)    | -0.54(-0.84,-0.23) | 142 |
| Latvia                 | 610.39(512.40-742.95)   | 107 | 508.56(382.27-659.87)  | 133 | -1.76(-1.81,-1.71) | 0.09(-0.03,0.22)   | 0.01(-0.11,0.13)   | -0.59(-0.65,-0.54) | 152 |
| Lithuania              | 469.52(379.23-579.78)   | 167 | 448.71(333.41-581.33)  | 165 | -1.44(-1.54,-1.33) | 1.00(0.73,1.28)    | 0.34(0.10,0.59)    | -0.10(-0.22,0.03)  | 68  |
| Republic of Moldova    | 530.18(421.20-676.84)   | 144 | 453.48(339.57-600.80)  | 159 | -0.71(-0.76,-0.66) | -1.03(-1.12,-0.94) | 0.22(0.12,0.33)    | -0.52(-0.57,-0.46) | 139 |
| Russian Federation     | 657.99(527.09-833.14)   | 83  | 434.05(319.40-575.98)  | 170 | -1.22(-1.41,-1.02) | -2.86(-3.04,-2.68) | 0.12(-0.27,0.51)   | -1.40(-1.57,-1.23) | 202 |
| Ukraine                | 682.78(515.12-875.35)   | 75  | 552.68(398.88-743.62)  | 102 | -0.94(-1.17,-0.72) | -1.67(-1.86,-1.47) | 0.81(0.45,1.16)    | -0.67(-0.84,-0.50) | 167 |
| Brunei Darussalam      | 669.84(547.83-827.37)   | 79  | 622.60(504.15-773.55)  | 69  | 0.37(0.13,0.60)    | -0.76(-0.83,-0.70) | -0.30(-0.46,-0.14) | -0.27(-0.36,-0.18) | 94  |
| Japan                  | 963.11(785.39-1201.19)  | 19  | 584.11(439.70-775.33)  | 86  | -2.32(-2.48,-2.16) | -4.23(-4.30,-4.15) | 1.46(1.05,1.87)    | -1.73(-1.87,-1.59) | 204 |
| Republic of Korea      | 586.87(486.52-715.45)   | 114 | 510.52(400.45-652.89)  | 131 | -0.89(-1.10,-0.68) | -0.01(-0.22,0.21)  | -0.42(-0.48,-0.35) | -0.51(-0.62,-0.41) | 137 |
| Singapore              | 693.90(575.23-830.60)   | 71  | 500.44(386.25-653.54)  | 136 | -1.82(-2.01,-1.63) | -1.16(-1.29,-1.04) | -0.21(-0.30,-0.11) | -1.12(-1.21,-1.03) | 193 |
| Australia              | 748.63(585.44-918.13)   | 57  | 598.70(458.18-769.55)  | 78  | 0.69(0.51,0.88)    | -3.35(-3.63,-3.07) | 0.17(-0.26,0.61)   | -0.79(-0.98,-0.60) | 178 |
| New Zealand            | 967.25(754.33-1222.76)  | 16  | 702.45(520.34-936.85)  | 42  | -1.67(-1.87,-1.47) | -1.22(-1.38,-1.07) | -0.31(-0.39,-0.23) | -1.12(-1.22,-1.03) | 194 |
| Andorra                | 525.67(417.32-655.61)   | 147 | 484.22(374.98-612.01)  | 142 | -0.36(-0.40,-0.31) | -0.57(-0.59,-0.55) | 0.11(0.05,0.17)    | -0.28(-0.31,-0.25) | 95  |
| Austria                | 525.10(439.60-633.31)   | 148 | 449.81(351.51-562.99)  | 163 | -0.94(-1.17,-0.70) | -0.18(-0.34,-0.02) | -0.54(-0.72,-0.35) | -0.59(-0.70,-0.47) | 153 |
| Belgium                | 547.28(461.73-657.80)   | 140 | 417.30(322.27-519.50)  | 176 | -2.76(-3.33,-2.20) | 0.90(0.51,1.29)    | -0.90(-1.22,-0.58) | -1.08(-1.33,-0.82) | 190 |
| Cyprus                 | 568.60(456.94-703.71)   | 122 | 546.48(432.11-683.41)  | 106 | -0.80(-0.84,-0.76) | 0.01(0.00,0.02)    | 0.33(0.28,0.39)    | -0.13(-0.15,-0.10) | 74  |
| Denmark                | 549.94(450.69-675.35)   | 136 | 467.94(359.21-597.18)  | 152 | -0.77(-0.93,-0.62) | -0.30(-0.79,0.20)  | -0.94(-1.86,-0.02) | -0.64(-0.99,-0.29) | 160 |
| Finland                | 487.44(396.71-601.07)   | 158 | 456.87(361.73-567.13)  | 157 | 0.08(0.02,0.14)    | -0.09(-0.21,0.03)  | -0.58(-0.69,-0.46) | -0.22(-0.27,-0.16) | 85  |
| France                 | 646.62(544.89-786.56)   | 91  | 522.36(410.41-651.31)  | 127 | -1.38(-1.83,-0.92) | -0.88(-0.94,-0.82) | 0.05(-0.37,0.47)   | -0.75(-0.94,-0.55) | 175 |
| Germany                | 558.74(465.31-660.93)   | 131 | 390.99(300.53-495.42)  | 182 | -3.79(-4.38,-3.20) | 0.81(0.24,1.37)    | -0.92(-1.09,-0.74) | -1.36(-1.64,-1.08) | 201 |
| Greece                 | 464.12(378.44-575.60)   | 168 | 451.83(352.34-563.85)  | 161 | -0.66(-0.88,-0.44) | 0.72(0.61,0.82)    | -0.42(-0.52,-0.33) | -0.11(-0.19,-0.02) | 71  |
| Iceland                | 857.85(676.21-1065.53)  | 39  | 695.50(545.90-881.69)  | 44  | -0.56(-1.03,-0.08) | -1.46(-1.70,-1.22) | -0.18(-0.53,0.16)  | -0.72(-0.94,-0.49) | 173 |
| Ireland                | 693.67(571.77-838.77)   | 72  | 535.46(420.28-664.27)  | 115 | -1.07(-1.24,-0.91) | -0.64(-0.90,-0.39) | -1.15(-1.87,-0.43) | -0.95(-1.20,-0.70) | 185 |
| Israel                 | 519.52(420.37-637.78)   | 152 | 439.70(339.13-548.97)  | 167 | -1.14(-1.25,-1.04) | -0.52(-0.56,-0.48) | 0.08(0.01,0.16)    | -0.58(-0.63,-0.53) | 148 |



|                                  |                          |     |                          |     |                    |                    |                    |                    |     |
|----------------------------------|--------------------------|-----|--------------------------|-----|--------------------|--------------------|--------------------|--------------------|-----|
| Italy                            | 522.30(430.38-634.44)    | 150 | 447.73(330.69-574.70)    | 166 | -1.02(-1.63,-0.41) | -0.37(-1.66,0.95)  | -0.47(-1.01,0.07)  | -0.68(-1.17,-0.18) | 169 |
| Luxembourg                       | 638.97(508.83-819.85)    | 95  | 526.32(409.87-657.79)    | 123 | -0.27(-0.45,-0.09) | -1.13(-1.18,-1.09) | -0.59(-0.77,-0.40) | -0.70(-0.78,-0.61) | 171 |
| Malta                            | 630.61(528.06-753.98)    | 100 | 543.14(427.58-675.99)    | 111 | -0.78(-0.92,-0.64) | -0.42(-0.46,-0.39) | -0.28(-0.51,-0.05) | -0.53(-0.62,-0.44) | 141 |
| Netherlands                      | 363.72(303.17-436.48)    | 193 | 332.70(270.47-401.54)    | 197 | 0.13(-0.24,0.50)   | -1.67(-1.79,-1.55) | 1.03(0.91,1.15)    | -0.28(-0.41,-0.15) | 96  |
| Norway                           | 901.39(737.96-1101.35)   | 29  | 650.21(498.29-826.89)    | 59  | -1.07(-1.19,-0.94) | -1.40(-1.57,-1.23) | -0.88(-1.45,-0.31) | -1.16(-1.40,-0.93) | 196 |
| Portugal                         | 724.55(600.98-891.19)    | 62  | 636.31(503.81-787.32)    | 64  | -1.35(-1.85,-0.85) | 1.39(1.09,1.68)    | -1.18(-1.40,-0.95) | -0.55(-0.76,-0.34) | 145 |
| Spain                            | 447.14(361.68-556.63)    | 171 | 463.66(364.70-581.08)    | 155 | -0.93(-1.03,-0.84) | 1.58(1.46,1.71)    | -0.38(-0.76,0.00)  | 0.11(-0.02,0.24)   | 29  |
| Sweden                           | 839.68(688.11-1029.83)   | 45  | 611.44(467.07-789.49)    | 73  | -3.04(-3.16,-2.91) | -1.64(-1.96,-1.31) | 1.38(0.57,2.19)    | -1.16(-1.44,-0.88) | 197 |
| Switzerland                      | 620.67(503.78-761.07)    | 103 | 525.15(411.55-668.59)    | 124 | -0.70(-0.73,-0.67) | -1.05(-1.08,-1.02) | 0.04(-0.03,0.11)   | -0.58(-0.61,-0.55) | 149 |
| United Kingdom                   | 989.29(792.45-1209.39)   | 14  | 757.03(585.46-955.27)    | 34  | -1.05(-2.08,0.00)  | -1.03(-1.16,-0.89) | -1.03(-1.16,-0.89) | -1.03(-1.37,-0.70) | 189 |
| Argentina                        | 760.86(633.95-926.74)    | 54  | 781.45(620.88-986.36)    | 30  | 0.26(0.17,0.34)    | 0.31(0.27,0.36)    | -0.26(-0.31,-0.20) | 0.08(0.04,0.12)    | 33  |
| Chile                            | 653.41(540.02-801.02)    | 86  | 645.84(514.69-820.60)    | 60  | 0.14(0.03,0.25)    | -0.75(-0.86,-0.63) | 0.73(0.53,0.92)    | 0.01(-0.08,0.10)   | 48  |
| Uruguay                          | 754.13(620.16-924.96)    | 55  | 691.25(549.72-873.41)    | 45  | -0.59(-0.70,-0.47) | -0.41(-0.83,0.00)  | 0.09(-0.11,0.28)   | -0.33(-0.50,-0.17) | 104 |
| Canada                           | 845.76(671.64-1070.35)   | 43  | 783.77(611.28-994.67)    | 29  | 0.32(-0.16,0.81)   | 0.54(0.37,0.72)    | -1.15(-1.72,-0.57) | -0.17(-0.44,0.09)  | 81  |
| United States of America         | 1404.61(1077.50-1842.92) | 1   | 1547.24(1251.20-1899.94) | 1   | -2.87(-3.29,-2.45) | 2.62(2.33,2.91)    | 1.12(0.87,1.37)    | 0.40(0.20,0.61)    | 8   |
| Antigua and Barbuda              | 875.33(675.98-1143.74)   | 37  | 918.52(698.96-1177.53)   | 17  | -0.06(-0.36,0.24)  | 0.02(-0.08,0.12)   | 0.69(0.47,0.92)    | 0.22(0.09,0.35)    | 18  |
| Bahamas                          | 882.20(685.43-1145.21)   | 33  | 918.06(697.41-1185.11)   | 18  | 0.03(-0.24,0.31)   | -0.08(-0.17,0.00)  | 0.60(0.41,0.80)    | 0.19(0.07,0.31)    | 20  |
| Barbados                         | 951.02(764.25-1192.76)   | 21  | 1028.32(795.41-1318.23)  | 7   | 0.09(0.02,0.16)    | 0.76(0.63,0.88)    | -0.17(-0.50,0.17)  | 0.25(0.13,0.36)    | 12  |
| Belize                           | 948.57(740.74-1194.64)   | 22  | 906.64(693.53-1157.77)   | 20  | -0.07(-0.47,0.32)  | -0.41(-0.47,-0.34) | 0.23(-0.13,0.59)   | -0.11(-0.28,0.07)  | 72  |
| Cuba                             | 1045.33(814.05-1325.04)  | 10  | 1047.77(802.46-1343.96)  | 6   | 0.03(-0.04,0.10)   | -0.19(-0.34,-0.05) | 0.29(0.16,0.41)    | 0.04(-0.03,0.11)   | 39  |
| Dominica                         | 964.32(762.74-1212.97)   | 18  | 1012.45(789.50-1281.00)  | 9   | 0.65(0.52,0.79)    | 0.01(-0.05,0.06)   | -0.10(-0.22,0.02)  | 0.19(0.12,0.25)    | 21  |
| Dominican Republic               | 706.06(557.48-873.94)    | 67  | 687.85(533.14-892.07)    | 46  | -1.61(-1.86,-1.36) | 0.93(0.70,1.16)    | 0.71(0.14,1.28)    | 0.00(-0.22,0.23)   | 51  |
| Grenada                          | 1023.66(788.30-1307.80)  | 12  | 1059.01(824.14-1363.18)  | 5   | 0.08(0.03,0.13)    | -0.06(-0.08,-0.04) | 0.36(0.31,0.41)    | 0.12(0.09,0.14)    | 28  |
| Guyana                           | 964.67(769.58-1199.63)   | 17  | 945.61(743.84-1197.21)   | 11  | 0.23(0.07,0.39)    | -0.58(-0.64,-0.51) | 0.25(0.13,0.37)    | -0.05(-0.13,0.02)  | 59  |
| Haiti                            | 1182.75(943.01-1447.88)  | 7   | 1061.05(847.11-1313.37)  | 3   | -0.34(-0.41,-0.27) | -0.75(-0.79,-0.71) | 0.06(-0.02,0.13)   | -0.36(-0.41,-0.32) | 108 |
| Jamaica                          | 1038.21(814.51-1324.25)  | 11  | 925.34(713.71-1194.11)   | 14  | -0.22(-0.38,-0.07) | -0.89(-0.92,-0.85) | 0.05(-0.44,0.53)   | -0.39(-0.55,-0.23) | 118 |
| Saint Lucia                      | 1014.96(803.87-1272.23)  | 13  | 999.01(777.10-1265.24)   | 10  | 0.35(0.30,0.39)    | -0.55(-0.57,-0.52) | 0.13(-0.08,0.33)   | -0.06(-0.13,0.00)  | 61  |
| Saint Vincent and the Grenadines | 907.49(711.72-1161.34)   | 27  | 920.12(710.22-1172.12)   | 16  | -0.23(-0.40,-0.06) | -0.10(-0.21,0.02)  | 0.65(0.45,0.85)    | 0.09(-0.01,0.20)   | 32  |
| Suriname                         | 878.96(684.54-1138.77)   | 34  | 885.31(678.41-1145.34)   | 22  | -0.19(-0.20,-0.17) | -0.19(-0.20,-0.17) | 0.54(0.32,0.76)    | 0.04(-0.03,0.11)   | 40  |
| Trinidad and Tobago              | 723.46(567.58-925.00)    | 63  | 801.89(604.25-1052.94)   | 28  | -0.15(-0.28,-0.03) | -0.15(-0.28,-0.03) | 2.24(1.46,3.02)    | 0.58(0.32,0.84)    | 3   |
| Bolivia (Plurinational State of) | 915.01(693.30-1157.15)   | 26  | 768.28(577.27-1028.77)   | 33  | -0.80(-0.99,-0.61) | -1.04(-1.12,-0.96) | 0.27(0.08,0.45)    | -0.59(-0.68,-0.49) | 154 |
| Ecuador                          | 877.93(656.25-1142.75)   | 35  | 728.08(535.41-985.52)    | 38  | -1.53(-2.05,-1.01) | -0.99(-1.57,-0.42) | 0.87(0.74,1.00)    | -0.66(-0.93,-0.38) | 165 |
| Peru                             | 956.31(715.69-1242.62)   | 20  | 774.98(573.45-1051.45)   | 32  | -0.66(-0.81,-0.52) | -2.08(-2.29,-1.86) | 0.68(0.53,0.83)    | -0.79(-0.90,-0.68) | 179 |
| Colombia                         | 761.12(595.29-965.90)    | 53  | 613.08(452.56-809.54)    | 71  | -1.72(-2.61,-0.81) | -0.69(-1.02,-0.36) | 0.38(0.26,0.51)    | -0.69(-1.00,-0.37) | 170 |
| Costa Rica                       | 969.86(757.97-1219.63)   | 15  | 847.63(642.09-1101.32)   | 26  | 0.79(0.63,0.95)    | -1.77(-2.38,-1.15) | -0.08(-0.34,0.17)  | -0.42(-0.65,-0.19) | 125 |
| El Salvador                      | 1212.32(933.75-1536.01)  | 5   | 844.10(652.44-1093.89)   | 27  | -1.34(-1.48,-1.21) | -1.90(-2.00,-1.80) | -0.34(-0.47,-0.22) | -1.27(-1.34,-1.19) | 200 |
| Guatemala                        | 855.42(659.56-1065.97)   | 40  | 530.28(397.11-705.03)    | 120 | -2.05(-2.34,-1.75) | -2.60(-3.25,-1.94) | -0.38(-0.48,-0.28) | -1.71(-1.95,-1.46) | 203 |
| Honduras                         | 890.59(683.83-1123.42)   | 31  | 662.58(505.46-863.27)    | 54  | -0.72(-0.95,-0.49) | -1.73(-1.79,-1.66) | -0.43(-0.69,-0.17) | -1.01(-1.13,-0.90) | 187 |

|                                    |                         |     |                        |     |                    |                    |                    |                    |     |
|------------------------------------|-------------------------|-----|------------------------|-----|--------------------|--------------------|--------------------|--------------------|-----|
| Mexico                             | 606.68(466.31-796.02)   | 108 | 523.83(370.22-712.36)  | 126 | -2.02(-2.32,-1.72) | -0.51(-0.78,-0.25) | 1.27(1.19,1.36)    | -0.52(-0.67,-0.37) | 140 |
| Nicaragua                          | 915.63(708.01-1175.31)  | 25  | 653.10(490.42-859.18)  | 57  | -1.50(-2.19,-0.81) | -1.28(-1.60,-0.96) | -0.73(-0.82,-0.64) | -1.20(-1.45,-0.94) | 199 |
| Panama                             | 860.31(674.27-1078.62)  | 38  | 748.52(566.80-977.71)  | 36  | -0.28(-0.47,-0.09) | -0.80(-0.89,-0.71) | -0.28(-0.50,-0.06) | -0.48(-0.59,-0.37) | 133 |
| Venezuela (Bolivarian Republic of) | 770.56(592.13-991.30)   | 51  | 668.58(500.46-871.93)  | 53  | -0.53(-0.66,-0.40) | -0.84(-0.89,-0.78) | 0.06(-0.05,0.17)   | -0.50(-0.56,-0.43) | 135 |
| Brazil                             | 1053.29(774.10-1398.37) | 9   | 916.35(643.52-1221.96) | 19  | -0.67(-0.94,-0.40) | -1.42(-1.54,-1.30) | 0.85(0.53,1.16)    | -0.50(-0.65,-0.35) | 136 |
| Paraguay                           | 810.59(610.76-1066.71)  | 49  | 924.14(682.94-1226.46) | 15  | 0.41(0.38,0.43)    | 0.41(0.38,0.43)    | 0.66(0.51,0.82)    | 0.49(0.43,0.54)    | 5   |
| Algeria                            | 506.60(414.46-621.58)   | 155 | 534.87(419.08-677.12)  | 117 | -0.43(-0.55,-0.31) | 0.08(-0.26,0.42)   | 1.14(0.94,1.35)    | 0.22(0.09,0.36)    | 19  |
| Bahrain                            | 656.32(531.21-810.75)   | 85  | 586.34(459.84-738.65)  | 84  | -0.15(-0.25,-0.06) | -0.91(-0.94,-0.88) | -0.01(-0.09,0.07)  | -0.36(-0.41,-0.32) | 109 |
| Egypt                              | 584.67(471.33-723.49)   | 116 | 554.85(444.07-692.03)  | 100 | -0.65(-0.71,-0.58) | -0.48(-0.51,-0.45) | 0.71(0.63,0.79)    | -0.16(-0.20,-0.12) | 79  |
| Iran (Islamic Republic of)         | 646.00(516.21-800.13)   | 92  | 544.09(418.92-689.93)  | 109 | -0.15(-0.23,-0.07) | -1.32(-1.38,-1.25) | -0.21(-0.28,-0.14) | -0.61(-0.66,-0.57) | 156 |
| Iraq                               | 696.37(567.01-848.57)   | 69  | 555.57(436.74-709.95)  | 99  | -0.88(-0.90,-0.86) | -0.97(-0.98,-0.96) | -0.45(-0.48,-0.42) | -0.78(-0.80,-0.77) | 177 |
| Jordan                             | 631.38(501.24-795.96)   | 99  | 629.02(485.06-805.67)  | 67  | 0.01(-0.11,0.12)   | -0.31(-0.35,-0.28) | 0.35(0.24,0.47)    | 0.02(-0.04,0.08)   | 44  |
| Kuwait                             | 659.01(521.58-822.27)   | 82  | 641.21(484.83-830.32)  | 62  | -0.66(-0.70,-0.62) | 0.18(0.08,0.28)    | 0.16(-0.04,0.36)   | -0.09(-0.17,-0.02) | 67  |
| Lebanon                            | 661.01(538.02-821.45)   | 81  | 671.71(533.78-842.60)  | 51  | -0.08(-0.14,-0.02) | -0.12(-0.16,-0.08) | 0.46(0.38,0.55)    | 0.07(0.04,0.11)    | 34  |
| Libya                              | 622.76(501.50-758.50)   | 102 | 589.80(467.82-727.84)  | 83  | -0.53(-0.69,-0.37) | -0.21(-0.27,-0.15) | 0.29(0.13,0.45)    | -0.18(-0.26,-0.09) | 82  |
| Morocco                            | 451.35(365.75-551.69)   | 170 | 487.80(390.15-613.38)  | 139 | 0.02(-0.05,0.09)   | -0.04(-0.08,0.00)  | 0.91(0.82,1.00)    | 0.28(0.23,0.32)    | 11  |
| Palestine                          | 558.87(448.40-693.06)   | 130 | 547.77(427.08-693.22)  | 104 | -0.96(-1.09,-0.82) | -0.03(-0.08,0.03)  | 0.91(0.75,1.07)    | -0.03(-0.10,0.04)  | 57  |
| Oman                               | 480.51(378.41-606.50)   | 162 | 616.57(477.55-787.33)  | 70  | -0.35(-0.50,-0.21) | 1.72(1.52,1.92)    | 1.47(0.87,2.08)    | 0.93(0.73,1.14)    | 1   |
| Qatar                              | 551.73(425.25-709.91)   | 134 | 554.69(429.44-710.98)  | 101 | 0.21(0.14,0.27)    | -0.66(-0.74,-0.57) | 0.60(0.27,0.92)    | 0.02(-0.08,0.13)   | 45  |
| Saudi Arabia                       | 373.60(298.39-461.44)   | 191 | 461.34(354.28-587.67)  | 156 | 0.02(-0.13,0.17)   | 1.44(1.02,1.87)    | 0.89(0.42,1.37)    | 0.74(0.54,0.95)    | 2   |
| Syrian Arab Republic               | 540.62(443.66-655.86)   | 143 | 544.30(439.39-668.84)  | 108 | -1.14(-1.81,-0.48) | 1.28(0.87,1.69)    | -0.21(-0.68,0.26)  | 0.00(-0.32,0.32)   | 52  |
| Tunisia                            | 562.55(462.36-695.76)   | 125 | 578.04(459.74-725.11)  | 90  | 0.14(0.02,0.27)    | -0.31(-0.38,-0.24) | 0.49(0.39,0.59)    | 0.10(0.03,0.16)    | 30  |
| Turkey                             | 741.21(608.55-890.91)   | 59  | 718.96(590.99-869.31)  | 39  | 0.02(-0.14,0.18)   | -1.65(-2.15,-1.15) | 1.88(1.64,2.12)    | -0.03(-0.23,0.18)  | 58  |
| United Arab Emirates               | 941.45(767.48-1133.68)  | 23  | 905.80(736.37-1107.77) | 21  | 0.15(-0.26,0.56)   | 1.61(-0.90,4.19)   | -2.87(-3.85,-1.88) | -0.37(-1.26,0.53)  | 111 |
| Yemen                              | 681.80(568.54-817.92)   | 77  | 608.20(485.94-750.18)  | 75  | -0.57(-0.64,-0.49) | -0.67(-0.72,-0.61) | 0.16(0.05,0.26)    | -0.37(-0.42,-0.32) | 112 |
| Afghanistan                        | 652.33(543.81-774.52)   | 87  | 631.24(521.18-764.55)  | 66  | -0.53(-0.63,-0.43) | -0.15(-0.17,-0.13) | 0.38(0.31,0.45)    | -0.10(-0.14,-0.07) | 69  |
| Bangladesh                         | 266.77(231.74-305.57)   | 202 | 207.54(178.04-243.32)  | 203 | -0.24(-0.49,0.01)  | -1.97(-2.13,-1.80) | -0.44(-0.62,-0.26) | -0.94(-1.07,-0.81) | 184 |
| Bhutan                             | 291.80(253.79-335.73)   | 200 | 215.15(185.60-252.43)  | 202 | -0.62(-0.71,-0.53) | -1.75(-1.84,-1.66) | -0.76(-0.94,-0.59) | -1.09(-1.16,-1.02) | 191 |
| India                              | 419.33(349.81-500.80)   | 179 | 356.64(294.29-428.24)  | 190 | -4.00(-4.88,-3.11) | 2.75(1.14,4.38)    | -0.55(-1.28,0.18)  | -0.65(-1.27,-0.01) | 162 |
| Nepal                              | 204.91(179.58-233.76)   | 204 | 175.47(150.18-204.47)  | 204 | -0.36(-0.51,-0.21) | -1.88(-2.22,-1.54) | 1.12(0.64,1.60)    | -0.46(-0.66,-0.25) | 130 |
| Pakistan                           | 309.23(259.17-367.14)   | 199 | 252.16(211.53-304.07)  | 200 | -0.04(-0.70,0.62)  | -1.44(-1.85,-1.03) | -0.41(-0.72,-0.10) | -0.56(-0.84,-0.28) | 146 |
| Angola                             | 682.64(561.74-825.83)   | 76  | 528.88(422.49-651.46)  | 121 | -0.40(-0.43,-0.37) | -1.46(-1.47,-1.44) | -0.74(-0.78,-0.70) | -0.88(-0.91,-0.86) | 182 |
| Central African Republic           | 650.85(540.38-785.92)   | 88  | 562.22(460.23-683.20)  | 97  | -0.47(-0.51,-0.42) | -0.60(-0.61,-0.59) | -0.44(-0.48,-0.41) | -0.51(-0.53,-0.49) | 138 |
| Congo                              | 656.84(535.27-801.11)   | 84  | 593.11(475.02-745.68)  | 81  | -0.34(-0.49,-0.18) | -0.78(-0.92,-0.64) | 0.11(-0.02,0.24)   | -0.38(-0.47,-0.28) | 113 |
| Democratic Republic of the Congo   | 550.35(446.13-670.50)   | 135 | 508.57(412.31-631.68)  | 132 | -0.56(-0.59,-0.52) | -0.31(-0.39,-0.24) | 0.09(0.03,0.15)    | -0.28(-0.31,-0.25) | 97  |
| Equatorial Guinea                  | 623.00(505.59-746.76)   | 101 | 517.61(408.71-656.97)  | 128 | -0.78(-0.85,-0.72) | -1.30(-1.42,-1.19) | 0.41(0.11,0.72)    | -0.60(-0.70,-0.49) | 155 |
| Gabon                              | 548.78(442.70-669.70)   | 138 | 478.15(375.30-606.14)  | 146 | -0.88(-0.90,-0.86) | -0.85(-0.87,-0.83) | 0.42(0.18,0.65)    | -0.46(-0.54,-0.39) | 131 |
| Burundi                            | 833.14(677.28-1020.36)  | 46  | 669.14(533.39-821.81)  | 52  | -0.83(-0.87,-0.78) | -0.74(-0.85,-0.63) | -0.69(-0.81,-0.57) | -0.77(-0.82,-0.71) | 176 |

|                             |                          |     |                         |     |                    |                    |                    |                    |     |
|-----------------------------|--------------------------|-----|-------------------------|-----|--------------------|--------------------|--------------------|--------------------|-----|
| Comoros                     | 726.91(588.06-904.17)    | 61  | 655.60(519.00-822.06)   | 56  | -0.77(-0.80,-0.74) | -0.60(-0.62,-0.59) | 0.35(0.30,0.40)    | -0.35(-0.37,-0.33) | 106 |
| Djibouti                    | 787.84(633.81-975.95)    | 50  | 661.22(529.76-835.01)   | 55  | -0.83(-0.86,-0.80) | -0.97(-1.05,-0.89) | 0.16(0.00,0.32)    | -0.58(-0.64,-0.52) | 150 |
| Eritrea                     | 763.70(622.29-936.04)    | 52  | 680.07(545.48-847.25)   | 48  | -0.57(-0.60,-0.54) | -0.82(-0.89,-0.75) | 0.25(0.12,0.39)    | -0.41(-0.46,-0.36) | 123 |
| Ethiopia                    | 611.11(489.95-764.23)    | 106 | 505.60(383.13-660.03)   | 134 | -1.12(-1.38,-0.85) | -1.09(-1.15,-1.02) | 0.47(0.28,0.66)    | -0.62(-0.72,-0.51) | 158 |
| Kenya                       | 548.20(429.89-699.47)    | 139 | 483.58(373.46-631.84)   | 144 | -0.94(-1.14,-0.73) | -0.73(-0.84,-0.62) | 0.60(0.36,0.83)    | -0.39(-0.51,-0.27) | 119 |
| Madagascar                  | 1190.13(963.54-1490.45)  | 6   | 859.32(699.05-1043.76)  | 25  | -0.53(-0.74,-0.31) | -2.02(-2.24,-1.81) | -0.79(-0.93,-0.64) | -1.18(-1.30,-1.06) | 198 |
| Malawi                      | 638.55(503.42-791.42)    | 97  | 610.65(483.48-770.87)   | 74  | -0.51(-0.60,-0.43) | -0.38(-0.41,-0.35) | 0.46(0.39,0.53)    | -0.15(-0.19,-0.11) | 77  |
| Mauritius                   | 620.04(510.55-749.52)    | 104 | 464.66(366.22-586.49)   | 154 | -0.73(-0.81,-0.65) | -1.45(-1.49,-1.41) | -0.70(-0.83,-0.58) | -1.00(-1.05,-0.95) | 186 |
| Mozambique                  | 698.04(569.80-863.33)    | 68  | 673.40(540.14-839.70)   | 50  | -0.25(-0.27,-0.23) | -0.43(-0.44,-0.42) | 0.38(0.34,0.43)    | -0.12(-0.14,-0.11) | 73  |
| Rwanda                      | 1290.82(1056.01-1592.12) | 4   | 1060.12(853.89-1311.28) | 4   | -0.72(-0.81,-0.63) | -0.48(-0.61,-0.35) | -0.83(-1.10,-0.55) | -0.70(-0.80,-0.60) | 172 |
| Seychelles                  | 407.54(326.86-511.56)    | 183 | 423.40(331.97-546.15)   | 173 | -0.22(-0.34,-0.09) | -0.03(-0.07,0.02)  | 0.78(0.65,0.90)    | 0.17(0.10,0.23)    | 23  |
| Somalia                     | 832.01(666.99-1020.99)   | 47  | 686.78(559.37-847.08)   | 47  | -0.80(-0.89,-0.72) | -1.13(-1.18,-1.08) | -0.10(-0.14,-0.06) | -0.66(-0.69,-0.62) | 166 |
| United Republic of Tanzania | 875.62(696.64-1101.24)   | 36  | 862.07(681.57-1078.99)  | 24  | -0.25(-0.35,-0.15) | 0.60(0.45,0.75)    | -0.38(-0.59,-0.16) | -0.06(-0.15,0.04)  | 62  |
| Uganda                      | 840.67(673.36-1042.16)   | 44  | 750.58(592.98-954.96)   | 35  | -0.48(-0.49,-0.47) | -0.71(-0.76,-0.67) | 0.15(0.08,0.22)    | -0.38(-0.41,-0.35) | 114 |
| Zambia                      | 421.55(339.74-519.82)    | 177 | 427.73(328.36-544.79)   | 172 | -1.36(-1.49,-1.22) | 0.02(-0.05,0.09)   | 1.67(1.01,2.34)    | 0.10(-0.11,0.31)   | 31  |
| Botswana                    | 389.48(320.00-469.11)    | 188 | 435.99(335.61-567.31)   | 168 | -0.23(-0.49,0.02)  | 0.37(-0.40,1.15)   | 0.69(0.47,0.91)    | 0.25(-0.02,0.52)   | 13  |
| Lesotho                     | 247.35(204.63-297.19)    | 203 | 247.41(206.92-295.77)   | 201 | -0.61(-0.75,-0.47) | -0.05(-0.12,0.02)  | 0.80(0.66,0.93)    | 0.04(-0.04,0.11)   | 41  |
| Namibia                     | 390.33(323.95-470.67)    | 187 | 350.99(281.11-432.65)   | 193 | -0.42(-0.50,-0.34) | -0.88(-0.92,-0.84) | 0.31(0.19,0.43)    | -0.36(-0.41,-0.30) | 110 |
| South Africa                | 668.65(487.87-866.72)    | 80  | 579.84(417.36-771.38)   | 89  | 0.73(-0.08,1.55)   | -6.75(-9.20,-4.23) | 7.06(5.87,8.27)    | 0.07(-0.92,1.06)   | 35  |
| Eswatini                    | 671.21(555.84-813.15)    | 78  | 612.82(500.88-744.23)   | 72  | 0.49(0.35,0.63)    | -0.90(-1.00,-0.80) | -0.62(-0.99,-0.25) | -0.38(-0.51,-0.25) | 115 |
| Zimbabwe                    | 318.54(262.03-386.57)    | 198 | 327.66(267.93-397.58)   | 198 | -0.66(-0.75,-0.57) | 0.05(-0.02,0.12)   | 1.04(0.95,1.14)    | 0.14(0.09,0.18)    | 25  |
| Benin                       | 515.83(419.33-635.49)    | 153 | 469.79(371.60-584.66)   | 150 | -0.76(-0.96,-0.56) | -0.48(-0.50,-0.45) | 0.37(0.28,0.45)    | -0.30(-0.37,-0.24) | 100 |
| Burkina Faso                | 444.04(353.04-554.78)    | 172 | 449.76(353.22-577.78)   | 164 | -0.34(-0.39,-0.28) | -0.04(-0.30,0.22)  | 0.57(0.46,0.67)    | 0.04(-0.06,0.13)   | 42  |
| Cameroon                    | 441.21(361.67-546.31)    | 173 | 412.72(325.55-523.00)   | 178 | -1.21(-1.26,-1.16) | 0.01(-0.09,0.12)   | 0.62(0.53,0.72)    | -0.23(-0.28,-0.18) | 87  |
| Cabo Verde                  | 479.70(383.02-595.11)    | 163 | 435.21(333.47-566.85)   | 169 | -1.42(-1.45,-1.39) | -0.43(-0.46,-0.40) | 1.00(0.90,1.11)    | -0.30(-0.34,-0.26) | 101 |
| Chad                        | 400.98(323.68-495.27)    | 185 | 391.06(311.45-492.20)   | 181 | -0.85(-1.07,-0.62) | 0.00(-0.03,0.03)   | 0.60(0.50,0.70)    | -0.08(-0.16,0.00)  | 66  |
| Cote d'Ivoire               | 529.01(430.54-659.13)    | 145 | 514.61(403.90-648.43)   | 129 | 0.02(-0.22,0.26)   | -0.52(-0.63,-0.41) | 0.28(0.04,0.51)    | -0.07(-0.20,0.06)  | 65  |
| Gambia                      | 506.64(409.79-622.85)    | 154 | 470.42(370.74-584.81)   | 149 | -0.96(-1.09,-0.84) | -0.27(-0.30,-0.23) | 0.61(0.52,0.70)    | -0.25(-0.30,-0.19) | 91  |
| Ghana                       | 363.35(286.51-462.48)    | 194 | 380.29(295.37-485.33)   | 185 | -0.33(-0.40,-0.27) | -0.05(-0.08,-0.02) | 1.00(0.89,1.10)    | 0.19(0.15,0.23)    | 22  |
| Guinea                      | 574.00(466.95-719.75)    | 121 | 546.83(441.45-689.13)   | 105 | -0.04(-0.14,0.06)  | -0.74(-0.79,-0.69) | 0.35(0.23,0.47)    | -0.18(-0.24,-0.13) | 83  |
| Guinea-Bissau               | 568.27(463.73-687.48)    | 123 | 496.25(400.43-610.59)   | 138 | -0.89(-0.98,-0.79) | -0.67(-0.71,-0.63) | 0.22(0.13,0.31)    | -0.47(-0.52,-0.43) | 132 |
| Liberia                     | 479.29(380.36-608.83)    | 164 | 420.78(325.63-541.06)   | 175 | -0.84(-1.27,-0.41) | -0.81(-0.89,-0.72) | 0.46(0.23,0.69)    | -0.43(-0.58,-0.27) | 127 |
| Mali                        | 370.62(305.49-462.29)    | 192 | 383.30(308.95-479.04)   | 184 | -0.63(-0.75,-0.51) | 0.17(0.00,0.34)    | 0.96(0.78,1.14)    | 0.16(0.07,0.26)    | 24  |
| Mauritania                  | 736.41(591.18-924.79)    | 60  | 679.73(541.58-858.93)   | 49  | -0.40(-0.50,-0.31) | -0.64(-0.71,-0.57) | 0.21(0.13,0.28)    | -0.31(-0.36,-0.26) | 102 |
| Niger                       | 552.89(447.71-682.14)    | 133 | 467.77(370.98-589.81)   | 153 | -0.87(-0.95,-0.79) | -0.78(-0.81,-0.76) | 0.04(-0.02,0.10)   | -0.58(-0.61,-0.54) | 151 |
| Nigeria                     | 709.77(570.17-885.26)    | 66  | 591.93(467.20-756.46)   | 82  | -1.12(-1.73,-0.50) | -0.62(-0.71,-0.52) | -0.20(-0.80,0.41)  | -0.64(-0.92,-0.37) | 161 |
| Sao Tome and Principe       | 719.37(589.67-874.30)    | 64  | 623.18(508.70-753.49)   | 68  | 0.27(0.14,0.40)    | -1.39(-1.50,-1.28) | -0.37(-0.71,-0.03) | -0.54(-0.66,-0.42) | 143 |
| Senegal                     | 421.09(343.40-522.90)    | 178 | 403.64(319.38-513.24)   | 179 | -0.99(-1.03,-0.94) | -0.29(-0.36,-0.23) | 1.01(0.86,1.16)    | -0.13(-0.18,-0.07) | 75  |

|                              |                          |     |                         |     |                    |                    |                    |                    |     |
|------------------------------|--------------------------|-----|-------------------------|-----|--------------------|--------------------|--------------------|--------------------|-----|
| Sierra Leone                 | 523.80(418.29-647.57)    | 149 | 472.48(374.62-595.83)   | 147 | -0.95(-1.07,-0.84) | -0.47(-0.89,-0.06) | 0.33(0.17,0.50)    | -0.42(-0.57,-0.27) | 126 |
| Togo                         | 611.68(493.18-755.81)    | 105 | 567.43(451.61-719.46)   | 94  | -0.37(-0.50,-0.24) | -0.63(-0.74,-0.52) | 0.32(0.22,0.43)    | -0.26(-0.33,-0.18) | 92  |
| American Samoa               | 579.93(458.92-737.80)    | 120 | 568.90(421.19-728.73)   | 93  | -2.27(-3.04,-1.50) | 0.35(0.01,0.69)    | 2.13(1.21,3.07)    | 0.07(-0.36,0.50)   | 36  |
| Bermuda                      | 894.72(684.57-1158.18)   | 30  | 944.01(709.69-1216.77)  | 12  | 0.22(0.18,0.27)    | 0.22(0.18,0.27)    | 0.35(-0.30,1.00)   | 0.24(0.03,0.45)    | 14  |
| Cook Islands                 | 639.21(489.11-822.40)    | 94  | 598.48(449.36-767.93)   | 79  | -1.94(-2.41,-1.46) | 0.08(-0.07,0.24)   | 1.37(1.02,1.72)    | -0.14(-0.34,0.07)  | 76  |
| Greenland                    | 1352.09(1083.75-1687.09) | 2   | 1017.29(827.76-1276.14) | 8   | -0.22(-0.40,-0.03) | -2.01(-2.23,-1.79) | -0.72(-0.76,-0.67) | -1.01(-1.11,-0.91) | 188 |
| Guam                         | 641.12(487.08-834.26)    | 93  | 570.24(425.28-746.41)   | 92  | -1.11(-1.52,-0.70) | -0.78(-0.91,-0.64) | 0.99(0.66,1.33)    | -0.32(-0.51,-0.13) | 103 |
| Monaco                       | 497.35(389.21-632.62)    | 156 | 486.73(373.13-614.41)   | 140 | -0.29(-0.33,-0.26) | -0.07(-0.12,-0.01) | 0.17(0.12,0.22)    | -0.06(-0.09,-0.03) | 63  |
| Nauru                        | 561.54(453.48-688.41)    | 127 | 548.55(421.32-712.77)   | 103 | -1.06(-1.14,-0.98) | -1.06(-1.14,-0.98) | 2.46(0.68,4.27)    | 0.02(-0.52,0.57)   | 46  |
| Niue                         | 586.61(457.59-755.67)    | 115 | 583.21(438.72-746.59)   | 87  | -2.22(-2.40,-2.04) | 0.23(0.19,0.28)    | 2.02(1.43,2.60)    | 0.01(-0.18,0.20)   | 49  |
| Northern Mariana Islands     | 648.41(505.83-829.56)    | 89  | 594.53(451.47-780.45)   | 80  | -1.84(-2.16,-1.52) | 0.22(0.04,0.40)    | 1.06(0.67,1.45)    | -0.18(-0.37,0.01)  | 84  |
| Palau                        | 637.71(507.42-784.60)    | 98  | 557.94(435.94-704.38)   | 98  | -0.97(-1.39,-0.56) | -0.91(-1.05,-0.77) | 0.73(0.45,1.02)    | -0.40(-0.57,-0.22) | 120 |
| Puerto Rico                  | 1302.91(1019.27-1618.45) | 3   | 1207.00(942.25-1538.98) | 2   | 0.15(0.06,0.23)    | -0.46(-0.57,-0.34) | -0.39(-0.70,-0.07) | -0.23(-0.34,-0.12) | 88  |
| Saint Kitts and Nevis        | 924.44(712.93-1179.12)   | 24  | 927.17(704.46-1207.11)  | 13  | -0.17(-0.18,-0.15) | -0.17(-0.18,-0.15) | 0.43(0.20,0.66)    | 0.02(-0.05,0.09)   | 47  |
| San Marino                   | 482.99(379.61-607.39)    | 160 | 479.17(369.03-607.09)   | 145 | -0.25(-0.27,-0.23) | -0.03(-0.04,-0.02) | 0.23(0.13,0.33)    | -0.02(-0.05,0.02)  | 55  |
| Tokelau                      | 565.33(421.44-742.41)    | 124 | 580.07(431.65-744.16)   | 88  | -2.34(-2.85,-1.82) | 0.85(0.70,1.01)    | 2.18(1.71,2.64)    | 0.23(-0.01,0.46)   | 17  |
| Tuvalu                       | 520.11(422.40-631.83)    | 151 | 573.64(425.97-734.65)   | 91  | -1.00(-1.07,-0.93) | -1.00(-1.07,-0.93) | 3.80(2.24,5.38)    | 0.46(-0.01,0.94)   | 6   |
| United States Virgin Islands | 824.35(642.07-1074.49)   | 48  | 879.43(672.99-1142.58)  | 23  | -0.03(-0.07,0.01)  | 0.16(0.15,0.18)    | 0.59(0.44,0.75)    | 0.24(0.19,0.29)    | 15  |
| South Sudan                  | 747.36(604.04-920.61)    | 58  | 650.92(520.64-815.58)   | 58  | -0.79(-0.84,-0.75) | -0.79(-0.84,-0.75) | 0.33(0.03,0.62)    | -0.43(-0.54,-0.33) | 128 |
| Sudan                        | 647.33(518.05-795.29)    | 90  | 635.68(508.20-803.78)   | 65  | -0.09(-0.12,-0.07) | -0.50(-0.56,-0.44) | 0.51(0.40,0.63)    | -0.06(-0.10,-0.01) | 64  |

***Inflammatory bowel disease***

|                                       |                 |     |                 |     |                 |                   |                 |                 |     |
|---------------------------------------|-----------------|-----|-----------------|-----|-----------------|-------------------|-----------------|-----------------|-----|
| China                                 | 1.47(1.24-1.74) | 123 | 3.01(2.59-3.50) | 81  | 3.26(2.95,3.58) | 1.77(1.43,2.11)   | 2.15(2.08,2.22) | 2.48(2.33,2.64) | 4   |
| Democratic People's Republic of Korea | 0.96(0.80-1.15) | 153 | 1.29(1.08-1.53) | 138 | 1.47(0.71,2.24) | 0.78(0.74,0.82)   | 0.78(0.74,0.82) | 0.99(0.76,1.23) | 53  |
| Taiwan (Province of China)            | 0.71(0.62-0.81) | 173 | 1.72(1.54-1.93) | 125 | 0.81(0.22,1.42) | 6.92(5.39,8.47)   | 2.34(2.04,2.64) | 3.20(2.68,3.73) | 1   |
| Cambodia                              | 0.37(0.30-0.45) | 201 | 0.49(0.40-0.59) | 203 | 0.77(0.69,0.86) | 1.33(1.28,1.39)   | 0.61(0.49,0.73) | 0.92(0.86,0.97) | 61  |
| Indonesia                             | 0.43(0.36-0.52) | 197 | 0.55(0.46-0.66) | 198 | 1.58(1.35,1.82) | 0.45(0.33,0.56)   | 0.68(0.64,0.73) | 0.87(0.79,0.96) | 70  |
| Lao People's Democratic Republic      | 0.37(0.30-0.46) | 200 | 0.51(0.42-0.63) | 202 | 0.82(0.79,0.84) | 0.88(0.79,0.98)   | 1.51(1.38,1.63) | 1.06(1.00,1.11) | 40  |
| Malaysia                              | 0.46(0.39-0.52) | 193 | 0.76(0.67-0.85) | 177 | 3.03(2.97,3.09) | 1.05(0.99,1.11)   | 1.39(1.36,1.42) | 1.77(1.74,1.80) | 13  |
| Maldives                              | 0.34(0.28-0.41) | 203 | 0.51(0.43-0.61) | 201 | 2.16(2.08,2.25) | 0.77(0.70,0.84)   | 1.34(1.13,1.55) | 1.38(1.30,1.45) | 22  |
| Myanmar                               | 0.40(0.32-0.49) | 199 | 0.55(0.46-0.68) | 197 | 0.65(0.62,0.68) | 1.25(1.23,1.28)   | 1.54(1.48,1.60) | 1.15(1.13,1.18) | 34  |
| Philippines                           | 0.48(0.39-0.58) | 188 | 0.63(0.52-0.76) | 190 | 1.37(1.17,1.57) | -0.05(-0.16,0.05) | 1.64(1.54,1.74) | 0.97(0.89,1.05) | 54  |
| Sri Lanka                             | 0.67(0.56-0.81) | 174 | 1.15(1.02-1.30) | 152 | 3.86(3.63,4.09) | 0.83(0.78,0.89)   | 1.36(1.30,1.43) | 1.93(1.85,2.00) | 10  |
| Thailand                              | 0.33(0.26-0.41) | 204 | 0.46(0.38-0.56) | 204 | 1.81(1.63,1.99) | 0.52(0.48,0.57)   | 1.32(1.28,1.36) | 1.20(1.14,1.25) | 30  |
| Timor-Leste                           | 0.36(0.29-0.45) | 202 | 0.51(0.42-0.62) | 200 | 0.33(0.28,0.38) | 2.20(2.11,2.30)   | 1.18(1.07,1.28) | 1.23(1.18,1.29) | 28  |
| Viet Nam                              | 0.66(0.53-0.82) | 175 | 1.37(1.11-1.70) | 133 | 5.86(5.48,6.25) | 1.10(0.78,1.41)   | 0.82(0.77,0.88) | 2.49(2.30,2.68) | 3   |
| Fiji                                  | 0.54(0.44-0.64) | 180 | 0.72(0.61-0.86) | 182 | 0.58(0.56,0.60) | 1.12(1.03,1.22)   | 1.20(1.05,1.35) | 1.00(0.94,1.06) | 50  |
| Kiribati                              | 0.48(0.40-0.58) | 187 | 0.58(0.48-0.70) | 195 | 0.20(0.16,0.23) | 0.61(0.45,0.76)   | 0.92(0.72,1.12) | 0.59(0.50,0.68) | 110 |
| Marshall Islands                      | 0.46(0.38-0.55) | 190 | 0.63(0.53-0.76) | 189 | 0.52(0.49,0.55) | 1.30(1.22,1.37)   | 1.30(1.23,1.37) | 1.06(1.02,1.10) | 41  |

|                                  |                    |     |                    |     |                    |                    |                    |                    |     |
|----------------------------------|--------------------|-----|--------------------|-----|--------------------|--------------------|--------------------|--------------------|-----|
| Micronesia (Federated States of) | 0.49(0.41-0.59)    | 183 | 0.67(0.56-0.81)    | 184 | 0.57(0.51,0.62)    | 1.37(1.27,1.47)    | 1.07(0.97,1.18)    | 1.02(0.97,1.08)    | 45  |
| Papua New Guinea                 | 0.40(0.33-0.48)    | 198 | 0.52(0.44-0.64)    | 199 | 0.40(0.33,0.47)    | 0.95(0.84,1.06)    | 1.27(1.18,1.35)    | 0.88(0.83,0.94)    | 67  |
| Samoa                            | 0.46(0.38-0.55)    | 192 | 0.60(0.51-0.73)    | 192 | -0.60(-0.74,-0.45) | 1.23(1.05,1.40)    | 1.96(1.50,2.42)    | 0.90(0.71,1.09)    | 63  |
| Solomon Islands                  | 0.43(0.36-0.52)    | 196 | 0.56(0.46-0.68)    | 196 | 0.60(0.57,0.64)    | 0.86(0.76,0.95)    | 0.98(0.94,1.02)    | 0.86(0.82,0.90)    | 72  |
| Tonga                            | 0.45(0.38-0.53)    | 195 | 0.66(0.55-0.78)    | 185 | 0.85(0.74,0.97)    | 1.46(1.33,1.59)    | 1.48(1.40,1.55)    | 1.32(1.25,1.39)    | 26  |
| Vanuatu                          | 0.45(0.37-0.55)    | 194 | 0.59(0.49-0.71)    | 194 | 0.45(0.41,0.49)    | 1.14(0.98,1.29)    | 1.10(1.01,1.19)    | 0.94(0.86,1.01)    | 57  |
| Armenia                          | 5.48(4.60-6.46)    | 53  | 6.64(5.62-7.95)    | 53  | 0.73(0.67,0.79)    | 0.92(0.90,0.95)    | 0.27(0.14,0.40)    | 0.66(0.62,0.71)    | 97  |
| Azerbaijan                       | 6.74(5.74-7.97)    | 41  | 7.01(5.92-8.40)    | 49  | -0.02(-0.09,0.05)  | 0.34(0.30,0.38)    | 0.08(-0.06,0.23)   | 0.14(0.09,0.20)    | 168 |
| Georgia                          | 6.48(5.54-7.62)    | 42  | 6.32(5.38-7.44)    | 56  | -0.19(-0.29,-0.10) | 0.03(-0.20,0.26)   | -0.16(-0.46,0.13)  | -0.13(-0.25,0.00)  | 188 |
| Kazakhstan                       | 6.01(5.11-7.11)    | 47  | 7.20(6.14-8.56)    | 46  | 0.89(0.77,1.00)    | -0.48(-0.59,-0.37) | 1.48(1.01,1.96)    | 0.60(0.44,0.75)    | 108 |
| Kyrgyzstan                       | 6.03(5.14-7.11)    | 46  | 6.39(5.41-7.54)    | 55  | 0.47(0.38,0.55)    | 0.06(0.02,0.11)    | -0.14(-0.20,-0.07) | 0.13(0.08,0.18)    | 171 |
| Mongolia                         | 6.23(5.27-7.49)    | 44  | 7.35(6.20-8.69)    | 43  | 0.50(0.43,0.58)    | 0.73(0.37,1.09)    | 0.34(0.21,0.46)    | 0.52(0.40,0.65)    | 119 |
| Tajikistan                       | 5.83(4.91-6.93)    | 49  | 6.23(5.32-7.30)    | 57  | -0.22(-0.69,0.26)  | 0.60(-0.22,1.44)   | 0.22(0.12,0.32)    | 0.16(-0.15,0.47)   | 165 |
| Turkmenistan                     | 6.75(5.73-7.99)    | 40  | 7.68(6.53-9.05)    | 42  | -0.17(-0.21,-0.12) | 1.18(0.97,1.39)    | 0.46(0.36,0.55)    | 0.45(0.38,0.52)    | 127 |
| Uzbekistan                       | 5.44(4.62-6.45)    | 54  | 6.90(5.90-8.20)    | 51  | 0.42(0.10,0.74)    | 1.06(0.63,1.49)    | 1.02(0.83,1.21)    | 0.87(0.69,1.06)    | 71  |
| Albania                          | 7.94(6.78-9.31)    | 35  | 9.48(8.09-11.13)   | 30  | 0.46(0.37,0.55)    | 1.37(1.32,1.42)    | 0.10(0.07,0.14)    | 0.60(0.57,0.64)    | 109 |
| Bosnia and Herzegovina           | 7.18(6.30-8.17)    | 39  | 9.26(8.25-10.53)   | 33  | 0.96(0.81,1.11)    | 1.17(1.00,1.34)    | 0.38(0.33,0.43)    | 0.89(0.81,0.97)    | 65  |
| Bulgaria                         | 7.80(6.60-9.14)    | 37  | 10.34(8.83-12.16)  | 26  | 2.98(2.94,3.02)    | 0.09(0.00,0.18)    | 0.05(0.03,0.07)    | 0.97(0.92,1.02)    | 55  |
| Croatia                          | 10.11(9.48-10.76)  | 24  | 13.09(12.06-14.21) | 22  | 0.83(0.59,1.07)    | 0.81(0.76,0.87)    | 1.01(0.76,1.27)    | 0.90(0.79,1.02)    | 64  |
| Czechia                          | 4.86(4.13-5.83)    | 57  | 9.26(8.60-9.97)    | 34  | 2.50(2.01,2.99)    | 1.14(1.06,1.23)    | 3.22(2.39,4.07)    | 2.21(1.90,2.51)    | 5   |
| Hungary                          | 11.99(11.06-12.81) | 16  | 21.55(20.45-22.74) | 10  | 3.26(2.87,3.66)    | 2.31(2.14,2.49)    | 0.35(0.18,0.52)    | 2.04(1.88,2.19)    | 7   |
| North Macedonia                  | 9.30(7.93-10.90)   | 28  | 9.96(8.49-11.66)   | 27  | 0.17(0.14,0.20)    | 0.70(0.68,0.72)    | -0.28(-0.34,-0.21) | 0.23(0.21,0.26)    | 156 |
| Montenegro                       | 9.07(7.74-10.58)   | 29  | 9.46(8.02-11.15)   | 31  | -0.68(-0.82,-0.55) | 0.80(0.70,0.89)    | 0.41(0.37,0.46)    | 0.17(0.11,0.22)    | 163 |
| Poland                           | 33.98(28.90-39.68) | 3   | 13.28(11.82-14.95) | 21  | -5.42(-5.66,-5.18) | -2.76(-2.99,-2.52) | -0.54(-0.58,-0.50) | -3.26(-3.38,-3.14) | 204 |
| Romania                          | 5.24(4.44-6.18)    | 55  | 5.63(5.11-6.27)    | 61  | -1.96(-2.14,-1.77) | 0.95(0.90,1.00)    | 1.61(1.41,1.82)    | 0.24(0.15,0.33)    | 152 |
| Serbia                           | 8.89(7.60-10.37)   | 30  | 12.68(10.96-14.68) | 23  | 3.25(2.84,3.66)    | 0.28(0.24,0.33)    | 0.19(0.15,0.22)    | 1.19(1.06,1.32)    | 31  |
| Slovakia                         | 10.35(9.18-11.58)  | 23  | 9.70(8.69-10.81)   | 28  | 0.09(-0.09,0.27)   | -0.22(-0.29,-0.14) | -0.58(-0.88,-0.28) | -0.24(-0.36,-0.12) | 192 |
| Slovenia                         | 10.77(9.39-12.53)  | 21  | 12.39(10.96-14.10) | 24  | 1.03(0.99,1.06)    | 0.46(0.44,0.48)    | -0.03(-0.05,-0.01) | 0.49(0.47,0.50)    | 125 |
| Belarus                          | 4.51(3.86-5.30)    | 58  | 5.71(4.86-6.75)    | 60  | 1.10(0.97,1.22)    | 0.34(0.26,0.42)    | 1.04(0.70,1.38)    | 0.79(0.67,0.91)    | 80  |
| Estonia                          | 3.68(3.26-4.16)    | 65  | 6.82(6.04-7.64)    | 52  | 3.31(3.13,3.50)    | 1.17(1.12,1.22)    | 2.14(1.69,2.59)    | 2.13(1.98,2.28)    | 6   |
| Latvia                           | 5.56(4.79-6.41)    | 51  | 7.15(6.25-8.09)    | 47  | 2.64(2.45,2.83)    | 0.09(-0.03,0.21)   | -0.03(-0.17,0.11)  | 0.85(0.75,0.94)    | 73  |
| Lithuania                        | 5.92(5.20-6.73)    | 48  | 8.26(7.85-8.65)    | 38  | 1.54(1.46,1.62)    | 0.99(0.98,1.01)    | 0.90(0.84,0.97)    | 1.18(1.14,1.21)    | 33  |
| Republic of Moldova              | 4.41(3.71-5.26)    | 59  | 4.51(4.16-4.86)    | 65  | -1.62(-1.71,-1.54) | 0.94(0.93,0.95)    | 0.94(0.93,0.95)    | 0.09(0.06,0.12)    | 174 |
| Russian Federation               | 7.96(6.86-9.34)    | 33  | 7.86(6.75-9.25)    | 41  | 0.54(0.34,0.74)    | -0.30(-0.49,-0.11) | -0.50(-0.55,-0.45) | -0.06(-0.16,0.03)  | 185 |
| Ukraine                          | 5.64(4.78-6.68)    | 50  | 6.22(5.33-7.29)    | 58  | 0.67(0.60,0.74)    | 0.28(0.23,0.33)    | 0.12(-0.03,0.27)   | 0.35(0.30,0.41)    | 139 |
| Brunei Darussalam                | 4.95(4.11-5.97)    | 56  | 5.09(4.17-6.09)    | 64  | -0.03(-0.05,-0.01) | 0.09(0.02,0.15)    | 0.22(0.20,0.24)    | 0.08(0.06,0.11)    | 175 |
| Japan                            | 11.22(9.49-13.32)  | 18  | 19.65(16.87-22.71) | 12  | 4.87(4.12,5.63)    | 0.54(0.27,0.82)    | 0.93(0.81,1.05)    | 1.98(1.72,2.25)    | 8   |
| Republic of Korea                | 3.37(2.96-3.78)    | 70  | 7.33(7.03-7.63)    | 44  | 6.21(5.62,6.82)    | 1.16(1.14,1.18)    | 1.16(1.14,1.18)    | 2.73(2.55,2.91)    | 2   |

|                          |                    |     |                    |     |                    |                    |                    |                    |     |
|--------------------------|--------------------|-----|--------------------|-----|--------------------|--------------------|--------------------|--------------------|-----|
| Singapore                | 3.47(2.87-4.13)    | 68  | 3.21(2.68-3.90)    | 76  | -1.09(-1.47,-0.72) | 0.40(0.20,0.60)    | 0.01(-0.23,0.24)   | -0.30(-0.48,-0.13) | 193 |
| Australia                | 12.09(10.32-14.31) | 15  | 19.62(17.36-22.17) | 13  | 4.41(4.09,4.74)    | 0.50(0.49,0.52)    | 0.50(0.49,0.52)    | 1.70(1.60,1.80)    | 16  |
| New Zealand              | 21.00(18.17-24.03) | 7   | 22.45(19.83-25.48) | 8   | 0.26(0.21,0.31)    | 0.24(0.23,0.26)    | 0.17(0.10,0.23)    | 0.23(0.20,0.26)    | 157 |
| Andorra                  | 8.55(7.26-10.05)   | 31  | 9.18(7.75-10.83)   | 35  | 1.06(0.94,1.18)    | -0.23(-0.26,-0.19) | -0.13(-0.22,-0.05) | 0.26(0.21,0.31)    | 149 |
| Austria                  | 19.15(17.10-21.06) | 10  | 20.81(18.80-23.22) | 11  | 0.92(0.57,1.28)    | 1.10(0.35,1.86)    | -0.88(-1.11,-0.65) | 0.34(0.07,0.61)    | 140 |
| Belgium                  | 7.69(7.28-8.13)    | 38  | 13.40(11.65-15.72) | 20  | 1.06(1.01,1.10)    | 0.48(0.46,0.50)    | 4.67(4.46,4.89)    | 1.94(1.88,2.01)    | 9   |
| Cyprus                   | 3.97(3.44-4.65)    | 63  | 6.07(5.48-6.74)    | 59  | 3.45(3.30,3.60)    | 0.78(0.63,0.94)    | 0.12(0.01,0.22)    | 1.41(1.32,1.49)    | 20  |
| Denmark                  | 24.36(22.66-26.11) | 5   | 21.82(20.43-23.28) | 9   | -1.16(-1.31,-1.01) | 0.35(0.30,0.40)    | -0.36(-0.64,-0.08) | -0.34(-0.44,-0.24) | 195 |
| Finland                  | 14.91(14.34-15.46) | 13  | 24.74(22.08-27.29) | 4   | 0.65(0.59,0.71)    | 1.43(1.25,1.60)    | 3.32(3.05,3.60)    | 1.76(1.65,1.87)    | 14  |
| France                   | 11.23(10.86-11.58) | 17  | 13.45(12.64-14.08) | 19  | 0.53(0.51,0.55)    | 0.53(0.51,0.55)    | 0.82(0.37,1.26)    | 0.62(0.48,0.76)    | 106 |
| Germany                  | 10.77(9.41-12.38)  | 22  | 18.37(16.07-20.92) | 14  | 4.17(3.75,4.60)    | 0.57(0.46,0.69)    | 1.01(0.63,1.39)    | 1.84(1.65,2.04)    | 11  |
| Greece                   | 7.88(6.77-9.03)    | 36  | 7.95(7.36-8.56)    | 40  | -0.09(-0.19,0.01)  | -0.30(-0.59,-0.01) | 0.57(0.48,0.66)    | 0.00(-0.11,0.10)   | 179 |
| Iceland                  | 11.18(9.58-13.00)  | 19  | 17.01(14.81-19.23) | 16  | 4.12(3.87,4.38)    | 0.37(0.33,0.41)    | 0.02(-0.01,0.06)   | 1.41(1.33,1.49)    | 21  |
| Ireland                  | 9.71(8.23-11.39)   | 26  | 8.17(7.14-9.44)    | 39  | -0.57(-0.87,-0.28) | -1.89(-2.19,-1.60) | 0.52(0.45,0.59)    | -0.59(-0.73,-0.45) | 199 |
| Israel                   | 6.25(5.41-7.22)    | 43  | 7.07(6.48-7.84)    | 48  | 1.64(1.41,1.86)    | -1.05(-1.19,-0.90) | 0.45(0.38,0.52)    | 0.44(0.35,0.53)    | 128 |
| Italy                    | 18.93(16.56-21.54) | 11  | 18.16(16.07-20.44) | 15  | -0.95(-1.19,-0.71) | 1.19(0.94,1.45)    | -0.72(-0.90,-0.55) | -0.06(-0.20,0.07)  | 186 |
| Luxembourg               | 18.82(16.34-21.72) | 12  | 15.55(13.60-17.92) | 17  | -1.38(-1.61,-1.15) | -0.17(-0.22,-0.12) | -0.33(-0.60,-0.05) | -0.63(-0.75,-0.52) | 200 |
| Malta                    | 7.94(6.81-9.40)    | 34  | 8.92(7.75-10.47)   | 37  | 1.09(0.84,1.35)    | 0.08(0.04,0.12)    | 0.08(0.04,0.12)    | 0.42(0.33,0.50)    | 132 |
| Netherlands              | 13.19(12.55-13.87) | 14  | 7.21(6.24-8.42)    | 45  | 0.62(0.59,0.65)    | -0.52(-0.63,-0.41) | -6.52(-7.07,-5.98) | -2.12(-2.30,-1.93) | 203 |
| Norway                   | 28.71(24.47-33.64) | 4   | 36.64(31.66-42.06) | 2   | 1.22(1.05,1.40)    | 1.27(1.13,1.41)    | -0.08(-0.19,0.03)  | 0.83(0.74,0.91)    | 77  |
| Portugal                 | 5.49(4.82-6.34)    | 52  | 9.37(8.55-10.26)   | 32  | 4.36(4.09,4.64)    | 0.79(0.75,0.84)    | 0.38(0.20,0.57)    | 1.83(1.72,1.93)    | 12  |
| Spain                    | 10.01(9.64-10.37)  | 25  | 14.01(13.46-14.57) | 18  | 1.83(1.72,1.94)    | 0.72(0.68,0.76)    | 1.03(0.88,1.19)    | 1.14(1.08,1.21)    | 35  |
| Sweden                   | 23.51(20.53-26.98) | 6   | 27.26(23.97-31.28) | 3   | 0.60(0.54,0.66)    | 0.80(0.54,1.05)    | 0.16(-0.24,0.56)   | 0.54(0.38,0.71)    | 114 |
| Switzerland              | 10.95(9.68-12.50)  | 20  | 11.45(10.20-12.96) | 25  | 1.12(1.01,1.23)    | -0.19(-0.25,-0.13) | -0.37(-0.44,-0.30) | 0.16(0.11,0.21)    | 166 |
| United Kingdom           | 19.93(17.45-22.89) | 8   | 23.11(20.33-26.28) | 7   | 0.94(0.80,1.07)    | 0.55(0.51,0.59)    | 0.01(-0.04,0.06)   | 0.50(0.46,0.55)    | 122 |
| Argentina                | 1.63(1.36-1.94)    | 121 | 1.73(1.44-2.03)    | 124 | 0.39(0.30,0.47)    | -0.05(-0.08,-0.01) | 0.25(0.23,0.28)    | 0.19(0.16,0.22)    | 159 |
| Chile                    | 2.37(2.03-2.73)    | 85  | 2.44(2.10-2.81)    | 104 | 1.61(1.40,1.81)    | 0.68(0.63,0.73)    | -1.87(-2.13,-1.61) | 0.13(0.01,0.24)    | 172 |
| Uruguay                  | 1.30(1.09-1.56)    | 127 | 1.76(1.47-2.09)    | 123 | 1.79(1.61,1.98)    | 0.62(0.57,0.66)    | 0.79(0.36,1.21)    | 1.03(0.89,1.18)    | 44  |
| Canada                   | 37.90(36.81-38.96) | 1   | 36.97(35.65-38.27) | 1   | 0.26(0.16,0.35)    | 0.89(0.86,0.93)    | -1.54(-1.77,-1.30) | -0.06(-0.15,0.02)  | 187 |
| United States of America | 34.58(29.79-40.26) | 2   | 23.19(21.18-25.62) | 6   | -5.26(-5.84,-4.68) | 0.60(0.46,0.74)    | 0.17(0.07,0.27)    | -1.40(-1.60,-1.20) | 202 |
| Antigua and Barbuda      | 2.05(1.74-2.46)    | 107 | 2.60(2.21-3.13)    | 98  | 1.55(1.21,1.89)    | -0.56(-0.64,-0.48) | 1.76(1.67,1.86)    | 0.81(0.70,0.92)    | 78  |
| Bahamas                  | 2.21(1.88-2.62)    | 100 | 3.25(2.71-3.92)    | 74  | 1.64(1.51,1.76)    | 0.22(-0.12,0.56)   | 2.30(2.14,2.45)    | 1.38(1.24,1.52)    | 23  |
| Barbados                 | 4.26(3.60-5.10)    | 61  | 5.13(4.39-6.10)    | 63  | 1.64(1.53,1.74)    | -1.00(-1.28,-0.71) | 1.45(1.32,1.58)    | 0.68(0.56,0.80)    | 95  |
| Belize                   | 2.09(1.77-2.52)    | 106 | 2.70(2.26-3.27)    | 94  | 1.69(1.53,1.85)    | -0.30(-0.36,-0.24) | 1.55(1.48,1.62)    | 0.89(0.83,0.94)    | 66  |
| Cuba                     | 2.11(1.79-2.55)    | 104 | 2.53(2.12-3.02)    | 101 | 1.29(1.12,1.47)    | -1.06(-1.15,-0.97) | 1.76(1.67,1.85)    | 0.64(0.57,0.72)    | 100 |
| Dominica                 | 2.05(1.73-2.44)    | 108 | 3.02(2.54-3.62)    | 80  | 3.03(2.93,3.12)    | 0.33(0.13,0.54)    | 0.94(0.84,1.04)    | 1.36(1.27,1.46)    | 24  |
| Dominican Republic       | 2.01(1.68-2.40)    | 109 | 2.68(2.25-3.25)    | 95  | 1.65(1.40,1.89)    | -0.08(-0.15,-0.01) | 1.67(1.58,1.76)    | 1.00(0.91,1.08)    | 51  |
| Grenada                  | 2.24(1.86-2.68)    | 96  | 2.98(2.48-3.61)    | 82  | 1.96(1.88,2.04)    | -0.35(-0.56,-0.13) | 1.56(1.47,1.66)    | 1.02(0.94,1.10)    | 46  |

|                                    |                 |     |                 |     |                    |                    |                    |                    |     |
|------------------------------------|-----------------|-----|-----------------|-----|--------------------|--------------------|--------------------|--------------------|-----|
| Guyana                             | 2.28(1.91-2.74) | 91  | 2.87(2.41-3.44) | 88  | 1.61(1.45,1.78)    | -0.97(-1.06,-0.89) | 1.81(1.73,1.90)    | 0.79(0.72,0.86)    | 81  |
| Haiti                              | 1.95(1.63-2.34) | 111 | 2.42(2.03-2.97) | 105 | 1.56(1.41,1.71)    | -0.81(-0.88,-0.74) | 1.59(1.51,1.66)    | 0.76(0.70,0.82)    | 86  |
| Jamaica                            | 1.90(1.60-2.26) | 113 | 2.50(2.11-2.99) | 102 | 1.22(0.84,1.60)    | -0.31(-0.53,-0.10) | 2.30(2.06,2.54)    | 1.02(0.84,1.19)    | 47  |
| Saint Lucia                        | 2.25(1.88-2.70) | 94  | 2.64(2.22-3.19) | 97  | 1.12(0.83,1.41)    | -0.99(-1.15,-0.84) | 1.67(1.51,1.84)    | 0.56(0.44,0.69)    | 112 |
| Saint Vincent and the Grenadines   | 2.11(1.78-2.54) | 105 | 2.80(2.35-3.35) | 89  | 2.60(2.49,2.72)    | -0.96(-1.02,-0.90) | 1.34(1.28,1.40)    | 0.95(0.90,1.00)    | 56  |
| Suriname                           | 2.22(1.86-2.66) | 99  | 2.76(2.31-3.34) | 91  | 1.31(1.21,1.42)    | -0.65(-0.71,-0.60) | 1.68(1.62,1.74)    | 0.76(0.72,0.80)    | 87  |
| Trinidad and Tobago                | 2.51(2.10-3.01) | 80  | 3.19(2.68-3.86) | 77  | 2.28(2.23,2.34)    | -0.92(-1.02,-0.82) | 1.47(1.42,1.52)    | 0.80(0.75,0.84)    | 79  |
| Bolivia (Plurinational State of)   | 1.71(1.48-2.04) | 116 | 1.85(1.58-2.23) | 121 | 1.17(1.07,1.27)    | -1.70(-1.86,-1.54) | 1.33(1.04,1.62)    | 0.29(0.16,0.41)    | 144 |
| Ecuador                            | 1.55(1.37-1.77) | 122 | 1.89(1.67-2.13) | 119 | 3.12(2.94,3.31)    | -2.58(-2.77,-2.38) | 1.38(1.17,1.58)    | 0.59(0.48,0.69)    | 111 |
| Peru                               | 1.65(1.39-1.96) | 119 | 1.78(1.50-2.11) | 122 | 1.05(0.80,1.30)    | -1.91(-2.03,-1.78) | 1.78(1.65,1.91)    | 0.30(0.20,0.41)    | 142 |
| Colombia                           | 2.21(1.88-2.59) | 101 | 2.20(1.86-2.59) | 113 | -0.21(-0.51,0.09)  | -1.42(-1.63,-1.21) | 1.49(1.34,1.64)    | 0.02(-0.11,0.15)   | 178 |
| Costa Rica                         | 2.55(2.16-2.99) | 78  | 2.32(1.99-2.73) | 110 | -0.31(-0.44,-0.19) | -1.53(-1.62,-1.45) | 0.74(0.67,0.80)    | -0.31(-0.37,-0.25) | 194 |
| El Salvador                        | 2.53(2.15-2.99) | 79  | 2.41(2.06-2.81) | 106 | 0.26(0.07,0.46)    | -1.23(-1.31,-1.14) | 0.44(0.34,0.54)    | -0.14(-0.22,-0.06) | 189 |
| Guatemala                          | 2.33(1.97-2.76) | 89  | 2.33(1.99-2.74) | 109 | 0.27(0.12,0.42)    | -1.37(-1.46,-1.28) | 0.89(0.82,0.95)    | 0.00(-0.07,0.06)   | 180 |
| Honduras                           | 2.29(1.95-2.69) | 90  | 2.16(1.83-2.55) | 117 | 0.12(-0.06,0.29)   | -1.73(-1.84,-1.62) | 0.77(0.69,0.85)    | -0.19(-0.27,-0.12) | 190 |
| Mexico                             | 3.99(3.46-4.63) | 62  | 3.06(2.67-3.52) | 79  | -1.83(-2.06,-1.59) | -1.58(-1.74,-1.42) | 0.69(0.57,0.80)    | -0.86(-0.97,-0.76) | 201 |
| Nicaragua                          | 2.38(2.02-2.84) | 83  | 2.06(1.77-2.43) | 118 | -0.55(-0.93,-0.18) | -0.87(-1.21,-0.53) | -0.41(-0.51,-0.32) | -0.55(-0.72,-0.38) | 198 |
| Panama                             | 2.45(2.13-2.82) | 81  | 2.20(1.88-2.56) | 114 | -0.40(-0.91,0.12)  | -2.16(-2.49,-1.82) | 1.12(0.86,1.38)    | -0.40(-0.62,-0.18) | 196 |
| Venezuela (Bolivarian Republic of) | 2.27(1.98-2.57) | 93  | 2.18(1.85-2.55) | 115 | 0.27(0.13,0.41)    | -1.96(-2.24,-1.68) | 1.05(0.58,1.52)    | -0.19(-0.37,-0.01) | 191 |
| Brazil                             | 6.15(5.46-7.00) | 45  | 5.30(4.65-6.09) | 62  | -0.46(-0.62,-0.30) | -0.70(-1.44,0.05)  | -0.38(-0.48,-0.28) | -0.51(-0.75,-0.26) | 197 |
| Paraguay                           | 3.48(3.05-4.01) | 67  | 3.38(2.90-3.94) | 73  | 3.08(2.85,3.30)    | -3.04(-3.79,-2.28) | -0.39(-0.64,-0.14) | -0.05(-0.31,0.22)  | 184 |
| Algeria                            | 2.87(2.55-3.23) | 73  | 3.87(3.23-4.74) | 68  | 1.77(1.74,1.80)    | 0.65(0.50,0.81)    | 0.59(0.55,0.64)    | 1.02(0.97,1.07)    | 48  |
| Bahrain                            | 2.64(2.30-3.00) | 76  | 3.21(2.68-3.88) | 75  | 0.98(0.71,1.25)    | 0.70(-0.28,1.70)   | 0.40(0.15,0.65)    | 0.63(0.30,0.96)    | 104 |
| Egypt                              | 3.48(3.05-3.91) | 66  | 4.23(3.51-5.16) | 66  | 1.48(1.40,1.55)    | -0.79(-0.98,-0.60) | 1.16(0.95,1.36)    | 0.64(0.55,0.74)    | 101 |
| Iran (Islamic Republic of)         | 3.30(2.74-4.05) | 71  | 3.43(2.86-4.23) | 72  | 0.86(0.59,1.12)    | -0.32(-0.37,-0.28) | -0.32(-0.37,-0.28) | 0.14(0.04,0.23)    | 169 |
| Iraq                               | 1.82(1.55-2.12) | 114 | 2.54(2.12-3.08) | 100 | 0.38(0.19,0.56)    | 1.78(1.58,1.99)    | 1.07(0.92,1.21)    | 1.13(1.02,1.24)    | 36  |
| Jordan                             | 4.40(3.86-5.00) | 60  | 6.91(5.78-8.15) | 50  | 2.89(2.48,3.30)    | 0.96(0.91,1.02)    | 0.96(0.91,1.02)    | 1.56(1.43,1.69)    | 18  |
| Kuwait                             | 3.43(3.19-3.71) | 69  | 3.72(3.09-4.54) | 69  | 0.66(0.36,0.96)    | 0.58(-0.52,1.69)   | -0.52(-1.34,0.30)  | 0.32(-0.13,0.78)   | 141 |
| Lebanon                            | 2.34(1.93-2.90) | 87  | 3.56(2.97-4.37) | 70  | 1.93(1.77,2.09)    | 1.75(1.63,1.86)    | 0.74(0.68,0.79)    | 1.43(1.36,1.50)    | 19  |
| Libya                              | 1.64(1.37-1.99) | 120 | 2.41(2.01-2.96) | 107 | 2.83(2.62,3.03)    | -0.84(-1.25,-0.42) | 2.22(1.37,3.08)    | 1.30(0.99,1.61)    | 27  |
| Morocco                            | 1.43(1.21-1.69) | 124 | 1.61(1.36-1.91) | 126 | 0.37(0.31,0.43)    | 0.07(0.03,0.12)    | 0.75(0.73,0.77)    | 0.40(0.38,0.43)    | 134 |
| Palestine                          | 2.00(1.67-2.43) | 110 | 2.94(2.47-3.50) | 83  | 3.08(2.96,3.19)    | -0.13(-0.38,0.11)  | 0.95(0.79,1.12)    | 1.36(1.25,1.46)    | 25  |
| Oman                               | 2.43(2.02-2.90) | 82  | 2.73(2.27-3.27) | 93  | 1.98(1.61,2.36)    | -0.74(-1.15,-0.32) | -0.08(-0.16,0.01)  | 0.39(0.20,0.57)    | 136 |
| Qatar                              | 2.85(2.38-3.43) | 74  | 3.55(3.00-4.28) | 71  | 0.81(0.74,0.88)    | 0.95(0.92,0.98)    | 0.50(0.41,0.58)    | 0.78(0.74,0.82)    | 83  |
| Saudi Arabia                       | 2.64(2.24-3.13) | 77  | 2.66(2.24-3.18) | 96  | 1.05(0.90,1.20)    | -1.31(-1.48,-1.14) | 0.26(-0.21,0.74)   | -0.01(-0.18,0.15)  | 181 |
| Syrian Arab Republic               | 2.70(2.24-3.26) | 75  | 3.16(2.63-3.83) | 78  | 0.45(0.35,0.55)    | -0.82(-0.94,-0.70) | 2.17(1.77,2.57)    | 0.53(0.40,0.67)    | 117 |
| Tunisia                            | 2.36(1.97-2.86) | 86  | 2.73(2.25-3.32) | 92  | 0.52(0.44,0.60)    | 0.81(0.14,1.48)    | 0.25(0.09,0.41)    | 0.52(0.30,0.73)    | 120 |
| Turkey                             | 3.87(3.46-4.29) | 64  | 6.44(5.55-7.42) | 54  | 2.88(2.65,3.10)    | 0.04(-0.26,0.34)   | 2.65(2.33,2.97)    | 1.73(1.56,1.91)    | 15  |

|                                  |                 |     |                 |     |                    |                    |                    |                   |     |
|----------------------------------|-----------------|-----|-----------------|-----|--------------------|--------------------|--------------------|-------------------|-----|
| United Arab Emirates             | 3.21(2.70-3.87) | 72  | 4.12(3.40-5.01) | 67  | 1.99(1.92,2.06)    | 0.59(0.50,0.69)    | 0.05(-0.13,0.22)   | 0.85(0.78,0.92)   | 74  |
| Yemen                            | 2.12(1.75-2.59) | 103 | 2.54(2.10-3.09) | 99  | 0.69(0.66,0.71)    | 0.91(0.84,0.99)    | 0.24(0.10,0.38)    | 0.64(0.58,0.69)   | 102 |
| Afghanistan                      | 2.27(1.87-2.72) | 92  | 2.45(2.03-2.96) | 103 | -0.35(-0.38,-0.32) | 0.31(0.13,0.49)    | 0.73(0.65,0.80)    | 0.24(0.17,0.30)   | 153 |
| Bangladesh                       | 1.76(1.45-2.17) | 115 | 2.17(1.78-2.65) | 116 | 1.39(1.29,1.49)    | 0.33(0.11,0.56)    | 0.30(0.15,0.45)    | 0.71(0.61,0.81)   | 93  |
| Bhutan                           | 1.68(1.38-2.11) | 117 | 1.86(1.55-2.29) | 120 | 1.29(1.13,1.45)    | -1.03(-1.58,-0.47) | 1.28(1.07,1.49)    | 0.43(0.22,0.63)   | 129 |
| India                            | 2.23(1.85-2.73) | 98  | 2.34(1.95-2.86) | 108 | 0.81(0.77,0.85)    | 0.81(0.77,0.85)    | -1.12(-1.79,-0.45) | 0.21(0.00,0.42)   | 158 |
| Nepal                            | 1.66(1.37-2.07) | 118 | 2.24(1.85-2.76) | 112 | 1.32(1.23,1.41)    | 0.83(0.80,0.85)    | 0.97(0.89,1.05)    | 1.05(1.01,1.10)   | 42  |
| Pakistan                         | 1.91(1.59-2.34) | 112 | 2.30(1.91-2.86) | 111 | 0.78(0.69,0.87)    | 0.38(0.29,0.47)    | 0.71(0.68,0.74)    | 0.66(0.62,0.71)   | 98  |
| Angola                           | 1.09(0.91-1.34) | 137 | 1.32(1.12-1.59) | 136 | 0.68(0.65,0.70)    | 0.61(0.56,0.65)    | 0.69(0.65,0.73)    | 0.67(0.65,0.70)   | 96  |
| Central African Republic         | 1.10(0.92-1.37) | 136 | 1.13(0.94-1.35) | 155 | -0.04(-0.13,0.05)  | 0.12(0.10,0.15)    | 0.14(0.05,0.22)    | 0.08(0.04,0.12)   | 176 |
| Congo                            | 1.10(0.92-1.33) | 135 | 1.41(1.18-1.68) | 131 | 1.80(1.44,2.15)    | -0.12(-0.54,0.31)  | 0.93(0.84,1.01)    | 0.93(0.74,1.11)   | 59  |
| Democratic Republic of the Congo | 1.01(0.85-1.23) | 145 | 1.22(1.03-1.49) | 142 | 0.70(0.65,0.75)    | 0.14(-0.02,0.30)   | 1.40(1.12,1.68)    | 0.70(0.59,0.81)   | 94  |
| Equatorial Guinea                | 0.99(0.83-1.21) | 149 | 1.60(1.36-1.92) | 127 | 0.78(0.64,0.92)    | 2.84(2.49,3.20)    | 1.24(0.99,1.50)    | 1.61(1.45,1.76)   | 17  |
| Gabon                            | 1.21(1.02-1.47) | 131 | 1.56(1.30-1.88) | 128 | 1.06(1.02,1.09)    | 0.61(0.58,0.64)    | 0.95(0.89,1.01)    | 0.88(0.85,0.90)   | 68  |
| Burundi                          | 0.93(0.78-1.11) | 160 | 0.97(0.81-1.18) | 173 | 0.04(0.01,0.06)    | 0.62(0.59,0.65)    | -0.25(-0.33,-0.17) | 0.15(0.12,0.18)   | 167 |
| Comoros                          | 0.97(0.82-1.16) | 151 | 1.13(0.94-1.37) | 153 | 0.78(0.76,0.81)    | 0.01(-0.05,0.07)   | 0.87(0.74,0.99)    | 0.52(0.47,0.57)   | 121 |
| Djibouti                         | 0.96(0.81-1.15) | 157 | 1.01(0.85-1.22) | 168 | 0.94(0.83,1.06)    | -0.07(-0.12,-0.02) | -0.25(-0.37,-0.13) | 0.17(0.11,0.23)   | 164 |
| Eritrea                          | 0.90(0.77-1.09) | 164 | 1.09(0.90-1.31) | 160 | 0.99(0.95,1.03)    | 0.51(0.45,0.57)    | 0.42(0.39,0.46)    | 0.65(0.62,0.67)   | 99  |
| Ethiopia                         | 0.83(0.70-1.00) | 171 | 0.99(0.84-1.20) | 170 | 0.21(0.11,0.32)    | 0.82(0.68,0.96)    | 0.86(0.81,0.91)    | 0.62(0.56,0.68)   | 107 |
| Kenya                            | 0.87(0.74-1.05) | 168 | 1.16(0.99-1.39) | 150 | 0.12(0.07,0.18)    | 0.65(0.42,0.88)    | 1.97(1.62,2.32)    | 0.91(0.77,1.06)   | 62  |
| Madagascar                       | 0.99(0.84-1.21) | 148 | 1.06(0.90-1.29) | 162 | 0.19(0.12,0.25)    | 0.48(0.32,0.64)    | 0.08(0.04,0.12)    | 0.24(0.19,0.30)   | 154 |
| Malawi                           | 0.95(0.80-1.17) | 158 | 1.10(0.92-1.34) | 159 | 0.12(0.04,0.20)    | 0.63(0.48,0.78)    | 0.74(0.69,0.80)    | 0.50(0.44,0.55)   | 123 |
| Mauritius                        | 0.46(0.38-0.55) | 191 | 0.59(0.50-0.71) | 193 | 0.89(0.80,0.97)    | 0.67(0.65,0.69)    | 1.09(1.05,1.13)    | 0.88(0.85,0.91)   | 69  |
| Mozambique                       | 0.83(0.70-1.02) | 170 | 1.00(0.85-1.19) | 169 | 0.55(0.45,0.65)    | 0.83(0.81,0.86)    | 0.49(0.40,0.59)    | 0.64(0.59,0.69)   | 103 |
| Rwanda                           | 0.96(0.81-1.16) | 154 | 1.04(0.87-1.25) | 166 | 0.09(-0.02,0.19)   | 1.10(1.00,1.19)    | -0.29(-0.49,-0.08) | 0.29(0.20,0.37)   | 145 |
| Seychelles                       | 0.49(0.40-0.59) | 185 | 0.61(0.51-0.73) | 191 | 1.07(1.01,1.13)    | 0.24(0.17,0.31)    | 1.08(1.01,1.15)    | 0.79(0.75,0.82)   | 82  |
| Somalia                          | 0.77(0.65-0.94) | 172 | 0.76(0.63-0.94) | 176 | -0.08(-0.18,0.03)  | 0.23(0.02,0.43)    | -0.26(-0.31,-0.20) | -0.04(-0.12,0.03) | 183 |
| United Republic of Tanzania      | 0.91(0.76-1.11) | 161 | 1.05(0.88-1.28) | 165 | -0.17(-0.20,-0.14) | 0.53(0.34,0.71)    | 1.00(0.91,1.08)    | 0.47(0.41,0.54)   | 126 |
| Uganda                           | 0.90(0.76-1.10) | 167 | 1.07(0.90-1.30) | 161 | 0.30(0.26,0.35)    | 0.69(0.51,0.87)    | 0.84(0.74,0.94)    | 0.63(0.55,0.71)   | 105 |
| Zambia                           | 1.07(0.91-1.29) | 139 | 1.11(0.95-1.35) | 158 | 0.16(0.00,0.31)    | 0.86(0.68,1.04)    | -0.84(-0.96,-0.73) | 0.11(0.02,0.21)   | 173 |
| Botswana                         | 1.32(1.11-1.63) | 125 | 1.47(1.22-1.79) | 130 | -0.28(-0.55,0.00)  | 0.81(0.65,0.97)    | 0.57(0.36,0.78)    | 0.41(0.27,0.55)   | 133 |
| Lesotho                          | 1.18(0.99-1.43) | 132 | 1.36(1.14-1.65) | 135 | 0.49(0.44,0.55)    | 0.40(0.20,0.59)    | 0.64(0.60,0.69)    | 0.50(0.44,0.57)   | 124 |
| Namibia                          | 1.28(1.08-1.55) | 128 | 1.37(1.16-1.68) | 134 | 0.65(0.55,0.74)    | 0.31(0.26,0.35)    | -0.24(-0.33,-0.16) | 0.26(0.21,0.30)   | 150 |
| South Africa                     | 1.32(1.12-1.59) | 126 | 1.37(1.17-1.64) | 132 | 0.27(0.03,0.51)    | -0.36(-0.58,-0.13) | 0.55(0.48,0.61)    | 0.19(0.07,0.30)   | 160 |
| Eswatini                         | 1.28(1.07-1.55) | 129 | 1.49(1.26-1.81) | 129 | 0.66(0.60,0.71)    | 0.29(0.22,0.36)    | 0.72(0.69,0.74)    | 0.54(0.50,0.57)   | 115 |
| Zimbabwe                         | 1.23(1.04-1.49) | 130 | 1.30(1.09-1.59) | 137 | 0.85(0.60,1.11)    | -0.98(-1.10,-0.87) | 0.77(0.67,0.87)    | 0.19(0.10,0.28)   | 161 |
| Benin                            | 1.05(0.88-1.27) | 140 | 1.16(0.98-1.39) | 149 | -0.11(-0.22,-0.01) | 0.09(0.04,0.13)    | 1.18(0.86,1.51)    | 0.36(0.26,0.47)   | 138 |
| Burkina Faso                     | 0.97(0.82-1.17) | 152 | 1.05(0.89-1.27) | 164 | -0.08(-0.20,0.05)  | 0.02(-0.04,0.07)   | 0.87(0.73,1.01)    | 0.27(0.21,0.34)   | 148 |



|                                       |                    |     |                    |     |                    |                    |                    |                    |     |
|---------------------------------------|--------------------|-----|--------------------|-----|--------------------|--------------------|--------------------|--------------------|-----|
| Cameroon                              | 1.16(0.97-1.42)    | 133 | 1.28(1.08-1.56)    | 139 | 0.52(0.29,0.75)    | -0.25(-0.43,-0.07) | 0.59(0.26,0.92)    | 0.28(0.12,0.44)    | 146 |
| Cabo Verde                            | 0.96(0.81-1.16)    | 155 | 1.19(1.00-1.44)    | 146 | 0.59(0.55,0.62)    | 0.30(0.25,0.35)    | 1.43(1.23,1.64)    | 0.74(0.68,0.81)    | 90  |
| Chad                                  | 0.90(0.75-1.09)    | 166 | 0.99(0.83-1.20)    | 172 | 0.00(-0.11,0.11)   | -0.39(-0.42,-0.35) | 1.46(1.29,1.64)    | 0.30(0.24,0.37)    | 143 |
| Cote d'Ivoire                         | 1.07(0.90-1.32)    | 138 | 1.26(1.05-1.55)    | 140 | 0.96(0.81,1.12)    | -0.35(-0.43,-0.28) | 1.18(0.65,1.71)    | 0.53(0.36,0.70)    | 118 |
| Gambia                                | 0.91(0.76-1.09)    | 163 | 1.22(1.03-1.49)    | 143 | 0.41(0.31,0.51)    | 1.31(1.24,1.38)    | 1.26(0.87,1.65)    | 1.01(0.89,1.14)    | 49  |
| Ghana                                 | 1.00(0.84-1.20)    | 147 | 1.20(1.01-1.46)    | 145 | 0.79(0.56,1.01)    | 0.01(-0.18,0.20)   | 0.90(0.63,1.18)    | 0.56(0.41,0.71)    | 113 |
| Guinea                                | 0.97(0.81-1.19)    | 150 | 1.06(0.89-1.27)    | 163 | 0.20(0.17,0.24)    | -0.41(-0.49,-0.34) | 1.18(1.03,1.34)    | 0.28(0.23,0.34)    | 147 |
| Guinea-Bissau                         | 1.00(0.84-1.23)    | 146 | 1.13(0.94-1.38)    | 154 | 0.22(0.17,0.27)    | -0.14(-0.20,-0.09) | 1.21(0.98,1.43)    | 0.40(0.32,0.47)    | 135 |
| Liberia                               | 1.05(0.88-1.27)    | 141 | 1.18(1.00-1.42)    | 148 | -0.28(-0.36,-0.19) | -0.04(-0.19,0.10)  | 1.49(1.34,1.63)    | 0.43(0.36,0.50)    | 130 |
| Mali                                  | 0.91(0.77-1.12)    | 162 | 1.02(0.87-1.24)    | 167 | 0.70(0.65,0.74)    | -0.75(-0.80,-0.70) | 1.34(1.22,1.45)    | 0.39(0.35,0.44)    | 137 |
| Mauritania                            | 1.11(0.93-1.35)    | 134 | 1.12(0.94-1.36)    | 157 | -1.49(-1.65,-1.34) | 0.87(0.65,1.09)    | 0.74(0.39,1.08)    | -0.02(-0.16,0.12)  | 182 |
| Niger                                 | 0.86(0.72-1.03)    | 169 | 0.90(0.76-1.09)    | 174 | 0.14(0.08,0.21)    | -0.73(-0.82,-0.65) | 1.11(0.90,1.33)    | 0.14(0.06,0.21)    | 170 |
| Nigeria                               | 1.02(0.87-1.23)    | 144 | 1.20(1.02-1.45)    | 144 | 0.05(-0.02,0.13)   | -0.28(-0.59,0.03)  | 2.08(1.66,2.50)    | 0.54(0.35,0.72)    | 116 |
| Sao Tome and Principe                 | 0.90(0.76-1.09)    | 165 | 1.15(0.96-1.41)    | 151 | 0.52(0.42,0.62)    | -0.40(-0.53,-0.28) | 2.61(2.32,2.90)    | 0.84(0.74,0.94)    | 75  |
| Senegal                               | 1.04(0.87-1.25)    | 142 | 1.18(1.00-1.47)    | 147 | 0.03(0.00,0.07)    | -0.21(-0.36,-0.05) | 1.66(1.45,1.87)    | 0.43(0.34,0.53)    | 131 |
| Sierra Leone                          | 1.03(0.87-1.27)    | 143 | 1.12(0.95-1.37)    | 156 | -0.22(-0.26,-0.18) | -0.53(-0.67,-0.38) | 1.74(1.53,1.94)    | 0.26(0.17,0.34)    | 151 |
| Togo                                  | 0.96(0.81-1.17)    | 156 | 1.23(1.04-1.48)    | 141 | 1.64(1.39,1.89)    | -0.26(-0.37,-0.14) | 1.39(0.86,1.93)    | 0.84(0.65,1.03)    | 76  |
| American Samoa                        | 0.49(0.41-0.58)    | 184 | 0.64(0.54-0.77)    | 187 | 0.53(0.49,0.57)    | 1.15(1.10,1.20)    | 0.99(0.85,1.13)    | 0.93(0.87,0.99)    | 60  |
| Bermuda                               | 2.34(1.97-2.86)    | 88  | 2.91(2.46-3.47)    | 87  | 1.52(1.27,1.76)    | -0.79(-0.94,-0.64) | 1.38(1.28,1.49)    | 0.77(0.67,0.88)    | 84  |
| Cook Islands                          | 0.54(0.45-0.64)    | 179 | 0.74(0.63-0.90)    | 180 | 0.54(0.51,0.57)    | 1.35(1.23,1.46)    | 1.34(1.27,1.41)    | 1.12(1.07,1.17)    | 37  |
| Greenland                             | 19.43(16.54-23.03) | 9   | 24.18(20.79-27.92) | 5   | 1.41(1.22,1.61)    | 0.87(0.82,0.92)    | 0.03(-0.16,0.22)   | 0.75(0.66,0.84)    | 89  |
| Guam                                  | 0.55(0.46-0.66)    | 178 | 0.75(0.64-0.90)    | 178 | 0.39(0.27,0.51)    | 1.40(1.31,1.48)    | 1.25(1.15,1.35)    | 1.04(0.98,1.11)    | 43  |
| Monaco                                | 9.42(8.02-11.14)   | 27  | 9.53(8.11-11.17)   | 29  | 0.38(0.25,0.52)    | -0.08(-0.14,-0.02) | -0.16(-0.18,-0.15) | 0.04(-0.01,0.09)   | 177 |
| Nauru                                 | 0.47(0.39-0.57)    | 189 | 0.64(0.54-0.77)    | 188 | 1.80(0.82,2.80)    | 0.98(0.80,1.17)    | 0.22(-0.25,0.68)   | 1.00(0.65,1.35)    | 52  |
| Niue                                  | 0.51(0.43-0.62)    | 182 | 0.73(0.61-0.87)    | 181 | 0.64(0.59,0.70)    | 1.75(1.69,1.81)    | 1.15(1.11,1.19)    | 1.23(1.19,1.26)    | 29  |
| Northern Mariana Islands              | 0.60(0.50-0.71)    | 176 | 0.74(0.63-0.89)    | 179 | 0.21(0.20,0.23)    | 1.01(0.95,1.06)    | 1.00(0.90,1.10)    | 0.76(0.73,0.80)    | 88  |
| Palau                                 | 0.56(0.47-0.66)    | 177 | 0.76(0.64-0.91)    | 175 | 0.66(0.63,0.70)    | 1.23(1.07,1.38)    | 1.30(1.06,1.53)    | 1.09(0.99,1.19)    | 38  |
| Puerto Rico                           | 2.37(2.18-2.58)    | 84  | 2.93(2.62-3.25)    | 85  | 1.49(1.18,1.80)    | -0.89(-1.08,-0.70) | 1.37(1.21,1.53)    | 0.72(0.59,0.86)    | 92  |
| Saint Kitts and Nevis                 | 2.15(1.82-2.57)    | 102 | 2.93(2.48-3.54)    | 84  | 2.69(2.40,2.97)    | -0.82(-0.91,-0.72) | 1.81(1.69,1.92)    | 1.07(0.97,1.17)    | 39  |
| San Marino                            | 8.46(7.22-9.99)    | 32  | 9.06(7.71-10.59)   | 36  | 0.60(0.54,0.66)    | -0.15(-0.18,-0.11) | 0.21(0.19,0.24)    | 0.24(0.22,0.27)    | 155 |
| Tokelau                               | 0.51(0.43-0.61)    | 181 | 0.64(0.54-0.78)    | 186 | 0.24(0.09,0.39)    | -0.16(-0.56,0.24)  | 2.28(2.14,2.42)    | 0.77(0.62,0.91)    | 85  |
| Tuvalu                                | 0.48(0.40-0.58)    | 186 | 0.69(0.57-0.83)    | 183 | 1.06(1.00,1.12)    | 1.35(1.23,1.47)    | 1.11(1.05,1.17)    | 1.19(1.14,1.25)    | 32  |
| United States Virgin Islands          | 2.24(1.89-2.65)    | 95  | 2.91(2.47-3.50)    | 86  | 2.21(2.09,2.33)    | -0.39(-0.53,-0.24) | 1.01(0.68,1.34)    | 0.94(0.82,1.06)    | 58  |
| South Sudan                           | 0.94(0.80-1.14)    | 159 | 0.99(0.84-1.20)    | 171 | 0.05(-0.04,0.14)   | 0.45(0.25,0.64)    | 0.04(-0.01,0.08)   | 0.18(0.11,0.24)    | 162 |
| Sudan                                 | 2.23(1.86-2.68)    | 97  | 2.77(2.32-3.33)    | 90  | 0.71(0.68,0.74)    | 0.53(0.50,0.56)    | 0.98(0.94,1.03)    | 0.73(0.71,0.76)    | 91  |
| <b>Multiple sclerosis</b>             |                    |     |                    |     |                    |                    |                    |                    |     |
| China                                 | 0.18(0.15-0.22)    | 183 | 0.17(0.14-0.21)    | 185 | -0.50(-0.51,-0.48) | -0.50(-0.51,-0.48) | 0.48(0.38,0.58)    | -0.19(-0.23,-0.16) | 190 |
| Democratic People's Republic of Korea | 0.30(0.24-0.36)    | 136 | 0.29(0.24-0.35)    | 143 | -0.37(-0.41,-0.33) | -0.23(-0.28,-0.17) | 0.24(0.22,0.26)    | -0.12(-0.15,-0.10) | 180 |

|                                  |                 |     |                 |     |                    |                    |                    |                    |     |
|----------------------------------|-----------------|-----|-----------------|-----|--------------------|--------------------|--------------------|--------------------|-----|
| Taiwan (Province of China)       | 0.17(0.15-0.19) | 185 | 0.27(0.23-0.31) | 151 | -0.61(-0.67,-0.55) | 3.62(3.49,3.76)    | 2.17(1.97,2.36)    | 1.55(1.47,1.63)    | 1   |
| Cambodia                         | 0.19(0.15-0.22) | 179 | 0.18(0.15-0.22) | 182 | -0.18(-0.23,-0.13) | -0.14(-0.15,-0.13) | -0.07(-0.10,-0.03) | -0.13(-0.15,-0.11) | 183 |
| Indonesia                        | 0.16(0.13-0.19) | 188 | 0.16(0.13-0.19) | 187 | -0.10(-0.11,-0.10) | -0.01(-0.02,0.00)  | 0.05(0.03,0.08)    | -0.02(-0.03,-0.01) | 152 |
| Lao People's Democratic Republic | 0.23(0.19-0.27) | 160 | 0.22(0.18-0.26) | 164 | -0.25(-0.28,-0.22) | -0.20(-0.29,-0.12) | 0.15(0.10,0.21)    | -0.10(-0.14,-0.07) | 175 |
| Malaysia                         | 0.13(0.10-0.15) | 202 | 0.12(0.10-0.15) | 202 | 0.06(0.05,0.08)    | -0.04(-0.06,-0.02) | -0.20(-0.34,-0.06) | -0.06(-0.10,-0.01) | 163 |
| Maldives                         | 0.12(0.10-0.15) | 203 | 0.11(0.09-0.14) | 203 | -0.18(-0.20,-0.16) | -0.29(-0.29,-0.28) | -0.50(-0.53,-0.47) | -0.32(-0.34,-0.31) | 195 |
| Myanmar                          | 0.26(0.21-0.31) | 148 | 0.25(0.21-0.30) | 156 | -0.11(-0.18,-0.03) | -0.15(-0.16,-0.13) | -0.15(-0.16,-0.13) | -0.13(-0.15,-0.10) | 184 |
| Philippines                      | 0.19(0.16-0.23) | 176 | 0.19(0.16-0.23) | 176 | -0.12(-0.16,-0.08) | 0.02(-0.01,0.06)   | 0.27(0.25,0.28)    | 0.06(0.04,0.08)    | 128 |
| Sri Lanka                        | 0.16(0.13-0.19) | 187 | 0.16(0.13-0.19) | 189 | 0.28(0.27,0.29)    | -0.04(-0.05,-0.03) | -0.53(-0.64,-0.43) | -0.10(-0.13,-0.06) | 176 |
| Thailand                         | 0.19(0.15-0.22) | 180 | 0.18(0.15-0.22) | 183 | -0.19(-0.22,-0.17) | -0.15(-0.16,-0.14) | -0.05(-0.06,-0.04) | -0.13(-0.14,-0.12) | 185 |
| Timor-Leste                      | 0.15(0.12-0.18) | 192 | 0.15(0.12-0.19) | 191 | -0.12(-0.18,-0.06) | -0.09(-0.11,-0.06) | 0.20(0.17,0.23)    | 0.00(-0.03,0.02)   | 148 |
| Viet Nam                         | 0.20(0.16-0.24) | 168 | 0.20(0.16-0.24) | 172 | -0.14(-0.18,-0.10) | -0.04(-0.09,0.01)  | 0.02(0.01,0.03)    | -0.05(-0.07,-0.03) | 159 |
| Fiji                             | 0.19(0.15-0.22) | 182 | 0.18(0.15-0.22) | 181 | -0.27(-0.32,-0.22) | -0.05(-0.08,-0.01) | 0.19(0.16,0.22)    | -0.04(-0.07,-0.02) | 156 |
| Kiribati                         | 0.15(0.12-0.17) | 195 | 0.14(0.12-0.17) | 196 | 0.53(0.51,0.54)    | -0.03(-0.05,-0.01) | -0.90(-1.03,-0.77) | -0.13(-0.18,-0.09) | 186 |
| Marshall Islands                 | 0.15(0.13-0.18) | 191 | 0.15(0.12-0.18) | 193 | 0.23(0.20,0.25)    | -0.03(-0.07,0.01)  | -0.42(-0.46,-0.37) | -0.07(-0.09,-0.04) | 168 |
| Micronesia (Federated States of) | 0.15(0.12-0.18) | 194 | 0.14(0.11-0.17) | 195 | 0.10(0.09,0.10)    | -0.08(-0.09,-0.07) | -0.38(-0.42,-0.34) | -0.12(-0.13,-0.11) | 181 |
| Papua New Guinea                 | 0.13(0.10-0.16) | 200 | 0.13(0.10-0.15) | 200 | -0.21(-0.26,-0.16) | -0.03(-0.10,0.04)  | 0.05(0.02,0.07)    | -0.06(-0.09,-0.04) | 164 |
| Samoa                            | 0.17(0.14-0.20) | 186 | 0.16(0.13-0.20) | 186 | -0.14(-0.18,-0.11) | -0.09(-0.13,-0.05) | -0.07(-0.07,-0.06) | -0.09(-0.11,-0.08) | 173 |
| Solomon Islands                  | 0.16(0.13-0.19) | 190 | 0.16(0.13-0.19) | 190 | 0.10(0.09,0.10)    | -0.06(-0.07,-0.06) | -0.35(-0.38,-0.31) | -0.10(-0.11,-0.09) | 177 |
| Tonga                            | 0.20(0.16-0.24) | 171 | 0.20(0.16-0.24) | 173 | -0.33(-0.36,-0.29) | -0.05(-0.08,-0.03) | 0.21(0.19,0.23)    | -0.06(-0.07,-0.04) | 165 |
| Vanuatu                          | 0.19(0.15-0.23) | 178 | 0.19(0.15-0.22) | 180 | -0.20(-0.21,-0.19) | -0.05(-0.05,-0.04) | 0.10(0.09,0.10)    | -0.05(-0.05,-0.05) | 160 |
| Armenia                          | 1.11(0.97-1.28) | 60  | 1.41(1.23-1.60) | 50  | 1.01(0.94,1.07)    | 0.83(0.75,0.92)    | 0.64(0.58,0.70)    | 0.83(0.79,0.87)    | 16  |
| Azerbaijan                       | 0.84(0.70-0.98) | 74  | 0.91(0.75-1.07) | 74  | -0.38(-0.44,-0.32) | 0.30(0.24,0.37)    | 1.07(0.57,1.57)    | 0.32(0.16,0.48)    | 67  |
| Georgia                          | 0.89(0.74-1.05) | 71  | 1.11(0.94-1.28) | 63  | 0.60(0.11,1.10)    | 0.66(0.56,0.76)    | 1.25(1.05,1.46)    | 0.83(0.65,1.00)    | 17  |
| Kazakhstan                       | 2.75(2.46-3.06) | 14  | 2.77(2.48-3.10) | 18  | 0.71(0.68,0.74)    | 0.30(0.26,0.34)    | -0.89(-1.24,-0.53) | 0.04(-0.07,0.16)   | 138 |
| Kyrgyzstan                       | 0.85(0.72-1.01) | 73  | 0.87(0.71-1.03) | 77  | -0.79(-0.84,-0.75) | 0.06(0.01,0.11)    | 1.06(0.67,1.45)    | 0.10(-0.02,0.22)   | 109 |
| Mongolia                         | 1.02(0.84-1.23) | 63  | 1.03(0.85-1.22) | 66  | -1.21(-1.28,-1.14) | 0.08(0.00,0.15)    | 1.45(0.88,2.01)    | 0.09(-0.09,0.27)   | 115 |
| Tajikistan                       | 0.78(0.65-0.93) | 76  | 0.83(0.69-0.98) | 79  | -0.55(-0.61,-0.48) | 0.21(0.14,0.28)    | 1.13(0.61,1.65)    | 0.25(0.09,0.42)    | 79  |
| Turkmenistan                     | 1.56(1.40-1.74) | 34  | 1.60(1.43-1.78) | 38  | 0.15(0.14,0.16)    | 0.09(0.07,0.12)    | -0.02(-0.11,0.06)  | 0.07(0.04,0.10)    | 123 |
| Uzbekistan                       | 1.27(1.10-1.44) | 44  | 1.02(0.86-1.19) | 68  | -0.78(-0.84,-0.72) | -0.53(-0.55,-0.51) | -0.92(-1.01,-0.82) | -0.76(-0.79,-0.72) | 202 |
| Albania                          | 4.07(3.73-4.40) | 4   | 3.05(2.80-3.29) | 13  | 0.14(0.03,0.26)    | -0.44(-0.57,-0.31) | -2.48(-3.69,-1.25) | -0.92(-1.31,-0.52) | 203 |
| Bosnia and Herzegovina           | 1.14(0.99-1.30) | 57  | 1.14(1.01-1.26) | 62  | 0.14(0.10,0.18)    | -0.04(-0.05,-0.02) | -0.11(-0.13,-0.09) | -0.01(-0.03,0.01)  | 150 |
| Bulgaria                         | 2.09(1.91-2.31) | 22  | 1.93(1.74-2.12) | 28  | 0.40(0.32,0.47)    | 0.04(-0.03,0.12)   | -1.56(-2.20,-0.92) | -0.35(-0.55,-0.14) | 196 |
| Croatia                          | 0.97(0.84-1.09) | 67  | 1.18(1.04-1.32) | 58  | 1.21(1.14,1.28)    | 0.75(0.70,0.79)    | 0.12(0.09,0.15)    | 0.70(0.66,0.73)    | 27  |
| Czechia                          | 1.56(1.39-1.72) | 35  | 1.38(1.21-1.54) | 51  | -0.18(-0.26,-0.11) | -0.47(-0.55,-0.38) | -0.60(-0.66,-0.54) | -0.42(-0.47,-0.38) | 198 |
| Hungary                          | 1.93(1.80-2.08) | 26  | 1.45(1.27-1.63) | 48  | 0.08(0.02,0.14)    | -0.09(-0.21,0.03)  | -3.03(-3.63,-2.44) | -0.96(-1.16,-0.76) | 204 |
| North Macedonia                  | 1.31(1.14-1.47) | 43  | 1.58(1.39-1.76) | 39  | 1.09(1.06,1.13)    | 0.67(0.63,0.71)    | 0.10(0.03,0.17)    | 0.62(0.60,0.65)    | 34  |
| Montenegro                       | 1.95(1.77-2.14) | 24  | 2.03(1.85-2.23) | 26  | 0.56(0.54,0.59)    | 0.33(0.31,0.36)    | -0.50(-0.73,-0.27) | 0.14(0.06,0.21)    | 100 |

|                     |                 |     |                 |     |                    |                    |                    |                    |     |
|---------------------|-----------------|-----|-----------------|-----|--------------------|--------------------|--------------------|--------------------|-----|
| Poland              | 2.51(2.17-2.84) | 16  | 2.30(2.05-2.55) | 22  | -0.56(-0.65,-0.47) | -0.16(-0.21,-0.11) | -0.26(-0.28,-0.25) | -0.31(-0.35,-0.28) | 194 |
| Romania             | 0.85(0.73-0.98) | 72  | 0.77(0.64-0.89) | 84  | -0.43(-0.45,-0.41) | -0.26(-0.33,-0.20) | -0.41(-0.52,-0.31) | -0.36(-0.40,-0.32) | 197 |
| Serbia              | 1.57(1.42-1.73) | 33  | 1.91(1.73-2.08) | 29  | 1.44(1.30,1.57)    | 0.39(0.33,0.44)    | 0.29(0.27,0.31)    | 0.68(0.63,0.73)    | 28  |
| Slovakia            | 1.05(0.90-1.21) | 61  | 1.16(1.00-1.33) | 61  | -0.01(-0.02,0.01)  | 0.36(0.25,0.47)    | 0.68(0.59,0.78)    | 0.35(0.30,0.39)    | 63  |
| Slovenia            | 1.62(1.45-1.79) | 32  | 1.69(1.52-1.86) | 35  | 0.49(0.48,0.51)    | 0.18(0.14,0.21)    | -0.23(-0.32,-0.14) | 0.15(0.12,0.18)    | 97  |
| Belarus             | 0.93(0.77-1.08) | 70  | 0.90(0.75-1.06) | 75  | -0.27(-0.33,-0.20) | -0.01(-0.06,0.05)  | 0.08(-0.08,0.25)   | -0.06(-0.12,0.00)  | 166 |
| Estonia             | 1.26(1.09-1.42) | 48  | 1.10(0.95-1.25) | 64  | -0.52(-0.56,-0.48) | -0.15(-0.19,-0.11) | -0.71(-0.87,-0.55) | -0.45(-0.50,-0.40) | 199 |
| Latvia              | 1.35(1.19-1.52) | 41  | 1.26(1.10-1.43) | 54  | -0.32(-0.38,-0.27) | -0.09(-0.12,-0.06) | -0.30(-0.45,-0.16) | -0.23(-0.28,-0.18) | 191 |
| Lithuania           | 1.26(1.11-1.43) | 45  | 1.18(1.02-1.34) | 59  | -0.20(-0.22,-0.18) | -0.05(-0.06,-0.04) | -0.50(-0.53,-0.46) | -0.23(-0.25,-0.22) | 192 |
| Republic of Moldova | 0.66(0.53-0.79) | 84  | 0.68(0.58-0.79) | 87  | -0.20(-0.49,0.10)  | 0.04(-0.18,0.27)   | 0.47(0.41,0.54)    | 0.13(0.01,0.26)    | 104 |
| Russian Federation  | 1.13(0.96-1.30) | 59  | 0.94(0.79-1.09) | 73  | -0.83(-0.89,-0.78) | -0.23(-0.28,-0.17) | -0.85(-1.05,-0.65) | -0.63(-0.70,-0.56) | 201 |
| Ukraine             | 1.76(1.51-2.01) | 28  | 1.47(1.26-1.69) | 45  | -0.46(-0.56,-0.37) | -0.11(-0.15,-0.06) | -1.35(-1.66,-1.03) | -0.60(-0.71,-0.50) | 200 |
| Brunei Darussalam   | 0.15(0.12-0.18) | 193 | 0.15(0.12-0.19) | 192 | 0.88(0.86,0.90)    | 0.09(0.07,0.11)    | -0.70(-0.88,-0.52) | 0.09(0.04,0.15)    | 116 |
| Japan               | 0.34(0.27-0.41) | 125 | 0.37(0.30-0.45) | 122 | 0.46(0.34,0.58)    | -0.04(-0.07,0.00)  | 0.56(0.48,0.64)    | 0.34(0.29,0.39)    | 64  |
| Republic of Korea   | 0.38(0.30-0.46) | 109 | 0.37(0.30-0.45) | 121 | -0.34(-0.37,-0.31) | -0.04(-0.07,-0.01) | 0.17(0.15,0.19)    | -0.07(-0.09,-0.05) | 169 |
| Singapore           | 0.13(0.10-0.15) | 201 | 0.13(0.10-0.15) | 201 | 0.73(0.70,0.76)    | 0.05(0.01,0.08)    | -0.88(-1.17,-0.60) | -0.04(-0.13,0.05)  | 157 |
| Australia           | 1.55(1.39-1.71) | 36  | 2.20(1.91-2.48) | 24  | 3.63(3.41,3.86)    | 0.36(0.30,0.42)    | -0.69(-0.89,-0.48) | 1.21(1.11,1.32)    | 5   |
| New Zealand         | 1.51(1.28-1.72) | 37  | 1.41(1.20-1.61) | 49  | -0.28(-0.29,-0.28) | -0.10(-0.10,-0.09) | -0.34(-0.40,-0.27) | -0.23(-0.25,-0.21) | 193 |
| Andorra             | 1.94(1.71-2.22) | 25  | 2.20(1.93-2.51) | 23  | 0.87(0.85,0.90)    | 0.33(0.31,0.36)    | 0.12(0.07,0.16)    | 0.45(0.43,0.47)    | 49  |
| Austria             | 2.18(1.90-2.49) | 21  | 2.83(2.50-3.22) | 16  | 1.40(1.36,1.44)    | 0.60(0.57,0.62)    | 0.74(0.55,0.94)    | 0.92(0.85,0.98)    | 8   |
| Belgium             | 2.46(2.20-2.71) | 17  | 2.70(2.37-3.12) | 19  | 0.36(0.34,0.38)    | 0.43(0.38,0.48)    | 0.14(0.10,0.18)    | 0.31(0.29,0.34)    | 68  |
| Cyprus              | 1.20(1.06-1.33) | 52  | 1.53(1.30-1.78) | 40  | 0.50(0.46,0.53)    | 1.56(1.50,1.63)    | 0.33(0.28,0.37)    | 0.85(0.82,0.88)    | 12  |
| Denmark             | 4.02(3.73-4.35) | 5   | 4.30(3.87-4.79) | 6   | 0.26(0.21,0.30)    | 0.58(0.54,0.62)    | -0.25(-0.41,-0.09) | 0.22(0.17,0.27)    | 83  |
| Finland             | 2.53(2.31-2.75) | 15  | 2.90(2.66-3.15) | 15  | 0.51(0.44,0.58)    | -0.25(-0.39,-0.10) | 1.07(0.75,1.38)    | 0.40(0.28,0.51)    | 55  |
| France              | 2.34(2.03-2.71) | 18  | 2.99(2.68-3.32) | 14  | 1.51(1.42,1.59)    | 0.58(0.56,0.60)    | 0.24(0.20,0.29)    | 0.84(0.80,0.87)    | 13  |
| Germany             | 2.75(2.45-3.12) | 13  | 3.15(2.79-3.60) | 12  | 0.79(0.78,0.81)    | 0.43(0.41,0.46)    | 0.17(0.13,0.22)    | 0.47(0.45,0.48)    | 44  |
| Greece              | 1.03(0.89-1.16) | 62  | 1.32(1.13-1.52) | 53  | 0.75(0.74,0.77)    | 0.58(0.56,0.60)    | 1.35(1.29,1.41)    | 0.88(0.86,0.90)    | 11  |
| Iceland             | 3.76(3.57-3.97) | 6   | 3.78(3.29-4.37) | 7   | 0.12(0.10,0.13)    | 0.29(0.27,0.31)    | -0.45(-0.79,-0.10) | 0.01(-0.09,0.12)   | 145 |
| Ireland             | 4.09(3.63-4.56) | 3   | 4.34(3.74-5.00) | 5   | 0.70(0.63,0.77)    | 0.82(0.78,0.85)    | -0.92(-1.10,-0.75) | 0.22(0.16,0.28)    | 84  |
| Israel              | 1.14(0.94-1.33) | 58  | 1.24(1.03-1.45) | 56  | -0.07(-0.12,-0.03) | 0.44(0.42,0.47)    | 0.52(0.44,0.61)    | 0.31(0.28,0.34)    | 69  |
| Italy               | 2.22(1.90-2.55) | 20  | 2.81(2.39-3.27) | 17  | 0.38(0.36,0.39)    | 1.22(1.18,1.26)    | 0.70(0.61,0.79)    | 0.80(0.77,0.84)    | 21  |
| Luxembourg          | 2.97(2.66-3.32) | 12  | 3.16(2.78-3.61) | 11  | 0.49(0.47,0.51)    | 0.24(0.22,0.26)    | -0.14(-0.30,0.02)  | 0.21(0.16,0.26)    | 86  |
| Malta               | 0.77(0.67-0.87) | 78  | 0.97(0.81-1.12) | 71  | 0.27(0.25,0.30)    | 0.27(0.25,0.30)    | 1.98(1.67,2.29)    | 0.80(0.70,0.90)    | 22  |
| Netherlands         | 3.08(2.76-3.48) | 11  | 3.25(2.84-3.71) | 10  | 0.16(0.10,0.21)    | 0.49(0.41,0.57)    | -0.21(-0.29,-0.12) | 0.17(0.12,0.21)    | 93  |
| Norway              | 3.50(3.03-3.98) | 7   | 5.05(4.33-5.84) | 2   | 1.47(1.28,1.66)    | 0.88(0.49,1.27)    | 1.52(1.40,1.64)    | 1.30(1.16,1.45)    | 4   |
| Portugal            | 1.20(1.00-1.38) | 53  | 1.16(1.06-1.26) | 60  | -0.16(-0.17,-0.15) | -0.05(-0.05,-0.04) | -0.12(-0.17,-0.07) | -0.11(-0.12,-0.09) | 179 |
| Spain               | 1.87(1.67-2.07) | 27  | 2.63(2.41-2.83) | 20  | 1.98(1.20,2.76)    | 0.84(0.75,0.92)    | 0.84(0.75,0.92)    | 1.19(0.94,1.44)    | 7   |
| Sweden              | 4.52(3.93-5.11) | 1   | 5.32(4.68-6.01) | 1   | 0.73(0.65,0.82)    | 0.67(0.59,0.75)    | 0.31(0.26,0.37)    | 0.58(0.54,0.63)    | 36  |

|                                    |                 |     |                 |     |                    |                   |                    |                  |     |
|------------------------------------|-----------------|-----|-----------------|-----|--------------------|-------------------|--------------------|------------------|-----|
| Switzerland                        | 3.23(2.90-3.61) | 10  | 3.38(3.01-3.80) | 9   | 0.33(0.30,0.36)    | 0.18(0.12,0.25)   | -0.11(-0.16,-0.06) | 0.15(0.12,0.18)  | 98  |
| United Kingdom                     | 3.41(3.02-3.80) | 9   | 4.40(3.89-4.95) | 4   | 1.14(0.99,1.29)    | 0.77(0.71,0.83)   | 0.80(0.64,0.95)    | 0.90(0.82,0.98)  | 10  |
| Argentina                          | 0.97(0.81-1.12) | 66  | 0.99(0.83-1.15) | 69  | 0.40(0.38,0.41)    | -0.01(-0.02,0.00) | -0.19(-0.28,-0.10) | 0.07(0.05,0.10)  | 124 |
| Chile                              | 0.78(0.63-0.93) | 77  | 0.82(0.67-0.98) | 80  | -0.32(-0.34,-0.30) | 0.11(0.09,0.13)   | 0.82(0.64,1.00)    | 0.20(0.14,0.26)  | 88  |
| Uruguay                            | 0.93(0.79-1.08) | 69  | 0.96(0.81-1.11) | 72  | 0.30(0.28,0.32)    | 0.11(0.05,0.18)   | -0.15(-0.28,-0.03) | 0.09(0.04,0.14)  | 117 |
| Canada                             | 4.12(4.02-4.22) | 2   | 4.76(4.63-4.89) | 3   | 0.37(0.28,0.46)    | 0.19(0.16,0.22)   | 0.98(0.88,1.08)    | 0.49(0.44,0.54)  | 42  |
| United States of America           | 3.41(2.96-3.87) | 8   | 3.44(3.14-3.73) | 8   | -0.45(-0.54,-0.35) | 0.29(0.27,0.31)   | 0.19(0.14,0.25)    | 0.04(0.01,0.08)  | 139 |
| Antigua and Barbuda                | 0.60(0.51-0.68) | 88  | 0.76(0.65-0.86) | 85  | 2.02(1.98,2.06)    | 0.80(0.74,0.85)   | -0.33(-0.36,-0.30) | 0.81(0.79,0.84)  | 19  |
| Bahamas                            | 0.51(0.42-0.60) | 90  | 0.57(0.47-0.67) | 90  | 0.57(0.56,0.59)    | 0.39(0.38,0.41)   | 0.24(0.20,0.29)    | 0.40(0.38,0.42)  | 56  |
| Barbados                           | 0.56(0.47-0.65) | 89  | 0.72(0.61-0.82) | 86  | 1.93(1.85,2.01)    | 0.81(0.75,0.87)   | -0.31(-0.35,-0.26) | 0.81(0.78,0.85)  | 20  |
| Belize                             | 0.34(0.28-0.41) | 123 | 0.38(0.30-0.45) | 117 | 0.08(0.06,0.10)    | 0.37(0.35,0.39)   | 0.58(0.45,0.71)    | 0.34(0.30,0.38)  | 65  |
| Cuba                               | 0.50(0.42-0.59) | 91  | 0.57(0.48-0.66) | 91  | 0.80(0.78,0.83)    | 0.49(0.38,0.60)   | -0.06(-0.09,-0.04) | 0.41(0.37,0.44)  | 52  |
| Dominica                           | 0.33(0.27-0.40) | 126 | 0.36(0.29-0.43) | 123 | 0.14(0.13,0.16)    | 0.33(0.29,0.38)   | 0.35(0.26,0.44)    | 0.28(0.25,0.31)  | 73  |
| Dominican Republic                 | 0.36(0.29-0.43) | 117 | 0.39(0.31-0.47) | 111 | -0.08(-0.10,-0.06) | 0.25(0.23,0.27)   | 0.69(0.53,0.86)    | 0.28(0.23,0.33)  | 74  |
| Grenada                            | 0.46(0.38-0.54) | 93  | 0.53(0.44-0.61) | 93  | 1.41(1.31,1.51)    | 0.32(0.23,0.40)   | -0.47(-0.56,-0.37) | 0.41(0.35,0.48)  | 53  |
| Guyana                             | 0.25(0.20-0.30) | 150 | 0.27(0.22-0.33) | 152 | 0.30(0.27,0.34)    | 0.34(0.33,0.35)   | 0.23(0.21,0.25)    | 0.29(0.28,0.31)  | 72  |
| Haiti                              | 0.45(0.37-0.53) | 95  | 0.50(0.41-0.59) | 96  | 0.41(0.36,0.45)    | 0.34(0.33,0.35)   | 0.35(0.31,0.39)    | 0.36(0.34,0.38)  | 62  |
| Jamaica                            | 0.35(0.28-0.42) | 119 | 0.38(0.31-0.46) | 115 | 0.08(0.05,0.11)    | 0.30(0.27,0.32)   | 0.48(0.31,0.66)    | 0.28(0.22,0.34)  | 75  |
| Saint Lucia                        | 0.34(0.28-0.41) | 122 | 0.37(0.30-0.45) | 119 | 0.43(0.39,0.48)    | 0.36(0.32,0.40)   | 0.08(0.07,0.09)    | 0.28(0.26,0.30)  | 76  |
| Saint Vincent and the Grenadines   | 0.33(0.27-0.40) | 127 | 0.37(0.30-0.44) | 120 | 0.45(0.43,0.47)    | 0.46(0.43,0.50)   | 0.27(0.23,0.32)    | 0.39(0.37,0.41)  | 57  |
| Suriname                           | 0.24(0.19-0.29) | 153 | 0.27(0.21-0.32) | 153 | 0.60(0.58,0.62)    | 0.37(0.37,0.38)   | 0.15(0.13,0.16)    | 0.37(0.37,0.38)  | 61  |
| Trinidad and Tobago                | 0.29(0.23-0.35) | 141 | 0.33(0.27-0.39) | 138 | 0.57(0.53,0.61)    | 0.41(0.40,0.43)   | 0.21(0.17,0.26)    | 0.39(0.37,0.41)  | 58  |
| Bolivia (Plurinational State of)   | 0.36(0.29-0.43) | 115 | 0.41(0.33-0.48) | 108 | 0.59(0.56,0.62)    | 0.47(0.47,0.48)   | 0.23(0.19,0.26)    | 0.42(0.40,0.44)  | 51  |
| Ecuador                            | 0.21(0.17-0.25) | 164 | 0.26(0.21-0.30) | 154 | 1.28(1.24,1.32)    | 0.56(0.54,0.57)   | 0.19(0.13,0.25)    | 0.67(0.65,0.69)  | 29  |
| Peru                               | 0.27(0.22-0.32) | 146 | 0.33(0.26-0.39) | 136 | 1.12(1.08,1.16)    | 0.72(0.66,0.78)   | 0.36(0.34,0.38)    | 0.73(0.70,0.75)  | 24  |
| Colombia                           | 0.19(0.16-0.23) | 173 | 0.22(0.18-0.27) | 163 | 1.24(1.11,1.37)    | 0.46(0.38,0.54)   | -0.32(-0.43,-0.21) | 0.46(0.39,0.53)  | 46  |
| Costa Rica                         | 0.29(0.24-0.34) | 140 | 0.34(0.28-0.40) | 129 | 1.37(1.35,1.39)    | 0.72(0.70,0.75)   | -0.59(-0.78,-0.39) | 0.51(0.45,0.57)  | 41  |
| El Salvador                        | 0.24(0.20-0.29) | 152 | 0.28(0.22-0.33) | 149 | 0.63(0.61,0.66)    | 0.43(0.42,0.44)   | 0.34(0.31,0.37)    | 0.46(0.45,0.48)  | 47  |
| Guatemala                          | 0.27(0.22-0.33) | 145 | 0.33(0.27-0.39) | 135 | 0.92(0.88,0.96)    | 0.65(0.61,0.69)   | 0.46(0.44,0.48)    | 0.67(0.65,0.69)  | 30  |
| Honduras                           | 0.26(0.21-0.31) | 149 | 0.29(0.23-0.34) | 146 | 0.40(0.37,0.43)    | 0.37(0.36,0.39)   | 0.36(0.34,0.38)    | 0.38(0.36,0.39)  | 60  |
| Mexico                             | 0.41(0.33-0.48) | 101 | 0.53(0.44-0.62) | 92  | 1.59(1.56,1.63)    | 0.88(0.84,0.91)   | 0.29(0.27,0.31)    | 0.91(0.89,0.93)  | 9   |
| Nicaragua                          | 0.24(0.19-0.28) | 155 | 0.27(0.22-0.32) | 150 | 0.75(0.72,0.77)    | 0.40(0.38,0.42)   | 0.15(0.14,0.17)    | 0.43(0.42,0.45)  | 50  |
| Panama                             | 0.22(0.18-0.26) | 161 | 0.24(0.20-0.28) | 159 | 0.76(0.66,0.87)    | 0.32(0.27,0.38)   | -0.38(-0.46,-0.30) | 0.24(0.19,0.29)  | 81  |
| Venezuela (Bolivarian Republic of) | 0.24(0.20-0.29) | 151 | 0.28(0.23-0.33) | 147 | 1.42(1.28,1.55)    | 0.52(0.42,0.63)   | -0.49(-0.57,-0.40) | 0.49(0.42,0.55)  | 43  |
| Brazil                             | 0.75(0.63-0.88) | 79  | 0.80(0.67-0.94) | 82  | 0.05(-0.04,0.14)   | 0.05(-0.04,0.14)  | 0.03(-0.51,0.57)   | 0.10(-0.10,0.30) | 110 |
| Paraguay                           | 0.60(0.48-0.72) | 87  | 0.63(0.50-0.75) | 89  | -0.46(-0.48,-0.44) | 0.08(0.06,0.10)   | 0.88(0.71,1.06)    | 0.16(0.11,0.22)  | 95  |
| Algeria                            | 1.24(1.02-1.45) | 50  | 1.50(1.26-1.77) | 42  | 0.81(0.76,0.86)    | 0.61(0.60,0.62)   | 0.57(0.56,0.58)    | 0.66(0.64,0.68)  | 31  |
| Bahrain                            | 0.94(0.76-1.12) | 68  | 1.20(0.98-1.45) | 57  | 0.88(0.76,1.01)    | 0.45(0.40,0.50)   | 1.20(1.14,1.27)    | 0.84(0.79,0.90)  | 14  |

|                                  |                 |     |                 |     |                    |                    |                    |                    |     |
|----------------------------------|-----------------|-----|-----------------|-----|--------------------|--------------------|--------------------|--------------------|-----|
| Egypt                            | 0.69(0.56-0.82) | 83  | 0.81(0.66-0.97) | 81  | 0.40(0.23,0.57)    | 0.34(0.28,0.41)    | 0.93(0.88,0.97)    | 0.56(0.50,0.62)    | 37  |
| Iran (Islamic Republic of)       | 2.07(1.78-2.38) | 23  | 1.97(1.71-2.23) | 27  | -1.55(-2.07,-1.02) | 0.44(0.41,0.47)    | 0.44(0.41,0.47)    | -0.18(-0.35,-0.01) | 189 |
| Iraq                             | 1.18(0.94-1.41) | 56  | 1.34(1.08-1.63) | 52  | -0.20(-0.27,-0.13) | 0.46(0.43,0.49)    | 1.10(1.04,1.17)    | 0.46(0.42,0.49)    | 48  |
| Jordan                           | 1.65(1.44-1.86) | 31  | 1.61(1.31-1.92) | 37  | 0.41(0.39,0.43)    | -0.82(-0.89,-0.74) | 0.38(0.31,0.45)    | -0.07(-0.11,-0.04) | 170 |
| Kuwait                           | 1.19(0.99-1.41) | 54  | 1.78(1.49-2.10) | 32  | 2.23(2.11,2.36)    | 1.08(1.05,1.12)    | 0.78(0.69,0.86)    | 1.42(1.36,1.47)    | 3   |
| Lebanon                          | 1.45(1.21-1.71) | 39  | 1.84(1.52-2.16) | 30  | 1.05(1.01,1.09)    | 0.97(0.78,1.16)    | 0.48(0.43,0.52)    | 0.83(0.76,0.89)    | 18  |
| Libya                            | 1.18(0.97-1.39) | 55  | 1.48(1.26-1.73) | 43  | 1.38(1.34,1.42)    | 0.77(0.69,0.84)    | 0.21(0.17,0.25)    | 0.79(0.75,0.82)    | 23  |
| Morocco                          | 1.23(1.00-1.46) | 51  | 1.47(1.23-1.75) | 44  | 0.58(0.53,0.62)    | 0.54(0.43,0.65)    | 0.87(0.78,0.96)    | 0.66(0.61,0.71)    | 32  |
| Palestine                        | 1.26(1.03-1.49) | 47  | 1.46(1.20-1.75) | 46  | 0.45(0.38,0.53)    | 0.43(0.41,0.45)    | 0.69(0.67,0.70)    | 0.52(0.50,0.55)    | 40  |
| Oman                             | 0.97(0.81-1.14) | 65  | 1.24(1.05-1.45) | 55  | 1.88(1.79,1.96)    | 0.60(0.49,0.71)    | 0.11(0.01,0.21)    | 0.84(0.77,0.90)    | 15  |
| Qatar                            | 1.26(1.01-1.52) | 49  | 1.81(1.59-2.04) | 31  | 4.21(4.00,4.42)    | -0.36(-0.45,-0.27) | 0.07(-0.03,0.16)   | 1.20(1.11,1.28)    | 6   |
| Saudi Arabia                     | 0.83(0.67-1.00) | 75  | 1.03(0.82-1.24) | 67  | 0.60(0.53,0.67)    | 0.59(0.53,0.64)    | 0.95(0.93,0.97)    | 0.72(0.69,0.75)    | 26  |
| Syrian Arab Republic             | 1.26(1.02-1.53) | 46  | 1.52(1.23-1.84) | 41  | 0.16(0.01,0.30)    | 0.55(0.51,0.58)    | 1.19(0.99,1.39)    | 0.64(0.56,0.73)    | 33  |
| Tunisia                          | 1.41(1.17-1.68) | 40  | 1.74(1.45-2.06) | 33  | 0.80(0.75,0.85)    | 0.64(0.60,0.67)    | 0.73(0.71,0.74)    | 0.73(0.71,0.75)    | 25  |
| Turkey                           | 1.73(1.64-1.81) | 30  | 1.69(1.61-1.78) | 34  | -0.06(-0.09,-0.03) | -0.09(-0.09,-0.08) | -0.06(-0.11,-0.01) | -0.07(-0.09,-0.05) | 171 |
| United Arab Emirates             | 1.01(0.86-1.17) | 64  | 1.06(0.92-1.20) | 65  | -0.08(-0.25,0.09)  | 0.14(-0.16,0.43)   | 0.39(0.27,0.50)    | 0.18(0.06,0.29)    | 91  |
| Yemen                            | 0.75(0.60-0.90) | 80  | 0.88(0.72-1.05) | 76  | 0.50(0.45,0.56)    | 0.62(0.56,0.68)    | 0.50(0.47,0.54)    | 0.55(0.52,0.58)    | 38  |
| Afghanistan                      | 1.46(1.22-1.70) | 38  | 1.64(1.40-1.90) | 36  | -0.03(-0.09,0.04)  | 0.46(0.44,0.48)    | 0.78(0.76,0.80)    | 0.41(0.39,0.44)    | 54  |
| Bangladesh                       | 0.37(0.30-0.44) | 113 | 0.37(0.30-0.45) | 118 | -0.18(-0.20,-0.16) | 0.14(0.10,0.19)    | 0.24(0.23,0.25)    | 0.06(0.05,0.08)    | 129 |
| Bhutan                           | 0.40(0.32-0.48) | 106 | 0.41(0.33-0.49) | 106 | -0.21(-0.23,-0.19) | 0.10(0.08,0.12)    | 0.51(0.36,0.65)    | 0.13(0.08,0.17)    | 105 |
| India                            | 0.36(0.29-0.43) | 114 | 0.40(0.32-0.47) | 110 | 0.11(0.05,0.16)    | 0.38(0.34,0.41)    | 0.53(0.50,0.56)    | 0.34(0.32,0.37)    | 66  |
| Nepal                            | 0.41(0.34-0.49) | 100 | 0.44(0.36-0.52) | 100 | -0.22(-0.28,-0.16) | 0.23(0.17,0.29)    | 0.68(0.62,0.74)    | 0.23(0.19,0.27)    | 82  |
| Pakistan                         | 0.45(0.36-0.53) | 96  | 0.47(0.39-0.56) | 98  | -0.20(-0.28,-0.12) | 0.25(0.21,0.28)    | 0.56(0.42,0.70)    | 0.21(0.15,0.26)    | 87  |
| Angola                           | 0.28(0.23-0.34) | 143 | 0.29(0.23-0.35) | 144 | -0.26(-0.28,-0.25) | 0.12(0.08,0.15)    | 0.41(0.40,0.42)    | 0.09(0.08,0.10)    | 118 |
| Central African Republic         | 0.24(0.19-0.29) | 154 | 0.25(0.20-0.30) | 157 | -0.22(-0.23,-0.21) | 0.10(0.08,0.12)    | 0.44(0.43,0.45)    | 0.11(0.10,0.11)    | 108 |
| Congo                            | 0.20(0.16-0.24) | 170 | 0.20(0.16-0.25) | 170 | 0.00(-0.03,0.03)   | 0.13(0.10,0.17)    | -0.03(-0.05,0.00)  | 0.04(0.02,0.06)    | 140 |
| Democratic Republic of the Congo | 0.20(0.16-0.24) | 167 | 0.20(0.16-0.25) | 168 | -0.25(-0.29,-0.22) | 0.08(0.07,0.09)    | 0.33(0.30,0.37)    | 0.06(0.04,0.07)    | 130 |
| Equatorial Guinea                | 0.20(0.16-0.24) | 169 | 0.19(0.15-0.23) | 175 | -0.24(-0.29,-0.19) | -0.10(-0.12,-0.09) | -0.06(-0.07,-0.05) | -0.13(-0.15,-0.11) | 187 |
| Gabon                            | 0.19(0.15-0.23) | 175 | 0.20(0.16-0.24) | 171 | 0.14(0.12,0.17)    | 0.27(0.26,0.29)    | 0.05(0.03,0.07)    | 0.16(0.15,0.18)    | 96  |
| Burundi                          | 0.21(0.17-0.26) | 162 | 0.21(0.17-0.26) | 167 | -0.43(-0.47,-0.39) | -0.11(-0.12,-0.09) | 0.41(0.37,0.45)    | -0.05(-0.07,-0.03) | 161 |
| Comoros                          | 0.29(0.23-0.35) | 142 | 0.29(0.23-0.35) | 145 | -0.26(-0.29,-0.23) | 0.00(-0.04,0.04)   | 0.32(0.27,0.37)    | 0.02(0.00,0.04)    | 144 |
| Djibouti                         | 0.28(0.22-0.33) | 144 | 0.28(0.22-0.34) | 148 | -0.29(-0.33,-0.25) | 0.15(0.13,0.18)    | 0.34(0.32,0.35)    | 0.06(0.04,0.08)    | 131 |
| Eritrea                          | 0.33(0.27-0.40) | 128 | 0.33(0.27-0.40) | 131 | -0.35(-0.43,-0.27) | -0.01(-0.04,0.03)  | 0.48(0.41,0.55)    | 0.04(0.00,0.08)    | 141 |
| Ethiopia                         | 0.26(0.21-0.32) | 147 | 0.25(0.20-0.31) | 155 | -0.81(-0.84,-0.77) | -0.07(-0.12,-0.02) | 0.56(0.51,0.61)    | -0.10(-0.13,-0.07) | 178 |
| Kenya                            | 0.21(0.17-0.25) | 165 | 0.21(0.17-0.26) | 165 | -0.17(-0.17,-0.16) | 0.15(0.14,0.17)    | 0.38(0.36,0.39)    | 0.12(0.11,0.12)    | 106 |
| Madagascar                       | 0.35(0.28-0.43) | 118 | 0.36(0.29-0.44) | 124 | -0.44(-0.45,-0.42) | -0.03(-0.05,-0.01) | 0.71(0.56,0.85)    | 0.08(0.03,0.12)    | 121 |
| Malawi                           | 0.29(0.24-0.36) | 138 | 0.30(0.24-0.36) | 142 | -0.44(-0.48,-0.41) | 0.10(0.00,0.20)    | 0.58(0.52,0.65)    | 0.07(0.03,0.11)    | 125 |
| Mauritius                        | 0.21(0.17-0.26) | 163 | 0.21(0.17-0.26) | 166 | -0.30(-0.36,-0.24) | -0.02(-0.04,0.01)  | 0.32(0.28,0.35)    | 0.00(-0.02,0.03)   | 149 |

|                             |                 |     |                 |     |                    |                    |                    |                    |     |
|-----------------------------|-----------------|-----|-----------------|-----|--------------------|--------------------|--------------------|--------------------|-----|
| Mozambique                  | 0.35(0.28-0.42) | 121 | 0.35(0.29-0.42) | 126 | -0.37(-0.39,-0.34) | 0.06(0.03,0.09)    | 0.58(0.35,0.82)    | 0.09(0.01,0.16)    | 119 |
| Rwanda                      | 0.21(0.16-0.25) | 166 | 0.20(0.16-0.25) | 169 | -0.13(-0.24,-0.02) | -0.09(-0.10,-0.07) | 0.02(0.01,0.03)    | -0.07(-0.10,-0.03) | 172 |
| Seychelles                  | 0.19(0.15-0.22) | 181 | 0.19(0.16-0.22) | 179 | 0.77(0.74,0.80)    | 0.05(0.02,0.08)    | -0.81(-1.04,-0.57) | 0.01(-0.06,0.09)   | 146 |
| Somalia                     | 0.23(0.18-0.28) | 156 | 0.24(0.19-0.29) | 161 | -0.34(-0.36,-0.32) | 0.05(-0.01,0.12)   | 0.43(0.31,0.54)    | 0.05(0.01,0.09)    | 136 |
| United Republic of Tanzania | 0.23(0.18-0.28) | 158 | 0.23(0.19-0.29) | 162 | -0.29(-0.31,-0.27) | 0.08(0.02,0.13)    | 0.41(0.38,0.45)    | 0.06(0.04,0.09)    | 132 |
| Uganda                      | 0.19(0.15-0.23) | 177 | 0.19(0.15-0.24) | 174 | -0.23(-0.25,-0.22) | 0.07(0.03,0.12)    | 0.46(0.38,0.55)    | 0.10(0.07,0.13)    | 111 |
| Zambia                      | 0.31(0.25-0.38) | 134 | 0.31(0.25-0.37) | 140 | -0.33(-0.36,-0.30) | 0.01(-0.03,0.04)   | 0.22(0.17,0.27)    | -0.03(-0.06,-0.01) | 154 |
| Botswana                    | 0.32(0.26-0.39) | 132 | 0.33(0.26-0.40) | 134 | -0.29(-0.30,-0.28) | 0.05(0.00,0.10)    | 0.48(0.47,0.49)    | 0.08(0.06,0.10)    | 122 |
| Lesotho                     | 0.40(0.33-0.49) | 104 | 0.42(0.34-0.51) | 102 | -0.40(-0.41,-0.39) | 0.08(0.06,0.09)    | 0.74(0.63,0.86)    | 0.14(0.10,0.18)    | 101 |
| Namibia                     | 0.33(0.26-0.39) | 130 | 0.33(0.26-0.40) | 137 | -0.35(-0.36,-0.33) | -0.02(-0.02,-0.01) | 0.40(0.39,0.42)    | 0.01(0.00,0.02)    | 147 |
| South Africa                | 0.39(0.32-0.47) | 107 | 0.40(0.32-0.48) | 109 | -0.55(-0.58,-0.53) | 0.07(-0.04,0.17)   | 0.58(0.50,0.66)    | 0.03(-0.01,0.07)   | 143 |
| Eswatini                    | 0.38(0.30-0.46) | 111 | 0.39(0.31-0.47) | 112 | -0.38(-0.39,-0.37) | 0.05(0.04,0.06)    | 0.63(0.53,0.73)    | 0.10(0.07,0.13)    | 112 |
| Zimbabwe                    | 0.29(0.23-0.35) | 139 | 0.31(0.25-0.38) | 139 | -0.07(-0.08,-0.07) | 0.18(0.17,0.19)    | 0.50(0.45,0.55)    | 0.20(0.19,0.22)    | 89  |
| Benin                       | 0.35(0.28-0.42) | 120 | 0.36(0.29-0.42) | 125 | -0.03(-0.04,-0.01) | 0.19(0.17,0.20)    | 0.04(0.00,0.09)    | 0.07(0.05,0.08)    | 126 |
| Burkina Faso                | 0.38(0.31-0.45) | 110 | 0.38(0.31-0.46) | 114 | -0.26(-0.29,-0.22) | 0.13(0.12,0.14)    | 0.23(0.19,0.26)    | 0.04(0.02,0.05)    | 142 |
| Cameroon                    | 0.32(0.26-0.39) | 131 | 0.33(0.27-0.40) | 132 | 0.21(0.19,0.22)    | 0.18(0.16,0.19)    | -0.09(-0.23,0.04)  | 0.10(0.05,0.14)    | 113 |
| Cabo Verde                  | 0.38(0.31-0.46) | 108 | 0.39(0.32-0.47) | 113 | -0.26(-0.30,-0.22) | 0.14(0.04,0.23)    | 0.31(0.28,0.34)    | 0.06(0.03,0.10)    | 133 |
| Chad                        | 0.41(0.33-0.49) | 102 | 0.42(0.34-0.50) | 103 | -0.26(-0.28,-0.24) | 0.16(0.12,0.20)    | 0.39(0.38,0.40)    | 0.10(0.08,0.11)    | 114 |
| Cote d'Ivoire               | 0.33(0.27-0.39) | 129 | 0.34(0.28-0.41) | 128 | 0.20(0.19,0.21)    | 0.27(0.25,0.28)    | -0.08(-0.13,-0.04) | 0.14(0.12,0.15)    | 102 |
| Gambia                      | 0.38(0.31-0.45) | 112 | 0.41(0.33-0.48) | 107 | 0.14(0.12,0.16)    | 0.37(0.36,0.39)    | 0.31(0.26,0.35)    | 0.28(0.27,0.30)    | 77  |
| Ghana                       | 0.65(0.56-0.74) | 85  | 0.99(0.89-1.09) | 70  | 2.62(2.52,2.73)    | 1.09(1.04,1.13)    | 0.67(0.59,0.75)    | 1.44(1.39,1.49)    | 2   |
| Guinea                      | 0.36(0.29-0.43) | 116 | 0.38(0.31-0.45) | 116 | 0.00(-0.05,0.05)   | 0.32(0.30,0.35)    | 0.22(0.20,0.25)    | 0.18(0.16,0.20)    | 92  |
| Guinea-Bissau               | 0.41(0.33-0.48) | 103 | 0.41(0.34-0.49) | 105 | -0.05(-0.05,-0.04) | 0.19(0.18,0.20)    | 0.08(0.06,0.09)    | 0.06(0.06,0.07)    | 134 |
| Liberia                     | 0.30(0.24-0.36) | 137 | 0.31(0.25-0.36) | 141 | -0.15(-0.20,-0.09) | 0.11(0.09,0.13)    | 0.24(0.22,0.26)    | 0.07(0.05,0.09)    | 127 |
| Mali                        | 0.43(0.35-0.51) | 98  | 0.44(0.36-0.52) | 99  | -0.32(-0.34,-0.31) | 0.16(0.13,0.19)    | 0.34(0.31,0.37)    | 0.05(0.04,0.07)    | 137 |
| Mauritania                  | 0.49(0.40-0.58) | 92  | 0.50(0.42-0.59) | 95  | -0.08(-0.10,-0.06) | 0.16(0.15,0.18)    | 0.20(0.15,0.26)    | 0.09(0.07,0.11)    | 120 |
| Niger                       | 0.43(0.35-0.51) | 99  | 0.43(0.35-0.51) | 101 | -0.38(-0.40,-0.35) | 0.15(0.11,0.19)    | 0.38(0.33,0.43)    | 0.06(0.03,0.08)    | 135 |
| Nigeria                     | 0.31(0.25-0.38) | 135 | 0.34(0.27-0.40) | 130 | -0.14(-0.19,-0.09) | 0.34(0.31,0.37)    | 0.62(0.56,0.68)    | 0.28(0.25,0.31)    | 78  |
| Sao Tome and Principe       | 0.23(0.19-0.28) | 157 | 0.24(0.19-0.29) | 158 | 0.11(0.09,0.13)    | 0.29(0.28,0.30)    | 0.05(0.01,0.10)    | 0.15(0.14,0.17)    | 99  |
| Senegal                     | 0.40(0.33-0.47) | 105 | 0.41(0.34-0.49) | 104 | -0.01(-0.05,0.02)  | 0.20(0.19,0.22)    | 0.24(0.23,0.25)    | 0.14(0.13,0.16)    | 103 |
| Sierra Leone                | 0.32(0.25-0.38) | 133 | 0.33(0.27-0.40) | 133 | 0.09(0.05,0.12)    | 0.14(0.11,0.18)    | 0.30(0.25,0.36)    | 0.17(0.15,0.20)    | 94  |
| Togo                        | 0.34(0.28-0.40) | 124 | 0.35(0.29-0.42) | 127 | 0.04(0.03,0.05)    | 0.26(0.25,0.28)    | 0.04(0.00,0.09)    | 0.12(0.11,0.13)    | 107 |
| American Samoa              | 0.16(0.13-0.19) | 189 | 0.16(0.13-0.19) | 188 | -0.17(-0.20,-0.14) | 0.00(-0.01,0.01)   | 0.13(0.11,0.16)    | -0.01(-0.03,0.00)  | 151 |
| Bermuda                     | 0.62(0.51-0.72) | 86  | 0.66(0.55-0.78) | 88  | 0.36(0.28,0.44)    | 0.31(0.24,0.38)    | 0.11(0.08,0.13)    | 0.25(0.22,0.29)    | 80  |
| Cook Islands                | 0.19(0.16-0.23) | 174 | 0.19(0.15-0.23) | 177 | -0.17(-0.18,-0.16) | -0.02(-0.02,-0.01) | 0.13(0.11,0.15)    | -0.02(-0.02,-0.01) | 153 |
| Greenland                   | 2.34(1.92-2.80) | 19  | 2.55(2.08-3.07) | 21  | -0.61(-0.63,-0.59) | 0.16(0.14,0.18)    | 1.40(1.21,1.59)    | 0.31(0.25,0.37)    | 70  |
| Guam                        | 0.15(0.12-0.18) | 196 | 0.14(0.11-0.18) | 194 | -0.16(-0.19,-0.14) | -0.03(-0.04,-0.02) | 0.10(0.07,0.13)    | -0.03(-0.05,-0.02) | 155 |
| Monaco                      | 1.74(1.49-2.00) | 29  | 2.07(1.79-2.38) | 25  | 0.47(0.45,0.48)    | 0.70(0.59,0.81)    | 0.62(0.54,0.71)    | 0.60(0.55,0.64)    | 35  |

|                                       |                    |     |                    |     |                    |                    |                    |                    |     |
|---------------------------------------|--------------------|-----|--------------------|-----|--------------------|--------------------|--------------------|--------------------|-----|
| Nauru                                 | 0.11(0.09-0.13)    | 204 | 0.11(0.09-0.13)    | 204 | 0.28(0.28,0.29)    | 0.02(0.01,0.03)    | -0.44(-0.50,-0.38) | -0.04(-0.06,-0.03) | 158 |
| Niue                                  | 0.19(0.16-0.23)    | 172 | 0.19(0.15-0.23)    | 178 | -0.18(-0.22,-0.15) | -0.09(-0.12,-0.06) | 0.10(0.09,0.11)    | -0.05(-0.07,-0.04) | 162 |
| Northern Mariana Islands              | 0.17(0.14-0.21)    | 184 | 0.17(0.14-0.21)    | 184 | 0.11(0.00,0.21)    | -0.16(-0.18,-0.15) | -0.16(-0.18,-0.15) | -0.06(-0.10,-0.02) | 167 |
| Palau                                 | 0.14(0.11-0.16)    | 198 | 0.13(0.11-0.16)    | 198 | 0.03(0.00,0.07)    | 0.04(-0.05,0.14)   | -0.36(-0.42,-0.30) | -0.09(-0.13,-0.05) | 174 |
| Puerto Rico                           | 0.45(0.37-0.53)    | 94  | 0.52(0.43-0.61)    | 94  | 1.07(0.99,1.14)    | 0.43(0.41,0.46)    | -0.06(-0.08,-0.03) | 0.47(0.44,0.50)    | 45  |
| Saint Kitts and Nevis                 | 0.73(0.62-0.84)    | 82  | 0.79(0.67-0.90)    | 83  | 1.21(1.19,1.23)    | 0.32(0.30,0.34)    | -0.84(-1.02,-0.65) | 0.22(0.16,0.28)    | 85  |
| San Marino                            | 1.35(1.09-1.60)    | 42  | 1.46(1.19-1.74)    | 47  | -0.31(-0.34,-0.28) | 0.21(0.18,0.24)    | 1.01(0.77,1.25)    | 0.30(0.22,0.37)    | 71  |
| Tokelau                               | 0.14(0.11-0.17)    | 197 | 0.13(0.11-0.16)    | 197 | -0.16(-0.22,-0.09) | -0.19(-0.27,-0.10) | -0.03(-0.05,-0.01) | -0.12(-0.15,-0.08) | 182 |
| Tuvalu                                | 0.13(0.11-0.16)    | 199 | 0.13(0.10-0.15)    | 199 | -0.22(-0.24,-0.20) | -0.09(-0.09,-0.08) | -0.13(-0.18,-0.07) | -0.14(-0.16,-0.12) | 188 |
| United States Virgin Islands          | 0.44(0.36-0.51)    | 97  | 0.49(0.40-0.57)    | 97  | 0.81(0.75,0.86)    | 0.43(0.38,0.48)    | -0.06(-0.07,-0.04) | 0.39(0.36,0.41)    | 59  |
| South Sudan                           | 0.23(0.18-0.28)    | 159 | 0.24(0.19-0.29)    | 160 | -0.19(-0.22,-0.16) | 0.13(0.10,0.16)    | 0.64(0.41,0.87)    | 0.19(0.11,0.26)    | 90  |
| Sudan                                 | 0.74(0.60-0.89)    | 81  | 0.87(0.71-1.03)    | 78  | 0.53(0.48,0.58)    | 0.45(0.42,0.49)    | 0.59(0.57,0.60)    | 0.53(0.51,0.55)    | 39  |
| <i>Rheumatoid arthritis</i>           |                    |     |                    |     |                    |                    |                    |                    |     |
| China                                 | 11.45(10.31-12.71) | 64  | 11.74(10.59-12.96) | 89  | 0.28(0.27,0.29)    | 0.39(0.38,0.40)    | -0.54(-0.62,-0.45) | 0.08(0.05,0.11)    | 188 |
| Democratic People's Republic of Korea | 10.92(9.71-12.23)  | 69  | 9.86(8.72-11.08)   | 107 | -0.76(-0.91,-0.61) | -0.25(-0.38,-0.12) | -0.07(-0.18,0.04)  | -0.37(-0.45,-0.29) | 203 |
| Taiwan (Province of China)            | 10.13(9.91-10.43)  | 83  | 10.44(10.23-10.70) | 104 | 0.18(0.18,0.18)    | 0.18(0.18,0.18)    | -0.06(-0.11,-0.01) | 0.11(0.09,0.12)    | 187 |
| Cambodia                              | 4.37(3.84-5.03)    | 148 | 5.19(4.58-5.93)    | 148 | 0.23(0.10,0.36)    | 0.89(0.75,1.03)    | 0.65(0.62,0.68)    | 0.59(0.52,0.66)    | 103 |
| Indonesia                             | 4.02(3.59-4.52)    | 175 | 4.07(3.63-4.55)    | 200 | -0.07(-0.09,-0.05) | 0.04(0.02,0.05)    | 0.18(0.13,0.23)    | 0.04(0.03,0.06)    | 191 |
| Lao People's Democratic Republic      | 4.24(3.69-4.87)    | 154 | 5.02(4.40-5.76)    | 155 | 0.18(0.12,0.24)    | 0.71(0.68,0.74)    | 0.85(0.83,0.86)    | 0.58(0.56,0.61)    | 106 |
| Malaysia                              | 4.06(3.49-4.70)    | 169 | 4.77(4.07-5.57)    | 173 | 0.36(0.31,0.41)    | 0.67(0.64,0.69)    | 0.68(0.62,0.74)    | 0.58(0.55,0.61)    | 107 |
| Maldives                              | 4.74(4.16-5.49)    | 140 | 5.86(5.10-6.77)    | 138 | 1.04(0.76,1.33)    | 1.60(1.51,1.69)    | -0.71(-0.93,-0.48) | 0.71(0.59,0.83)    | 82  |
| Myanmar                               | 5.02(4.43-5.70)    | 138 | 6.21(5.52-7.05)    | 135 | 0.26(0.22,0.29)    | 0.93(0.90,0.95)    | 0.99(0.96,1.02)    | 0.74(0.72,0.76)    | 75  |
| Philippines                           | 5.81(5.18-6.47)    | 131 | 5.57(4.98-6.22)    | 141 | -0.06(-0.10,-0.02) | -0.06(-0.10,-0.02) | -0.15(-0.49,0.19)  | -0.09(-0.20,0.02)  | 196 |
| Sri Lanka                             | 4.04(3.46-4.72)    | 173 | 4.76(4.09-5.53)    | 176 | 0.13(0.11,0.15)    | 0.91(0.88,0.94)    | 0.65(0.60,0.70)    | 0.56(0.54,0.58)    | 118 |
| Thailand                              | 8.50(7.46-9.67)    | 107 | 9.60(8.37-10.98)   | 109 | 0.63(0.37,0.89)    | 1.18(1.13,1.24)    | -0.73(-1.48,0.02)  | 0.41(0.16,0.66)    | 144 |
| Timor-Leste                           | 4.08(3.55-4.68)    | 165 | 4.83(4.22-5.52)    | 170 | 0.36(0.31,0.41)    | 0.81(0.79,0.82)    | 0.57(0.54,0.61)    | 0.58(0.56,0.61)    | 108 |
| Viet Nam                              | 4.51(3.93-5.17)    | 145 | 5.63(4.88-6.48)    | 140 | 0.51(0.48,0.54)    | 0.90(0.88,0.92)    | 0.88(0.83,0.94)    | 0.77(0.75,0.79)    | 66  |
| Fiji                                  | 3.71(3.13-4.37)    | 194 | 4.04(3.41-4.79)    | 201 | 0.01(-0.21,0.23)   | 0.12(0.07,0.17)    | 0.90(0.77,1.02)    | 0.33(0.24,0.41)    | 160 |
| Kiribati                              | 3.27(2.78-3.82)    | 202 | 3.47(2.96-4.10)    | 204 | 0.16(0.04,0.27)    | 0.06(0.01,0.10)    | 0.52(0.41,0.64)    | 0.24(0.18,0.30)    | 175 |
| Marshall Islands                      | 4.25(3.71-4.89)    | 153 | 4.63(4.04-5.34)    | 181 | 0.03(-0.11,0.16)   | 0.36(0.34,0.39)    | 0.48(0.40,0.55)    | 0.29(0.24,0.34)    | 168 |
| Micronesia (Federated States of)      | 4.11(3.57-4.76)    | 164 | 4.77(4.14-5.49)    | 175 | 0.67(0.63,0.71)    | 0.45(0.27,0.64)    | 0.39(0.33,0.45)    | 0.49(0.43,0.56)    | 129 |
| Papua New Guinea                      | 3.51(3.04-4.05)    | 197 | 3.76(3.26-4.34)    | 202 | 0.32(0.29,0.34)    | -0.04(-0.08,0.00)  | 0.43(0.39,0.47)    | 0.24(0.21,0.26)    | 176 |
| Samoa                                 | 4.36(3.79-5.05)    | 149 | 4.74(4.10-5.49)    | 178 | 0.61(0.49,0.74)    | -0.11(-0.15,-0.07) | 0.42(0.30,0.53)    | 0.31(0.24,0.37)    | 163 |
| Solomon Islands                       | 4.39(3.87-4.99)    | 147 | 4.94(4.34-5.67)    | 161 | 0.74(0.68,0.80)    | -0.06(-0.14,0.02)  | 0.52(0.47,0.57)    | 0.42(0.38,0.45)    | 142 |
| Tonga                                 | 4.04(3.46-4.70)    | 171 | 4.41(3.79-5.14)    | 192 | 0.45(0.31,0.60)    | -0.01(-0.06,0.04)  | 0.50(0.39,0.62)    | 0.31(0.24,0.38)    | 164 |
| Vanuatu                               | 4.03(3.50-4.64)    | 174 | 4.30(3.74-4.97)    | 195 | 0.33(0.24,0.43)    | -0.12(-0.21,-0.03) | 0.40(0.38,0.43)    | 0.22(0.18,0.27)    | 177 |
| Armenia                               | 6.11(5.35-7.01)    | 127 | 8.22(7.23-9.43)    | 118 | 0.74(0.56,0.92)    | 1.16(1.10,1.21)    | 1.27(0.97,1.57)    | 1.06(0.95,1.18)    | 20  |
| Azerbaijan                            | 5.57(4.77-6.50)    | 134 | 6.91(5.94-8.03)    | 133 | -0.30(-0.56,-0.04) | 0.92(0.81,1.03)    | 1.73(1.49,1.97)    | 0.79(0.66,0.92)    | 60  |

|                        |                    |     |                    |     |                    |                 |                    |                    |     |
|------------------------|--------------------|-----|--------------------|-----|--------------------|-----------------|--------------------|--------------------|-----|
| Georgia                | 7.10(6.02-8.26)    | 116 | 7.73(6.58-8.94)    | 124 | -0.27(-0.54,0.00)  | 0.14(0.06,0.22) | 1.15(0.97,1.34)    | 0.34(0.23,0.45)    | 159 |
| Kazakhstan             | 19.25(17.65-21.07) | 13  | 25.50(23.45-28.01) | 3   | -0.22(-0.29,-0.15) | 1.30(1.28,1.33) | 1.80(1.69,1.91)    | 0.99(0.94,1.03)    | 26  |
| Kyrgyzstan             | 14.74(13.20-16.46) | 33  | 19.04(17.13-21.25) | 28  | 0.30(0.18,0.42)    | 1.02(0.96,1.08) | 1.35(1.30,1.40)    | 0.90(0.85,0.95)    | 40  |
| Mongolia               | 7.29(6.35-8.33)    | 114 | 9.49(8.26-10.82)   | 110 | -0.04(-0.13,0.06)  | 1.90(1.84,1.96) | 0.97(0.93,1.01)    | 0.94(0.90,0.98)    | 34  |
| Tajikistan             | 9.66(8.53-10.96)   | 93  | 11.44(10.07-13.08) | 97  | 0.45(0.43,0.47)    | 0.60(0.59,0.62) | 0.70(0.66,0.73)    | 0.58(0.57,0.59)    | 109 |
| Turkmenistan           | 5.50(4.76-6.35)    | 135 | 6.91(6.03-7.90)    | 132 | 0.24(0.03,0.44)    | 0.68(0.52,0.84) | 1.44(1.38,1.50)    | 0.82(0.73,0.91)    | 52  |
| Uzbekistan             | 17.41(15.70-19.16) | 20  | 20.49(18.48-22.59) | 23  | 0.08(0.01,0.15)    | 0.87(0.77,0.96) | 0.68(0.63,0.74)    | 0.58(0.53,0.62)    | 110 |
| Albania                | 6.17(5.35-7.06)    | 123 | 8.69(7.57-9.93)    | 115 | 1.02(0.94,1.09)    | 1.32(1.22,1.42) | 1.25(0.99,1.52)    | 1.20(1.10,1.29)    | 13  |
| Bosnia and Herzegovina | 10.04(8.94-11.11)  | 85  | 13.12(11.69-14.64) | 71  | 0.77(0.48,1.06)    | 1.08(0.88,1.28) | 0.77(0.68,0.86)    | 0.95(0.82,1.07)    | 32  |
| Bulgaria               | 5.96(5.14-6.90)    | 129 | 6.74(5.84-7.81)    | 134 | -0.18(-0.32,-0.04) | 0.43(0.38,0.49) | 1.15(1.05,1.25)    | 0.46(0.39,0.52)    | 135 |
| Croatia                | 10.17(9.04-11.52)  | 80  | 12.97(11.49-14.74) | 73  | 0.98(0.97,1.00)    | 0.77(0.76,0.79) | 0.79(0.69,0.89)    | 0.85(0.81,0.88)    | 43  |
| Czechia                | 7.74(6.71-8.75)    | 112 | 9.48(8.25-10.78)   | 111 | 0.71(0.37,1.05)    | 0.53(0.48,0.58) | 0.98(0.86,1.11)    | 0.72(0.61,0.84)    | 79  |
| Hungary                | 10.24(9.31-11.29)  | 77  | 11.62(10.53-12.85) | 94  | 0.96(0.90,1.01)    | 0.58(0.53,0.63) | -0.24(-0.60,0.12)  | 0.45(0.33,0.57)    | 139 |
| North Macedonia        | 5.61(4.84-6.53)    | 133 | 7.03(6.06-8.13)    | 131 | 0.50(0.38,0.62)    | 0.90(0.86,0.95) | 1.00(0.76,1.23)    | 0.81(0.72,0.89)    | 56  |
| Montenegro             | 6.92(5.97-7.97)    | 118 | 8.18(7.11-9.39)    | 119 | -0.14(-0.27,-0.02) | 0.85(0.81,0.89) | 1.11(1.00,1.23)    | 0.60(0.54,0.67)    | 100 |
| Poland                 | 19.26(17.25-21.35) | 12  | 16.02(14.29-17.76) | 46  | -0.33(-0.41,-0.26) | 0.12(0.11,0.14) | -1.90(-2.11,-1.69) | -0.65(-0.72,-0.58) | 204 |
| Romania                | 5.86(5.01-6.79)    | 130 | 7.43(6.42-8.57)    | 127 | 0.64(0.47,0.81)    | 0.69(0.64,0.74) | 1.20(1.09,1.32)    | 0.85(0.78,0.92)    | 44  |
| Serbia                 | 6.45(5.94-7.05)    | 120 | 9.05(7.94-10.27)   | 114 | 0.57(0.52,0.62)    | 0.57(0.52,0.62) | 2.81(1.71,3.92)    | 1.26(0.92,1.60)    | 7   |
| Slovakia               | 6.01(5.20-6.90)    | 128 | 7.36(6.36-8.42)    | 128 | 0.51(0.47,0.54)    | 0.62(0.57,0.66) | 1.07(0.75,1.39)    | 0.72(0.62,0.83)    | 80  |
| Slovenia               | 12.24(10.85-13.85) | 59  | 15.60(13.92-17.70) | 47  | 0.72(0.70,0.74)    | 1.18(1.14,1.21) | 0.62(0.56,0.68)    | 0.84(0.81,0.86)    | 46  |
| Belarus                | 4.79(4.12-5.60)    | 139 | 6.17(5.33-7.14)    | 137 | 0.05(-0.10,0.21)   | 1.02(0.93,1.10) | 1.62(1.55,1.70)    | 0.91(0.84,0.98)    | 39  |
| Estonia                | 13.85(12.54-15.11) | 44  | 16.91(15.45-18.42) | 40  | 0.35(0.18,0.53)    | 1.58(1.51,1.65) | -0.11(-0.45,0.24)  | 0.67(0.55,0.80)    | 89  |
| Latvia                 | 12.16(10.92-13.54) | 60  | 14.42(12.92-16.06) | 59  | 0.15(-0.02,0.32)   | 1.02(0.97,1.07) | 0.46(0.34,0.58)    | 0.60(0.53,0.68)    | 101 |
| Lithuania              | 13.27(12.07-14.66) | 49  | 14.95(13.43-16.48) | 54  | 0.48(0.02,0.93)    | 0.57(0.48,0.65) | 0.16(-0.07,0.39)   | 0.41(0.25,0.58)    | 145 |
| Republic of Moldova    | 5.11(4.45-5.92)    | 137 | 6.18(5.38-7.10)    | 136 | -0.06(-0.20,0.08)  | 0.72(0.68,0.76) | 1.41(1.31,1.50)    | 0.69(0.63,0.74)    | 87  |
| Russian Federation     | 7.78(6.98-8.68)    | 111 | 8.11(7.29-9.05)    | 120 | 0.09(0.05,0.13)    | 0.28(0.26,0.29) | 0.04(0.01,0.06)    | 0.14(0.12,0.16)    | 185 |
| Ukraine                | 5.16(4.59-5.78)    | 136 | 5.42(4.82-6.12)    | 143 | 0.29(0.15,0.43)    | 0.06(0.00,0.12) | 0.26(-0.15,0.68)   | 0.19(0.05,0.33)    | 181 |
| Brunei Darussalam      | 9.09(8.09-10.29)   | 101 | 10.74(9.56-12.15)  | 103 | 1.00(0.97,1.03)    | 0.67(0.64,0.71) | 0.08(-0.19,0.35)   | 0.59(0.50,0.68)    | 104 |
| Japan                  | 15.32(13.75-16.98) | 28  | 14.81(13.23-16.41) | 56  | -0.21(-0.55,0.13)  | 0.21(0.06,0.35) | -0.63(-1.69,0.43)  | -0.19(-0.54,0.17)  | 200 |
| Republic of Korea      | 10.46(9.54-11.50)  | 74  | 13.43(12.25-14.69) | 68  | 1.31(1.29,1.34)    | 1.12(1.09,1.15) | 0.07(-0.17,0.31)   | 0.84(0.77,0.92)    | 47  |
| Singapore              | 6.81(5.86-7.83)    | 119 | 8.37(7.14-9.67)    | 117 | 0.46(0.40,0.52)    | 0.93(0.89,0.97) | 0.79(0.71,0.87)    | 0.74(0.70,0.78)    | 76  |
| Australia              | 18.30(16.41-20.50) | 16  | 20.56(18.26-23.09) | 21  | 0.97(0.95,1.00)    | 0.73(0.70,0.76) | -0.58(-0.80,-0.36) | 0.40(0.32,0.47)    | 147 |
| New Zealand            | 23.30(20.74-26.06) | 5   | 22.59(20.14-25.12) | 7   | -0.01(-0.16,0.15)  | 0.07(0.01,0.12) | -0.51(-0.62,-0.39) | -0.13(-0.20,-0.06) | 198 |
| Andorra                | 14.59(12.88-16.72) | 35  | 16.32(14.42-18.62) | 43  | 0.96(0.77,1.15)    | 0.33(0.27,0.38) | -0.29(-0.42,-0.16) | 0.37(0.29,0.45)    | 154 |
| Austria                | 12.31(11.06-13.84) | 56  | 13.00(11.60-14.66) | 72  | 0.68(0.55,0.81)    | 0.43(0.33,0.53) | -0.71(-0.95,-0.48) | 0.16(0.06,0.26)    | 184 |
| Belgium                | 12.95(11.63-14.54) | 52  | 14.71(13.15-16.64) | 57  | 0.63(0.53,0.74)    | 0.59(0.54,0.63) | -0.01(-0.10,0.09)  | 0.42(0.37,0.48)    | 143 |
| Cyprus                 | 17.02(15.24-19.05) | 22  | 21.63(19.31-24.50) | 10  | 0.87(0.79,0.96)    | 1.66(1.54,1.77) | -0.12(-0.31,0.07)  | 0.80(0.72,0.88)    | 57  |
| Denmark                | 17.82(16.37-19.58) | 18  | 20.66(18.87-22.97) | 19  | 0.48(0.46,0.50)    | 0.72(0.71,0.73) | 0.33(0.30,0.36)    | 0.51(0.50,0.53)    | 125 |



|                                  |                    |     |                    |     |                    |                    |                    |                    |     |
|----------------------------------|--------------------|-----|--------------------|-----|--------------------|--------------------|--------------------|--------------------|-----|
| Finland                          | 24.97(23.04-27.10) | 4   | 27.89(25.50-30.76) | 2   | 0.86(0.83,0.90)    | 0.86(0.83,0.90)    | -0.67(-1.28,-0.04) | 0.39(0.19,0.58)    | 150 |
| France                           | 11.70(10.51-12.99) | 61  | 13.70(12.15-15.43) | 66  | 0.70(0.63,0.78)    | 0.81(0.75,0.87)    | 0.02(-0.08,0.12)   | 0.53(0.48,0.58)    | 123 |
| Germany                          | 11.10(9.90-12.46)  | 67  | 12.18(10.72-13.90) | 84  | 0.80(0.75,0.86)    | 0.50(0.45,0.55)    | -0.47(-0.60,-0.34) | 0.30(0.24,0.35)    | 166 |
| Greece                           | 10.38(9.24-11.64)  | 75  | 11.50(10.24-12.91) | 96  | 0.30(0.22,0.39)    | 0.38(0.34,0.42)    | 0.47(0.38,0.57)    | 0.38(0.34,0.43)    | 153 |
| Iceland                          | 12.30(10.94-13.92) | 57  | 13.33(11.76-15.17) | 69  | 0.67(0.56,0.78)    | 0.44(0.38,0.50)    | -0.38(-0.47,-0.29) | 0.26(0.21,0.32)    | 171 |
| Ireland                          | 25.42(23.17-27.84) | 3   | 30.03(26.97-33.31) | 1   | 1.09(1.06,1.13)    | 1.09(1.06,1.13)    | -0.49(-1.17,0.19)  | 0.60(0.38,0.81)    | 102 |
| Israel                           | 9.56(8.36-10.94)   | 97  | 11.43(9.99-13.08)  | 98  | 0.62(0.54,0.70)    | 0.72(0.67,0.77)    | 0.58(0.49,0.67)    | 0.64(0.59,0.69)    | 94  |
| Italy                            | 13.96(12.52-15.45) | 43  | 13.81(12.40-15.31) | 65  | -0.03(-0.05,-0.02) | -0.07(-0.07,-0.06) | -0.01(-0.02,0.00)  | -0.03(-0.04,-0.03) | 193 |
| Luxembourg                       | 10.88(9.64-12.31)  | 70  | 12.33(10.93-13.91) | 80  | 0.89(0.85,0.92)    | 0.69(0.65,0.74)    | -0.27(-0.62,0.07)  | 0.45(0.33,0.56)    | 140 |
| Malta                            | 10.36(9.26-11.74)  | 76  | 11.62(10.31-13.15) | 95  | 0.77(0.73,0.81)    | 0.55(0.51,0.59)    | -0.12(-0.41,0.17)  | 0.41(0.32,0.51)    | 146 |
| Netherlands                      | 21.03(18.95-23.46) | 7   | 20.67(18.57-23.21) | 18  | 0.67(0.59,0.75)    | 0.67(0.59,0.75)    | -1.75(-2.22,-1.28) | -0.09(-0.25,0.07)  | 197 |
| Norway                           | 22.14(19.80-24.66) | 6   | 21.74(19.41-24.23) | 9   | 0.02(-0.03,0.06)   | 0.02(-0.03,0.06)   | -0.14(-1.02,0.74)  | -0.03(-0.31,0.24)  | 194 |
| Portugal                         | 9.81(8.82-10.91)   | 89  | 12.45(11.15-13.83) | 77  | 1.26(1.22,1.30)    | 0.98(0.93,1.03)    | 0.10(-0.03,0.22)   | 0.79(0.74,0.84)    | 61  |
| Spain                            | 11.23(10.36-12.22) | 66  | 12.88(11.94-13.96) | 74  | 0.87(0.85,0.89)    | 0.39(0.36,0.42)    | 0.12(0.08,0.16)    | 0.47(0.45,0.49)    | 131 |
| Sweden                           | 20.61(19.07-22.32) | 8   | 21.39(19.69-23.28) | 11  | 0.08(0.03,0.13)    | 0.13(0.12,0.15)    | 0.15(0.07,0.23)    | 0.12(0.09,0.15)    | 186 |
| Switzerland                      | 16.42(14.62-18.41) | 24  | 17.69(15.72-20.01) | 36  | 0.58(0.52,0.63)    | 0.37(0.31,0.42)    | -0.24(-0.38,-0.09) | 0.25(0.18,0.31)    | 174 |
| United Kingdom                   | 25.50(23.13-28.01) | 2   | 23.59(21.45-25.87) | 6   | 0.02(0.00,0.03)    | 0.02(0.00,0.03)    | -0.83(-1.10,-0.56) | -0.25(-0.33,-0.16) | 201 |
| Argentina                        | 9.74(8.65-11.07)   | 90  | 11.63(10.40-13.06) | 93  | 1.32(1.19,1.44)    | 0.54(0.46,0.62)    | -0.24(-0.43,-0.05) | 0.56(0.48,0.64)    | 119 |
| Chile                            | 14.58(13.10-16.23) | 36  | 20.96(18.91-23.47) | 15  | 1.65(1.63,1.67)    | 1.23(1.18,1.29)    | 0.88(0.85,0.91)    | 1.26(1.24,1.28)    | 8   |
| Uruguay                          | 10.15(9.00-11.51)  | 82  | 12.72(11.26-14.47) | 76  | 0.97(0.89,1.06)    | 0.66(0.64,0.69)    | 0.69(0.60,0.78)    | 0.79(0.75,0.83)    | 62  |
| Canada                           | 17.50(16.81-18.17) | 19  | 22.58(21.72-23.39) | 8   | 1.61(1.56,1.65)    | 0.62(0.59,0.66)    | 0.43(0.40,0.46)    | 0.87(0.85,0.90)    | 41  |
| United States of America         | 18.19(16.97-19.58) | 17  | 21.32(19.78-23.12) | 12  | 0.48(0.43,0.52)    | 0.96(0.92,1.00)    | 0.14(0.11,0.18)    | 0.56(0.54,0.59)    | 120 |
| Antigua and Barbuda              | 9.70(8.59-11.01)   | 92  | 12.04(10.69-13.63) | 85  | 0.94(0.93,0.96)    | 0.87(0.83,0.92)    | 0.50(0.46,0.55)    | 0.76(0.74,0.78)    | 72  |
| Bahamas                          | 9.63(8.49-11.06)   | 95  | 11.31(9.95-12.93)  | 100 | 0.95(0.88,1.03)    | 0.57(0.51,0.63)    | 0.09(0.06,0.12)    | 0.55(0.51,0.59)    | 122 |
| Barbados                         | 12.38(11.14-13.89) | 54  | 15.05(13.39-17.04) | 52  | 1.05(1.01,1.10)    | 0.77(0.74,0.80)    | 0.15(0.11,0.20)    | 0.66(0.64,0.69)    | 90  |
| Belize                           | 9.31(8.29-10.49)   | 100 | 11.72(10.31-13.34) | 90  | 0.86(0.67,1.05)    | 1.10(0.91,1.28)    | 0.42(0.37,0.48)    | 0.77(0.68,0.86)    | 67  |
| Cuba                             | 9.65(8.39-11.06)   | 94  | 12.28(10.78-13.98) | 82  | 0.97(0.93,1.00)    | 0.91(0.88,0.94)    | 0.62(0.59,0.65)    | 0.83(0.81,0.85)    | 49  |
| Dominica                         | 10.02(8.89-11.28)  | 86  | 11.13(9.94-12.60)  | 101 | 0.73(0.69,0.76)    | 0.35(0.27,0.44)    | -0.01(-0.03,0.00)  | 0.36(0.33,0.39)    | 156 |
| Dominican Republic               | 6.32(5.43-7.30)    | 122 | 8.01(6.87-9.41)    | 123 | 1.06(1.03,1.09)    | 0.94(0.90,0.98)    | 0.45(0.36,0.55)    | 0.83(0.79,0.86)    | 50  |
| Grenada                          | 6.43(5.56-7.47)    | 121 | 8.09(7.01-9.33)    | 121 | 1.11(1.07,1.15)    | 0.63(0.56,0.70)    | 0.74(0.65,0.83)    | 0.82(0.78,0.86)    | 53  |
| Guyana                           | 6.12(5.29-7.08)    | 126 | 7.71(6.71-8.87)    | 125 | 0.84(0.83,0.85)    | 0.44(0.43,0.44)    | 1.16(1.10,1.23)    | 0.80(0.78,0.82)    | 58  |
| Haiti                            | 8.88(7.93-9.97)    | 104 | 10.95(9.70-12.32)  | 102 | 0.90(0.86,0.93)    | 0.72(0.58,0.87)    | 0.54(0.32,0.77)    | 0.72(0.62,0.81)    | 81  |
| Jamaica                          | 7.39(6.40-8.47)    | 113 | 9.12(8.00-10.53)   | 113 | 0.84(0.79,0.89)    | 0.92(0.81,1.02)    | 0.53(0.44,0.61)    | 0.74(0.70,0.79)    | 77  |
| Saint Lucia                      | 10.22(9.16-11.34)  | 79  | 12.73(11.39-14.31) | 75  | 1.29(1.27,1.31)    | 0.73(0.71,0.74)    | 0.26(0.21,0.32)    | 0.76(0.74,0.78)    | 73  |
| Saint Vincent and the Grenadines | 7.01(6.13-8.03)    | 117 | 8.41(7.35-9.70)    | 116 | 0.53(0.47,0.59)    | 0.79(0.75,0.83)    | 0.62(0.54,0.70)    | 0.64(0.60,0.68)    | 95  |
| Suriname                         | 6.17(5.30-7.18)    | 125 | 7.68(6.65-8.95)    | 126 | 0.36(0.25,0.47)    | 0.81(0.76,0.86)    | 1.20(1.06,1.34)    | 0.79(0.73,0.85)    | 63  |
| Trinidad and Tobago              | 12.24(11.02-13.67) | 58  | 14.68(13.18-16.48) | 58  | 0.56(0.51,0.62)    | 1.05(1.00,1.10)    | 0.19(0.10,0.28)    | 0.62(0.57,0.66)    | 96  |
| Bolivia (Plurinational State of) | 10.24(9.18-11.54)  | 78  | 14.38(12.91-16.22) | 60  | 1.24(1.17,1.31)    | 1.39(1.36,1.41)    | 0.97(0.88,1.07)    | 1.19(1.15,1.23)    | 16  |

|                                    |                    |     |                    |     |                    |                    |                   |                    |     |
|------------------------------------|--------------------|-----|--------------------|-----|--------------------|--------------------|-------------------|--------------------|-----|
| Ecuador                            | 12.34(11.13-13.78) | 55  | 18.00(16.19-20.23) | 30  | 2.13(2.07,2.19)    | 0.98(0.86,1.10)    | 0.86(0.81,0.91)   | 1.31(1.26,1.36)    | 5   |
| Peru                               | 8.89(7.86-10.20)   | 103 | 13.29(11.71-15.23) | 70  | 1.39(1.25,1.54)    | 1.52(1.47,1.57)    | 1.30(1.27,1.34)   | 1.43(1.37,1.49)    | 1   |
| Colombia                           | 11.08(9.85-12.41)  | 68  | 14.04(12.55-15.76) | 63  | 1.36(1.15,1.57)    | 1.04(0.94,1.13)    | -0.15(-0.42,0.11) | 0.77(0.65,0.88)    | 68  |
| Costa Rica                         | 16.18(14.44-18.13) | 26  | 21.07(18.86-23.48) | 13  | 0.90(0.81,0.99)    | 0.96(0.91,1.00)    | 0.94(0.86,1.03)   | 0.93(0.89,0.98)    | 35  |
| El Salvador                        | 8.73(7.62-9.97)    | 105 | 11.89(10.42-13.66) | 87  | 1.48(1.34,1.62)    | 1.03(0.89,1.16)    | 0.68(0.64,0.72)   | 1.09(1.02,1.16)    | 18  |
| Guatemala                          | 10.11(9.01-11.46)  | 84  | 14.95(13.31-16.83) | 55  | 2.04(1.99,2.09)    | 1.20(1.14,1.27)    | 0.96(0.85,1.06)   | 1.39(1.35,1.43)    | 2   |
| Honduras                           | 18.82(17.03-20.88) | 14  | 25.06(22.49-27.68) | 5   | 1.26(1.17,1.34)    | 1.01(0.99,1.03)    | 0.64(0.57,0.71)   | 0.97(0.94,1.01)    | 28  |
| Mexico                             | 27.40(24.69-30.19) | 1   | 25.43(22.94-28.02) | 4   | -0.21(-0.25,-0.16) | -0.65(-1.02,-0.29) | -0.05(-0.15,0.04) | -0.29(-0.41,-0.17) | 202 |
| Nicaragua                          | 11.50(10.18-12.94) | 63  | 15.36(13.61-17.28) | 48  | 0.71(0.61,0.80)    | 1.40(1.34,1.46)    | 0.79(0.71,0.88)   | 1.00(0.95,1.05)    | 24  |
| Panama                             | 11.61(10.37-13.04) | 62  | 14.33(12.74-16.24) | 61  | 0.94(0.65,1.22)    | 0.45(0.36,0.55)    | 0.86(0.81,0.91)   | 0.74(0.64,0.83)    | 78  |
| Venezuela (Bolivarian Republic of) | 17.14(15.96-18.37) | 21  | 21.02(19.64-22.31) | 14  | 1.02(0.94,1.10)    | 0.49(0.42,0.57)    | 0.56(0.45,0.66)   | 0.69(0.63,0.74)    | 88  |
| Brazil                             | 11.29(10.11-12.63) | 65  | 11.98(10.71-13.39) | 86  | 0.09(0.01,0.17)    | 0.14(0.10,0.18)    | 0.43(0.38,0.49)   | 0.22(0.18,0.26)    | 178 |
| Paraguay                           | 9.58(8.39-10.94)   | 96  | 13.50(11.78-15.29) | 67  | 1.51(1.37,1.65)    | 0.71(0.64,0.77)    | 1.50(1.37,1.62)   | 1.20(1.13,1.28)    | 14  |
| Algeria                            | 3.99(3.44-4.61)    | 179 | 5.24(4.55-6.05)    | 147 | 0.34(0.31,0.38)    | 0.96(0.95,0.97)    | 1.57(1.43,1.70)   | 0.96(0.91,1.00)    | 30  |
| Bahrain                            | 5.73(5.05-6.54)    | 132 | 8.06(7.08-9.21)    | 122 | 1.27(0.84,1.71)    | 1.01(0.95,1.06)    | 1.36(1.18,1.54)   | 1.20(1.05,1.35)    | 15  |
| Egypt                              | 3.75(3.20-4.41)    | 190 | 4.91(4.20-5.70)    | 162 | 0.87(0.70,1.05)    | 0.59(0.54,0.64)    | 1.41(1.30,1.52)   | 0.96(0.88,1.03)    | 31  |
| Iran (Islamic Republic of)         | 4.68(4.18-5.24)    | 141 | 5.04(4.47-5.64)    | 153 | 0.16(0.12,0.21)    | 0.00(-0.03,0.03)   | 0.65(0.43,0.88)   | 0.26(0.19,0.33)    | 172 |
| Iraq                               | 4.01(3.46-4.68)    | 176 | 5.03(4.34-5.80)    | 154 | -0.26(-0.43,-0.10) | 1.23(1.19,1.27)    | 1.45(1.32,1.57)   | 0.80(0.73,0.87)    | 59  |
| Jordan                             | 3.76(3.22-4.38)    | 188 | 5.04(4.33-5.90)    | 152 | 0.53(0.41,0.65)    | 1.28(1.26,1.30)    | 1.28(1.26,1.30)   | 1.05(1.00,1.09)    | 21  |
| Kuwait                             | 4.29(3.65-5.05)    | 152 | 5.70(4.87-6.66)    | 139 | 0.07(-0.11,0.26)   | 0.99(0.84,1.14)    | 1.85(1.80,1.91)   | 1.00(0.91,1.08)    | 25  |
| Lebanon                            | 3.90(3.34-4.58)    | 186 | 5.41(4.58-6.31)    | 144 | 0.66(0.54,0.78)    | 1.37(1.31,1.43)    | 1.43(1.15,1.70)   | 1.17(1.07,1.26)    | 17  |
| Libya                              | 3.71(3.15-4.38)    | 193 | 4.65(3.92-5.47)    | 180 | 0.55(0.48,0.62)    | 1.18(1.06,1.29)    | 0.71(0.43,1.00)   | 0.82(0.72,0.92)    | 54  |
| Morocco                            | 3.45(2.96-4.00)    | 199 | 4.51(3.88-5.28)    | 189 | 0.45(0.40,0.51)    | 0.91(0.89,0.92)    | 1.45(1.28,1.62)   | 0.93(0.88,0.99)    | 36  |
| Palestine                          | 4.06(3.51-4.70)    | 168 | 4.97(4.30-5.72)    | 160 | 0.41(0.36,0.46)    | 0.49(0.46,0.51)    | 1.22(1.18,1.27)   | 0.70(0.68,0.73)    | 85  |
| Oman                               | 3.41(2.93-3.97)    | 200 | 4.67(4.00-5.43)    | 179 | 1.49(1.22,1.77)    | 1.00(0.89,1.11)    | 0.89(0.69,1.09)   | 1.09(0.97,1.22)    | 19  |
| Qatar                              | 3.98(3.41-4.62)    | 181 | 5.30(4.54-6.18)    | 145 | 1.04(0.93,1.16)    | 0.75(0.66,0.84)    | 1.29(1.19,1.40)   | 1.02(0.95,1.08)    | 22  |
| Saudi Arabia                       | 3.50(2.95-4.13)    | 198 | 4.97(4.21-5.84)    | 159 | 0.90(0.79,1.02)    | 1.11(1.09,1.14)    | 1.71(1.40,2.02)   | 1.23(1.13,1.33)    | 9   |
| Syrian Arab Republic               | 3.76(3.22-4.39)    | 189 | 5.00(4.25-5.87)    | 157 | 0.73(0.51,0.96)    | 0.83(0.72,0.95)    | 1.46(1.34,1.58)   | 1.02(0.93,1.12)    | 23  |
| Tunisia                            | 3.77(3.21-4.38)    | 187 | 5.01(4.26-5.83)    | 156 | 0.51(0.44,0.58)    | 1.05(1.04,1.07)    | 1.41(1.18,1.63)   | 0.99(0.92,1.07)    | 27  |
| Turkey                             | 7.93(7.14-8.81)    | 110 | 11.35(10.27-12.51) | 99  | 1.02(0.92,1.13)    | 1.88(1.80,1.96)    | 0.69(0.57,0.82)   | 1.23(1.17,1.30)    | 10  |
| United Arab Emirates               | 3.73(3.20-4.33)    | 191 | 4.80(4.13-5.57)    | 172 | 0.38(0.24,0.52)    | 0.31(0.10,0.51)    | 2.05(1.93,2.18)   | 0.86(0.76,0.96)    | 42  |
| Yemen                              | 3.15(2.71-3.68)    | 204 | 3.75(3.23-4.37)    | 203 | 0.21(0.16,0.26)    | 0.84(0.82,0.86)    | 0.72(0.64,0.80)   | 0.61(0.57,0.64)    | 98  |
| Afghanistan                        | 3.93(3.43-4.51)    | 185 | 4.40(3.85-5.07)    | 193 | -0.46(-0.52,-0.40) | 0.69(0.67,0.72)    | 0.89(0.88,0.90)   | 0.39(0.37,0.41)    | 151 |
| Bangladesh                         | 14.66(13.17-16.34) | 34  | 20.95(18.66-23.49) | 16  | 0.60(0.51,0.70)    | 1.60(1.54,1.67)    | 1.38(1.29,1.48)   | 1.22(1.16,1.27)    | 11  |
| Bhutan                             | 13.96(12.60-15.53) | 42  | 20.60(18.47-22.93) | 20  | 0.91(0.79,1.02)    | 1.80(1.76,1.84)    | 1.21(1.11,1.30)   | 1.34(1.29,1.39)    | 3   |
| India                              | 16.48(14.87-18.21) | 23  | 17.40(15.70-19.20) | 38  | 0.26(0.22,0.29)    | 0.14(0.12,0.16)    | 0.14(0.06,0.21)   | 0.18(0.15,0.20)    | 183 |
| Nepal                              | 14.23(12.86-15.83) | 41  | 20.53(18.53-22.75) | 22  | 1.15(1.07,1.23)    | 1.28(1.17,1.39)    | 1.38(1.33,1.43)   | 1.28(1.23,1.33)    | 6   |
| Pakistan                           | 20.10(18.25-22.19) | 10  | 20.36(18.41-22.55) | 25  | -0.26(-0.39,-0.13) | 0.09(0.05,0.14)    | 0.34(0.24,0.45)   | 0.06(0.00,0.12)    | 189 |

|                                  |                    |     |                    |     |                    |                    |                    |                    |     |
|----------------------------------|--------------------|-----|--------------------|-----|--------------------|--------------------|--------------------|--------------------|-----|
| Angola                           | 9.35(8.34-10.49)   | 99  | 11.68(10.37-13.19) | 91  | 0.22(0.14,0.29)    | 1.24(1.21,1.27)    | 0.76(0.46,1.06)    | 0.77(0.68,0.87)    | 69  |
| Central African Republic         | 9.70(8.61-10.91)   | 91  | 9.85(8.79-11.00)   | 108 | -0.14(-0.23,-0.05) | 0.38(0.35,0.40)    | -0.12(-0.41,0.17)  | 0.06(-0.03,0.16)   | 190 |
| Congo                            | 9.89(8.83-11.10)   | 87  | 11.66(10.34-13.09) | 92  | -0.17(-0.29,-0.06) | 1.48(1.23,1.74)    | 0.47(0.28,0.66)    | 0.58(0.47,0.69)    | 111 |
| Democratic Republic of the Congo | 9.03(7.95-10.19)   | 102 | 10.09(8.93-11.47)  | 106 | -0.04(-0.18,0.09)  | 0.53(0.50,0.56)    | 0.53(0.50,0.56)    | 0.35(0.30,0.40)    | 157 |
| Equatorial Guinea                | 8.31(7.41-9.41)    | 108 | 12.33(10.92-13.97) | 79  | 1.09(0.88,1.31)    | 2.41(2.26,2.57)    | 0.30(0.08,0.52)    | 1.34(1.21,1.47)    | 4   |
| Gabon                            | 9.87(8.78-11.04)   | 88  | 12.29(10.93-13.92) | 81  | 0.34(0.27,0.40)    | 1.13(1.09,1.18)    | 0.86(0.53,1.20)    | 0.77(0.67,0.88)    | 70  |
| Burundi                          | 13.16(11.87-14.63) | 50  | 15.27(13.74-16.95) | 49  | 0.36(0.23,0.48)    | 1.20(1.10,1.30)    | -0.11(-0.27,0.05)  | 0.51(0.42,0.59)    | 126 |
| Comoros                          | 14.50(13.05-16.16) | 37  | 17.79(15.86-19.78) | 33  | 0.29(0.18,0.39)    | 1.35(1.25,1.45)    | 0.35(0.27,0.43)    | 0.70(0.64,0.76)    | 86  |
| Djibouti                         | 15.74(14.10-17.57) | 27  | 19.11(17.11-21.32) | 27  | -0.36(-0.58,-0.13) | 1.36(1.30,1.42)    | 0.83(0.72,0.93)    | 0.66(0.58,0.74)    | 91  |
| Eritrea                          | 13.76(12.50-15.29) | 45  | 17.44(15.51-19.50) | 37  | 0.75(0.63,0.86)    | 0.80(0.55,1.05)    | 0.89(0.79,0.98)    | 0.83(0.73,0.92)    | 51  |
| Ethiopia                         | 14.28(12.81-15.82) | 40  | 15.19(13.61-16.84) | 50  | 0.00(-0.11,0.11)   | 0.41(0.36,0.45)    | 0.12(0.02,0.22)    | 0.20(0.14,0.25)    | 180 |
| Kenya                            | 18.34(16.47-20.32) | 15  | 17.93(16.06-19.92) | 31  | -0.16(-0.19,-0.14) | -0.03(-0.04,-0.03) | -0.06(-0.13,0.02)  | -0.08(-0.11,-0.05) | 195 |
| Madagascar                       | 13.43(12.07-14.91) | 48  | 15.15(13.60-16.81) | 51  | 0.36(0.27,0.46)    | 0.60(0.51,0.70)    | 0.21(0.12,0.31)    | 0.40(0.34,0.46)    | 148 |
| Malawi                           | 15.13(13.63-16.90) | 31  | 17.74(16.04-19.62) | 35  | 0.16(0.10,0.23)    | 0.84(0.81,0.86)    | 0.65(0.53,0.76)    | 0.56(0.52,0.61)    | 121 |
| Mauritius                        | 6.17(5.35-7.24)    | 124 | 7.33(6.39-8.54)    | 129 | 0.93(0.85,1.01)    | 0.24(0.18,0.30)    | 0.65(0.55,0.75)    | 0.58(0.53,0.63)    | 112 |
| Mozambique                       | 14.39(13.03-16.00) | 39  | 17.74(15.91-19.78) | 34  | 0.67(0.59,0.75)    | 0.89(0.84,0.94)    | 0.52(0.44,0.59)    | 0.71(0.66,0.75)    | 83  |
| Rwanda                           | 14.42(12.95-16.03) | 38  | 18.91(16.83-21.03) | 29  | -0.12(-0.51,0.28)  | 1.91(1.81,2.01)    | 0.80(0.64,0.95)    | 0.93(0.79,1.07)    | 37  |
| Seychelles                       | 3.99(3.41-4.66)    | 178 | 4.53(3.87-5.28)    | 188 | 0.26(0.16,0.35)    | 0.38(0.33,0.43)    | 0.76(0.66,0.85)    | 0.46(0.41,0.51)    | 136 |
| Somalia                          | 19.31(17.23-21.50) | 11  | 20.45(18.17-22.99) | 24  | -0.22(-0.34,-0.09) | 0.54(0.50,0.57)    | 0.19(0.06,0.32)    | 0.19(0.14,0.25)    | 182 |
| United Republic of Tanzania      | 15.17(13.49-16.93) | 30  | 17.86(15.93-19.93) | 32  | 0.28(0.21,0.34)    | 0.91(0.86,0.96)    | 0.52(0.40,0.64)    | 0.57(0.52,0.62)    | 116 |
| Uganda                           | 13.55(12.14-15.04) | 47  | 16.15(14.48-17.99) | 45  | -0.14(-0.34,0.07)  | 1.20(1.00,1.40)    | 0.68(0.62,0.74)    | 0.58(0.48,0.68)    | 113 |
| Zambia                           | 16.30(14.72-18.07) | 25  | 20.81(18.90-22.98) | 17  | 0.00(-0.23,0.22)   | 1.24(1.19,1.28)    | 1.24(1.19,1.28)    | 0.85(0.77,0.93)    | 45  |
| Botswana                         | 12.96(11.59-14.58) | 51  | 16.39(14.45-18.36) | 42  | 0.93(0.78,1.08)    | 0.54(0.35,0.72)    | 0.75(0.53,0.96)    | 0.75(0.63,0.86)    | 74  |
| Lesotho                          | 12.93(11.60-14.42) | 53  | 14.10(12.58-15.75) | 62  | 0.02(-0.17,0.21)   | 0.12(0.06,0.18)    | 0.78(0.72,0.85)    | 0.30(0.22,0.37)    | 167 |
| Namibia                          | 13.62(12.17-15.33) | 46  | 17.16(15.28-19.13) | 39  | 0.31(0.14,0.48)    | 1.00(0.93,1.07)    | 0.91(0.75,1.07)    | 0.77(0.69,0.86)    | 71  |
| South Africa                     | 20.24(18.16-22.56) | 9   | 19.29(17.25-21.47) | 26  | -0.34(-0.39,-0.29) | 0.22(0.19,0.25)    | -0.36(-0.59,-0.13) | -0.15(-0.23,-0.08) | 199 |
| Eswatini                         | 14.89(13.33-16.68) | 32  | 16.51(14.82-18.31) | 41  | 0.09(-0.05,0.23)   | -0.04(-0.11,0.02)  | 0.90(0.72,1.07)    | 0.32(0.24,0.40)    | 162 |
| Zimbabwe                         | 7.21(6.34-8.28)    | 115 | 7.18(6.32-8.20)    | 130 | -0.66(-0.75,-0.58) | -0.64(-0.71,-0.57) | 1.42(1.36,1.49)    | -0.01(-0.06,0.04)  | 192 |
| Benin                            | 4.15(3.63-4.74)    | 159 | 4.83(4.24-5.53)    | 171 | 0.38(0.34,0.41)    | 0.67(0.63,0.71)    | 0.49(0.44,0.55)    | 0.52(0.49,0.54)    | 124 |
| Burkina Faso                     | 3.97(3.46-4.54)    | 183 | 4.59(4.02-5.24)    | 182 | 0.57(0.52,0.61)    | 0.65(0.60,0.70)    | 0.28(0.22,0.35)    | 0.51(0.47,0.54)    | 127 |
| Cameroon                         | 4.50(3.90-5.18)    | 146 | 5.29(4.64-6.07)    | 146 | 0.02(-0.05,0.10)   | 0.72(0.61,0.83)    | 0.96(0.88,1.05)    | 0.58(0.52,0.63)    | 114 |
| Cabo Verde                       | 3.36(2.90-3.90)    | 201 | 4.19(3.63-4.84)    | 198 | 0.41(0.36,0.46)    | 0.87(0.85,0.89)    | 1.04(0.94,1.13)    | 0.78(0.75,0.81)    | 64  |
| Chad                             | 3.98(3.48-4.55)    | 180 | 4.50(3.94-5.10)    | 190 | 0.05(-0.03,0.12)   | 0.55(0.53,0.58)    | 0.74(0.70,0.79)    | 0.43(0.40,0.46)    | 141 |
| Cote d'Ivoire                    | 4.32(3.76-4.95)    | 151 | 4.91(4.27-5.60)    | 163 | 0.15(0.09,0.20)    | 0.62(0.58,0.67)    | 0.57(0.45,0.69)    | 0.46(0.41,0.50)    | 137 |
| Gambia                           | 4.15(3.61-4.74)    | 160 | 4.75(4.12-5.46)    | 177 | 0.32(0.30,0.34)    | 0.49(0.40,0.58)    | 0.62(0.59,0.66)    | 0.46(0.43,0.49)    | 138 |
| Ghana                            | 4.05(3.50-4.72)    | 170 | 5.10(4.38-5.94)    | 149 | 0.77(0.73,0.81)    | 0.54(0.50,0.59)    | 1.20(1.06,1.34)    | 0.82(0.76,0.87)    | 55  |
| Guinea                           | 4.15(3.63-4.72)    | 161 | 4.77(4.17-5.51)    | 174 | 0.28(0.26,0.30)    | 0.64(0.58,0.69)    | 0.59(0.55,0.62)    | 0.49(0.46,0.51)    | 130 |
| Guinea-Bissau                    | 4.07(3.55-4.67)    | 167 | 4.56(4.00-5.18)    | 187 | 0.06(0.05,0.07)    | 0.60(0.58,0.61)    | 0.55(0.52,0.58)    | 0.40(0.39,0.41)    | 149 |

|                                       |                    |     |                    |     |                    |                    |                    |                    |     |
|---------------------------------------|--------------------|-----|--------------------|-----|--------------------|--------------------|--------------------|--------------------|-----|
| Liberia                               | 4.12(3.61-4.71)    | 163 | 4.87(4.24-5.58)    | 166 | 0.12(0.07,0.17)    | 1.11(1.05,1.18)    | 0.45(0.36,0.54)    | 0.58(0.54,0.62)    | 115 |
| Mali                                  | 4.04(3.52-4.61)    | 172 | 4.88(4.26-5.60)    | 164 | 0.76(0.72,0.80)    | 0.79(0.68,0.90)    | 0.48(0.42,0.55)    | 0.66(0.62,0.70)    | 92  |
| Mauritania                            | 4.32(3.76-4.94)    | 150 | 5.50(4.78-6.30)    | 142 | 0.81(0.80,0.83)    | 0.77(0.76,0.79)    | 0.93(0.92,0.95)    | 0.84(0.83,0.85)    | 48  |
| Niger                                 | 3.95(3.45-4.50)    | 184 | 4.57(4.00-5.22)    | 186 | 0.35(0.31,0.39)    | 0.80(0.76,0.84)    | 0.34(0.27,0.41)    | 0.50(0.47,0.53)    | 128 |
| Nigeria                               | 3.66(3.27-4.09)    | 195 | 4.35(3.88-4.86)    | 194 | 0.52(0.50,0.53)    | 0.43(0.41,0.44)    | 0.98(0.82,1.14)    | 0.61(0.55,0.66)    | 99  |
| Sao Tome and Principe                 | 3.97(3.43-4.55)    | 182 | 4.88(4.21-5.63)    | 165 | 0.44(0.34,0.53)    | 0.71(0.67,0.75)    | 0.99(0.89,1.09)    | 0.71(0.66,0.76)    | 84  |
| Senegal                               | 4.24(3.70-4.88)    | 156 | 4.84(4.26-5.57)    | 169 | 0.31(0.27,0.35)    | 0.50(0.46,0.54)    | 0.60(0.54,0.65)    | 0.47(0.44,0.49)    | 132 |
| Sierra Leone                          | 4.01(3.50-4.56)    | 177 | 4.58(3.95-5.24)    | 184 | 0.07(0.03,0.11)    | 0.43(0.36,0.50)    | 0.91(0.87,0.96)    | 0.47(0.43,0.50)    | 133 |
| Togo                                  | 4.13(3.60-4.74)    | 162 | 4.57(3.95-5.23)    | 185 | -0.12(-0.19,-0.05) | 0.43(0.35,0.51)    | 0.79(0.70,0.88)    | 0.37(0.32,0.42)    | 155 |
| American Samoa                        | 4.55(3.91-5.30)    | 143 | 4.87(4.18-5.64)    | 167 | 0.71(0.65,0.77)    | -0.07(-0.29,0.15)  | 0.19(0.11,0.27)    | 0.26(0.18,0.34)    | 173 |
| Bermuda                               | 9.44(8.30-10.77)   | 98  | 12.27(10.66-14.14) | 83  | 1.31(1.23,1.39)    | 1.04(0.98,1.09)    | 0.42(0.37,0.46)    | 0.93(0.89,0.97)    | 38  |
| Cook Islands                          | 4.24(3.62-4.96)    | 155 | 5.05(4.31-5.92)    | 151 | 0.60(0.49,0.72)    | 0.45(0.42,0.49)    | 0.80(0.73,0.88)    | 0.62(0.57,0.67)    | 97  |
| Greenland                             | 10.57(9.49-11.83)  | 72  | 15.04(13.63-16.78) | 53  | 1.58(1.52,1.63)    | 0.92(0.89,0.95)    | 1.19(0.97,1.42)    | 1.21(1.14,1.28)    | 12  |
| Guam                                  | 4.53(3.84-5.36)    | 144 | 4.85(4.11-5.71)    | 168 | 0.52(0.41,0.62)    | -0.11(-0.14,-0.09) | 0.35(0.27,0.43)    | 0.27(0.23,0.32)    | 170 |
| Monaco                                | 8.54(7.40-9.80)    | 106 | 9.44(8.13-10.90)   | 112 | 0.04(-0.11,0.18)   | 0.38(0.30,0.46)    | 0.75(0.60,0.90)    | 0.39(0.31,0.47)    | 152 |
| Nauru                                 | 4.07(3.48-4.75)    | 166 | 4.49(3.87-5.20)    | 191 | -0.18(-0.28,-0.09) | -0.18(-0.29,-0.07) | 1.53(1.44,1.61)    | 0.35(0.28,0.41)    | 158 |
| Niue                                  | 4.23(3.63-4.93)    | 157 | 4.99(4.29-5.77)    | 158 | 0.61(0.43,0.79)    | 0.50(0.47,0.54)    | 0.67(0.57,0.77)    | 0.59(0.52,0.65)    | 105 |
| Northern Mariana Islands              | 4.61(3.96-5.37)    | 142 | 5.06(4.35-5.89)    | 150 | 1.32(1.22,1.41)    | -0.32(-0.45,-0.18) | -0.03(-0.25,0.18)  | 0.31(0.22,0.40)    | 165 |
| Palau                                 | 4.22(3.63-4.93)    | 158 | 4.58(3.90-5.33)    | 183 | 0.43(0.26,0.61)    | 0.23(0.19,0.27)    | 0.23(-0.04,0.50)   | 0.29(0.19,0.39)    | 169 |
| Puerto Rico                           | 10.69(9.35-12.50)  | 71  | 14.03(12.26-16.29) | 64  | 1.04(0.99,1.09)    | 1.20(1.17,1.22)    | 0.59(0.50,0.69)    | 0.95(0.92,0.99)    | 33  |
| Saint Kitts and Nevis                 | 10.16(8.95-11.62)  | 81  | 12.38(10.89-14.18) | 78  | 1.13(1.07,1.20)    | 0.65(0.56,0.73)    | 0.20(0.11,0.29)    | 0.66(0.61,0.71)    | 93  |
| San Marino                            | 10.52(8.82-12.40)  | 73  | 11.87(9.95-13.98)  | 88  | 0.03(-0.22,0.29)   | 0.52(0.43,0.62)    | 0.89(0.61,1.17)    | 0.47(0.33,0.61)    | 134 |
| Tokelau                               | 3.65(3.14-4.25)    | 196 | 4.29(3.68-4.98)    | 196 | 0.44(0.18,0.70)    | 0.39(0.31,0.47)    | 0.88(0.70,1.06)    | 0.57(0.46,0.69)    | 117 |
| Tuvalu                                | 3.71(3.20-4.34)    | 192 | 4.07(3.49-4.76)    | 199 | 0.50(0.47,0.53)    | 0.01(-0.01,0.03)   | 0.50(0.45,0.55)    | 0.33(0.31,0.35)    | 161 |
| United States Virgin Islands          | 8.29(7.21-9.63)    | 109 | 10.37(8.94-12.09)  | 105 | 1.10(1.01,1.19)    | 0.93(0.77,1.08)    | 0.30(0.25,0.35)    | 0.78(0.71,0.84)    | 65  |
| South Sudan                           | 15.20(13.55-16.98) | 29  | 16.20(14.50-18.15) | 44  | -0.10(-0.30,0.10)  | 0.56(0.51,0.60)    | 0.10(0.08,0.13)    | 0.21(0.14,0.27)    | 179 |
| Sudan                                 | 3.20(2.76-3.72)    | 203 | 4.20(3.63-4.84)    | 197 | 0.36(0.28,0.43)    | 0.84(0.80,0.87)    | 1.75(1.69,1.82)    | 0.97(0.93,1.01)    | 29  |
| <i>Psoriasis</i>                      |                    |     |                    |     |                    |                    |                    |                    |     |
| China                                 | 68.25(65.84-70.70) | 76  | 53.96(52.08-55.79) | 84  | -0.79(-0.81,-0.77) | -0.78(-0.84,-0.71) | -0.81(-0.84,-0.78) | -0.80(-0.82,-0.77) | 182 |
| Democratic People's Republic of Korea | 78.63(75.46-81.89) | 42  | 65.62(63.03-68.17) | 42  | -0.52(-0.55,-0.49) | -0.65(-0.66,-0.64) | -0.69(-0.71,-0.67) | -0.62(-0.63,-0.61) | 141 |
| Taiwan (Province of China)            | 63.63(61.06-66.31) | 91  | 50.17(48.18-52.02) | 99  | -0.92(-0.96,-0.87) | -0.74(-0.77,-0.71) | -0.84(-0.91,-0.77) | -0.82(-0.85,-0.79) | 185 |
| Cambodia                              | 31.31(30.05-32.54) | 173 | 26.61(25.56-27.67) | 172 | -0.53(-0.59,-0.47) | -0.66(-0.70,-0.62) | -0.53(-0.56,-0.50) | -0.57(-0.59,-0.54) | 125 |
| Indonesia                             | 14.32(13.76-14.84) | 204 | 12.92(12.42-13.38) | 204 | -0.47(-0.66,-0.29) | -0.43(-0.85,-0.01) | -0.19(-0.28,-0.10) | -0.35(-0.50,-0.20) | 53  |
| Lao People's Democratic Republic      | 32.21(30.88-33.49) | 169 | 27.20(26.15-28.17) | 170 | -0.49(-0.53,-0.46) | -0.63(-0.64,-0.62) | -0.64(-0.69,-0.59) | -0.58(-0.60,-0.56) | 130 |
| Malaysia                              | 23.39(22.46-24.25) | 198 | 19.73(18.93-20.50) | 200 | -0.82(-0.85,-0.80) | -0.56(-0.66,-0.45) | -0.40(-0.43,-0.37) | -0.59(-0.63,-0.56) | 134 |
| Maldives                              | 28.36(27.30-29.48) | 179 | 22.91(21.97-23.84) | 189 | -1.11(-1.12,-1.09) | -0.67(-0.68,-0.65) | -0.45(-0.49,-0.40) | -0.73(-0.74,-0.72) | 172 |
| Myanmar                               | 31.75(30.57-33.00) | 170 | 26.46(25.45-27.42) | 174 | -0.43(-0.45,-0.42) | -0.86(-0.88,-0.84) | -0.60(-0.65,-0.56) | -0.63(-0.64,-0.61) | 145 |
| Philippines                           | 26.62(25.68-27.54) | 190 | 24.32(23.45-25.18) | 182 | -0.42(-0.47,-0.37) | 0.14(0.10,0.18)    | -0.72(-0.84,-0.59) | -0.30(-0.34,-0.26) | 43  |

|                                  |                    |     |                    |     |                    |                    |                    |                    |     |
|----------------------------------|--------------------|-----|--------------------|-----|--------------------|--------------------|--------------------|--------------------|-----|
| Sri Lanka                        | 42.54(40.75-44.43) | 127 | 34.90(33.40-36.41) | 132 | -0.70(-0.73,-0.67) | -0.52(-0.54,-0.51) | -0.81(-0.86,-0.75) | -0.68(-0.70,-0.66) | 164 |
| Thailand                         | 25.66(24.59-26.69) | 193 | 22.29(21.38-23.16) | 192 | -0.66(-0.68,-0.64) | -0.39(-0.40,-0.38) | -0.40(-0.48,-0.32) | -0.48(-0.50,-0.45) | 101 |
| Timor-Leste                      | 30.72(29.52-31.95) | 174 | 25.48(24.46-26.45) | 179 | -0.07(-0.12,-0.01) | -1.47(-1.56,-1.38) | -0.40(-0.56,-0.24) | -0.63(-0.69,-0.56) | 146 |
| Viet Nam                         | 28.97(27.81-30.15) | 177 | 24.01(23.05-24.90) | 185 | -0.77(-0.81,-0.72) | -0.65(-0.66,-0.64) | -0.55(-0.57,-0.53) | -0.65(-0.67,-0.64) | 153 |
| Fiji                             | 39.16(37.58-40.89) | 138 | 34.22(32.82-35.65) | 137 | -0.60(-0.61,-0.59) | -0.34(-0.35,-0.33) | -0.46(-0.51,-0.41) | -0.46(-0.48,-0.45) | 95  |
| Kiribati                         | 39.24(37.71-40.75) | 137 | 37.03(35.47-38.47) | 126 | -0.34(-0.40,-0.29) | 0.03(0.00,0.06)    | -0.34(-0.38,-0.29) | -0.20(-0.23,-0.18) | 17  |
| Marshall Islands                 | 41.86(40.13-43.63) | 128 | 35.74(34.30-37.22) | 129 | -0.64(-0.66,-0.61) | -0.46(-0.47,-0.45) | -0.53(-0.58,-0.49) | -0.54(-0.56,-0.52) | 117 |
| Micronesia (Federated States of) | 39.48(37.85-41.09) | 134 | 34.52(33.10-35.88) | 136 | -0.58(-0.61,-0.54) | -0.43(-0.44,-0.42) | -0.39(-0.43,-0.35) | -0.46(-0.48,-0.44) | 96  |
| Papua New Guinea                 | 44.77(42.94-46.62) | 121 | 40.26(38.65-41.89) | 120 | -0.37(-0.40,-0.34) | -0.23(-0.24,-0.22) | -0.49(-0.54,-0.45) | -0.37(-0.38,-0.35) | 58  |
| Samoa                            | 38.21(36.69-39.82) | 142 | 36.22(34.78-37.72) | 127 | -0.07(-0.08,-0.06) | -0.07(-0.08,-0.06) | -0.43(-0.47,-0.38) | -0.18(-0.20,-0.17) | 13  |
| Solomon Islands                  | 45.75(43.89-47.63) | 119 | 40.32(38.73-42.01) | 119 | -0.53(-0.57,-0.50) | -0.22(-0.24,-0.20) | -0.54(-0.62,-0.46) | -0.43(-0.46,-0.40) | 82  |
| Tonga                            | 40.31(38.65-41.96) | 132 | 35.65(34.12-37.07) | 130 | -0.54(-0.57,-0.51) | -0.21(-0.23,-0.20) | -0.54(-0.61,-0.47) | -0.42(-0.44,-0.39) | 75  |
| Vanuatu                          | 44.26(42.40-46.12) | 123 | 39.22(37.62-40.79) | 122 | -0.47(-0.48,-0.45) | -0.37(-0.38,-0.36) | -0.41(-0.43,-0.38) | -0.41(-0.42,-0.40) | 72  |
| Armenia                          | 72.91(69.75-76.01) | 56  | 59.08(56.49-61.61) | 59  | -0.63(-0.64,-0.61) | -1.09(-1.13,-1.06) | -0.36(-0.42,-0.30) | -0.73(-0.75,-0.70) | 173 |
| Azerbaijan                       | 70.13(67.19-73.03) | 68  | 59.72(57.17-62.30) | 56  | -0.15(-0.18,-0.12) | -0.98(-1.14,-0.81) | -0.36(-0.40,-0.31) | -0.53(-0.59,-0.47) | 112 |
| Georgia                          | 67.69(64.70-70.62) | 79  | 59.71(56.98-62.39) | 57  | -0.10(-0.17,-0.03) | -0.62(-0.66,-0.58) | -0.56(-0.60,-0.52) | -0.42(-0.45,-0.39) | 76  |
| Kazakhstan                       | 73.10(70.03-76.27) | 53  | 60.82(58.18-63.48) | 51  | -0.61(-0.66,-0.56) | -0.79(-0.84,-0.75) | -0.41(-0.44,-0.37) | -0.62(-0.65,-0.59) | 142 |
| Kyrgyzstan                       | 75.07(71.80-78.34) | 49  | 65.51(62.69-68.44) | 43  | -0.41(-0.49,-0.34) | -0.58(-0.69,-0.47) | -0.38(-0.42,-0.34) | -0.45(-0.49,-0.40) | 91  |
| Mongolia                         | 79.06(75.73-82.49) | 41  | 64.79(62.10-67.41) | 45  | -0.70(-0.74,-0.66) | -0.83(-0.87,-0.79) | -0.45(-0.47,-0.42) | -0.67(-0.70,-0.65) | 159 |
| Tajikistan                       | 77.86(74.53-81.29) | 44  | 66.70(64.02-69.41) | 40  | -0.25(-0.30,-0.20) | -0.81(-0.84,-0.77) | -0.59(-0.61,-0.57) | -0.53(-0.55,-0.51) | 113 |
| Turkmenistan                     | 72.63(69.56-75.68) | 57  | 58.52(56.03-61.07) | 63  | -0.68(-0.72,-0.63) | -0.83(-0.92,-0.75) | -0.73(-0.85,-0.61) | -0.76(-0.82,-0.70) | 176 |
| Uzbekistan                       | 77.46(74.17-80.71) | 45  | 62.94(60.23-65.55) | 46  | -0.66(-0.69,-0.64) | -0.84(-0.91,-0.76) | -0.59(-0.62,-0.56) | -0.71(-0.74,-0.69) | 170 |
| Albania                          | 74.94(72.10-77.72) | 50  | 60.91(58.67-63.18) | 48  | -0.52(-0.57,-0.48) | -1.11(-1.16,-1.06) | -0.38(-0.42,-0.35) | -0.70(-0.73,-0.68) | 169 |
| Bosnia and Herzegovina           | 76.32(73.57-79.17) | 47  | 60.12(57.89-62.42) | 55  | -0.74(-0.86,-0.62) | -1.17(-1.22,-1.13) | -0.46(-0.56,-0.36) | -0.82(-0.87,-0.76) | 186 |
| Bulgaria                         | 70.45(67.78-73.06) | 67  | 58.11(55.82-60.29) | 65  | -0.67(-0.75,-0.58) | -0.91(-0.97,-0.85) | -0.33(-0.38,-0.29) | -0.65(-0.69,-0.61) | 154 |
| Croatia                          | 69.00(66.50-71.73) | 73  | 57.50(55.34-59.50) | 70  | -0.52(-0.57,-0.47) | -0.92(-0.98,-0.86) | -0.32(-0.36,-0.28) | -0.61(-0.65,-0.58) | 139 |
| Czechia                          | 69.88(67.24-72.49) | 69  | 57.23(55.07-59.25) | 72  | -0.89(-0.96,-0.81) | -0.84(-0.92,-0.77) | -0.23(-0.27,-0.18) | -0.67(-0.71,-0.63) | 160 |
| Hungary                          | 70.71(67.93-73.24) | 65  | 58.06(55.95-60.30) | 66  | -0.77(-0.83,-0.70) | -0.90(-0.97,-0.82) | -0.24(-0.29,-0.19) | -0.66(-0.69,-0.62) | 157 |
| North Macedonia                  | 71.00(68.39-73.55) | 64  | 58.56(56.37-60.71) | 62  | -0.54(-0.57,-0.51) | -1.00(-1.10,-0.90) | -0.37(-0.41,-0.33) | -0.66(-0.69,-0.62) | 158 |
| Montenegro                       | 67.25(64.71-69.65) | 80  | 56.85(54.75-58.93) | 75  | -0.25(-0.29,-0.20) | -1.03(-1.15,-0.92) | -0.39(-0.44,-0.34) | -0.58(-0.62,-0.53) | 131 |
| Poland                           | 73.46(70.74-76.22) | 52  | 65.78(64.06-67.44) | 41  | -0.49(-0.52,-0.47) | -0.22(-0.28,-0.16) | -0.36(-0.38,-0.33) | -0.38(-0.40,-0.35) | 62  |
| Romania                          | 68.55(66.08-71.07) | 75  | 55.82(53.80-57.82) | 79  | -0.60(-0.71,-0.49) | -1.03(-1.12,-0.95) | -0.35(-0.42,-0.29) | -0.68(-0.74,-0.63) | 165 |
| Serbia                           | 71.32(68.70-73.97) | 61  | 58.33(56.20-60.41) | 64  | -0.55(-0.57,-0.53) | -0.98(-1.03,-0.92) | -0.45(-0.60,-0.30) | -0.68(-0.73,-0.63) | 166 |
| Slovakia                         | 71.41(68.82-73.99) | 60  | 57.51(55.38-59.67) | 69  | -0.88(-0.93,-0.83) | -0.93(-1.01,-0.85) | -0.29(-0.34,-0.24) | -0.72(-0.76,-0.68) | 171 |
| Slovenia                         | 67.17(64.63-69.60) | 81  | 55.86(53.76-57.87) | 78  | -0.65(-0.66,-0.63) | -0.88(-0.93,-0.82) | -0.27(-0.37,-0.17) | -0.62(-0.66,-0.58) | 143 |
| Belarus                          | 73.03(70.29-75.73) | 54  | 60.86(58.59-63.25) | 49  | -0.53(-0.60,-0.47) | -0.85(-0.90,-0.81) | -0.45(-0.49,-0.42) | -0.63(-0.66,-0.60) | 147 |
| Estonia                          | 70.59(67.86-73.28) | 66  | 58.83(56.64-60.87) | 60  | -0.69(-0.74,-0.64) | -0.79(-0.84,-0.74) | -0.35(-0.38,-0.32) | -0.63(-0.65,-0.60) | 148 |
| Latvia                           | 69.73(67.18-72.28) | 70  | 58.73(56.55-60.91) | 61  | -0.61(-0.67,-0.55) | -0.79(-0.84,-0.73) | -0.28(-0.32,-0.24) | -0.57(-0.60,-0.54) | 126 |

|                          |                       |     |                       |     |                    |                    |                    |                    |     |
|--------------------------|-----------------------|-----|-----------------------|-----|--------------------|--------------------|--------------------|--------------------|-----|
| Lithuania                | 69.53(66.79-72.14)    | 71  | 57.60(55.41-59.75)    | 68  | -0.61(-0.66,-0.57) | -0.86(-0.89,-0.82) | -0.40(-0.42,-0.38) | -0.64(-0.66,-0.62) | 151 |
| Republic of Moldova      | 71.23(68.58-73.88)    | 62  | 61.25(58.87-63.51)    | 47  | -0.31(-0.38,-0.23) | -0.73(-0.78,-0.67) | -0.49(-0.53,-0.45) | -0.52(-0.55,-0.48) | 109 |
| Russian Federation       | 65.91(63.50-68.38)    | 84  | 59.21(57.28-61.16)    | 58  | -0.63(-0.67,-0.59) | -0.24(-0.35,-0.13) | -0.20(-0.25,-0.15) | -0.38(-0.42,-0.34) | 63  |
| Ukraine                  | 68.60(66.11-71.12)    | 74  | 60.36(58.10-62.65)    | 53  | -0.36(-0.42,-0.31) | -0.64(-0.69,-0.59) | -0.25(-0.28,-0.21) | -0.44(-0.46,-0.41) | 87  |
| Brunei Darussalam        | 37.38(36.03-38.81)    | 148 | 34.88(33.55-36.29)    | 133 | -0.30(-0.31,-0.30) | -0.30(-0.31,-0.30) | -0.14(-0.18,-0.10) | -0.24(-0.25,-0.22) | 26  |
| Japan                    | 40.49(39.10-41.93)    | 131 | 40.38(39.01-41.81)    | 118 | -0.06(-0.10,-0.02) | 0.04(0.03,0.05)    | -0.01(-0.06,0.04)  | -0.01(-0.03,0.01)  | 1   |
| Republic of Korea        | 44.19(42.50-45.92)    | 124 | 39.90(38.31-41.50)    | 121 | -0.61(-0.63,-0.59) | -0.28(-0.31,-0.25) | -0.15(-0.19,-0.11) | -0.34(-0.36,-0.32) | 51  |
| Singapore                | 35.99(34.58-37.41)    | 153 | 33.04(31.78-34.29)    | 142 | -0.42(-0.46,-0.39) | -0.31(-0.32,-0.30) | -0.13(-0.18,-0.08) | -0.29(-0.31,-0.27) | 40  |
| Australia                | 155.05(149.08-161.14) | 26  | 142.73(136.77-148.79) | 26  | 0.03(0.00,0.06)    | -0.26(-0.33,-0.19) | -0.68(-0.73,-0.63) | -0.29(-0.32,-0.26) | 41  |
| New Zealand              | 171.59(165.66-177.59) | 25  | 159.87(154.62-165.44) | 25  | -0.25(-0.29,-0.22) | -0.18(-0.20,-0.16) | -0.32(-0.35,-0.30) | -0.25(-0.27,-0.24) | 32  |
| Andorra                  | 212.89(205.45-220.17) | 19  | 205.10(197.96-212.51) | 16  | -0.14(-0.15,-0.12) | -0.14(-0.15,-0.13) | -0.11(-0.12,-0.10) | -0.13(-0.14,-0.12) | 5   |
| Austria                  | 229.67(221.20-237.70) | 10  | 216.20(208.51-223.83) | 8   | -0.28(-0.30,-0.26) | -0.18(-0.20,-0.16) | -0.16(-0.17,-0.16) | -0.21(-0.22,-0.20) | 20  |
| Belgium                  | 234.08(225.61-242.24) | 6   | 218.93(211.04-227.05) | 5   | -0.27(-0.27,-0.26) | -0.21(-0.21,-0.20) | -0.22(-0.23,-0.20) | -0.23(-0.24,-0.23) | 25  |
| Cyprus                   | 229.08(220.91-236.95) | 11  | 204.89(197.27-212.13) | 17  | -0.58(-0.58,-0.57) | -0.43(-0.44,-0.42) | -0.15(-0.16,-0.15) | -0.38(-0.39,-0.38) | 64  |
| Denmark                  | 230.39(222.16-238.47) | 9   | 218.22(210.57-225.87) | 7   | -0.24(-0.26,-0.23) | -0.16(-0.20,-0.13) | -0.14(-0.14,-0.14) | -0.19(-0.20,-0.17) | 14  |
| Finland                  | 247.68(239.38-256.34) | 2   | 232.84(224.40-240.97) | 2   | -0.23(-0.23,-0.22) | -0.23(-0.23,-0.22) | -0.19(-0.19,-0.18) | -0.21(-0.22,-0.21) | 21  |
| France                   | 269.37(259.26-279.81) | 1   | 251.69(242.53-261.04) | 1   | -0.11(-0.14,-0.07) | -0.23(-0.25,-0.20) | -0.40(-0.42,-0.37) | -0.24(-0.26,-0.22) | 27  |
| Germany                  | 188.69(181.93-195.68) | 21  | 182.18(176.00-188.52) | 21  | -0.20(-0.21,-0.19) | -0.20(-0.21,-0.19) | -0.03(-0.27,0.21)  | -0.15(-0.22,-0.07) | 8   |
| Greece                   | 231.79(223.71-240.33) | 7   | 215.64(208.24-223.06) | 9   | -0.38(-0.38,-0.37) | -0.27(-0.27,-0.26) | -0.11(-0.12,-0.09) | -0.25(-0.26,-0.24) | 33  |
| Iceland                  | 246.90(238.40-255.18) | 3   | 230.03(221.98-238.28) | 3   | -0.25(-0.25,-0.24) | -0.27(-0.28,-0.27) | -0.21(-0.21,-0.20) | -0.24(-0.25,-0.24) | 28  |
| Ireland                  | 239.47(231.16-247.78) | 5   | 218.86(211.50-226.86) | 6   | -0.37(-0.38,-0.36) | -0.30(-0.31,-0.30) | -0.26(-0.27,-0.25) | -0.31(-0.32,-0.31) | 44  |
| Israel                   | 218.52(211.23-225.94) | 15  | 206.30(199.54-214.06) | 15  | -0.24(-0.26,-0.23) | -0.17(-0.18,-0.16) | -0.19(-0.20,-0.18) | -0.20(-0.21,-0.19) | 18  |
| Italy                    | 184.41(178.27-190.41) | 22  | 172.83(166.99-178.66) | 23  | -0.03(-0.15,0.08)  | -0.12(-0.17,-0.07) | -0.62(-0.71,-0.53) | -0.24(-0.29,-0.18) | 29  |
| Luxembourg               | 221.32(213.87-228.95) | 14  | 212.07(204.68-219.30) | 11  | -0.15(-0.18,-0.12) | -0.16(-0.16,-0.15) | -0.13(-0.16,-0.11) | -0.15(-0.16,-0.14) | 9   |
| Malta                    | 231.18(223.17-239.56) | 8   | 211.56(203.96-218.96) | 12  | -0.38(-0.39,-0.36) | -0.26(-0.27,-0.26) | -0.27(-0.28,-0.26) | -0.31(-0.31,-0.30) | 45  |
| Netherlands              | 227.96(220.01-235.90) | 12  | 215.61(207.84-223.43) | 10  | -0.24(-0.24,-0.23) | -0.18(-0.19,-0.16) | -0.16(-0.17,-0.16) | -0.19(-0.20,-0.19) | 15  |
| Norway                   | 173.44(167.91-179.11) | 24  | 165.30(160.02-170.69) | 24  | -0.20(-0.21,-0.19) | -0.20(-0.21,-0.19) | -0.12(-0.23,-0.01) | -0.17(-0.21,-0.14) | 11  |
| Portugal                 | 244.58(235.64-253.11) | 4   | 223.65(215.51-231.76) | 4   | -0.38(-0.39,-0.38) | -0.28(-0.29,-0.28) | -0.26(-0.26,-0.26) | -0.31(-0.31,-0.30) | 46  |
| Spain                    | 224.61(215.33-233.61) | 13  | 208.98(200.67-217.33) | 13  | -0.33(-0.34,-0.32) | -0.21(-0.21,-0.20) | -0.21(-0.23,-0.19) | -0.25(-0.25,-0.24) | 34  |
| Sweden                   | 179.42(173.08-185.66) | 23  | 175.79(169.54-181.99) | 22  | -0.17(-0.18,-0.15) | -0.04(-0.07,-0.02) | -0.03(-0.10,0.05)  | -0.08(-0.11,-0.05) | 3   |
| Switzerland              | 211.82(204.19-218.85) | 20  | 203.90(196.94-211.48) | 19  | -0.14(-0.17,-0.11) | -0.13(-0.13,-0.13) | -0.13(-0.13,-0.13) | -0.13(-0.14,-0.12) | 6   |
| United Kingdom           | 218.28(211.54-225.22) | 16  | 201.59(195.40-207.84) | 20  | -0.32(-0.34,-0.30) | -0.25(-0.26,-0.25) | -0.24(-0.27,-0.22) | -0.27(-0.28,-0.26) | 39  |
| Argentina                | 110.06(105.41-114.87) | 29  | 102.87(98.53-107.31)  | 28  | -0.33(-0.34,-0.32) | -0.15(-0.16,-0.14) | -0.25(-0.29,-0.20) | -0.24(-0.25,-0.22) | 30  |
| Chile                    | 110.63(105.77-115.35) | 28  | 100.16(95.92-104.24)  | 30  | -0.42(-0.45,-0.38) | -0.30(-0.32,-0.28) | -0.33(-0.35,-0.31) | -0.35(-0.36,-0.33) | 54  |
| Uruguay                  | 108.41(103.89-113.18) | 30  | 101.79(97.46-106.31)  | 29  | -0.22(-0.26,-0.19) | -0.13(-0.14,-0.11) | -0.30(-0.31,-0.28) | -0.22(-0.24,-0.21) | 23  |
| Canada                   | 96.34(93.05-99.37)    | 33  | 88.50(85.65-91.68)    | 34  | -0.34(-0.35,-0.33) | -0.34(-0.34,-0.34) | -0.20(-0.21,-0.19) | -0.29(-0.30,-0.29) | 42  |
| United States of America | 105.99(102.67-109.14) | 32  | 93.16(90.26-96.00)    | 31  | -0.03(-0.08,0.02)  | -1.06(-1.16,-0.97) | -0.17(-0.22,-0.12) | -0.47(-0.51,-0.42) | 99  |
| Antigua and Barbuda      | 55.61(53.29-57.95)    | 107 | 50.27(48.20-52.37)    | 97  | -0.40(-0.41,-0.40) | -0.40(-0.41,-0.40) | -0.25(-0.27,-0.23) | -0.35(-0.36,-0.34) | 55  |

|                                    |                       |     |                    |     |                    |                    |                    |                    |     |
|------------------------------------|-----------------------|-----|--------------------|-----|--------------------|--------------------|--------------------|--------------------|-----|
| Bahamas                            | 53.85(51.73-56.09)    | 109 | 50.00(47.92-52.02) | 100 | -0.28(-0.39,-0.16) | -0.34(-0.37,-0.30) | -0.11(-0.16,-0.07) | -0.25(-0.29,-0.21) | 35  |
| Barbados                           | 52.64(50.52-54.79)    | 114 | 49.07(47.09-51.16) | 103 | -0.25(-0.29,-0.22) | -0.32(-0.35,-0.30) | -0.16(-0.17,-0.14) | -0.24(-0.25,-0.22) | 31  |
| Belize                             | 65.86(63.19-68.43)    | 85  | 56.46(54.18-58.82) | 77  | -0.77(-0.80,-0.75) | -0.54(-0.56,-0.52) | -0.25(-0.27,-0.23) | -0.52(-0.54,-0.51) | 110 |
| Cuba                               | 58.32(56.05-60.82)    | 99  | 54.66(52.41-56.96) | 81  | -0.03(-0.04,-0.02) | -0.28(-0.30,-0.26) | -0.39(-0.40,-0.38) | -0.22(-0.23,-0.21) | 24  |
| Dominica                           | 56.88(54.74-59.23)    | 102 | 50.52(48.55-52.56) | 96  | -0.54(-0.55,-0.53) | -0.47(-0.49,-0.46) | -0.20(-0.22,-0.18) | -0.41(-0.42,-0.40) | 73  |
| Dominican Republic                 | 65.10(62.30-67.89)    | 88  | 57.03(54.64-59.37) | 73  | -0.11(-0.13,-0.08) | -0.96(-1.00,-0.93) | -0.38(-0.44,-0.33) | -0.46(-0.49,-0.44) | 97  |
| Grenada                            | 61.08(58.56-63.71)    | 93  | 52.27(50.08-54.46) | 90  | -1.00(-1.02,-0.98) | -0.33(-0.35,-0.31) | -0.31(-0.35,-0.27) | -0.53(-0.54,-0.51) | 114 |
| Guyana                             | 58.22(55.81-60.54)    | 100 | 52.04(49.88-54.12) | 91  | -0.45(-0.48,-0.42) | -0.26(-0.28,-0.25) | -0.42(-0.44,-0.40) | -0.38(-0.40,-0.37) | 65  |
| Haiti                              | 71.89(68.95-74.80)    | 58  | 65.21(62.59-67.80) | 44  | -0.39(-0.42,-0.36) | -0.34(-0.35,-0.32) | -0.26(-0.27,-0.24) | -0.33(-0.34,-0.32) | 49  |
| Jamaica                            | 59.72(57.19-62.16)    | 96  | 52.88(50.77-55.16) | 86  | -0.49(-0.50,-0.49) | -0.45(-0.47,-0.44) | -0.28(-0.30,-0.25) | -0.41(-0.42,-0.40) | 74  |
| Saint Lucia                        | 59.44(57.05-61.96)    | 97  | 52.44(50.23-54.64) | 88  | -0.70(-0.71,-0.70) | -0.33(-0.33,-0.32) | -0.24(-0.25,-0.22) | -0.43(-0.43,-0.42) | 83  |
| Saint Vincent and the Grenadines   | 61.08(58.53-63.50)    | 92  | 53.88(51.51-56.14) | 85  | -0.58(-0.59,-0.57) | -0.39(-0.40,-0.38) | -0.32(-0.35,-0.30) | -0.43(-0.44,-0.42) | 84  |
| Suriname                           | 56.43(54.17-58.73)    | 104 | 50.84(48.83-52.86) | 95  | -0.27(-0.29,-0.26) | -0.50(-0.51,-0.48) | -0.31(-0.31,-0.30) | -0.36(-0.36,-0.35) | 56  |
| Trinidad and Tobago                | 53.06(50.95-55.34)    | 112 | 47.63(45.67-49.64) | 104 | -0.42(-0.44,-0.40) | -0.51(-0.54,-0.48) | -0.17(-0.18,-0.15) | -0.37(-0.38,-0.35) | 59  |
| Bolivia (Plurinational State of)   | 107.26(102.83-111.79) | 31  | 92.16(88.06-96.08) | 32  | -0.71(-0.72,-0.69) | -0.44(-0.49,-0.39) | -0.48(-0.52,-0.43) | -0.53(-0.55,-0.51) | 115 |
| Ecuador                            | 89.02(85.11-93.12)    | 38  | 76.72(73.47-80.21) | 37  | -0.43(-0.54,-0.32) | -0.55(-0.56,-0.53) | -0.55(-0.56,-0.53) | -0.51(-0.55,-0.48) | 108 |
| Peru                               | 93.85(89.77-98.01)    | 36  | 81.88(78.21-85.25) | 36  | -0.35(-0.50,-0.20) | -0.40(-0.43,-0.37) | -0.71(-0.77,-0.64) | -0.48(-0.53,-0.43) | 102 |
| Colombia                           | 22.02(21.17-22.83)    | 200 | 19.17(18.44-19.94) | 201 | -0.47(-0.56,-0.37) | -0.39(-0.50,-0.28) | -0.55(-0.58,-0.53) | -0.48(-0.53,-0.43) | 103 |
| Costa Rica                         | 21.66(20.82-22.47)    | 202 | 19.02(18.25-19.74) | 202 | -0.61(-0.69,-0.53) | -0.37(-0.38,-0.36) | -0.37(-0.38,-0.36) | -0.44(-0.47,-0.42) | 88  |
| El Salvador                        | 24.96(23.97-25.88)    | 194 | 21.31(20.46-22.19) | 196 | -0.56(-0.60,-0.52) | -0.63(-0.66,-0.59) | -0.40(-0.42,-0.38) | -0.54(-0.56,-0.52) | 118 |
| Guatemala                          | 27.23(26.19-28.31)    | 183 | 22.59(21.68-23.47) | 191 | -0.82(-0.84,-0.79) | -0.64(-0.65,-0.62) | -0.44(-0.47,-0.42) | -0.63(-0.65,-0.62) | 149 |
| Honduras                           | 26.78(25.73-27.91)    | 186 | 23.18(22.34-24.14) | 188 | -0.66(-0.71,-0.61) | -0.46(-0.50,-0.42) | -0.32(-0.33,-0.30) | -0.49(-0.51,-0.46) | 105 |
| Mexico                             | 24.06(23.18-24.93)    | 197 | 21.09(20.32-21.89) | 197 | -0.61(-0.63,-0.60) | -0.34(-0.34,-0.33) | -0.40(-0.41,-0.38) | -0.46(-0.46,-0.45) | 98  |
| Nicaragua                          | 26.02(25.02-27.03)    | 192 | 22.20(21.36-23.11) | 193 | -0.74(-0.81,-0.66) | -0.45(-0.46,-0.44) | -0.45(-0.46,-0.44) | -0.54(-0.56,-0.52) | 119 |
| Panama                             | 21.19(20.42-22.01)    | 203 | 18.78(18.06-19.47) | 203 | -0.43(-0.58,-0.29) | -0.36(-0.38,-0.34) | -0.47(-0.56,-0.37) | -0.42(-0.47,-0.36) | 77  |
| Venezuela (Bolivarian Republic of) | 21.87(21.02-22.67)    | 201 | 19.93(19.15-20.69) | 199 | -0.50(-0.58,-0.43) | -0.24(-0.37,-0.11) | -0.15(-0.22,-0.08) | -0.31(-0.37,-0.25) | 47  |
| Brazil                             | 92.30(89.11-95.31)    | 37  | 87.04(84.04-89.94) | 35  | -0.24(-0.26,-0.23) | -0.15(-0.17,-0.12) | -0.20(-0.22,-0.18) | -0.19(-0.21,-0.18) | 16  |
| Paraguay                           | 94.78(90.72-98.87)    | 35  | 90.11(86.20-94.15) | 33  | -0.18(-0.21,-0.14) | -0.07(-0.08,-0.05) | -0.26(-0.28,-0.24) | -0.17(-0.19,-0.15) | 12  |
| Algeria                            | 67.92(65.07-70.65)    | 77  | 54.17(52.08-56.37) | 83  | -0.92(-0.93,-0.91) | -0.80(-0.84,-0.77) | -0.63(-0.67,-0.59) | -0.78(-0.80,-0.76) | 179 |
| Bahrain                            | 60.78(58.28-63.34)    | 95  | 49.92(48.02-51.90) | 101 | -0.66(-0.68,-0.65) | -0.83(-0.86,-0.80) | -0.56(-0.60,-0.52) | -0.68(-0.69,-0.66) | 167 |
| Egypt                              | 43.36(41.50-45.06)    | 126 | 34.52(33.29-35.81) | 135 | -1.09(-1.15,-1.03) | -0.52(-0.55,-0.49) | -0.78(-0.84,-0.72) | -0.78(-0.81,-0.74) | 180 |
| Iran (Islamic Republic of)         | 71.61(69.16-73.98)    | 59  | 54.44(52.53-56.26) | 82  | -0.91(-0.95,-0.86) | -1.23(-1.27,-1.18) | -0.68(-0.69,-0.67) | -0.93(-0.96,-0.91) | 196 |
| Iraq                               | 79.30(75.91-82.68)    | 40  | 60.85(58.49-63.28) | 50  | -0.60(-0.68,-0.53) | -0.92(-0.96,-0.87) | -1.26(-1.31,-1.20) | -0.93(-0.96,-0.89) | 197 |
| Jordan                             | 64.85(62.04-67.48)    | 89  | 51.73(49.67-53.72) | 92  | -0.76(-0.78,-0.75) | -0.85(-0.86,-0.84) | -0.69(-0.71,-0.68) | -0.77(-0.78,-0.77) | 178 |
| Kuwait                             | 56.06(53.74-58.58)    | 106 | 46.60(44.77-48.35) | 109 | -0.53(-0.71,-0.35) | -0.79(-0.82,-0.76) | -0.59(-0.65,-0.54) | -0.65(-0.71,-0.59) | 155 |
| Lebanon                            | 67.89(65.16-70.67)    | 78  | 52.71(50.65-54.76) | 87  | -0.72(-0.73,-0.71) | -1.04(-1.04,-1.03) | -0.84(-0.85,-0.83) | -0.87(-0.88,-0.86) | 191 |
| Libya                              | 64.75(62.12-67.53)    | 90  | 50.26(48.33-52.36) | 98  | -1.39(-1.47,-1.31) | -0.96(-0.98,-0.93) | -0.21(-0.24,-0.18) | -0.86(-0.89,-0.83) | 190 |
| Morocco                            | 75.21(72.16-78.34)    | 48  | 60.20(57.80-62.55) | 54  | -0.67(-0.68,-0.65) | -0.80(-0.82,-0.77) | -0.82(-0.84,-0.81) | -0.76(-0.78,-0.75) | 177 |

|                                  |                    |     |                    |     |                    |                    |                    |                    |     |
|----------------------------------|--------------------|-----|--------------------|-----|--------------------|--------------------|--------------------|--------------------|-----|
| Palestine                        | 76.80(73.54-79.98) | 46  | 56.99(54.75-59.21) | 74  | -1.18(-1.22,-1.13) | -0.95(-1.09,-0.81) | -0.97(-1.06,-0.88) | -1.04(-1.10,-0.98) | 201 |
| Oman                             | 66.98(64.30-69.74) | 82  | 46.94(45.08-48.79) | 107 | -1.77(-1.78,-1.75) | -1.17(-1.20,-1.14) | -0.72(-0.74,-0.70) | -1.22(-1.23,-1.20) | 202 |
| Qatar                            | 58.71(56.28-61.09) | 98  | 45.78(43.96-47.63) | 110 | -1.01(-1.02,-1.00) | -0.86(-0.87,-0.86) | -0.68(-0.69,-0.67) | -0.85(-0.86,-0.85) | 189 |
| Saudi Arabia                     | 71.06(67.99-74.32) | 63  | 47.26(45.31-49.08) | 106 | -1.98(-2.02,-1.93) | -1.29(-1.31,-1.27) | -0.90(-0.93,-0.88) | -1.39(-1.41,-1.37) | 203 |
| Syrian Arab Republic             | 73.00(70.12-75.86) | 55  | 57.27(55.01-59.55) | 71  | -1.05(-1.06,-1.03) | -0.96(-0.98,-0.95) | -0.45(-0.46,-0.43) | -0.83(-0.84,-0.82) | 187 |
| Tunisia                          | 69.27(66.29-72.12) | 72  | 54.81(52.71-57.01) | 80  | -0.97(-1.00,-0.94) | -0.83(-0.87,-0.79) | -0.59(-0.61,-0.58) | -0.80(-0.82,-0.78) | 183 |
| Turkey                           | 95.39(91.46-99.34) | 34  | 74.72(71.90-77.54) | 38  | -0.92(-0.92,-0.91) | -0.82(-0.82,-0.81) | -0.78(-0.83,-0.73) | -0.84(-0.85,-0.82) | 188 |
| United Arab Emirates             | 57.08(54.76-59.46) | 101 | 43.97(42.21-45.67) | 112 | -1.26(-1.28,-1.24) | -1.06(-1.08,-1.05) | -0.32(-0.37,-0.26) | -0.89(-0.91,-0.87) | 193 |
| Yemen                            | 78.31(75.33-81.37) | 43  | 60.54(58.09-62.97) | 52  | -0.86(-0.88,-0.83) | -1.26(-1.27,-1.24) | -0.52(-0.56,-0.47) | -0.89(-0.91,-0.87) | 194 |
| Afghanistan                      | 85.84(82.40-89.32) | 39  | 70.94(68.26-73.78) | 39  | -0.15(-0.18,-0.13) | -0.90(-0.91,-0.88) | -0.91(-0.95,-0.86) | -0.65(-0.67,-0.63) | 156 |
| Bangladesh                       | 46.83(45.16-48.62) | 118 | 39.21(37.70-40.66) | 123 | -0.71(-0.73,-0.69) | -0.41(-0.42,-0.40) | -0.73(-0.73,-0.72) | -0.61(-0.61,-0.60) | 140 |
| Bhutan                           | 48.73(46.96-50.52) | 115 | 41.07(39.60-42.60) | 115 | -0.54(-0.55,-0.52) | -0.63(-0.64,-0.62) | -0.58(-0.59,-0.57) | -0.59(-0.59,-0.58) | 135 |
| India                            | 48.61(46.95-50.32) | 116 | 45.72(44.12-47.31) | 111 | 0.13(0.12,0.14)    | -0.30(-0.31,-0.29) | -0.50(-0.53,-0.46) | -0.21(-0.22,-0.20) | 22  |
| Nepal                            | 45.35(43.74-46.96) | 120 | 34.99(33.78-36.33) | 131 | -0.78(-0.82,-0.74) | -1.08(-1.09,-1.07) | -0.76(-0.88,-0.64) | -0.89(-0.93,-0.85) | 195 |
| Pakistan                         | 48.53(46.87-50.26) | 117 | 41.09(39.61-42.57) | 114 | -0.58(-0.60,-0.56) | -0.61(-0.63,-0.60) | -0.51(-0.52,-0.50) | -0.58(-0.58,-0.57) | 132 |
| Angola                           | 65.95(63.15-68.87) | 83  | 51.33(49.14-53.50) | 93  | -0.72(-0.83,-0.61) | -0.72(-0.77,-0.67) | -1.20(-1.22,-1.17) | -0.88(-0.91,-0.84) | 192 |
| Central African Republic         | 65.67(62.93-68.40) | 87  | 57.71(55.20-60.21) | 67  | -0.43(-0.45,-0.41) | -0.44(-0.48,-0.40) | -0.46(-0.48,-0.44) | -0.45(-0.47,-0.43) | 92  |
| Congo                            | 54.58(52.27-57.21) | 108 | 43.44(41.58-45.37) | 113 | -0.68(-0.71,-0.65) | -0.74(-0.76,-0.72) | -0.91(-0.97,-0.85) | -0.78(-0.80,-0.76) | 181 |
| Democratic Republic of the Congo | 61.08(58.45-63.86) | 94  | 52.29(49.99-54.59) | 89  | -0.11(-0.20,-0.02) | -0.23(-0.33,-0.14) | -1.35(-1.41,-1.29) | -0.55(-0.61,-0.50) | 120 |
| Equatorial Guinea                | 65.80(62.91-68.68) | 86  | 40.70(38.90-42.61) | 116 | -1.56(-1.61,-1.51) | -2.17(-2.19,-2.15) | -1.20(-1.28,-1.12) | -1.66(-1.69,-1.62) | 204 |
| Gabon                            | 53.10(50.70-55.46) | 111 | 40.65(38.89-42.35) | 117 | -0.95(-0.99,-0.90) | -0.76(-0.79,-0.72) | -1.07(-1.11,-1.04) | -0.93(-0.95,-0.90) | 198 |
| Burundi                          | 27.28(26.19-28.36) | 182 | 26.50(25.49-27.49) | 173 | -0.07(-0.09,-0.05) | 0.00(-0.07,0.06)   | -0.23(-0.29,-0.16) | -0.11(-0.14,-0.08) | 4   |
| Comoros                          | 26.69(25.66-27.77) | 189 | 24.36(23.41-25.30) | 181 | -0.44(-0.46,-0.41) | -0.21(-0.24,-0.17) | -0.33(-0.34,-0.31) | -0.32(-0.33,-0.30) | 48  |
| Djibouti                         | 26.80(25.80-27.89) | 185 | 23.96(23.08-24.87) | 186 | -0.28(-0.31,-0.25) | -0.48(-0.51,-0.45) | -0.41(-0.44,-0.38) | -0.39(-0.41,-0.37) | 67  |
| Eritrea                          | 29.31(28.15-30.46) | 175 | 25.98(25.02-27.02) | 177 | -0.80(-0.88,-0.72) | -0.14(-0.17,-0.11) | -0.36(-0.38,-0.33) | -0.42(-0.45,-0.39) | 78  |
| Ethiopia                         | 28.67(27.65-29.68) | 178 | 25.59(24.70-26.50) | 178 | -0.34(-0.43,-0.26) | -0.26(-0.30,-0.23) | -0.60(-0.62,-0.58) | -0.40(-0.43,-0.37) | 71  |
| Kenya                            | 24.36(23.49-25.24) | 195 | 22.19(21.39-23.00) | 194 | -0.48(-0.50,-0.46) | -0.06(-0.10,-0.02) | -0.42(-0.44,-0.41) | -0.33(-0.35,-0.31) | 50  |
| Madagascar                       | 28.36(27.26-29.52) | 180 | 26.39(25.45-27.39) | 175 | -0.17(-0.21,-0.12) | -0.17(-0.21,-0.14) | -0.44(-0.47,-0.41) | -0.26(-0.28,-0.23) | 37  |
| Malawi                           | 29.07(27.96-30.24) | 176 | 26.32(25.27-27.38) | 176 | -0.30(-0.48,-0.11) | -0.28(-0.37,-0.19) | -0.54(-0.58,-0.50) | -0.37(-0.44,-0.30) | 60  |
| Mauritius                        | 26.18(25.17-27.15) | 191 | 22.62(21.70-23.54) | 190 | -0.56(-0.59,-0.53) | -0.52(-0.53,-0.52) | -0.43(-0.47,-0.39) | -0.50(-0.52,-0.48) | 107 |
| Mozambique                       | 31.66(30.46-32.91) | 171 | 27.95(26.95-29.04) | 168 | -0.40(-0.49,-0.31) | -0.32(-0.40,-0.23) | -0.57(-0.60,-0.55) | -0.45(-0.49,-0.40) | 93  |
| Rwanda                           | 24.30(22.94-25.67) | 196 | 21.77(20.63-22.92) | 195 | -0.35(-0.42,-0.29) | -0.25(-0.31,-0.19) | -0.52(-0.54,-0.51) | -0.39(-0.42,-0.36) | 68  |
| Seychelles                       | 23.38(22.47-24.34) | 199 | 20.68(19.83-21.47) | 198 | -0.66(-0.69,-0.64) | -0.30(-0.32,-0.28) | -0.32(-0.35,-0.30) | -0.42(-0.44,-0.41) | 79  |
| Somalia                          | 31.49(30.27-32.72) | 172 | 31.41(30.24-32.59) | 155 | -0.11(-0.17,-0.05) | 0.15(0.09,0.20)    | -0.05(-0.07,-0.04) | -0.02(-0.04,0.01)  | 2   |
| United Republic of Tanzania      | 27.07(25.52-28.61) | 184 | 24.24(22.96-25.56) | 183 | -0.43(-0.50,-0.36) | -0.22(-0.25,-0.19) | -0.53(-0.55,-0.52) | -0.39(-0.41,-0.36) | 69  |
| Uganda                           | 27.86(26.84-28.93) | 181 | 24.02(23.12-24.95) | 184 | -0.36(-0.51,-0.20) | -0.63(-0.65,-0.61) | -0.54(-0.63,-0.45) | -0.52(-0.57,-0.46) | 111 |
| Zambia                           | 26.75(25.76-27.79) | 187 | 23.67(22.81-24.55) | 187 | -0.28(-0.34,-0.23) | -0.36(-0.52,-0.19) | -0.65(-0.81,-0.49) | -0.44(-0.51,-0.36) | 89  |
| Botswana                         | 37.97(36.52-39.47) | 144 | 31.67(30.41-33.02) | 151 | -0.95(-0.99,-0.90) | -0.66(-0.79,-0.54) | -0.25(-0.31,-0.20) | -0.64(-0.69,-0.59) | 152 |



|                          |                       |     |                       |     |                    |                    |                    |                    |     |
|--------------------------|-----------------------|-----|-----------------------|-----|--------------------|--------------------|--------------------|--------------------|-----|
| Lesotho                  | 43.53(41.74-45.34)    | 125 | 37.16(35.66-38.64)    | 125 | -0.86(-1.00,-0.72) | -0.35(-0.43,-0.28) | -0.52(-0.54,-0.49) | -0.56(-0.62,-0.51) | 122 |
| Namibia                  | 37.52(35.97-39.08)    | 147 | 32.26(30.95-33.59)    | 147 | -0.72(-0.89,-0.55) | -0.36(-0.45,-0.28) | -0.59(-0.63,-0.56) | -0.55(-0.61,-0.48) | 121 |
| South Africa             | 35.96(34.75-37.23)    | 154 | 32.06(30.91-33.19)    | 149 | -0.51(-0.58,-0.45) | -0.40(-0.64,-0.16) | -0.33(-0.42,-0.24) | -0.43(-0.52,-0.34) | 85  |
| Eswatini                 | 39.97(38.36-41.61)    | 133 | 34.14(32.74-35.60)    | 138 | -0.82(-0.87,-0.77) | -0.45(-0.57,-0.33) | -0.38(-0.43,-0.33) | -0.57(-0.62,-0.52) | 127 |
| Zimbabwe                 | 38.34(36.85-39.93)    | 140 | 35.82(34.34-37.36)    | 128 | -0.65(-0.70,-0.61) | 0.35(0.30,0.40)    | -0.48(-0.53,-0.42) | -0.25(-0.28,-0.23) | 36  |
| Benin                    | 36.70(35.39-38.06)    | 152 | 31.00(29.85-32.16)    | 159 | -0.99(-1.37,-0.60) | -0.33(-0.54,-0.12) | -0.63(-0.70,-0.56) | -0.62(-0.77,-0.48) | 144 |
| Burkina Faso             | 39.43(37.94-40.91)    | 136 | 33.98(32.74-35.25)    | 140 | -0.83(-1.22,-0.43) | -0.36(-0.59,-0.12) | -0.55(-0.62,-0.47) | -0.56(-0.72,-0.40) | 123 |
| Cameroon                 | 33.25(32.04-34.50)    | 166 | 27.79(26.77-28.83)    | 169 | -0.89(-1.00,-0.79) | -0.46(-0.90,-0.02) | -0.62(-0.73,-0.52) | -0.67(-0.81,-0.52) | 161 |
| Cabo Verde               | 35.61(34.26-36.89)    | 158 | 28.52(27.47-29.61)    | 167 | -1.12(-1.58,-0.65) | -0.67(-0.73,-0.62) | -0.67(-0.73,-0.62) | -0.81(-0.96,-0.66) | 184 |
| Chad                     | 40.64(39.17-42.18)    | 130 | 34.83(33.51-36.08)    | 134 | -0.73(-1.01,-0.45) | -0.26(-0.59,0.08)  | -0.68(-0.75,-0.61) | -0.58(-0.73,-0.44) | 133 |
| Cote d'Ivoire            | 34.95(33.66-36.27)    | 161 | 29.60(28.52-30.71)    | 164 | -1.03(-1.27,-0.79) | -0.23(-0.35,-0.10) | -0.62(-0.67,-0.57) | -0.60(-0.69,-0.51) | 138 |
| Gambia                   | 37.53(36.15-38.92)    | 146 | 31.09(29.91-32.24)    | 157 | -1.03(-1.41,-0.65) | -0.46(-0.67,-0.25) | -0.65(-0.72,-0.58) | -0.69(-0.84,-0.55) | 168 |
| Ghana                    | 39.47(37.64-41.36)    | 135 | 32.96(31.41-34.49)    | 143 | -0.72(-1.04,-0.39) | -0.43(-0.81,-0.05) | -0.79(-0.87,-0.71) | -0.67(-0.84,-0.50) | 162 |
| Guinea                   | 37.92(36.50-39.27)    | 145 | 32.46(31.28-33.65)    | 145 | -0.93(-1.30,-0.57) | -0.33(-0.53,-0.12) | -0.50(-0.56,-0.44) | -0.57(-0.71,-0.42) | 128 |
| Guinea-Bissau            | 38.04(36.65-39.42)    | 143 | 32.08(30.90-33.21)    | 148 | -1.01(-1.37,-0.64) | -0.36(-0.57,-0.15) | -0.59(-0.65,-0.53) | -0.63(-0.77,-0.49) | 150 |
| Liberia                  | 35.53(34.25-36.86)    | 159 | 30.59(29.49-31.72)    | 160 | -0.23(-0.40,-0.05) | -0.75(-0.79,-0.72) | -0.57(-0.87,-0.26) | -0.53(-0.64,-0.42) | 116 |
| Mali                     | 34.78(32.96-36.54)    | 163 | 28.69(27.19-30.16)    | 166 | -0.80(-0.91,-0.68) | -0.73(-1.14,-0.32) | -0.60(-0.76,-0.45) | -0.73(-0.88,-0.58) | 174 |
| Mauritania               | 35.82(34.51-37.18)    | 156 | 29.99(28.83-31.11)    | 162 | -1.00(-1.12,-0.89) | -0.41(-0.91,0.08)  | -0.56(-0.68,-0.45) | -0.67(-0.83,-0.51) | 163 |
| Niger                    | 41.67(40.14-43.18)    | 129 | 37.20(35.84-38.61)    | 124 | -0.73(-0.93,-0.54) | -0.05(-0.28,0.18)  | -0.41(-0.46,-0.37) | -0.43(-0.53,-0.33) | 86  |
| Nigeria                  | 44.40(42.85-45.94)    | 122 | 33.38(32.21-34.54)    | 141 | -0.57(-0.61,-0.53) | -1.04(-1.07,-1.01) | -1.30(-1.38,-1.23) | -0.99(-1.02,-0.96) | 200 |
| Sao Tome and Principe    | 32.75(31.59-33.91)    | 168 | 26.88(25.89-27.87)    | 171 | -0.83(-1.15,-0.52) | -0.49(-0.86,-0.13) | -0.79(-0.86,-0.72) | -0.73(-0.90,-0.57) | 175 |
| Senegal                  | 37.00(35.61-38.38)    | 150 | 31.57(30.41-32.75)    | 153 | -0.93(-1.29,-0.57) | -0.30(-0.50,-0.10) | -0.60(-0.66,-0.53) | -0.59(-0.72,-0.45) | 136 |
| Sierra Leone             | 36.79(35.47-38.16)    | 151 | 31.64(30.48-32.83)    | 152 | -0.65(-0.90,-0.40) | -0.28(-0.58,0.03)  | -0.71(-0.77,-0.65) | -0.57(-0.70,-0.44) | 129 |
| Togo                     | 34.88(33.63-36.19)    | 162 | 29.76(28.68-30.89)    | 163 | -0.91(-1.13,-0.68) | -0.13(-0.39,0.14)  | -0.64(-0.69,-0.58) | -0.59(-0.71,-0.47) | 137 |
| American Samoa           | 35.96(34.49-37.46)    | 155 | 31.86(30.60-33.15)    | 150 | -0.48(-0.64,-0.32) | -0.29(-0.33,-0.26) | -0.51(-0.74,-0.29) | -0.42(-0.51,-0.33) | 80  |
| Bermuda                  | 56.54(54.25-58.88)    | 103 | 51.18(49.15-53.31)    | 94  | -0.31(-0.34,-0.28) | -0.44(-0.46,-0.42) | -0.24(-0.26,-0.21) | -0.34(-0.36,-0.32) | 52  |
| Cook Islands             | 35.73(34.22-37.20)    | 157 | 31.08(29.83-32.32)    | 158 | -0.52(-0.58,-0.46) | -0.43(-0.46,-0.41) | -0.53(-0.56,-0.50) | -0.49(-0.51,-0.46) | 106 |
| Greenland                | 116.63(113.04-120.46) | 27  | 104.62(101.11-108.13) | 27  | -0.27(-0.29,-0.24) | -0.54(-0.55,-0.53) | -0.29(-0.35,-0.23) | -0.38(-0.40,-0.36) | 66  |
| Guam                     | 32.96(31.62-34.29)    | 167 | 29.14(27.91-30.31)    | 165 | -0.53(-0.60,-0.46) | -0.41(-0.48,-0.35) | -0.37(-0.42,-0.32) | -0.44(-0.48,-0.41) | 90  |
| Monaco                   | 212.91(205.91-220.32) | 18  | 204.47(197.34-211.67) | 18  | -0.17(-0.20,-0.14) | -0.12(-0.13,-0.12) | -0.12(-0.13,-0.12) | -0.14(-0.15,-0.13) | 7   |
| Nauru                    | 35.23(33.75-36.62)    | 160 | 31.45(30.20-32.72)    | 154 | -0.09(-0.12,-0.07) | -0.18(-0.25,-0.11) | -0.86(-1.03,-0.69) | -0.37(-0.44,-0.30) | 61  |
| Niue                     | 37.30(35.76-38.87)    | 149 | 32.39(31.12-33.75)    | 146 | -0.53(-0.57,-0.50) | -0.51(-0.52,-0.51) | -0.40(-0.44,-0.36) | -0.48(-0.50,-0.47) | 104 |
| Northern Mariana Islands | 33.59(32.22-35.08)    | 165 | 31.14(29.94-32.41)    | 156 | -0.55(-0.64,-0.46) | -0.08(-0.13,-0.04) | -0.19(-0.26,-0.12) | -0.26(-0.30,-0.22) | 38  |
| Palau                    | 33.92(32.51-35.35)    | 164 | 30.27(28.96-31.54)    | 161 | -0.47(-0.52,-0.41) | -0.33(-0.34,-0.31) | -0.39(-0.50,-0.28) | -0.39(-0.43,-0.35) | 70  |
| Puerto Rico              | 52.86(50.71-55.09)    | 113 | 47.58(45.66-49.54)    | 105 | -0.38(-0.39,-0.37) | -0.40(-0.40,-0.40) | -0.31(-0.32,-0.29) | -0.36(-0.37,-0.36) | 57  |
| Saint Kitts and Nevis    | 56.34(54.02-58.72)    | 105 | 49.87(47.91-51.88)    | 102 | -0.55(-0.56,-0.55) | -0.38(-0.39,-0.38) | -0.30(-0.31,-0.29) | -0.42(-0.42,-0.41) | 81  |
| San Marino               | 217.46(210.13-225.23) | 17  | 207.65(200.21-215.07) | 14  | -0.26(-0.27,-0.24) | -0.12(-0.12,-0.12) | -0.09(-0.11,-0.07) | -0.16(-0.17,-0.15) | 10  |
| Tokelau                  | 38.26(36.73-39.81)    | 141 | 32.50(31.18-33.84)    | 144 | -0.51(-0.52,-0.50) | -0.55(-0.56,-0.53) | -0.62(-0.67,-0.58) | -0.56(-0.57,-0.54) | 124 |

|                                       |                       |     |                       |     |                    |                    |                    |                    |     |
|---------------------------------------|-----------------------|-----|-----------------------|-----|--------------------|--------------------|--------------------|--------------------|-----|
| Tuvalu                                | 39.16(37.57-40.74)    | 139 | 34.06(32.61-35.44)    | 139 | -0.66(-0.69,-0.64) | -0.34(-0.35,-0.33) | -0.45(-0.51,-0.39) | -0.47(-0.49,-0.45) | 100 |
| United States Virgin Islands          | 53.53(51.37-55.78)    | 110 | 46.89(45.04-48.87)    | 108 | -0.57(-0.60,-0.53) | -0.55(-0.57,-0.54) | -0.23(-0.25,-0.20) | -0.45(-0.47,-0.44) | 94  |
| South Sudan                           | 26.71(25.67-27.78)    | 188 | 25.25(24.33-26.23)    | 180 | -0.19(-0.25,-0.14) | -0.07(-0.13,-0.02) | -0.31(-0.32,-0.29) | -0.20(-0.23,-0.18) | 19  |
| Sudan                                 | 74.87(71.78-78.08)    | 51  | 56.57(54.42-58.88)    | 76  | -0.91(-0.91,-0.90) | -0.98(-0.98,-0.97) | -0.99(-1.00,-0.98) | -0.96(-0.97,-0.96) | 199 |
| <i>Atopic dermatitis</i>              |                       |     |                       |     |                    |                    |                    |                    |     |
| China                                 | 409.40(393.09-424.47) | 71  | 411.13(394.14-427.17) | 71  | -0.10(-0.12,-0.08) | 0.06(0.05,0.07)    | 0.08(0.04,0.12)    | 0.01(0.00,0.03)    | 24  |
| Democratic People's Republic of Korea | 466.50(436.16-496.44) | 51  | 456.72(427.20-485.76) | 52  | -0.03(-0.05,-0.02) | -0.13(-0.13,-0.12) | -0.05(-0.06,-0.05) | -0.07(-0.08,-0.07) | 195 |
| Taiwan (Province of China)            | 520.79(484.33-556.34) | 14  | 529.40(495.43-566.74) | 13  | -0.12(-0.14,-0.11) | 0.14(0.14,0.15)    | 0.14(0.12,0.15)    | 0.06(0.05,0.07)    | 4   |
| Cambodia                              | 521.30(488.43-556.85) | 13  | 510.76(478.78-544.45) | 17  | -0.08(-0.08,-0.07) | -0.07(-0.07,-0.07) | -0.06(-0.06,-0.06) | -0.07(-0.07,-0.07) | 196 |
| Indonesia                             | 565.43(541.84-589.05) | 11  | 565.75(540.52-589.69) | 11  | -0.02(-0.02,-0.02) | 0.04(0.03,0.05)    | -0.01(-0.01,0.00)  | 0.00(0.00,0.00)    | 43  |
| Lao People's Democratic Republic      | 515.04(482.64-549.23) | 17  | 508.33(476.44-542.24) | 21  | -0.07(-0.07,-0.07) | -0.05(-0.06,-0.05) | -0.02(-0.02,-0.02) | -0.05(-0.05,-0.04) | 191 |
| Malaysia                              | 508.51(476.69-542.57) | 22  | 502.59(471.29-536.34) | 24  | -0.04(-0.04,-0.04) | -0.06(-0.06,-0.06) | -0.02(-0.03,-0.02) | -0.04(-0.04,-0.04) | 187 |
| Maldives                              | 505.69(473.81-539.82) | 25  | 475.36(446.00-506.79) | 47  | 0.04(0.03,0.05)    | -0.17(-0.23,-0.10) | -0.51(-0.54,-0.48) | -0.22(-0.24,-0.20) | 202 |
| Myanmar                               | 511.12(479.00-545.09) | 19  | 514.72(482.33-548.91) | 15  | 0.02(0.02,0.03)    | 0.03(0.03,0.03)    | 0.02(0.02,0.02)    | 0.02(0.02,0.03)    | 15  |
| Philippines                           | 515.38(493.87-535.59) | 16  | 512.85(491.60-532.99) | 16  | -0.02(-0.02,-0.01) | -0.02(-0.02,-0.02) | -0.02(-0.02,-0.01) | -0.02(-0.02,-0.02) | 171 |
| Sri Lanka                             | 469.65(438.46-500.66) | 50  | 470.57(437.88-502.92) | 50  | 0.04(0.04,0.04)    | -0.02(-0.03,-0.01) | -0.01(-0.01,-0.01) | 0.01(0.00,0.01)    | 25  |
| Thailand                              | 510.66(478.64-544.59) | 20  | 510.01(477.94-543.84) | 18  | 0.00(0.00,0.01)    | -0.03(-0.05,-0.02) | 0.00(-0.01,0.02)   | -0.01(-0.02,0.01)  | 127 |
| Timor-Leste                           | 504.12(472.49-537.71) | 27  | 508.70(476.81-542.68) | 19  | 0.03(0.03,0.04)    | 0.01(0.01,0.02)    | 0.05(0.05,0.06)    | 0.03(0.03,0.04)    | 7   |
| Viet Nam                              | 516.15(483.62-550.33) | 15  | 508.25(476.47-541.93) | 22  | -0.09(-0.09,-0.09) | -0.04(-0.04,-0.04) | -0.03(-0.03,-0.03) | -0.05(-0.05,-0.05) | 192 |
| Fiji                                  | 486.76(453.33-519.44) | 34  | 485.73(452.41-518.34) | 36  | -0.03(-0.03,-0.02) | 0.00(0.00,0.00)    | 0.01(0.01,0.01)    | -0.01(-0.01,-0.01) | 128 |
| Kiribati                              | 490.92(457.28-523.74) | 31  | 492.08(458.42-525.02) | 29  | 0.02(0.02,0.02)    | -0.02(-0.02,-0.02) | 0.03(0.02,0.03)    | 0.01(0.01,0.01)    | 26  |
| Marshall Islands                      | 485.21(452.04-517.78) | 38  | 484.86(451.44-517.47) | 39  | 0.00(0.00,0.00)    | -0.02(-0.02,-0.01) | 0.01(0.01,0.01)    | 0.00(0.00,0.00)    | 44  |
| Micronesia (Federated States of)      | 485.60(452.40-518.40) | 37  | 485.24(451.92-517.91) | 38  | 0.04(0.04,0.04)    | -0.03(-0.03,-0.03) | -0.02(-0.02,-0.02) | 0.00(0.00,0.00)    | 45  |
| Papua New Guinea                      | 483.62(450.33-516.22) | 43  | 484.41(451.09-517.00) | 40  | 0.03(0.02,0.03)    | -0.01(-0.01,0.00)  | 0.00(0.00,0.00)    | 0.01(0.00,0.01)    | 27  |
| Samoa                                 | 481.18(447.94-514.02) | 46  | 484.39(451.12-516.88) | 41  | 0.01(0.01,0.02)    | 0.02(0.02,0.02)    | 0.03(0.03,0.03)    | 0.02(0.02,0.02)    | 16  |
| Solomon Islands                       | 484.55(451.16-517.15) | 40  | 487.26(453.81-519.81) | 35  | 0.01(0.00,0.01)    | 0.03(0.03,0.03)    | 0.02(0.02,0.02)    | 0.02(0.02,0.02)    | 17  |
| Tonga                                 | 489.49(455.74-522.30) | 32  | 490.68(456.98-523.45) | 30  | -0.05(-0.05,-0.05) | 0.02(0.02,0.02)    | 0.06(0.05,0.06)    | 0.01(0.01,0.01)    | 28  |
| Vanuatu                               | 486.38(452.92-518.89) | 35  | 488.69(455.11-521.34) | 32  | 0.01(0.00,0.01)    | 0.02(0.02,0.02)    | 0.02(0.02,0.02)    | 0.02(0.02,0.02)    | 18  |
| Armenia                               | 612.86(542.09-693.46) | 9   | 607.10(536.53-687.14) | 7   | -0.02(-0.02,-0.02) | -0.05(-0.06,-0.05) | -0.02(-0.02,-0.02) | -0.03(-0.03,-0.03) | 182 |
| Azerbaijan                            | 613.39(542.52-693.94) | 8   | 605.13(534.71-685.15) | 8   | -0.03(-0.03,-0.02) | -0.08(-0.08,-0.08) | -0.03(-0.03,-0.03) | -0.05(-0.05,-0.05) | 193 |
| Georgia                               | 614.79(543.93-695.32) | 3   | 602.47(527.48-684.79) | 9   | -0.22(-0.32,-0.11) | -0.14(-0.16,-0.13) | 0.17(0.05,0.30)    | -0.07(-0.12,-0.02) | 197 |
| Kazakhstan                            | 615.00(543.89-695.52) | 2   | 613.08(542.28-693.54) | 2   | -0.01(-0.01,0.00)  | -0.01(-0.01,-0.01) | -0.02(-0.02,-0.01) | -0.01(-0.01,-0.01) | 129 |
| Kyrgyzstan                            | 615.15(544.04-695.87) | 1   | 612.27(541.45-692.76) | 3   | -0.03(-0.03,-0.02) | 0.00(-0.01,0.00)   | -0.02(-0.02,-0.02) | -0.02(-0.02,-0.02) | 172 |
| Mongolia                              | 613.60(542.59-694.56) | 7   | 613.48(542.50-694.09) | 1   | 0.01(0.01,0.01)    | -0.01(-0.01,0.00)  | 0.00(0.00,0.00)    | 0.00(0.00,0.00)    | 46  |
| Tajikistan                            | 613.74(542.79-694.38) | 6   | 610.40(539.53-691.06) | 5   | -0.02(-0.02,-0.02) | -0.03(-0.03,-0.03) | -0.01(-0.01,0.00)  | -0.02(-0.02,-0.02) | 173 |
| Turkmenistan                          | 614.67(543.68-695.49) | 4   | 608.33(537.26-688.60) | 6   | -0.05(-0.05,-0.05) | -0.03(-0.03,-0.03) | -0.03(-0.03,-0.02) | -0.04(-0.04,-0.04) | 188 |
| Uzbekistan                            | 614.50(543.49-695.30) | 5   | 610.76(540.04-691.21) | 4   | -0.02(-0.02,-0.02) | -0.02(-0.02,-0.02) | -0.03(-0.03,-0.03) | -0.02(-0.02,-0.02) | 174 |
| Albania                               | 202.60(187.79-218.14) | 136 | 203.10(188.37-218.66) | 132 | 0.06(0.05,0.07)    | -0.01(-0.02,-0.01) | -0.03(-0.03,-0.03) | 0.01(0.00,0.01)    | 29  |

|                        |                       |     |                       |     |                    |                    |                    |                    |     |
|------------------------|-----------------------|-----|-----------------------|-----|--------------------|--------------------|--------------------|--------------------|-----|
| Bosnia and Herzegovina | 203.63(188.86-219.16) | 134 | 203.74(188.98-219.29) | 126 | 0.01(0.00,0.03)    | -0.01(-0.01,0.00)  | 0.01(0.01,0.01)    | 0.00(0.00,0.01)    | 47  |
| Bulgaria               | 203.92(189.20-219.47) | 130 | 203.33(188.54-218.87) | 130 | 0.00(-0.01,0.00)   | -0.01(-0.01,-0.01) | -0.01(-0.02,-0.01) | -0.01(-0.01,-0.01) | 130 |
| Croatia                | 203.84(189.01-219.37) | 132 | 203.54(188.77-219.09) | 127 | 0.00(0.00,0.01)    | -0.01(-0.01,-0.01) | -0.01(-0.01,-0.01) | -0.01(-0.01,0.00)  | 131 |
| Czechia                | 203.92(189.16-219.46) | 129 | 203.37(188.61-218.91) | 129 | -0.01(-0.01,-0.01) | -0.01(-0.01,-0.01) | -0.01(-0.01,-0.01) | -0.01(-0.01,-0.01) | 132 |
| Hungary                | 251.14(229.60-276.35) | 109 | 250.51(228.99-275.71) | 109 | 0.11(0.11,0.12)    | -0.01(-0.01,-0.01) | -0.13(-0.14,-0.12) | -0.01(-0.01,-0.01) | 133 |
| North Macedonia        | 203.59(188.83-219.16) | 135 | 202.95(188.14-218.49) | 135 | 0.00(-0.02,0.01)   | -0.02(-0.02,-0.01) | -0.02(-0.02,-0.01) | -0.01(-0.02,-0.01) | 134 |
| Montenegro             | 203.69(188.91-219.23) | 133 | 203.23(188.41-218.79) | 131 | 0.00(0.00,0.00)    | -0.01(-0.01,-0.01) | -0.01(-0.01,-0.01) | -0.01(-0.01,-0.01) | 135 |
| Poland                 | 206.13(193.87-218.51) | 123 | 188.66(179.61-198.37) | 155 | 0.00(-0.01,0.00)   | -0.97(-0.98,-0.96) | -0.01(-0.02,-0.01) | -0.31(-0.31,-0.30) | 204 |
| Romania                | 151.56(140.46-161.99) | 198 | 152.70(141.65-163.28) | 197 | 0.00(0.00,0.00)    | 0.09(0.09,0.10)    | 0.00(-0.01,0.00)   | 0.03(0.02,0.03)    | 8   |
| Serbia                 | 205.47(190.60-221.22) | 127 | 202.99(188.28-218.55) | 134 | -0.02(-0.04,0.00)  | -0.06(-0.06,-0.05) | -0.04(-0.05,-0.04) | -0.04(-0.05,-0.04) | 189 |
| Slovakia               | 204.20(189.47-219.75) | 128 | 203.53(188.76-219.08) | 128 | -0.01(-0.01,-0.01) | -0.01(-0.02,-0.01) | -0.01(-0.01,-0.01) | -0.01(-0.01,-0.01) | 136 |
| Slovenia               | 203.87(189.05-219.41) | 131 | 203.02(188.23-218.57) | 133 | -0.02(-0.02,-0.01) | -0.02(-0.02,-0.02) | -0.01(-0.01,-0.01) | -0.01(-0.02,-0.01) | 137 |
| Belarus                | 205.62(188.83-223.35) | 125 | 204.70(187.93-222.44) | 124 | -0.03(-0.03,-0.03) | 0.00(0.00,0.00)    | -0.02(-0.02,-0.02) | -0.02(-0.02,-0.01) | 175 |
| Estonia                | 309.87(279.65-341.89) | 80  | 308.14(277.96-340.12) | 79  | 0.00(0.00,0.01)    | -0.02(-0.03,-0.01) | -0.04(-0.04,-0.04) | -0.02(-0.03,-0.02) | 176 |
| Latvia                 | 145.26(132.51-158.88) | 199 | 144.60(132.73-158.76) | 199 | 0.00(-0.02,0.01)   | 0.00(-0.01,0.00)   | -0.04(-0.04,-0.03) | -0.02(-0.02,-0.01) | 177 |
| Lithuania              | 205.60(188.78-223.38) | 126 | 204.72(187.95-222.46) | 123 | -0.01(-0.01,-0.01) | -0.01(-0.01,-0.01) | -0.02(-0.03,-0.02) | -0.01(-0.02,-0.01) | 138 |
| Republic of Moldova    | 205.93(189.10-223.72) | 124 | 204.56(187.79-222.29) | 125 | -0.03(-0.03,-0.03) | -0.02(-0.02,-0.02) | -0.02(-0.02,-0.02) | -0.02(-0.02,-0.02) | 178 |
| Russian Federation     | 283.29(263.84-303.85) | 82  | 285.67(267.06-304.75) | 82  | 0.22(0.13,0.31)    | -0.11(-0.19,-0.03) | -0.02(-0.08,0.04)  | 0.03(-0.02,0.08)   | 9   |
| Ukraine                | 219.03(204.39-234.35) | 113 | 218.21(203.62-233.48) | 114 | -0.02(-0.02,-0.02) | 0.00(-0.01,0.00)   | -0.01(-0.02,-0.01) | -0.01(-0.01,-0.01) | 139 |
| Brunei Darussalam      | 470.37(434.29-508.23) | 49  | 471.57(435.38-509.53) | 48  | 0.12(0.11,0.12)    | -0.03(-0.04,-0.03) | -0.05(-0.05,-0.05) | 0.01(0.01,0.01)    | 30  |
| Japan                  | 584.46(548.76-622.92) | 10  | 582.49(545.52-618.63) | 10  | 0.11(0.10,0.13)    | -0.02(-0.03,-0.02) | -0.14(-0.16,-0.11) | -0.02(-0.02,-0.01) | 179 |
| Republic of Korea      | 473.22(436.19-513.63) | 48  | 475.65(437.09-517.90) | 46  | -0.11(-0.16,-0.06) | 0.00(-0.01,0.01)   | 0.15(0.11,0.19)    | 0.01(-0.01,0.03)   | 31  |
| Singapore              | 443.45(402.82-485.32) | 66  | 440.78(400.23-482.48) | 67  | -0.05(-0.11,0.00)  | -0.08(-0.19,0.03)  | 0.02(-0.02,0.05)   | -0.03(-0.07,0.01)  | 183 |
| Australia              | 346.00(316.85-377.99) | 76  | 345.27(316.71-375.89) | 76  | 0.06(0.05,0.07)    | 0.00(0.00,0.00)    | -0.07(-0.08,-0.07) | 0.00(-0.01,0.00)   | 48  |
| New Zealand            | 436.67(410.01-464.69) | 67  | 441.34(415.11-468.95) | 66  | 0.01(0.01,0.01)    | 0.11(0.10,0.12)    | 0.00(0.00,0.00)    | 0.04(0.04,0.04)    | 5   |
| Andorra                | 444.06(410.47-480.28) | 65  | 447.38(413.49-483.76) | 64  | 0.04(0.02,0.06)    | -0.01(-0.09,0.07)  | 0.04(-0.01,0.10)   | 0.03(-0.01,0.08)   | 10  |
| Austria                | 448.91(415.19-485.16) | 57  | 447.49(413.86-483.76) | 63  | 0.00(-0.01,0.00)   | 0.00(0.00,0.00)    | -0.03(-0.04,-0.02) | -0.01(-0.01,-0.01) | 140 |
| Belgium                | 448.39(414.69-484.68) | 62  | 448.54(414.85-484.89) | 57  | 0.01(0.01,0.01)    | 0.00(0.00,0.00)    | 0.00(0.00,0.00)    | 0.00(0.00,0.00)    | 49  |
| Cyprus                 | 433.70(392.83-478.90) | 69  | 433.42(391.83-477.86) | 69  | 0.00(-0.01,0.01)   | 0.00(-0.01,0.00)   | -0.01(-0.01,-0.01) | 0.00(0.00,0.00)    | 50  |
| Denmark                | 514.75(468.16-568.39) | 18  | 518.13(469.83-570.80) | 14  | 0.08(0.07,0.08)    | 0.01(0.00,0.01)    | -0.01(-0.01,-0.01) | 0.02(0.02,0.03)    | 19  |
| Finland                | 449.00(415.22-485.26) | 56  | 448.00(414.22-484.30) | 60  | -0.01(-0.01,0.00)  | -0.01(-0.01,-0.01) | -0.01(-0.01,-0.01) | -0.01(-0.01,-0.01) | 141 |
| France                 | 550.81(505.10-603.10) | 12  | 550.98(505.28-603.33) | 12  | 0.08(0.08,0.08)    | 0.00(0.00,0.00)    | -0.08(-0.09,-0.07) | 0.00(0.00,0.00)    | 51  |
| Germany                | 436.35(405.29-468.71) | 68  | 438.81(404.55-475.13) | 68  | -0.02(-0.08,0.04)  | -0.22(-0.39,-0.05) | 0.37(0.24,0.49)    | 0.04(-0.03,0.12)   | 6   |
| Greece                 | 383.51(346.56-423.21) | 75  | 386.17(348.70-428.00) | 75  | -0.05(-0.06,-0.04) | 0.10(0.09,0.10)    | 0.02(0.02,0.02)    | 0.03(0.02,0.03)    | 11  |
| Iceland                | 492.88(450.41-542.49) | 30  | 490.56(446.14-541.64) | 31  | 0.04(0.02,0.05)    | -0.04(-0.05,-0.03) | -0.04(-0.05,-0.02) | -0.01(-0.02,-0.01) | 142 |
| Ireland                | 448.44(414.80-484.73) | 61  | 449.04(415.42-485.43) | 56  | 0.00(0.00,0.00)    | 0.01(0.01,0.01)    | 0.01(0.00,0.01)    | 0.00(0.00,0.01)    | 52  |
| Israel                 | 449.41(415.73-485.75) | 55  | 448.50(414.85-484.83) | 58  | 0.00(-0.01,0.00)   | -0.01(-0.01,-0.01) | -0.01(-0.01,-0.01) | -0.01(-0.01,-0.01) | 143 |
| Italy                  | 508.61(477.19-541.25) | 21  | 507.70(476.31-540.37) | 23  | 0.02(0.01,0.02)    | -0.01(-0.01,-0.01) | -0.03(-0.03,-0.02) | -0.01(-0.01,0.00)  | 144 |

|                                  |                       |     |                       |     |                    |                    |                    |                    |     |
|----------------------------------|-----------------------|-----|-----------------------|-----|--------------------|--------------------|--------------------|--------------------|-----|
| Luxembourg                       | 448.69(414.96-484.90) | 59  | 447.59(413.81-483.83) | 61  | -0.01(-0.01,-0.01) | -0.01(-0.02,0.00)  | -0.01(-0.02,-0.01) | -0.01(-0.01,0.00)  | 145 |
| Malta                            | 448.76(415.06-485.04) | 58  | 446.81(413.08-483.10) | 65  | -0.02(-0.02,-0.02) | -0.02(-0.02,-0.01) | -0.01(-0.01,-0.01) | -0.02(-0.02,-0.01) | 180 |
| Netherlands                      | 448.56(414.82-484.85) | 60  | 448.28(414.53-484.63) | 59  | 0.00(-0.01,0.00)   | 0.00(0.00,0.00)    | -0.01(-0.01,0.00)  | 0.00(0.00,0.00)    | 53  |
| Norway                           | 496.83(467.38-528.21) | 28  | 496.97(466.25-529.40) | 27  | 0.19(0.18,0.20)    | 0.05(0.03,0.06)    | -0.23(-0.26,-0.21) | 0.00(-0.01,0.01)   | 54  |
| Portugal                         | 449.85(416.10-486.22) | 53  | 449.82(416.11-486.23) | 55  | -0.01(-0.01,-0.01) | 0.00(0.00,0.01)    | 0.00(0.00,0.01)    | 0.00(0.00,0.00)    | 55  |
| Spain                            | 424.19(387.12-467.10) | 70  | 423.70(386.64-466.65) | 70  | 0.03(0.00,0.06)    | 0.00(-0.01,0.00)   | -0.04(-0.06,-0.01) | 0.00(-0.01,0.01)   | 56  |
| Sweden                           | 461.71(434.23-489.60) | 52  | 460.84(433.49-488.76) | 51  | 0.00(0.00,0.00)    | -0.01(-0.01,-0.01) | -0.01(-0.01,-0.01) | -0.01(-0.01,-0.01) | 146 |
| Switzerland                      | 448.20(414.46-484.47) | 63  | 447.49(413.80-483.78) | 62  | 0.01(0.00,0.01)    | -0.01(-0.01,-0.01) | -0.02(-0.02,-0.02) | -0.01(-0.01,0.00)  | 147 |
| United Kingdom                   | 505.00(475.70-537.06) | 26  | 497.67(467.37-529.30) | 25  | -0.30(-0.37,-0.23) | -0.06(-0.08,-0.04) | 0.23(0.12,0.34)    | -0.06(-0.10,-0.02) | 194 |
| Argentina                        | 402.55(371.55-436.24) | 72  | 401.98(371.10-435.57) | 72  | 0.00(-0.01,0.00)   | -0.01(-0.01,0.00)  | 0.00(-0.01,0.00)   | 0.00(-0.01,0.00)   | 57  |
| Chile                            | 402.29(371.48-435.86) | 73  | 401.27(370.41-434.75) | 74  | -0.02(-0.02,-0.02) | 0.00(0.00,0.00)    | -0.01(-0.01,-0.01) | -0.01(-0.01,-0.01) | 148 |
| Uruguay                          | 402.17(371.27-435.79) | 74  | 401.85(371.14-435.34) | 73  | 0.00(0.00,0.00)    | -0.01(-0.01,0.00)  | 0.00(0.00,0.00)    | 0.00(0.00,0.00)    | 58  |
| Canada                           | 244.82(231.25-258.68) | 111 | 244.94(231.38-258.76) | 111 | 0.01(0.00,0.01)    | 0.00(0.00,0.00)    | 0.00(0.00,0.00)    | 0.00(0.00,0.00)    | 59  |
| United States of America         | 319.96(302.88-337.36) | 78  | 300.42(284.01-317.26) | 80  | 0.94(0.78,1.11)    | -1.72(-1.81,-1.64) | 0.06(-0.03,0.14)   | -0.22(-0.29,-0.15) | 203 |
| Antigua and Barbuda              | 274.48(251.96-296.42) | 91  | 274.01(251.53-295.91) | 94  | 0.01(0.01,0.01)    | -0.02(-0.02,-0.02) | -0.01(-0.01,-0.01) | -0.01(-0.01,-0.01) | 149 |
| Bahamas                          | 274.32(251.80-296.25) | 94  | 274.42(251.91-296.33) | 89  | 0.00(0.00,0.00)    | 0.01(0.01,0.01)    | 0.00(0.00,0.00)    | 0.00(0.00,0.00)    | 60  |
| Barbados                         | 274.34(251.79-296.27) | 93  | 273.93(251.44-295.83) | 96  | -0.01(-0.01,0.00)  | -0.01(-0.01,-0.01) | 0.00(0.00,0.00)    | -0.01(-0.01,0.00)  | 150 |
| Belize                           | 273.75(251.38-295.62) | 105 | 273.89(251.47-295.75) | 99  | 0.00(0.00,0.00)    | 0.00(0.00,0.00)    | 0.00(0.00,0.00)    | 0.00(0.00,0.00)    | 61  |
| Cuba                             | 273.58(251.18-295.45) | 107 | 273.47(251.05-295.35) | 106 | 0.00(0.00,0.00)    | 0.00(0.00,0.00)    | 0.00(0.00,0.00)    | 0.00(0.00,0.00)    | 62  |
| Dominica                         | 273.73(251.24-295.62) | 106 | 273.55(251.20-295.46) | 105 | 0.01(0.01,0.01)    | -0.01(-0.01,-0.01) | 0.00(0.00,0.00)    | 0.00(0.00,0.00)    | 63  |
| Dominican Republic               | 274.25(251.80-296.12) | 97  | 273.77(251.35-295.63) | 102 | -0.01(-0.01,-0.01) | -0.01(-0.01,-0.01) | 0.00(0.00,0.00)    | -0.01(-0.01,-0.01) | 151 |
| Grenada                          | 274.25(251.71-296.18) | 98  | 273.46(251.08-295.34) | 107 | 0.02(0.01,0.02)    | -0.03(-0.03,-0.03) | -0.02(-0.02,-0.02) | -0.01(-0.01,-0.01) | 152 |
| Guyana                           | 274.31(251.84-296.20) | 95  | 274.05(251.60-295.96) | 93  | -0.01(-0.01,-0.01) | 0.00(0.00,0.00)    | 0.00(0.00,0.00)    | 0.00(0.00,0.00)    | 64  |
| Haiti                            | 274.69(252.21-296.62) | 89  | 274.40(251.89-296.31) | 90  | -0.01(-0.01,-0.01) | 0.00(0.00,0.00)    | 0.00(0.00,0.00)    | 0.00(0.00,0.00)    | 65  |
| Jamaica                          | 274.22(251.76-296.14) | 99  | 273.90(251.47-295.78) | 98  | -0.01(-0.01,-0.01) | 0.00(0.00,0.00)    | 0.00(0.00,0.00)    | 0.00(0.00,0.00)    | 66  |
| Saint Lucia                      | 274.53(252.00-296.46) | 90  | 273.85(251.42-295.75) | 101 | -0.01(-0.01,-0.01) | -0.01(-0.01,-0.01) | -0.01(-0.01,0.00)  | -0.01(-0.01,-0.01) | 153 |
| Saint Vincent and the Grenadines | 274.10(251.62-296.01) | 102 | 273.63(251.29-295.52) | 104 | -0.01(-0.01,-0.01) | -0.01(-0.01,-0.01) | 0.00(0.00,0.00)    | -0.01(-0.01,-0.01) | 154 |
| Suriname                         | 274.16(251.68-296.07) | 101 | 273.89(251.44-295.81) | 100 | 0.00(0.00,0.00)    | -0.01(-0.01,-0.01) | 0.00(0.00,0.00)    | 0.00(0.00,0.00)    | 67  |
| Trinidad and Tobago              | 274.00(251.57-295.91) | 104 | 273.72(251.33-295.61) | 103 | 0.00(-0.01,0.00)   | 0.00(0.00,0.00)    | 0.00(0.00,0.00)    | 0.00(0.00,0.00)    | 68  |
| Bolivia (Plurinational State of) | 263.65(247.70-280.37) | 108 | 263.33(247.36-280.05) | 108 | -0.01(-0.01,-0.01) | 0.00(0.00,0.00)    | 0.00(0.00,0.00)    | 0.00(0.00,0.00)    | 69  |
| Ecuador                          | 278.87(260.90-297.89) | 83  | 278.96(261.28-297.37) | 83  | 0.01(0.01,0.02)    | 0.00(0.00,0.00)    | -0.01(-0.01,-0.01) | 0.00(0.00,0.00)    | 70  |
| Peru                             | 247.70(232.49-263.53) | 110 | 247.34(232.04-263.22) | 110 | -0.30(-0.31,-0.29) | -0.02(-0.02,-0.02) | 0.34(0.31,0.37)    | 0.00(-0.01,0.01)   | 71  |
| Colombia                         | 215.71(199.74-232.69) | 118 | 215.60(199.71-232.60) | 121 | 0.00(0.00,0.00)    | 0.00(0.00,0.00)    | 0.00(0.00,0.00)    | 0.00(0.00,0.00)    | 72  |
| Costa Rica                       | 215.49(199.58-232.47) | 121 | 215.76(199.83-232.74) | 118 | 0.00(0.00,0.00)    | 0.01(0.01,0.01)    | 0.00(0.00,0.00)    | 0.00(0.00,0.00)    | 73  |
| El Salvador                      | 215.84(199.87-232.83) | 116 | 215.96(200.07-232.89) | 115 | 0.01(0.01,0.01)    | 0.00(0.00,0.00)    | 0.00(0.00,0.00)    | 0.00(0.00,0.00)    | 74  |
| Guatemala                        | 215.73(199.75-232.70) | 117 | 215.86(199.95-232.84) | 116 | 0.00(0.00,0.00)    | 0.00(0.00,0.00)    | 0.00(0.00,0.00)    | 0.00(0.00,0.00)    | 75  |
| Honduras                         | 215.66(199.70-232.65) | 119 | 215.77(199.83-232.74) | 117 | 0.00(0.00,0.00)    | 0.00(0.00,0.00)    | 0.00(0.00,0.00)    | 0.00(0.00,0.00)    | 76  |
| Mexico                           | 218.68(206.22-230.54) | 114 | 218.53(206.10-230.37) | 113 | -0.05(-0.05,-0.04) | -0.01(-0.01,-0.01) | 0.04(0.04,0.04)    | 0.00(-0.01,0.00)   | 77  |

|                                    |                       |     |                       |     |                    |                    |                    |                    |     |
|------------------------------------|-----------------------|-----|-----------------------|-----|--------------------|--------------------|--------------------|--------------------|-----|
| Nicaragua                          | 215.91(199.92-232.89) | 115 | 215.67(199.77-232.68) | 119 | -0.01(-0.01,-0.01) | -0.01(-0.01,-0.01) | 0.00(0.00,0.00)    | 0.00(0.00,0.00)    | 78  |
| Panama                             | 215.40(199.49-232.38) | 122 | 215.39(199.52-232.38) | 122 | 0.00(0.00,0.00)    | 0.00(0.00,0.00)    | 0.00(0.00,0.00)    | 0.00(0.00,0.00)    | 79  |
| Venezuela (Bolivarian Republic of) | 215.65(199.72-232.64) | 120 | 215.62(199.69-232.63) | 120 | 0.00(-0.01,0.00)   | -0.01(-0.01,0.00)  | 0.01(0.01,0.01)    | 0.00(0.00,0.00)    | 80  |
| Brazil                             | 320.64(303.58-339.20) | 77  | 320.08(303.60-337.42) | 77  | -0.05(-0.06,-0.03) | 0.00(0.00,0.01)    | 0.02(0.02,0.03)    | -0.01(-0.01,0.00)  | 155 |
| Paraguay                           | 319.63(295.01-344.69) | 79  | 319.32(294.73-344.33) | 78  | 0.00(0.00,0.00)    | 0.00(0.00,0.00)    | 0.00(0.00,0.00)    | 0.00(0.00,0.00)    | 81  |
| Algeria                            | 193.67(180.54-207.61) | 144 | 193.52(180.36-207.49) | 144 | 0.00(0.00,0.00)    | 0.00(0.00,0.00)    | 0.00(0.00,0.00)    | 0.00(0.00,0.00)    | 82  |
| Bahrain                            | 190.90(177.94-204.51) | 153 | 190.71(177.66-204.38) | 153 | 0.02(0.01,0.02)    | -0.07(-0.08,-0.07) | 0.04(0.03,0.05)    | 0.00(-0.01,0.00)   | 83  |
| Egypt                              | 140.10(128.98-151.54) | 201 | 135.67(125.32-146.28) | 203 | -0.21(-0.21,-0.20) | -0.08(-0.08,-0.08) | -0.01(-0.01,-0.01) | -0.11(-0.11,-0.11) | 200 |
| Iran (Islamic Republic of)         | 197.25(186.63-208.22) | 137 | 198.13(187.69-209.04) | 136 | 0.00(-0.01,0.00)   | 0.05(0.04,0.07)    | -0.01(-0.01,0.00)  | 0.01(0.01,0.02)    | 32  |
| Iraq                               | 193.50(177.71-209.75) | 148 | 193.40(177.62-209.66) | 146 | -0.17(-0.19,-0.16) | 0.00(0.00,0.00)    | 0.18(0.15,0.22)    | 0.00(-0.01,0.01)   | 84  |
| Jordan                             | 192.83(179.75-206.80) | 150 | 192.38(179.31-206.19) | 150 | 0.02(0.02,0.02)    | -0.01(-0.01,-0.01) | -0.03(-0.03,-0.03) | -0.01(-0.01,-0.01) | 156 |
| Kuwait                             | 190.87(177.85-204.55) | 154 | 192.51(179.38-206.33) | 149 | -0.04(-0.05,-0.03) | 0.05(0.04,0.05)    | 0.08(0.08,0.09)    | 0.03(0.03,0.04)    | 12  |
| Lebanon                            | 193.74(180.47-207.83) | 142 | 193.80(180.61-207.83) | 138 | -0.01(-0.01,0.00)  | 0.02(0.01,0.02)    | -0.01(-0.01,-0.01) | 0.00(0.00,0.00)    | 85  |
| Libya                              | 192.75(179.68-206.59) | 151 | 193.17(180.05-207.03) | 148 | 0.03(0.03,0.03)    | -0.01(-0.01,-0.01) | 0.01(0.00,0.01)    | 0.01(0.01,0.01)    | 33  |
| Morocco                            | 194.07(180.87-208.06) | 139 | 193.70(180.54-207.68) | 140 | 0.01(0.01,0.01)    | -0.01(-0.01,-0.01) | -0.02(-0.02,-0.01) | -0.01(-0.01,-0.01) | 157 |
| Palestine                          | 193.96(180.78-207.94) | 140 | 193.50(180.39-207.46) | 145 | -0.02(-0.02,-0.02) | 0.00(0.00,0.00)    | -0.01(-0.01,-0.01) | -0.01(-0.01,-0.01) | 158 |
| Oman                               | 190.06(177.31-203.60) | 155 | 189.26(176.58-202.94) | 154 | 0.06(0.05,0.07)    | 0.00(-0.04,0.04)   | -0.08(-0.12,-0.03) | -0.01(-0.04,0.01)  | 159 |
| Qatar                              | 187.70(174.93-201.19) | 157 | 185.91(172.89-199.35) | 157 | 0.05(0.04,0.06)    | -0.13(-0.16,-0.09) | -0.01(-0.02,0.00)  | -0.03(-0.04,-0.02) | 184 |
| Saudi Arabia                       | 191.02(178.07-204.70) | 152 | 190.78(177.84-204.42) | 152 | 0.02(0.02,0.03)    | -0.02(-0.02,-0.02) | -0.02(-0.02,-0.01) | 0.00(-0.01,0.00)   | 86  |
| Syrian Arab Republic               | 193.37(180.23-207.28) | 149 | 194.73(181.37-208.77) | 137 | -0.01(-0.01,-0.01) | -0.01(-0.01,-0.01) | 0.10(0.08,0.11)    | 0.02(0.02,0.03)    | 20  |
| Tunisia                            | 193.63(180.45-207.59) | 146 | 193.73(180.51-207.68) | 139 | 0.00(0.00,0.00)    | 0.00(0.00,0.00)    | 0.00(0.00,0.00)    | 0.00(0.00,0.00)    | 87  |
| Turkey                             | 296.59(274.07-321.34) | 81  | 297.01(274.88-320.57) | 81  | 0.12(0.07,0.17)    | 0.00(-0.01,0.01)   | -0.12(-0.24,-0.01) | 0.00(-0.04,0.04)   | 88  |
| United Arab Emirates               | 188.25(175.51-201.90) | 156 | 188.10(175.35-202.07) | 156 | -0.03(-0.04,-0.03) | -0.09(-0.10,-0.08) | 0.10(0.10,0.11)    | 0.00(-0.01,0.00)   | 89  |
| Yemen                              | 193.73(180.54-207.68) | 143 | 193.70(180.54-207.63) | 141 | -0.01(-0.01,-0.01) | 0.00(0.00,0.00)    | 0.00(0.00,0.00)    | 0.00(0.00,0.00)    | 90  |
| Afghanistan                        | 194.60(181.21-208.67) | 138 | 193.35(180.25-207.23) | 147 | -0.04(-0.05,-0.04) | -0.02(-0.03,0.00)  | -0.01(-0.01,-0.01) | -0.02(-0.03,-0.02) | 181 |
| Bangladesh                         | 276.02(252.49-304.69) | 87  | 276.77(253.20-305.57) | 87  | 0.00(0.00,0.00)    | 0.01(0.01,0.01)    | 0.01(0.01,0.01)    | 0.01(0.01,0.01)    | 34  |
| Bhutan                             | 275.97(252.17-304.54) | 88  | 276.01(252.37-304.78) | 88  | -0.01(-0.01,-0.01) | 0.00(0.00,0.00)    | 0.01(0.01,0.01)    | 0.00(0.00,0.00)    | 91  |
| India                              | 277.62(261.03-295.57) | 84  | 277.90(261.29-295.88) | 84  | 0.16(0.15,0.16)    | 0.00(0.00,0.00)    | -0.16(-0.17,-0.14) | 0.00(0.00,0.00)    | 92  |
| Nepal                              | 276.61(252.98-305.31) | 86  | 277.35(253.73-306.12) | 86  | 0.00(0.00,0.00)    | 0.01(0.01,0.02)    | 0.01(0.01,0.01)    | 0.01(0.01,0.01)    | 35  |
| Pakistan                           | 277.24(260.68-295.20) | 85  | 277.69(261.12-295.70) | 85  | 0.01(0.01,0.01)    | 0.01(0.01,0.01)    | 0.00(0.00,0.00)    | 0.01(0.01,0.01)    | 36  |
| Angola                             | 159.26(146.57-173.73) | 187 | 159.69(146.96-174.22) | 179 | 0.02(0.02,0.02)    | 0.01(0.01,0.01)    | 0.00(0.00,0.00)    | 0.01(0.01,0.01)    | 37  |
| Central African Republic           | 159.54(146.83-174.03) | 184 | 159.61(146.89-174.13) | 181 | 0.00(0.00,0.00)    | 0.00(0.00,0.00)    | 0.01(0.00,0.01)    | 0.00(0.00,0.00)    | 93  |
| Congo                              | 159.69(146.96-174.20) | 179 | 159.45(146.75-173.96) | 184 | 0.00(0.00,0.00)    | -0.01(-0.01,-0.01) | -0.01(-0.01,0.00)  | -0.01(-0.01,-0.01) | 160 |
| Democratic Republic of the Congo   | 159.51(146.80-173.97) | 186 | 159.40(146.68-173.90) | 186 | 0.00(0.00,0.00)    | 0.00(0.00,0.00)    | 0.00(0.00,0.00)    | 0.00(0.00,0.00)    | 94  |
| Equatorial Guinea                  | 159.63(146.91-174.21) | 180 | 158.46(145.75-172.91) | 187 | -0.02(-0.02,-0.02) | -0.04(-0.04,-0.04) | -0.02(-0.02,-0.01) | -0.03(-0.03,-0.02) | 185 |
| Gabon                              | 159.53(146.79-174.04) | 185 | 159.68(146.96-174.28) | 180 | 0.01(0.01,0.01)    | 0.00(0.00,0.00)    | 0.00(0.00,0.00)    | 0.00(0.00,0.00)    | 95  |
| Burundi                            | 153.50(143.87-163.99) | 189 | 153.19(143.49-163.60) | 192 | 0.00(0.00,0.00)    | -0.01(-0.02,-0.01) | -0.01(-0.01,-0.01) | -0.01(-0.01,-0.01) | 161 |
| Comoros                            | 153.22(143.56-163.60) | 193 | 153.13(143.42-163.45) | 193 | 0.00(0.00,0.00)    | 0.00(0.00,0.00)    | 0.00(0.00,0.00)    | 0.00(0.00,0.00)    | 96  |

|                             |                       |     |                       |     |                    |                    |                    |                    |     |
|-----------------------------|-----------------------|-----|-----------------------|-----|--------------------|--------------------|--------------------|--------------------|-----|
| Djibouti                    | 152.32(142.71-162.61) | 197 | 152.23(142.61-162.47) | 198 | -0.01(-0.01,0.00)  | -0.01(-0.01,-0.01) | 0.01(0.01,0.01)    | 0.00(0.00,0.00)    | 97  |
| Eritrea                     | 153.28(143.61-163.62) | 192 | 153.21(143.51-163.57) | 191 | 0.00(0.00,0.00)    | 0.00(0.00,0.00)    | 0.00(0.00,0.00)    | 0.00(0.00,0.00)    | 98  |
| Ethiopia                    | 140.33(132.76-148.08) | 200 | 143.15(135.72-151.40) | 200 | -0.09(-0.22,0.04)  | 0.00(-0.04,0.04)   | 0.35(0.26,0.43)    | 0.09(0.03,0.14)    | 2   |
| Kenya                       | 134.88(128.11-141.75) | 203 | 141.10(133.07-148.93) | 201 | 0.01(0.00,0.01)    | 0.49(0.49,0.50)    | 0.01(0.01,0.01)    | 0.16(0.16,0.16)    | 1   |
| Madagascar                  | 153.13(143.46-163.51) | 194 | 153.11(143.42-163.45) | 194 | 0.00(0.00,0.00)    | 0.00(0.00,0.00)    | 0.00(0.00,0.00)    | 0.00(0.00,0.00)    | 99  |
| Malawi                      | 153.40(143.74-163.85) | 190 | 153.49(143.84-163.96) | 189 | 0.00(0.00,0.01)    | 0.01(0.01,0.01)    | 0.00(0.00,0.00)    | 0.00(0.00,0.00)    | 100 |
| Mauritius                   | 508.28(476.32-542.01) | 23  | 508.54(476.73-542.41) | 20  | 0.02(0.02,0.03)    | -0.01(-0.02,0.00)  | -0.01(-0.01,-0.01) | 0.00(0.00,0.00)    | 101 |
| Mozambique                  | 153.56(143.92-164.01) | 188 | 153.57(143.92-164.03) | 188 | 0.00(0.00,0.00)    | 0.00(0.00,0.00)    | 0.00(0.00,0.00)    | 0.00(0.00,0.00)    | 102 |
| Rwanda                      | 112.10(104.29-120.53) | 204 | 112.07(104.24-120.48) | 204 | -0.27(-0.29,-0.25) | -0.02(-0.02,-0.01) | 0.26(0.25,0.28)    | -0.01(-0.01,0.00)  | 162 |
| Seychelles                  | 507.79(475.82-541.71) | 24  | 497.15(466.22-529.98) | 26  | 0.02(0.01,0.02)    | -0.17(-0.17,-0.16) | -0.05(-0.07,-0.04) | -0.07(-0.08,-0.07) | 198 |
| Somalia                     | 152.73(143.07-163.02) | 195 | 153.05(143.38-163.37) | 195 | 0.01(0.01,0.01)    | 0.01(0.01,0.01)    | 0.00(0.00,0.00)    | 0.01(0.01,0.01)    | 38  |
| United Republic of Tanzania | 193.89(181.80-207.72) | 141 | 192.08(180.71-204.44) | 151 | 0.01(0.00,0.01)    | -0.07(-0.08,-0.06) | 0.01(0.00,0.01)    | -0.03(-0.03,-0.03) | 186 |
| Uganda                      | 193.57(179.16-209.74) | 147 | 193.58(179.14-209.74) | 142 | 0.15(0.14,0.16)    | 0.00(0.00,0.00)    | -0.16(-0.18,-0.14) | 0.00(-0.01,0.00)   | 103 |
| Zambia                      | 153.29(143.65-163.76) | 191 | 153.28(143.59-163.67) | 190 | 0.00(0.00,0.00)    | 0.00(0.00,0.00)    | 0.00(0.00,0.00)    | 0.00(0.00,0.00)    | 104 |
| Botswana                    | 159.84(147.11-174.43) | 178 | 159.48(146.76-174.01) | 183 | -0.01(-0.01,-0.01) | -0.01(-0.01,-0.01) | -0.01(-0.01,-0.01) | -0.01(-0.01,-0.01) | 163 |
| Lesotho                     | 159.59(146.87-174.12) | 182 | 159.56(146.82-174.10) | 182 | 0.00(0.00,0.00)    | 0.00(0.00,0.00)    | -0.01(-0.01,-0.01) | 0.00(0.00,0.00)    | 105 |
| Namibia                     | 159.60(146.89-174.12) | 181 | 159.71(146.98-174.21) | 178 | 0.01(0.01,0.01)    | 0.00(0.00,0.00)    | 0.00(0.00,0.00)    | 0.00(0.00,0.00)    | 106 |
| South Africa                | 161.13(151.69-171.07) | 176 | 160.89(151.45-170.77) | 176 | 0.00(0.00,0.00)    | -0.01(-0.01,-0.01) | -0.01(-0.01,-0.01) | -0.01(-0.01,0.00)  | 164 |
| Eswatini                    | 159.92(147.19-174.52) | 177 | 159.44(146.72-174.04) | 185 | 0.00(0.00,0.00)    | -0.01(-0.01,-0.01) | -0.02(-0.02,-0.02) | -0.01(-0.01,-0.01) | 165 |
| Zimbabwe                    | 159.58(146.90-174.13) | 183 | 159.79(147.05-174.30) | 177 | 0.01(0.01,0.01)    | 0.01(0.01,0.01)    | 0.00(0.00,0.00)    | 0.00(0.00,0.01)    | 107 |
| Benin                       | 161.81(152.44-171.81) | 169 | 161.81(152.45-171.82) | 165 | 0.00(0.00,0.00)    | 0.00(0.00,0.00)    | 0.00(0.00,0.00)    | 0.00(0.00,0.00)    | 108 |
| Burkina Faso                | 162.01(152.61-172.03) | 162 | 161.92(152.55-171.92) | 162 | 0.00(-0.01,0.00)   | 0.00(0.00,0.00)    | 0.00(0.00,0.00)    | 0.00(0.00,0.00)    | 109 |
| Cameroon                    | 178.01(167.61-189.66) | 158 | 178.59(168.86-188.79) | 158 | 0.04(0.04,0.04)    | 0.00(0.00,0.00)    | 0.00(0.00,0.00)    | 0.01(0.01,0.01)    | 39  |
| Cabo Verde                  | 162.29(152.90-172.33) | 161 | 161.63(152.37-171.60) | 171 | -0.01(-0.01,-0.01) | -0.02(-0.02,-0.02) | -0.01(-0.02,-0.01) | -0.01(-0.01,-0.01) | 166 |
| Chad                        | 161.99(152.60-172.03) | 163 | 161.61(152.26-171.66) | 172 | -0.01(-0.01,-0.01) | -0.01(-0.01,-0.01) | -0.01(-0.01,-0.01) | -0.01(-0.01,-0.01) | 167 |
| Cote d'Ivoire               | 161.31(152.05-171.29) | 175 | 161.19(151.89-171.16) | 175 | 0.00(0.00,0.00)    | -0.01(-0.01,-0.01) | 0.00(0.00,0.00)    | 0.00(0.00,0.00)    | 110 |
| Gambia                      | 161.60(152.27-171.64) | 174 | 161.76(152.40-171.78) | 166 | 0.01(0.00,0.01)    | 0.01(0.01,0.01)    | 0.00(0.00,0.00)    | 0.00(0.00,0.00)    | 111 |
| Ghana                       | 137.40(129.97-145.56) | 202 | 137.55(130.12-145.70) | 202 | -0.67(-0.75,-0.58) | -0.03(-0.06,-0.01) | 0.66(0.51,0.80)    | 0.00(-0.06,0.05)   | 112 |
| Guinea                      | 161.78(152.40-171.80) | 170 | 161.84(152.46-171.88) | 163 | 0.01(0.01,0.01)    | 0.00(0.00,0.00)    | 0.00(-0.01,0.00)   | 0.00(0.00,0.00)    | 113 |
| Guinea-Bissau               | 161.98(152.59-172.01) | 164 | 161.93(152.54-171.93) | 161 | 0.00(0.00,0.00)    | 0.00(0.00,0.00)    | 0.00(0.00,0.00)    | 0.00(0.00,0.00)    | 114 |
| Liberia                     | 161.81(152.42-171.85) | 168 | 161.44(152.12-171.42) | 174 | -0.02(-0.02,-0.01) | 0.00(-0.02,0.01)   | 0.00(0.00,0.00)    | -0.01(-0.01,0.00)  | 168 |
| Mali                        | 169.79(158.37-181.94) | 159 | 169.38(158.28-181.56) | 159 | -0.01(-0.01,-0.01) | -0.02(-0.02,-0.01) | 0.00(0.00,0.00)    | -0.01(-0.01,-0.01) | 169 |
| Mauritania                  | 161.68(152.34-171.68) | 172 | 161.72(152.36-171.74) | 168 | 0.00(0.00,0.00)    | 0.00(0.00,0.00)    | 0.00(0.00,0.00)    | 0.00(0.00,0.00)    | 115 |
| Niger                       | 161.62(152.27-171.65) | 173 | 161.71(152.37-171.71) | 169 | -0.01(-0.01,-0.01) | 0.01(0.01,0.01)    | 0.00(0.00,0.00)    | 0.00(0.00,0.00)    | 116 |
| Nigeria                     | 162.70(154.09-171.93) | 160 | 162.92(154.44-171.98) | 160 | -0.03(-0.03,-0.03) | 0.02(0.02,0.02)    | 0.03(0.03,0.03)    | 0.00(0.00,0.01)    | 117 |
| Sao Tome and Principe       | 161.74(152.38-171.74) | 171 | 161.64(152.34-171.62) | 170 | 0.00(0.00,0.00)    | 0.00(0.00,0.00)    | -0.01(-0.01,-0.01) | 0.00(0.00,0.00)    | 118 |
| Senegal                     | 161.96(152.61-172.01) | 165 | 161.53(152.19-171.49) | 173 | -0.01(-0.01,-0.01) | -0.01(-0.01,-0.01) | 0.00(0.00,0.00)    | -0.01(-0.01,-0.01) | 170 |
| Sierra Leone                | 161.86(152.49-171.92) | 167 | 161.75(152.40-171.76) | 167 | 0.01(0.01,0.01)    | -0.01(-0.01,0.00)  | -0.01(-0.01,-0.01) | 0.00(0.00,0.00)    | 119 |

|                              |                       |     |                       |     |                    |                    |                    |                    |     |
|------------------------------|-----------------------|-----|-----------------------|-----|--------------------|--------------------|--------------------|--------------------|-----|
| Togo                         | 161.95(152.57-171.95) | 166 | 161.84(152.45-171.79) | 164 | -0.01(-0.01,-0.01) | 0.00(0.00,0.00)    | 0.00(0.00,0.00)    | 0.00(0.00,0.00)    | 120 |
| American Samoa               | 485.85(452.48-518.28) | 36  | 488.04(454.57-520.74) | 33  | -0.01(-0.01,-0.01) | 0.04(0.04,0.04)    | 0.02(0.02,0.02)    | 0.02(0.02,0.02)    | 21  |
| Bermuda                      | 274.28(251.78-296.22) | 96  | 274.11(251.67-296.00) | 92  | 0.01(0.00,0.01)    | -0.01(-0.01,-0.01) | 0.00(0.00,0.00)    | 0.00(0.00,0.00)    | 121 |
| Cook Islands                 | 483.79(450.55-516.41) | 42  | 494.60(460.37-527.80) | 28  | 0.04(0.03,0.05)    | 0.09(0.08,0.09)    | 0.10(0.09,0.11)    | 0.08(0.07,0.08)    | 3   |
| Greenland                    | 241.78(228.32-255.65) | 112 | 243.56(229.92-257.32) | 112 | 0.04(0.03,0.05)    | 0.02(0.01,0.04)    | 0.01(0.01,0.02)    | 0.03(0.02,0.03)    | 13  |
| Guam                         | 477.16(444.60-509.58) | 47  | 482.11(448.87-514.64) | 44  | 0.17(0.15,0.18)    | -0.02(-0.03,0.00)  | -0.06(-0.06,-0.05) | 0.03(0.03,0.04)    | 14  |
| Monaco                       | 447.99(414.38-484.25) | 64  | 450.31(416.33-486.91) | 54  | -0.03(-0.03,-0.02) | 0.04(0.03,0.04)    | 0.04(0.02,0.07)    | 0.02(0.01,0.03)    | 22  |
| Nauru                        | 484.94(451.47-517.16) | 39  | 487.95(454.40-520.67) | 34  | 0.01(0.00,0.01)    | 0.03(0.03,0.03)    | 0.03(0.02,0.03)    | 0.02(0.02,0.02)    | 23  |
| Niue                         | 484.46(451.07-517.13) | 41  | 485.67(452.46-518.12) | 37  | 0.00(0.00,0.01)    | -0.03(-0.03,-0.02) | 0.05(0.04,0.06)    | 0.01(0.00,0.01)    | 40  |
| Northern Mariana Islands     | 482.87(449.83-514.58) | 45  | 482.66(449.60-514.81) | 43  | 0.34(0.16,0.52)    | -0.34(-0.58,-0.09) | -0.12(-0.15,-0.09) | 0.00(-0.11,0.11)   | 122 |
| Palau                        | 483.43(450.20-516.14) | 44  | 470.61(438.50-501.80) | 49  | -0.16(-0.19,-0.13) | 0.12(0.10,0.13)    | -0.23(-0.25,-0.21) | -0.10(-0.11,-0.08) | 199 |
| Puerto Rico                  | 274.08(251.58-295.97) | 103 | 273.93(251.44-295.81) | 95  | 0.00(0.00,0.00)    | 0.00(0.00,0.00)    | 0.00(0.00,0.00)    | 0.00(0.00,0.00)    | 123 |
| Saint Kitts and Nevis        | 274.20(251.72-296.11) | 100 | 273.91(251.52-295.79) | 97  | 0.00(0.00,0.00)    | 0.00(0.00,0.00)    | 0.00(0.00,0.00)    | 0.00(0.00,0.00)    | 124 |
| San Marino                   | 449.47(415.61-485.78) | 54  | 450.67(416.97-487.20) | 53  | 0.02(0.02,0.02)    | 0.01(0.01,0.01)    | 0.00(0.00,0.00)    | 0.01(0.01,0.01)    | 41  |
| Tokelau                      | 489.08(455.22-521.99) | 33  | 484.15(450.94-516.55) | 42  | 0.05(0.02,0.07)    | -0.17(-0.26,-0.09) | -0.02(-0.06,0.01)  | -0.04(-0.07,0.00)  | 190 |
| Tuvalu                       | 496.46(462.35-529.86) | 29  | 480.93(448.01-513.58) | 45  | -0.12(-0.13,-0.12) | -0.13(-0.13,-0.13) | -0.07(-0.08,-0.07) | -0.11(-0.11,-0.11) | 201 |
| United States Virgin Islands | 274.39(251.91-296.33) | 92  | 274.20(251.69-296.11) | 91  | 0.00(0.00,0.00)    | -0.01(-0.01,-0.01) | 0.00(0.00,0.00)    | 0.00(0.00,0.00)    | 125 |
| South Sudan                  | 152.42(142.71-162.68) | 196 | 152.92(143.25-163.21) | 196 | 0.00(0.00,0.00)    | 0.01(0.01,0.01)    | 0.03(0.02,0.03)    | 0.01(0.01,0.01)    | 42  |
| Sudan                        | 193.64(180.39-207.58) | 145 | 193.58(180.30-207.63) | 143 | -0.01(-0.01,0.00)  | 0.00(0.00,0.00)    | 0.00(0.00,0.00)    | 0.00(0.00,0.00)    | 126 |

**Number of incident cases**

***Asthma***

|                                       |                                |     |                                |     |                    |                    |                    |                    |     |
|---------------------------------------|--------------------------------|-----|--------------------------------|-----|--------------------|--------------------|--------------------|--------------------|-----|
| China                                 | 4,490,559(3,363,512-6,071,201) | 1   | 3,761,277(2,901,080-4,917,886) | 3   | -1.84(-3.28,-0.37) | -2.93(-3.80,-2.06) | 4.52(3.02,6.03)    | -0.28(-1.09,0.54)  | 139 |
| Democratic People's Republic of Korea | 118,674(91,746-154,172)        | 47  | 125,030(104,366-149,850)       | 60  | 1.66(1.38,1.94)    | -0.42(-0.68,-0.16) | -0.76(-0.89,-0.63) | 0.08(-0.06,0.22)   | 120 |
| Taiwan (Province of China)            | 109,542(89,621-138,262)        | 50  | 93,573(77,453-114,413)         | 70  | 1.31(0.98,1.65)    | -0.83(-0.92,-0.74) | -2.43(-3.21,-1.65) | -0.67(-0.94,-0.40) | 160 |
| Cambodia                              | 48,263(36,532-62,561)          | 83  | 69,235(54,268-89,011)          | 82  | 0.43(0.36,0.50)    | 0.98(0.93,1.03)    | 2.48(2.12,2.84)    | 1.25(1.14,1.37)    | 59  |
| Indonesia                             | 1,144,668(911,938-1,458,820)   | 5   | 1,309,435(1,067,022-1,619,267) | 6   | -0.44(-0.89,0.00)  | 2.03(1.76,2.30)    | -0.07(-0.26,0.12)  | 0.42(0.23,0.60)    | 106 |
| Lao People's Democratic Republic      | 21,011(16,474-26,343)          | 126 | 26,664(21,626-33,304)          | 120 | 1.46(1.38,1.55)    | 0.31(0.28,0.34)    | 0.76(0.62,0.90)    | 0.80(0.75,0.86)    | 82  |
| Malaysia                              | 89,348(72,675-110,475)         | 55  | 125,336(100,251-162,124)       | 59  | 2.26(2.18,2.34)    | 1.32(1.28,1.35)    | 0.18(0.04,0.32)    | 1.18(1.13,1.24)    | 61  |
| Maldives                              | 1,807(1,399-2,359)             | 173 | 1,802(1,385-2,325)             | 174 | -0.49(-0.71,-0.27) | -1.30(-1.42,-1.19) | 2.03(1.80,2.25)    | -0.02(-0.13,0.10)  | 125 |
| Myanmar                               | 163,560(135,057-200,507)       | 38  | 187,024(158,584-224,646)       | 42  | 0.07(0.01,0.14)    | 0.24(0.21,0.26)    | 1.17(1.10,1.24)    | 0.47(0.43,0.50)    | 101 |
| Philippines                           | 700,810(541,729-932,067)       | 9   | 880,783(690,740-1,142,589)     | 7   | 0.64(0.49,0.79)    | 0.80(0.78,0.82)    | 0.92(0.79,1.06)    | 0.79(0.73,0.85)    | 84  |
| Sri Lanka                             | 86,653(71,565-105,206)         | 58  | 119,666(102,098-140,634)       | 61  | 1.03(1.01,1.04)    | 1.16(1.12,1.19)    | 1.17(1.12,1.23)    | 1.12(1.10,1.14)    | 65  |
| Thailand                              | 305,923(251,864-375,467)       | 22  | 294,343(245,694-351,332)       | 25  | 0.29(0.25,0.33)    | -0.80(-1.03,-0.56) | 0.46(0.18,0.73)    | -0.17(-0.31,-0.03) | 133 |
| Timor-Leste                           | 5,259(4,112-6,728)             | 154 | 7,320(5,804-9,235)             | 153 | 0.81(0.65,0.97)    | 0.91(0.84,0.98)    | 1.81(1.65,1.98)    | 1.13(1.05,1.22)    | 64  |
| Viet Nam                              | 316,948(242,714-415,096)       | 21  | 419,716(345,209-519,094)       | 17  | 2.11(1.67,2.55)    | -0.76(-1.02,-0.49) | 1.59(1.40,1.79)    | 0.99(0.79,1.19)    | 73  |
| Fiji                                  | 5,226(4,294-6,363)             | 155 | 4,774(3,952-5,864)             | 161 | -0.12(-0.24,0.00)  | -1.17(-1.27,-1.07) | 0.47(0.27,0.66)    | -0.31(-0.39,-0.22) | 142 |
| Kiribati                              | 706(587-846)                   | 187 | 829(700-989)                   | 183 | 0.79(0.73,0.85)    | 0.41(0.39,0.43)    | 0.48(0.42,0.54)    | 0.54(0.52,0.57)    | 97  |
| Marshall Islands                      | 317(249-399)                   | 193 | 294(230-369)                   | 194 | -0.66(-0.72,-0.60) | -0.93(-0.99,-0.86) | 1.14(0.59,1.70)    | -0.21(-0.38,-0.03) | 135 |

|                                  |                              |     |                          |     |                    |                    |                    |                    |     |
|----------------------------------|------------------------------|-----|--------------------------|-----|--------------------|--------------------|--------------------|--------------------|-----|
| Micronesia (Federated States of) | 696(549-860)                 | 188 | 533(410-671)             | 188 | -1.18(-1.28,-1.08) | -1.78(-1.88,-1.67) | 0.35(-0.49,1.21)   | -0.93(-1.20,-0.66) | 173 |
| Papua New Guinea                 | 36,551(29,776-44,187)        | 97  | 71,436(59,528-85,258)    | 80  | 3.24(3.19,3.30)    | 1.58(1.44,1.72)    | 2.21(2.15,2.27)    | 2.32(2.27,2.38)    | 26  |
| Samoa                            | 992(781-1,250)               | 180 | 1,104(840-1,436)         | 179 | -0.79(-1.09,-0.49) | -0.19(-0.30,-0.08) | 2.40(2.03,2.78)    | 0.45(0.27,0.62)    | 104 |
| Solomon Islands                  | 2,291(1,763-2,898)           | 167 | 4,079(3,155-5,349)       | 163 | 1.68(0.94,2.42)    | 1.11(0.86,1.35)    | 3.65(3.15,4.16)    | 2.13(1.81,2.44)    | 34  |
| Tonga                            | 740(571-972)                 | 185 | 665(507-862)             | 185 | -0.19(-0.68,0.30)  | -0.82(-0.99,-0.64) | 0.12(-0.27,0.51)   | -0.29(-0.51,-0.06) | 140 |
| Vanuatu                          | 949(744-1,195)               | 181 | 1,674(1,182-2,220)       | 175 | 0.88(0.77,0.98)    | 0.88(0.77,0.98)    | 4.98(2.70,7.30)    | 2.13(1.43,2.84)    | 33  |
| Armenia                          | 11,792(8,825-15,398)         | 141 | 9,170(6,954-11,748)      | 146 | -1.67(-1.83,-1.51) | -1.58(-1.77,-1.39) | 0.90(0.68,1.13)    | -0.82(-0.94,-0.70) | 168 |
| Azerbaijan                       | 27,166(20,647-35,719)        | 112 | 31,120(24,185-39,603)    | 111 | 0.18(0.02,0.34)    | -0.51(-0.71,-0.31) | 2.04(1.84,2.24)    | 0.52(0.40,0.63)    | 99  |
| Georgia                          | 18,200(15,030-22,577)        | 129 | 10,669(8,371-13,595)     | 143 | -2.53(-3.08,-1.98) | -2.31(-2.52,-2.09) | -0.05(-0.59,0.49)  | -1.71(-1.98,-1.44) | 193 |
| Kazakhstan                       | 46,707(35,961-59,441)        | 85  | 51,667(39,763-66,586)    | 90  | -2.68(-2.87,-2.49) | 0.30(0.14,0.46)    | 3.68(3.41,3.95)    | 0.41(0.28,0.54)    | 107 |
| Kyrgyzstan                       | 22,756(17,759-29,523)        | 123 | 27,312(20,367-36,254)    | 118 | -0.39(-0.50,-0.28) | 0.06(0.00,0.12)    | 2.27(2.16,2.39)    | 0.61(0.55,0.67)    | 92  |
| Mongolia                         | 9,204(6,939-12,103)          | 144 | 12,167(9,209-16,024)     | 137 | -0.41(-0.45,-0.36) | 0.09(-0.09,0.27)   | 3.46(3.16,3.76)    | 0.99(0.87,1.11)    | 74  |
| Tajikistan                       | 24,037(17,713-31,916)        | 117 | 37,084(27,174-49,748)    | 102 | 0.79(0.67,0.91)    | 0.74(0.54,0.94)    | 3.16(2.94,3.38)    | 1.55(1.44,1.66)    | 52  |
| Turkmenistan                     | 18,128(13,972-23,927)        | 130 | 17,965(13,165-24,197)    | 134 | -0.66(-0.87,-0.45) | -1.31(-1.49,-1.13) | 2.13(1.86,2.40)    | -0.02(-0.16,0.13)  | 124 |
| Uzbekistan                       | 121,609(93,738-156,959)      | 45  | 156,519(121,361-202,861) | 48  | 1.27(1.15,1.39)    | -0.39(-0.50,-0.27) | 1.87(1.68,2.06)    | 0.86(0.76,0.95)    | 77  |
| Albania                          | 13,983(11,277-17,833)        | 138 | 11,128(9,289-13,443)     | 141 | -1.43(-1.79,-1.06) | -0.64(-1.49,0.22)  | -0.49(-2.17,1.23)  | -0.84(-1.47,-0.21) | 169 |
| Bosnia and Herzegovina           | 27,549(22,584-33,810)        | 110 | 18,567(15,591-22,069)    | 133 | -1.55(-1.92,-1.19) | -1.24(-1.47,-1.00) | -1.63(-1.69,-1.58) | -1.44(-1.59,-1.29) | 187 |
| Bulgaria                         | 47,566(39,626-56,988)        | 84  | 29,693(24,391-35,437)    | 116 | -2.16(-2.50,-1.82) | -1.59(-1.68,-1.49) | -0.89(-1.17,-0.61) | -1.60(-1.75,-1.44) | 192 |
| Croatia                          | 33,293(27,579-39,628)        | 102 | 21,661(18,388-25,717)    | 126 | -1.51(-1.68,-1.34) | -1.94(-2.02,-1.87) | -0.85(-1.03,-0.68) | -1.49(-1.58,-1.40) | 189 |
| Czechia                          | 43,446(34,824-53,283)        | 91  | 40,127(32,774-48,307)    | 99  | -1.30(-1.74,-0.85) | -0.41(-0.57,-0.24) | 1.25(0.88,1.62)    | -0.22(-0.43,-0.01) | 136 |
| Hungary                          | 52,953(43,611-63,131)        | 78  | 37,786(31,130-45,481)    | 101 | -1.26(-1.65,-0.86) | -1.11(-1.59,-0.63) | -1.21(-1.46,-0.96) | -1.24(-1.46,-1.01) | 186 |
| North Macedonia                  | 16,818(13,381-20,945)        | 133 | 14,379(12,304-16,608)    | 135 | 0.27(0.06,0.48)    | -1.99(-2.19,-1.80) | 0.08(-0.15,0.32)   | -0.63(-0.77,-0.50) | 156 |
| Montenegro                       | 2,984(2,334-3,744)           | 163 | 2,844(2,285-3,542)       | 166 | -0.53(-0.57,-0.50) | -0.53(-0.57,-0.50) | 0.89(0.21,1.57)    | -0.10(-0.31,0.11)  | 130 |
| Poland                           | 404,892(337,325-483,495)     | 16  | 248,710(204,209-303,393) | 33  | -1.23(-1.97,-0.48) | -2.62(-2.77,-2.46) | -1.22(-1.33,-1.11) | -1.75(-1.99,-1.50) | 195 |
| Romania                          | 137,397(112,170-169,647)     | 42  | 96,468(78,601-118,131)   | 69  | -0.97(-1.13,-0.81) | -1.56(-1.65,-1.47) | -1.20(-1.36,-1.03) | -1.24(-1.33,-1.15) | 185 |
| Serbia                           | 42,740(35,775-51,420)        | 92  | 34,347(28,904-40,784)    | 108 | -0.44(-0.99,0.11)  | -1.25(-1.36,-1.15) | -0.62(-0.78,-0.46) | -0.81(-0.99,-0.63) | 167 |
| Slovakia                         | 22,833(18,404-28,240)        | 122 | 19,981(16,346-24,301)    | 132 | -0.74(-0.99,-0.50) | -0.61(-0.69,-0.53) | 0.14(-0.07,0.35)   | -0.44(-0.55,-0.33) | 148 |
| Slovenia                         | 14,056(11,860-16,795)        | 137 | 11,279(9,385-13,555)     | 140 | -1.06(-1.24,-0.88) | -1.08(-1.16,-0.99) | -0.02(-0.12,0.08)  | -0.77(-0.84,-0.69) | 165 |
| Belarus                          | 70,196(57,661-85,639)        | 68  | 42,427(34,444-52,940)    | 97  | -2.20(-2.40,-2.00) | -3.09(-3.22,-2.97) | 0.30(0.09,0.51)    | -1.74(-1.86,-1.63) | 194 |
| Estonia                          | 6,300(5,202-7,513)           | 149 | 3,679(2,963-4,523)       | 165 | -2.68(-2.83,-2.54) | -4.17(-4.48,-3.86) | 1.29(0.80,1.78)    | -1.85(-2.05,-1.64) | 198 |
| Latvia                           | 15,608(13,271-18,346)        | 135 | 7,692(6,238-9,424)       | 152 | -3.47(-3.56,-3.37) | -2.52(-2.55,-2.49) | -1.06(-1.14,-0.98) | -2.40(-2.45,-2.36) | 203 |
| Lithuania                        | 16,534(13,646-19,801)        | 134 | 9,591(7,695-11,731)      | 145 | -2.17(-2.25,-2.09) | -2.49(-2.91,-2.06) | -0.89(-1.26,-0.51) | -1.87(-2.06,-1.68) | 199 |
| Republic of Moldova              | 23,650(18,894-30,030)        | 119 | 12,857(10,117-16,200)    | 136 | -2.36(-2.51,-2.22) | -2.97(-3.05,-2.88) | -0.79(-0.98,-0.60) | -2.08(-2.17,-1.99) | 200 |
| Russian Federation               | 977,005(798,115-1,207,341)   | 7   | 507,709(393,295-649,532) | 16  | -2.71(-2.93,-2.50) | -3.84(-3.97,-3.71) | 0.07(-0.25,0.40)   | -2.24(-2.39,-2.10) | 202 |
| Ukraine                          | 324,089(253,447-407,276)     | 20  | 171,318(130,593-221,689) | 45  | -2.63(-2.94,-2.31) | -3.92(-4.16,-3.68) | 0.44(-0.07,0.95)   | -2.13(-2.36,-1.90) | 201 |
| Brunei Darussalam                | 1,621(1,266-2,082)           | 176 | 2,225(1,794-2,741)       | 170 | 1.90(1.81,1.99)    | 0.41(0.31,0.51)    | 1.12(1.06,1.19)    | 1.09(1.03,1.14)    | 70  |
| Japan                            | 1,125,260(945,376-1,347,003) | 6   | 561,688(467,115-676,760) | 12  | -2.48(-2.74,-2.22) | -4.47(-4.80,-4.15) | -0.05(-0.28,0.17)  | -2.50(-2.67,-2.32) | 204 |
| Republic of Korea                | 225,485(186,171-274,992)     | 31  | 211,096(177,800-250,593) | 39  | -0.29(-1.10,0.53)  | -0.48(-0.62,-0.33) | 0.13(-0.10,0.36)   | -0.23(-0.50,0.04)  | 137 |



|                          |                                |     |                                |     |                    |                    |                    |                    |     |
|--------------------------|--------------------------------|-----|--------------------------------|-----|--------------------|--------------------|--------------------|--------------------|-----|
| Singapore                | 18,885(15,740-22,491)          | 128 | 20,940(17,119-25,927)          | 131 | 0.85(0.51,1.18)    | -0.43(-0.60,-0.25) | 1.05(0.92,1.19)    | 0.41(0.26,0.57)    | 110 |
| Australia                | 107,870(85,156-130,818)        | 51  | 115,111(91,823-143,929)        | 62  | 1.40(1.01,1.79)    | -2.12(-2.36,-1.88) | 1.21(1.04,1.38)    | 0.20(0.04,0.36)    | 117 |
| New Zealand              | 30,039(23,956-37,292)          | 106 | 24,801(19,022-31,981)          | 122 | -0.99(-1.14,-0.83) | -0.67(-0.83,-0.51) | -0.13(-0.18,-0.08) | -0.67(-0.75,-0.59) | 161 |
| Andorra                  | 237(193-288)                   | 196 | 294(237-357)                   | 195 | 1.02(-0.12,2.17)   | 1.40(-0.66,3.51)   | -0.50(-0.81,-0.19) | 0.56(-0.20,1.32)   | 94  |
| Austria                  | 37,442(31,564-44,051)          | 96  | 31,023(25,355-37,384)          | 112 | -0.71(-0.90,-0.51) | -0.87(-0.93,-0.81) | -0.18(-0.51,0.14)  | -0.65(-0.77,-0.52) | 157 |
| Belgium                  | 51,973(44,031-61,440)          | 80  | 38,372(30,877-46,541)          | 100 | -3.08(-3.60,-2.57) | 0.51(0.16,0.86)    | -0.48(-0.76,-0.20) | -1.17(-1.41,-0.94) | 184 |
| Cyprus                   | 4,223(3,409-5,168)             | 159 | 5,904(4,824-7,170)             | 157 | 0.58(0.43,0.73)    | 1.36(1.34,1.39)    | 1.52(1.45,1.59)    | 1.17(1.11,1.22)    | 62  |
| Denmark                  | 24,837(21,105-29,236)          | 114 | 21,389(17,118-26,111)          | 129 | 0.10(-0.24,0.43)   | -0.66(-0.76,-0.56) | -0.92(-1.67,-0.16) | -0.51(-0.77,-0.25) | 151 |
| Finland                  | 21,654(17,981-25,795)          | 124 | 21,422(17,782-25,614)          | 128 | 0.62(0.44,0.79)    | 0.23(0.18,0.27)    | -0.97(-1.25,-0.70) | -0.03(-0.13,0.08)  | 126 |
| France                   | 358,433(306,546-423,696)       | 18  | 296,162(244,156-357,363)       | 24  | -1.48(-1.83,-1.13) | -0.63(-0.68,-0.59) | 0.06(-0.24,0.36)   | -0.68(-0.83,-0.53) | 162 |
| Germany                  | 426,768(350,281-492,725)       | 14  | 246,835(201,445-300,847)       | 35  | -4.79(-5.04,-4.55) | -0.13(-0.46,0.21)  | -0.85(-1.26,-0.44) | -1.83(-2.03,-1.64) | 197 |
| Greece                   | 45,512(37,481-54,777)          | 87  | 36,458(29,722-43,718)          | 103 | -0.63(-0.69,-0.57) | -0.33(-0.40,-0.25) | -1.39(-1.57,-1.22) | -0.76(-0.83,-0.70) | 164 |
| Iceland                  | 2,045(1,646-2,502)             | 172 | 2,045(1,644-2,531)             | 172 | 0.18(-0.19,0.54)   | -0.58(-0.74,-0.42) | 0.35(0.07,0.64)    | 0.00(-0.18,0.17)   | 123 |
| Ireland                  | 24,567(20,137-29,875)          | 115 | 22,572(17,932-27,554)          | 125 | -1.27(-1.40,-1.14) | 0.64(0.48,0.80)    | -0.37(-1.10,0.37)  | -0.33(-0.57,-0.09) | 143 |
| Israel                   | 26,386(20,991-32,364)          | 113 | 40,691(31,597-50,555)          | 98  | 1.23(1.12,1.34)    | 1.42(1.38,1.46)    | 1.99(1.92,2.07)    | 1.50(1.45,1.55)    | 53  |
| Italy                    | 305,423(255,392-360,502)       | 23  | 207,135(166,868-249,393)       | 40  | -1.47(-2.16,-0.77) | -2.04(-2.32,-1.76) | -0.65(-0.92,-0.39) | -1.45(-1.74,-1.15) | 188 |
| Luxembourg               | 2,126(1,751-2,793)             | 170 | 2,627(2,167-3,167)             | 168 | 1.03(0.88,1.18)    | -0.04(-0.09,0.01)  | 1.34(1.06,1.62)    | 0.72(0.62,0.82)    | 87  |
| Malta                    | 2,268(1,908-2,665)             | 168 | 1,954(1,612-2,344)             | 173 | -0.23(-0.40,-0.05) | -0.88(-0.91,-0.86) | -0.39(-0.58,-0.21) | -0.53(-0.61,-0.45) | 153 |
| Netherlands              | 49,068(41,428-57,168)          | 82  | 49,024(40,777-57,277)          | 93  | 0.26(0.21,0.30)    | -1.36(-1.56,-1.16) | 1.22(1.16,1.28)    | 0.00(-0.07,0.07)   | 122 |
| Norway                   | 35,454(29,475-42,022)          | 100 | 28,099(22,567-34,592)          | 117 | -0.82(-1.57,-0.07) | -1.23(-1.34,-1.12) | -0.23(-0.60,0.13)  | -0.79(-1.06,-0.53) | 166 |
| Portugal                 | 70,880(58,660-86,166)          | 67  | 54,441(45,601-63,883)          | 86  | -1.49(-2.01,-0.96) | 0.45(0.15,0.76)    | -1.52(-1.73,-1.32) | -1.01(-1.23,-0.79) | 178 |
| Spain                    | 164,254(134,983-198,520)       | 37  | 173,292(142,545-207,590)       | 44  | -1.26(-1.37,-1.16) | 2.00(1.87,2.14)    | -0.27(-0.62,0.09)  | 0.18(0.05,0.30)    | 118 |
| Sweden                   | 69,111(57,306-81,250)          | 69  | 52,430(42,260-64,149)          | 88  | -3.29(-3.57,-3.00) | -1.39(-1.99,-0.80) | 1.45(-0.09,3.00)   | -1.15(-1.68,-0.62) | 182 |
| Switzerland              | 37,615(31,627-44,284)          | 95  | 36,015(29,402-43,182)          | 104 | -0.36(-0.41,-0.31) | -1.02(-1.05,-0.99) | 0.90(0.80,1.00)    | -0.17(-0.21,-0.13) | 134 |
| United Kingdom           | 488,938(403,446-586,816)       | 11  | 415,532(338,537-506,097)       | 18  | -1.17(-1.83,-0.50) | -0.49(-0.59,-0.38) | -0.12(-0.76,0.52)  | -0.58(-0.88,-0.29) | 154 |
| Argentina                | 258,500(214,737-317,352)       | 30  | 326,712(263,862-406,380)       | 21  | 0.95(0.78,1.12)    | 0.97(0.93,1.02)    | 0.45(0.37,0.54)    | 0.81(0.74,0.87)    | 81  |
| Chile                    | 86,681(70,648-107,853)         | 57  | 105,914(86,981-129,139)        | 64  | 0.94(0.69,1.19)    | -0.66(-0.89,-0.43) | 2.02(1.53,2.51)    | 0.72(0.52,0.93)    | 85  |
| Uruguay                  | 23,194(19,260-28,100)          | 121 | 21,081(17,308-25,812)          | 130 | -0.20(-0.36,-0.03) | -0.78(-0.90,-0.65) | 0.07(-0.05,0.19)   | -0.34(-0.42,-0.25) | 144 |
| Canada                   | 201,721(164,225-248,004)       | 32  | 222,741(183,176-270,681)       | 36  | 0.47(0.09,0.85)    | 0.94(0.82,1.06)    | -0.30(-0.93,0.33)  | 0.41(0.17,0.64)    | 108 |
| United States of America | 3,166,265(2,518,593-4,064,450) | 3   | 4,143,124(3,475,553-4,948,182) | 2   | -2.24(-2.72,-1.77) | 3.35(2.96,3.75)    | 1.44(1.14,1.75)    | 1.01(0.76,1.27)    | 72  |
| Antigua and Barbuda      | 566(437-743)                   | 189 | 611(474-769)                   | 186 | 1.61(1.22,1.99)    | -0.22(-0.33,-0.12) | -0.47(-0.74,-0.20) | 0.32(0.16,0.48)    | 113 |
| Bahamas                  | 2,410(1,866-3,139)             | 165 | 2,711(2,100-3,430)             | 167 | 1.85(1.62,2.07)    | 0.22(0.01,0.44)    | -0.55(-0.73,-0.37) | 0.45(0.34,0.57)    | 103 |
| Barbados                 | 2,226(1,794-2,781)             | 169 | 2,186(1,771-2,699)             | 171 | -0.43(-0.59,-0.28) | 1.06(0.97,1.15)    | -0.70(-0.76,-0.63) | -0.07(-0.13,-0.01) | 129 |
| Belize                   | 2,423(1,841-3,105)             | 164 | 3,835(2,948-4,888)             | 164 | 1.31(0.81,1.81)    | 2.38(2.03,2.74)    | 1.24(1.07,1.41)    | 1.60(1.39,1.81)    | 51  |
| Cuba                     | 105,398(82,977-132,494)        | 52  | 80,767(64,553-99,384)          | 73  | -0.99(-1.07,-0.92) | -1.36(-1.68,-1.05) | -0.55(-0.91,-0.19) | -0.95(-1.10,-0.79) | 176 |
| Dominica                 | 790(621-1,002)                 | 184 | 569(454-708)                   | 187 | -0.44(-0.51,-0.37) | -1.19(-1.44,-0.94) | -1.60(-1.74,-1.45) | -1.09(-1.18,-0.99) | 180 |
| Dominican Republic       | 64,526(49,923-81,246)          | 71  | 74,999(58,204-96,702)          | 77  | -0.65(-0.86,-0.43) | 1.07(0.81,1.34)    | 1.47(1.09,1.85)    | 0.64(0.47,0.82)    | 91  |
| Grenada                  | 1,052(795-1,363)               | 179 | 915(728-1,162)                 | 181 | 0.39(0.23,0.56)    | -0.77(-0.81,-0.72) | -1.07(-1.19,-0.96) | -0.48(-0.55,-0.41) | 149 |

|                                    |                                |     |                                |     |                    |                    |                    |                    |     |
|------------------------------------|--------------------------------|-----|--------------------------------|-----|--------------------|--------------------|--------------------|--------------------|-----|
| Guyana                             | 8,881(6,955-11,276)            | 145 | 7,207(5,663-9,087)             | 154 | -0.04(-0.20,0.12)  | -1.91(-2.02,-1.80) | -0.06(-0.31,0.19)  | -0.69(-0.80,-0.59) | 163 |
| Haiti                              | 102,139(79,276-126,979)        | 53  | 150,751(119,070-188,223)       | 50  | 1.59(1.45,1.73)    | 1.05(1.01,1.09)    | 1.51(1.40,1.62)    | 1.36(1.30,1.42)    | 56  |
| Jamaica                            | 28,627(22,099-36,890)          | 108 | 21,612(16,953-27,391)          | 127 | -0.10(-0.33,0.13)  | -1.66(-1.77,-1.55) | -0.91(-1.08,-0.73) | -0.93(-1.04,-0.82) | 174 |
| Saint Lucia                        | 1,693(1,315-2,153)             | 174 | 1,308(1,048-1,603)             | 178 | 0.29(0.18,0.41)    | -1.53(-1.66,-1.41) | -1.29(-1.41,-1.17) | -0.88(-0.96,-0.79) | 170 |
| Saint Vincent and the Grenadines   | 1,205(926-1,563)               | 177 | 864(678-1,093)                 | 182 | -1.26(-1.29,-1.23) | -1.35(-1.39,-1.31) | -0.64(-0.94,-0.34) | -1.11(-1.20,-1.01) | 181 |
| Suriname                           | 3,862(2,965-5,061)             | 160 | 4,616(3,572-5,908)             | 162 | 0.33(-0.03,0.68)   | 0.94(0.82,1.07)    | 0.61(0.51,0.71)    | 0.66(0.52,0.81)    | 89  |
| Trinidad and Tobago                | 9,769(7,559-12,586)            | 143 | 8,338(6,447-10,735)            | 151 | -1.89(-1.98,-1.81) | -0.89(-0.93,-0.85) | 1.34(0.98,1.70)    | -0.52(-0.63,-0.40) | 152 |
| Bolivia (Plurinational State of)   | 85,462(63,523-109,707)         | 60  | 106,608(79,183-144,003)        | 63  | 0.91(0.73,1.09)    | -0.39(-0.48,-0.30) | 2.06(1.84,2.28)    | 0.80(0.69,0.90)    | 83  |
| Ecuador                            | 115,768(85,198-151,654)        | 48  | 127,879(93,983-172,623)        | 58  | -0.34(-0.74,0.07)  | -0.22(-0.38,-0.06) | 1.83(1.69,1.97)    | 0.36(0.19,0.52)    | 112 |
| Peru                               | 271,620(199,167-355,757)       | 27  | 249,734(185,262-337,734)       | 32  | -0.38(-0.50,-0.25) | -2.15(-2.44,-1.86) | 1.98(1.85,2.11)    | -0.31(-0.45,-0.16) | 141 |
| Colombia                           | 283,260(216,120-366,723)       | 25  | 256,255(193,451-332,665)       | 30  | 0.15(-0.15,0.44)   | -0.59(-0.69,-0.49) | -0.45(-0.73,-0.17) | -0.36(-0.50,-0.22) | 145 |
| Costa Rica                         | 35,127(26,816-44,964)          | 101 | 34,390(26,692-43,945)          | 107 | 2.25(2.16,2.34)    | -2.07(-2.31,-1.84) | -0.22(-0.33,-0.12) | -0.06(-0.16,0.03)  | 128 |
| El Salvador                        | 80,440(60,576-103,848)         | 62  | 51,853(40,329-67,188)          | 89  | -0.71(-0.90,-0.52) | -2.91(-3.04,-2.78) | -0.61(-0.74,-0.47) | -1.53(-1.63,-1.43) | 190 |
| Guatemala                          | 100,926(75,835-128,430)        | 54  | 105,272(77,884-140,749)        | 66  | 0.52(0.23,0.82)    | -1.08(-1.73,-0.42) | 0.98(0.89,1.07)    | 0.11(-0.13,0.36)   | 119 |
| Honduras                           | 62,863(46,702-81,126)          | 72  | 73,991(55,648-97,341)          | 78  | 1.19(0.92,1.46)    | -0.28(-0.35,-0.21) | 0.98(0.70,1.27)    | 0.56(0.44,0.69)    | 95  |
| Mexico                             | 617,319(455,781-841,052)       | 10  | 606,000(433,053-811,132)       | 10  | -1.01(-1.35,-0.68) | -0.09(-0.38,0.19)  | 1.30(1.21,1.39)    | -0.04(-0.20,0.13)  | 127 |
| Nicaragua                          | 52,518(39,045-68,940)          | 79  | 44,738(33,360-59,048)          | 96  | -0.57(-0.83,-0.31) | -0.78(-0.99,-0.57) | -0.30(-0.49,-0.10) | -0.60(-0.73,-0.47) | 155 |
| Panama                             | 23,974(18,619-30,295)          | 118 | 30,412(23,119-39,435)          | 115 | 0.95(0.82,1.07)    | 0.35(0.27,0.43)    | 1.30(1.17,1.43)    | 0.83(0.76,0.90)    | 80  |
| Venezuela (Bolivarian Republic of) | 179,203(135,096-234,165)       | 35  | 169,708(128,442-218,919)       | 46  | 0.59(0.29,0.88)    | -0.08(-0.17,0.01)  | -1.22(-1.48,-0.95) | -0.27(-0.42,-0.13) | 138 |
| Brazil                             | 1,797,924(1,305,007-2,425,965) | 4   | 1,623,152(1,165,808-2,128,603) | 4   | -0.44(-0.68,-0.19) | -1.28(-1.34,-1.22) | 0.77(0.49,1.04)    | -0.39(-0.50,-0.27) | 146 |
| Paraguay                           | 43,769(31,879-59,231)          | 89  | 63,305(46,892-84,222)          | 83  | 1.93(1.82,2.04)    | 0.95(0.92,0.99)    | 0.95(0.92,0.99)    | 1.26(1.22,1.30)    | 58  |
| Algeria                            | 146,771(114,676-189,342)       | 40  | 218,593(170,849-280,218)       | 37  | 0.72(0.66,0.78)    | 0.72(0.66,0.78)    | 2.78(1.87,3.71)    | 1.36(1.07,1.64)    | 55  |
| Bahrain                            | 3,234(2,538-4,109)             | 162 | 6,166(4,904-7,614)             | 156 | 1.95(1.81,2.09)    | 4.15(3.93,4.38)    | 0.76(0.61,0.91)    | 2.21(2.11,2.31)    | 29  |
| Egypt                              | 372,153(287,409-474,733)       | 17  | 566,303(441,856-720,245)       | 11  | 0.47(0.40,0.54)    | 1.44(1.37,1.51)    | 2.53(2.35,2.72)    | 1.47(1.39,1.54)    | 54  |
| Iran (Islamic Republic of)         | 433,579(323,087-565,952)       | 13  | 415,328(327,426-524,205)       | 19  | -0.05(-0.11,0.01)  | -1.15(-1.21,-1.09) | 0.92(0.69,1.15)    | -0.13(-0.21,-0.06) | 131 |
| Iraq                               | 145,551(110,802-186,951)       | 41  | 248,615(190,297-326,436)       | 34  | 3.47(3.13,3.82)    | 0.91(0.28,1.54)    | 1.30(1.19,1.41)    | 1.88(1.65,2.12)    | 43  |
| Jordan                             | 28,502(21,329-38,171)          | 109 | 76,042(57,525-98,883)          | 75  | 1.82(1.74,1.91)    | 3.85(3.34,4.37)    | 4.91(4.76,5.06)    | 3.47(3.28,3.65)    | 6   |
| Kuwait                             | 11,941(9,206-15,130)           | 140 | 23,469(18,102-29,633)          | 123 | -0.67(-1.00,-0.34) | 3.91(3.49,4.32)    | 3.87(3.67,4.07)    | 2.38(2.19,2.56)    | 23  |
| Lebanon                            | 24,091(18,971-30,902)          | 116 | 33,802(26,857-42,067)          | 110 | 0.19(0.08,0.30)    | 0.46(0.13,0.79)    | 2.85(2.01,3.70)    | 1.11(0.82,1.41)    | 66  |
| Libya                              | 30,503(22,889-39,126)          | 104 | 34,125(27,520-41,641)          | 109 | 0.36(0.27,0.45)    | 0.78(0.69,0.86)    | 0.12(-0.03,0.27)   | 0.41(0.35,0.48)    | 109 |
| Morocco                            | 127,525(99,425-160,957)        | 43  | 166,275(133,121-205,765)       | 47  | 1.17(1.11,1.24)    | 0.64(0.61,0.67)    | 1.03(0.93,1.12)    | 0.93(0.89,0.96)    | 76  |
| Palestine                          | 14,335(10,683-18,994)          | 136 | 30,541(22,825-40,046)          | 114 | 2.74(2.38,3.10)    | 3.05(2.97,3.13)    | 2.18(1.97,2.39)    | 2.68(2.55,2.82)    | 16  |
| Oman                               | 11,310(8,635-14,877)           | 142 | 25,413(19,975-32,469)          | 121 | 0.69(0.50,0.88)    | 2.29(1.62,2.96)    | 5.25(4.30,6.20)    | 2.77(2.40,3.14)    | 15  |
| Qatar                              | 2,356(1,795-3,106)             | 166 | 11,544(9,156-14,313)           | 139 | 2.52(2.35,2.69)    | 6.86(6.02,7.72)    | 7.58(7.27,7.90)    | 5.68(5.38,5.97)    | 1   |
| Saudi Arabia                       | 71,233(53,674-92,870)          | 66  | 132,867(105,713-165,421)       | 55  | 1.93(1.80,2.06)    | 2.55(1.97,3.13)    | 1.95(1.61,2.30)    | 2.11(1.90,2.33)    | 35  |
| Syrian Arab Republic               | 85,909(66,729-110,565)         | 59  | 76,301(60,880-93,829)          | 74  | -0.04(-0.51,0.44)  | 3.70(2.80,4.60)    | -6.12(-7.76,-4.46) | -0.66(-1.31,0.00)  | 159 |
| Tunisia                            | 51,650(40,706-66,023)          | 81  | 60,869(49,618-74,973)          | 85  | 0.82(0.76,0.88)    | -0.14(-0.21,-0.08) | 1.11(0.94,1.28)    | 0.58(0.52,0.64)    | 93  |
| Turkey                             | 463,869(371,308-575,459)       | 12  | 515,559(435,559-611,836)       | 15  | 1.02(0.82,1.23)    | -1.80(-2.36,-1.23) | 2.46(2.22,2.71)    | 0.42(0.19,0.65)    | 105 |

|                                  |                                |     |                                |     |                    |                    |                    |                    |     |
|----------------------------------|--------------------------------|-----|--------------------------------|-----|--------------------|--------------------|--------------------|--------------------|-----|
| United Arab Emirates             | 16,920(13,464-21,031)          | 132 | 62,279(50,671-76,301)          | 84  | 4.44(4.00,4.87)    | 8.84(7.94,9.76)    | -0.42(-1.21,0.38)  | 4.43(3.96,4.89)    | 2   |
| Yemen                            | 114,730(88,261-148,175)        | 49  | 214,371(161,770-277,934)       | 38  | 2.09(2.00,2.18)    | 2.28(2.25,2.30)    | 2.19(2.05,2.32)    | 2.18(2.13,2.24)    | 31  |
| Afghanistan                      | 84,606(67,675-104,961)         | 61  | 281,631(217,451-363,785)       | 27  | 5.99(3.81,8.22)    | 3.40(3.26,3.54)    | 3.40(3.26,3.54)    | 4.20(3.52,4.88)    | 3   |
| Bangladesh                       | 264,877(220,069-322,695)       | 29  | 312,711(266,091-366,796)       | 22  | 1.26(1.03,1.49)    | -0.43(-0.53,-0.33) | 0.99(0.53,1.45)    | 0.53(0.37,0.70)    | 98  |
| Bhutan                           | 1,650(1,374-1,995)             | 175 | 1,483(1,276-1,752)             | 176 | 0.21(-0.50,0.93)   | -0.96(-1.29,-0.64) | -0.37(-0.49,-0.25) | -0.41(-0.67,-0.15) | 147 |
| India                            | 3,251,059(2,645,599-4,094,151) | 2   | 4,533,398(3,732,737-5,478,018) | 1   | -3.16(-4.38,-1.92) | 5.58(3.71,7.48)    | 0.74(-0.06,1.55)   | 0.99(0.24,1.74)    | 75  |
| Nepal                            | 35,563(29,868-42,996)          | 99  | 48,737(41,233-57,616)          | 94  | 1.38(1.27,1.48)    | -0.16(-0.33,0.02)  | 2.28(1.94,2.63)    | 1.11(0.98,1.24)    | 68  |
| Pakistan                         | 348,466(276,260-442,692)       | 19  | 541,633(435,288-685,684)       | 13  | 2.50(1.08,3.94)    | 1.43(1.26,1.60)    | 1.43(1.26,1.60)    | 1.76(1.31,2.21)    | 48  |
| Angola                           | 89,170(69,442-112,095)         | 56  | 201,117(151,493-261,730)       | 41  | 3.39(3.37,3.42)    | 2.58(2.55,2.61)    | 2.55(2.47,2.63)    | 2.85(2.82,2.88)    | 14  |
| Central African Republic         | 21,634(17,002-27,150)          | 125 | 34,817(27,207-44,222)          | 105 | 2.23(2.19,2.28)    | 1.69(1.64,1.74)    | 0.97(0.81,1.13)    | 1.65(1.60,1.71)    | 49  |
| Congo                            | 19,417(15,005-24,815)          | 127 | 34,497(26,347-44,766)          | 106 | 1.90(1.80,2.00)    | 1.70(1.58,1.82)    | 2.51(2.43,2.59)    | 2.00(1.94,2.07)    | 39  |
| Democratic Republic of the Congo | 275,152(206,903-355,149)       | 26  | 530,403(407,988-686,805)       | 14  | 2.06(2.03,2.09)    | 2.41(2.34,2.48)    | 2.44(2.37,2.50)    | 2.29(2.26,2.32)    | 27  |
| Equatorial Guinea                | 3,421(2,598-4,363)             | 161 | 8,388(6,272-11,071)            | 150 | 3.69(3.47,3.91)    | 2.93(2.83,3.02)    | 2.94(2.73,3.15)    | 3.19(3.08,3.30)    | 9   |
| Gabon                            | 6,407(4,950-8,184)             | 148 | 8,875(6,767-11,466)            | 147 | 1.17(1.15,1.19)    | 0.71(0.69,0.72)    | 1.59(1.45,1.74)    | 1.14(1.09,1.18)    | 63  |
| Burundi                          | 60,962(46,800-78,156)          | 73  | 101,676(76,461-130,733)        | 67  | 0.40(0.18,0.62)    | 2.89(2.59,3.19)    | 2.30(1.57,3.05)    | 1.86(1.59,2.12)    | 45  |
| Comoros                          | 4,337(3,328-5,602)             | 158 | 4,947(3,835-6,291)             | 159 | 0.44(0.39,0.48)    | 0.27(0.25,0.29)    | 0.71(0.66,0.75)    | 0.46(0.43,0.48)    | 102 |
| Djibouti                         | 4,977(3,778-6,448)             | 156 | 8,674(6,777-11,283)            | 149 | 1.17(0.90,1.44)    | 1.96(1.66,2.27)    | 2.59(2.51,2.67)    | 1.95(1.82,2.09)    | 40  |
| Eritrea                          | 29,371(22,967-37,337)          | 107 | 52,549(40,268-67,740)          | 87  | 2.98(2.76,3.21)    | 1.85(1.72,1.98)    | 1.29(1.13,1.46)    | 2.05(1.92,2.18)    | 37  |
| Ethiopia                         | 408,660(308,529-542,179)       | 15  | 689,033(494,291-938,485)       | 8   | 1.45(1.40,1.49)    | 1.45(1.40,1.49)    | 2.76(2.47,3.05)    | 1.85(1.76,1.95)    | 47  |
| Kenya                            | 167,476(121,357-228,150)       | 36  | 280,521(205,184-377,311)       | 28  | 1.43(1.14,1.72)    | 1.71(1.57,1.86)    | 2.47(2.17,2.77)    | 1.85(1.69,2.01)    | 46  |
| Madagascar                       | 195,727(153,362-255,113)       | 34  | 273,651(213,853-344,796)       | 29  | 2.05(1.88,2.22)    | 0.21(0.01,0.40)    | 1.29(1.16,1.42)    | 1.10(1.00,1.21)    | 69  |
| Malawi                           | 80,387(60,369-104,319)         | 63  | 137,164(103,069-178,788)       | 54  | 0.54(0.12,0.95)    | 2.20(2.17,2.24)    | 2.77(2.63,2.91)    | 1.86(1.72,2.00)    | 44  |
| Mauritius                        | 6,436(5,210-7,887)             | 147 | 4,778(3,979-5,700)             | 160 | 0.05(-0.03,0.12)   | -1.49(-1.52,-1.46) | -1.51(-1.63,-1.39) | -1.03(-1.08,-0.98) | 179 |
| Mozambique                       | 120,725(92,612-156,418)        | 46  | 255,838(192,943-337,370)       | 31  | 2.79(2.19,3.39)    | 2.05(1.97,2.13)    | 3.02(2.90,3.13)    | 2.61(2.41,2.80)    | 17  |
| Rwanda                           | 122,363(95,242-159,159)        | 44  | 150,237(116,676-191,043)       | 51  | -0.58(-3.54,2.48)  | 1.31(0.78,1.83)    | 0.22(-0.55,1.01)   | 0.38(-0.61,1.38)   | 111 |
| Seychelles                       | 312(247-396)                   | 194 | 375(303-473)                   | 191 | 0.07(-0.06,0.21)   | 0.50(0.47,0.53)    | 1.42(1.31,1.54)    | 0.65(0.60,0.71)    | 90  |
| Somalia                          | 76,901(57,992-98,036)          | 65  | 177,550(137,118-231,482)       | 43  | 3.00(2.81,3.19)    | 2.53(2.45,2.62)    | 3.45(3.37,3.54)    | 2.97(2.89,3.04)    | 10  |
| United Republic of Tanzania      | 296,461(222,485-389,370)       | 24  | 612,808(460,356-799,475)       | 9   | 2.41(2.27,2.56)    | 3.46(3.31,3.61)    | 1.80(1.51,2.09)    | 2.53(2.41,2.65)    | 18  |
| Uganda                           | 198,022(149,950-262,233)       | 33  | 398,032(292,298-528,517)       | 20  | 2.87(2.82,2.91)    | 2.19(2.14,2.24)    | 2.40(2.33,2.47)    | 2.46(2.42,2.49)    | 20  |
| Zambia                           | 43,743(32,947-57,110)          | 90  | 97,999(72,167-129,647)         | 68  | 0.90(0.56,1.25)    | 3.08(2.92,3.23)    | 4.84(4.49,5.19)    | 2.91(2.72,3.09)    | 13  |
| Botswana                         | 5,508(4,222-6,982)             | 153 | 10,019(7,506-13,328)           | 144 | 1.88(1.55,2.21)    | 1.89(1.00,2.79)    | 2.21(1.96,2.45)    | 1.94(1.63,2.26)    | 41  |
| Lesotho                          | 4,832(3,769-6,091)             | 157 | 5,123(4,175-6,222)             | 158 | -0.15(-0.33,0.02)  | -0.39(-0.49,-0.28) | 1.30(1.14,1.46)    | 0.22(0.13,0.32)    | 116 |
| Namibia                          | 5,942(4,641-7,543)             | 152 | 8,738(6,746-11,092)            | 148 | 2.17(1.85,2.48)    | 0.44(0.37,0.51)    | 1.66(1.51,1.81)    | 1.35(1.24,1.46)    | 57  |
| South Africa                     | 265,161(189,704-352,315)       | 28  | 302,856(216,857-402,989)       | 23  | 2.50(1.58,3.44)    | -6.54(-9.21,-3.78) | 8.11(6.84,9.39)    | 1.06(-0.01,2.16)   | 71  |
| Eswatini                         | 6,074(4,670-7,906)             | 150 | 7,142(5,569-8,859)             | 155 | 2.49(1.88,3.11)    | -0.37(-0.43,-0.30) | -0.37(-0.43,-0.30) | 0.51(0.32,0.71)    | 100 |
| Zimbabwe                         | 36,369(27,368-47,580)          | 98  | 51,492(40,122-65,729)          | 91  | 0.35(0.28,0.42)    | 0.70(0.56,0.83)    | 2.82(2.68,2.97)    | 1.24(1.16,1.32)    | 60  |
| Benin                            | 31,332(23,291-41,543)          | 103 | 72,418(52,917-96,381)          | 79  | 2.49(2.29,2.69)    | 2.79(2.73,2.85)    | 3.68(3.54,3.82)    | 2.95(2.86,3.04)    | 11  |
| Burkina Faso                     | 56,974(42,012-75,020)          | 75  | 131,075(95,954-177,974)        | 57  | 2.07(2.01,2.14)    | 3.07(2.90,3.24)    | 3.71(3.60,3.81)    | 2.92(2.85,2.98)    | 12  |

|                                       |                            |     |                                |     |                    |                    |                    |                    |     |
|---------------------------------------|----------------------------|-----|--------------------------------|-----|--------------------|--------------------|--------------------|--------------------|-----|
| Cameroon                              | 54,195(41,387-71,560)      | 77  | 140,046(102,838-188,093)       | 53  | 2.36(2.29,2.43)    | 4.18(4.08,4.28)    | 3.69(3.53,3.85)    | 3.37(3.30,3.43)    | 7   |
| Cabo Verde                            | 2,069(1,535-2,718)         | 171 | 2,413(1,853-3,146)             | 169 | 0.93(0.82,1.04)    | -0.19(-0.30,-0.08) | 1.03(0.89,1.18)    | 0.54(0.47,0.62)    | 96  |
| Chad                                  | 30,051(22,466-39,400)      | 105 | 85,256(61,631-116,071)         | 71  | 2.67(2.61,2.73)    | 3.96(3.85,4.07)    | 4.49(4.37,4.61)    | 3.67(3.62,3.73)    | 4   |
| Cote d'Ivoire                         | 78,070(58,852-104,186)     | 64  | 155,984(117,239-206,990)       | 49  | 3.24(2.85,3.64)    | 1.70(1.56,1.85)    | 2.38(2.06,2.70)    | 2.44(2.26,2.63)    | 21  |
| Gambia                                | 6,019(4,441-8,039)         | 151 | 12,141(9,052-15,846)           | 138 | 2.14(2.00,2.28)    | 2.41(2.37,2.46)    | 2.94(2.81,3.07)    | 2.46(2.40,2.53)    | 19  |
| Ghana                                 | 68,100(49,502-91,455)      | 70  | 131,817(98,899-172,299)        | 56  | 1.60(1.52,1.68)    | 2.47(2.38,2.56)    | 2.96(2.83,3.09)    | 2.34(2.28,2.40)    | 25  |
| Guinea                                | 43,848(33,516-58,527)      | 88  | 84,133(63,528-113,570)         | 72  | 2.88(2.70,3.07)    | 1.06(0.94,1.18)    | 2.94(2.73,3.15)    | 2.21(2.10,2.32)    | 28  |
| Guinea-Bissau                         | 6,749(5,164-8,734)         | 146 | 10,781(8,131-13,898)           | 142 | 1.37(1.25,1.48)    | 1.34(1.27,1.40)    | 2.24(2.14,2.34)    | 1.62(1.56,1.68)    | 50  |
| Liberia                               | 12,282(9,074-16,322)       | 139 | 23,331(17,080-31,164)          | 124 | 2.52(0.77,4.29)    | 2.04(1.91,2.17)    | 2.04(1.91,2.17)    | 2.19(1.64,2.74)    | 30  |
| Mali                                  | 39,006(29,773-51,662)      | 94  | 105,829(78,936-142,381)        | 65  | 1.93(1.17,2.69)    | 3.85(3.75,3.96)    | 4.82(4.39,5.25)    | 3.55(3.27,3.83)    | 5   |
| Mauritania                            | 17,786(13,300-23,725)      | 131 | 30,696(23,255-40,683)          | 113 | 1.97(1.92,2.02)    | 1.93(1.91,1.96)    | 1.81(1.77,1.85)    | 1.89(1.87,1.91)    | 42  |
| Niger                                 | 57,784(43,121-76,310)      | 74  | 145,970(106,775-198,158)       | 52  | 2.75(2.70,2.80)    | 3.25(3.15,3.35)    | 3.81(3.72,3.90)    | 3.24(3.19,3.29)    | 8   |
| Nigeria                               | 758,132(570,645-1,004,524) | 8   | 1,524,454(1,132,369-2,056,074) | 5   | 2.16(1.83,2.49)    | 3.18(2.86,3.50)    | 2.11(2.01,2.20)    | 2.39(2.24,2.55)    | 22  |
| Sao Tome and Principe                 | 1,082(832-1,390)           | 178 | 1,329(1,039-1,658)             | 177 | 1.50(1.18,1.83)    | -0.09(-0.17,0.00)  | 0.67(0.58,0.77)    | 0.67(0.56,0.78)    | 88  |
| Senegal                               | 39,404(29,838-52,202)      | 93  | 70,251(52,236-93,382)          | 81  | 1.34(1.18,1.50)    | 1.99(1.93,2.05)    | 2.85(2.71,2.98)    | 2.03(1.95,2.11)    | 38  |
| Sierra Leone                          | 23,486(17,886-30,941)      | 120 | 45,585(34,248-60,200)          | 95  | 0.83(0.60,1.07)    | 3.23(2.90,3.55)    | 2.79(2.55,3.03)    | 2.35(2.18,2.53)    | 24  |
| Togo                                  | 27,408(20,326-36,541)      | 111 | 50,610(37,927-66,537)          | 92  | 2.29(2.11,2.47)    | 1.71(1.54,1.87)    | 2.58(2.47,2.70)    | 2.15(2.06,2.25)    | 32  |
| American Samoa                        | 318(240-420)               | 192 | 314(235-407)                   | 193 | 0.03(-0.15,0.21)   | 0.03(-0.15,0.21)   | 0.63(-1.85,3.17)   | 0.22(-0.57,1.00)   | 115 |
| Bermuda                               | 430(339-542)               | 190 | 349(275-430)                   | 192 | 0.01(-0.09,0.11)   | -0.48(-0.69,-0.27) | -1.57(-2.02,-1.11) | -0.66(-0.82,-0.49) | 158 |
| Cook Islands                          | 131(100-174)               | 197 | 98(72-125)                     | 199 | -2.50(-2.88,-2.13) | -0.48(-0.67,-0.29) | 0.31(-0.12,0.74)   | -0.90(-1.12,-0.68) | 171 |
| Greenland                             | 707(563-882)               | 186 | 513(428-625)                   | 189 | 0.25(-0.46,0.97)   | -2.43(-2.62,-2.24) | -1.08(-1.17,-0.98) | -1.17(-1.41,-0.94) | 183 |
| Guam                                  | 893(675-1,176)             | 183 | 940(704-1,224)                 | 180 | 0.82(0.56,1.08)    | -1.26(-1.62,-0.90) | 1.37(0.87,1.87)    | 0.30(0.06,0.53)    | 114 |
| Monaco                                | 111(92-134)                | 198 | 136(111-164)                   | 197 | 0.69(0.66,0.72)    | 0.72(0.66,0.79)    | 0.77(0.72,0.82)    | 0.72(0.69,0.75)    | 86  |
| Nauru                                 | 68(52-88)                  | 201 | 63(47-84)                      | 202 | -1.21(-1.29,-1.13) | -1.21(-1.29,-1.13) | 2.28(0.65,3.94)    | -0.14(-0.64,0.37)  | 132 |
| Niue                                  | 15(11-20)                  | 203 | 9(7-12)                        | 203 | -4.84(-5.68,-4.00) | -2.01(-2.32,-1.71) | 2.24(1.54,2.95)    | -1.60(-1.99,-1.20) | 191 |
| Northern Mariana Islands              | 276(214-354)               | 195 | 200(151-254)                   | 196 | 2.02(1.66,2.38)    | -2.46(-2.64,-2.29) | -2.88(-3.25,-2.51) | -1.01(-1.21,-0.81) | 177 |
| Palau                                 | 98(77-122)                 | 200 | 82(66-100)                     | 200 | 0.91(0.70,1.12)    | -1.91(-2.10,-1.71) | -0.32(-0.69,0.04)  | -0.48(-0.64,-0.31) | 150 |
| Puerto Rico                           | 45,637(35,711-56,881)      | 86  | 26,855(21,738-33,087)          | 119 | 0.07(-0.11,0.25)   | -1.96(-2.19,-1.72) | -3.50(-3.64,-3.35) | -1.79(-1.93,-1.66) | 196 |
| Saint Kitts and Nevis                 | 428(325-552)               | 191 | 419(325-538)                   | 190 | 0.10(0.05,0.15)    | 0.10(0.05,0.15)    | -0.12(-0.80,0.56)  | 0.00(-0.22,0.22)   | 121 |
| San Marino                            | 99(80-122)                 | 199 | 125(100-153)                   | 198 | 0.92(0.82,1.02)    | 0.97(0.94,1.00)    | 0.59(0.55,0.63)    | 0.83(0.79,0.87)    | 79  |
| Tokelau                               | 12(8-16)                   | 204 | 9(7-12)                        | 204 | -3.14(-4.65,-1.60) | -2.73(-3.42,-2.05) | 2.99(2.44,3.54)    | -0.95(-1.52,-0.38) | 175 |
| Tuvalu                                | 53(42-66)                  | 202 | 66(49-85)                      | 201 | -1.22(-1.43,-1.01) | -0.22(-0.30,-0.14) | 4.28(3.34,5.22)    | 0.84(0.55,1.13)    | 78  |
| United States Virgin Islands          | 895(693-1,168)             | 182 | 684(537-863)                   | 184 | -0.49(-0.54,-0.43) | -1.30(-1.33,-1.28) | -0.87(-1.07,-0.67) | -0.91(-0.98,-0.85) | 172 |
| South Sudan                           | 55,084(42,534-71,416)      | 76  | 75,804(57,146-98,742)          | 76  | 1.34(1.11,1.58)    | 1.79(1.74,1.85)    | 0.04(-0.60,0.67)   | 1.11(0.89,1.32)    | 67  |
| Sudan                                 | 155,407(114,968-203,710)   | 39  | 284,502(217,381-375,039)       | 26  | 2.97(2.84,3.09)    | 1.39(1.24,1.54)    | 2.10(1.93,2.28)    | 2.09(2.00,2.18)    | 36  |
| <b>Inflammatory bowel disease</b>     |                            |     |                                |     |                    |                    |                    |                    |     |
| China                                 | 17,221(14,326-20,399)      | 2   | 51,462(43,933-60,474)          | 2   | 5.64(5.22,6.05)    | 3.22(3.10,3.34)    | 2.76(2.61,2.90)    | 3.82(3.68,3.96)    | 30  |
| Democratic People's Republic of Korea | 197(164-236)               | 75  | 387(326-463)                   | 75  | 3.36(2.76,3.96)    | 1.95(1.92,1.98)    | 1.95(1.92,1.98)    | 2.38(2.20,2.57)    | 116 |

|                                  |                    |     |                    |     |                    |                    |                    |                    |     |
|----------------------------------|--------------------|-----|--------------------|-----|--------------------|--------------------|--------------------|--------------------|-----|
| Taiwan (Province of China)       | 149(129-171)       | 85  | 470(420-526)       | 69  | 2.30(1.67,2.94)    | 7.86(6.32,9.43)    | 2.87(2.57,3.16)    | 4.19(3.67,4.73)    | 22  |
| Cambodia                         | 30(23-37)          | 138 | 79(64-96)          | 134 | 3.44(3.38,3.49)    | 3.82(3.57,4.07)    | 2.84(2.75,2.93)    | 3.38(3.29,3.46)    | 63  |
| Indonesia                        | 681(551-828)       | 39  | 1,504(1,248-1,808) | 31  | 3.91(3.60,4.23)    | 2.34(2.28,2.39)    | 2.16(1.99,2.32)    | 2.77(2.65,2.88)    | 91  |
| Lao People's Democratic Republic | 12(10-15)          | 156 | 35(29-43)          | 151 | 3.66(3.60,3.72)    | 3.46(3.44,3.47)    | 3.70(3.64,3.77)    | 3.61(3.58,3.64)    | 42  |
| Malaysia                         | 72(61-83)          | 110 | 251(223-283)       | 96  | 6.80(6.70,6.90)    | 3.31(3.29,3.33)    | 3.04(2.99,3.10)    | 4.39(4.34,4.44)    | 15  |
| Maldives                         | 1(0-1)             | 190 | 3(2-3)             | 183 | 5.52(5.41,5.62)    | 4.70(4.61,4.79)    | 6.66(6.47,6.85)    | 5.63(5.55,5.71)    | 5   |
| Myanmar                          | 141(113-173)       | 86  | 306(253-378)       | 84  | 2.52(2.48,2.56)    | 2.69(2.65,2.72)    | 2.90(2.81,2.99)    | 2.70(2.67,2.73)    | 93  |
| Philippines                      | 242(197-292)       | 65  | 657(541-799)       | 56  | 4.36(4.26,4.47)    | 2.56(2.46,2.66)    | 3.69(3.37,4.01)    | 3.53(3.42,3.64)    | 49  |
| Sri Lanka                        | 107(88-131)        | 94  | 268(239-301)       | 90  | 5.83(5.59,6.07)    | 1.95(1.89,2.01)    | 2.31(2.24,2.37)    | 3.25(3.17,3.33)    | 74  |
| Thailand                         | 183(142-230)       | 80  | 373(309-455)       | 77  | 3.50(3.28,3.73)    | 1.97(1.89,2.04)    | 1.97(1.89,2.04)    | 2.49(2.41,2.58)    | 109 |
| Timor-Leste                      | 2(2-3)             | 178 | 6(5-7)             | 175 | 1.82(1.69,1.96)    | 4.27(4.22,4.31)    | 3.78(3.69,3.88)    | 3.26(3.20,3.32)    | 72  |
| Viet Nam                         | 402(316-499)       | 50  | 1,482(1,201-1,836) | 33  | 8.84(8.38,9.30)    | 2.96(2.59,3.33)    | 2.37(2.31,2.43)    | 4.61(4.39,4.84)    | 10  |
| Fiji                             | 3(3-4)             | 170 | 6(5-8)             | 173 | 2.10(2.08,2.12)    | 2.59(2.54,2.63)    | 1.93(1.84,2.01)    | 2.23(2.20,2.27)    | 123 |
| Kiribati                         | 0(0-0)             | 195 | 1(0-1)             | 194 | 1.99(1.85,2.12)    | 2.98(2.73,3.23)    | 2.60(2.51,2.69)    | 2.52(2.42,2.61)    | 105 |
| Marshall Islands                 | 0(0-0)             | 198 | 0(0-0)             | 198 | 3.00(2.92,3.09)    | 2.80(2.71,2.88)    | 2.66(2.59,2.73)    | 2.83(2.78,2.89)    | 89  |
| Micronesia (Federated States of) | 0(0-0)             | 192 | 1(1-1)             | 193 | 1.85(1.74,1.97)    | 1.87(1.78,1.95)    | 1.65(1.57,1.73)    | 1.80(1.74,1.86)    | 145 |
| Papua New Guinea                 | 13(11-16)          | 152 | 43(36-53)          | 148 | 3.49(3.40,3.57)    | 4.43(4.35,4.51)    | 4.62(4.52,4.72)    | 4.20(4.15,4.26)    | 21  |
| Samoa                            | 1(0-1)             | 189 | 1(1-1)             | 191 | 0.59(0.41,0.76)    | 2.31(1.70,2.92)    | 3.46(3.07,3.85)    | 2.14(1.89,2.39)    | 129 |
| Solomon Islands                  | 1(1-1)             | 185 | 3(2-4)             | 182 | 3.98(3.93,4.02)    | 3.45(3.37,3.54)    | 3.39(3.35,3.43)    | 3.62(3.58,3.66)    | 41  |
| Tonga                            | 0(0-0)             | 193 | 1(0-1)             | 195 | 1.70(1.59,1.81)    | 2.21(2.07,2.36)    | 1.55(1.47,1.63)    | 1.89(1.81,1.96)    | 143 |
| Vanuatu                          | 1(0-1)             | 191 | 1(1-2)             | 189 | 3.30(3.19,3.41)    | 4.08(4.00,4.17)    | 3.55(3.47,3.62)    | 3.68(3.62,3.74)    | 38  |
| Armenia                          | 178(150-209)       | 81  | 237(200-283)       | 99  | 1.38(1.34,1.42)    | 1.14(1.07,1.21)    | 0.38(0.20,0.56)    | 0.98(0.92,1.05)    | 173 |
| Azerbaijan                       | 432(365-510)       | 49  | 805(677-965)       | 50  | 1.81(1.73,1.89)    | 2.72(2.66,2.77)    | 2.00(1.80,2.20)    | 2.18(2.11,2.25)    | 128 |
| Georgia                          | 381(325-449)       | 51  | 275(234-327)       | 89  | -1.11(-1.45,-0.78) | -1.29(-1.35,-1.24) | -0.96(-1.29,-0.64) | -1.13(-1.28,-0.99) | 202 |
| Kazakhstan                       | 922(782-1,089)     | 30  | 1,389(1,185-1,660) | 35  | 0.50(0.39,0.61)    | 0.70(0.60,0.80)    | 3.10(2.83,3.37)    | 1.37(1.28,1.47)    | 162 |
| Kyrgyzstan                       | 222(189-260)       | 73  | 390(329-460)       | 74  | 2.10(1.89,2.31)    | 1.85(1.82,1.89)    | 1.85(1.82,1.89)    | 1.93(1.86,2.00)    | 141 |
| Mongolia                         | 98(82-116)         | 97  | 251(210-300)       | 97  | 2.93(2.85,3.01)    | 3.87(3.73,4.01)    | 2.99(2.86,3.12)    | 3.26(3.19,3.34)    | 73  |
| Tajikistan                       | 225(190-267)       | 72  | 518(439-612)       | 67  | 1.65(1.25,2.04)    | 3.68(3.20,4.16)    | 3.43(3.33,3.52)    | 2.87(2.67,3.08)    | 87  |
| Turkmenistan                     | 188(157-222)       | 79  | 383(324-451)       | 76  | 2.15(2.08,2.22)    | 3.15(2.83,3.47)    | 2.22(2.08,2.36)    | 2.47(2.36,2.59)    | 110 |
| Uzbekistan                       | 868(732-1,030)     | 33  | 2,213(1,878-2,642) | 25  | 3.01(2.69,3.33)    | 3.63(3.47,3.78)    | 3.24(3.14,3.35)    | 3.33(3.18,3.48)    | 66  |
| Albania                          | 246(208-289)       | 64  | 291(249-341)       | 85  | 1.04(0.83,1.24)    | 1.02(0.80,1.23)    | -0.02(-0.13,0.09)  | 0.56(0.40,0.72)    | 186 |
| Bosnia and Herzegovina           | 345(301-395)       | 55  | 365(325-417)       | 78  | 0.26(-0.03,0.55)   | 0.88(0.73,1.02)    | -0.84(-0.90,-0.79) | 0.14(0.03,0.25)    | 193 |
| Bulgaria                         | 742(626-865)       | 38  | 851(729-996)       | 48  | 2.75(2.69,2.80)    | -0.32(-0.48,-0.16) | -0.78(-0.82,-0.74) | 0.48(0.41,0.55)    | 187 |
| Croatia                          | 527(493-562)       | 46  | 591(544-645)       | 64  | 0.03(-0.09,0.15)   | 0.50(0.46,0.54)    | 0.65(0.39,0.90)    | 0.40(0.31,0.49)    | 189 |
| Czechia                          | 543(463-656)       | 45  | 1,041(974-1,115)   | 44  | 2.67(2.41,2.94)    | 1.33(1.26,1.40)    | 2.80(2.24,3.37)    | 2.20(2.00,2.40)    | 126 |
| Hungary                          | 1,316(1,216-1,407) | 28  | 2,268(2,160-2,384) | 24  | 3.44(3.10,3.78)    | 2.00(1.81,2.19)    | 0.26(0.15,0.37)    | 1.93(1.79,2.07)    | 138 |
| North Macedonia                  | 194(165-227)       | 76  | 253(216-297)       | 95  | 1.32(1.20,1.45)    | 1.32(1.20,1.45)    | 0.26(-0.17,0.69)   | 0.99(0.83,1.15)    | 172 |
| Montenegro                       | 59(50-69)          | 118 | 67(57-79)          | 139 | -0.13(-0.33,0.06)  | 1.09(0.97,1.22)    | 0.42(0.35,0.50)    | 0.45(0.37,0.53)    | 188 |

|                     |                       |     |                       |     |                    |                    |                    |                    |     |
|---------------------|-----------------------|-----|-----------------------|-----|--------------------|--------------------|--------------------|--------------------|-----|
| Poland              | 14,031(11,891-16,418) | 5   | 5,805(5,141-6,573)    | 14  | -5.05(-5.51,-4.60) | -2.46(-2.91,-2.01) | -0.50(-0.58,-0.41) | -3.03(-3.26,-2.80) | 204 |
| Romania             | 1,287(1,095-1,512)    | 29  | 1,187(1,085-1,305)    | 38  | -1.92(-2.20,-1.65) | 0.32(0.25,0.39)    | 0.63(0.35,0.91)    | -0.28(-0.41,-0.15) | 200 |
| Serbia              | 909(776-1,060)        | 31  | 1,244(1,069-1,448)    | 37  | 3.37(2.96,3.79)    | 0.01(-0.09,0.11)   | -0.21(-0.30,-0.12) | 0.99(0.84,1.15)    | 171 |
| Slovakia            | 566(501-637)          | 44  | 569(509-646)          | 65  | 0.77(0.54,0.99)    | 0.03(-0.08,0.14)   | -0.62(-0.84,-0.39) | 0.05(-0.07,0.17)   | 195 |
| Slovenia            | 231(202-270)          | 71  | 277(245-316)          | 88  | 1.40(1.34,1.45)    | 0.71(0.68,0.74)    | -0.26(-0.28,-0.23) | 0.63(0.60,0.65)    | 185 |
| Belarus             | 511(436-608)          | 48  | 649(552-774)          | 59  | 1.43(1.27,1.58)    | 0.19(0.07,0.30)    | 0.86(0.44,1.29)    | 0.78(0.63,0.93)    | 179 |
| Estonia             | 62(55-70)             | 113 | 105(94-118)           | 126 | 2.54(2.19,2.88)    | 1.05(0.98,1.12)    | 2.04(1.35,2.73)    | 1.82(1.57,2.06)    | 144 |
| Latvia              | 161(139-187)          | 83  | 154(135-179)          | 111 | 1.86(1.65,2.08)    | -0.81(-0.91,-0.71) | -1.40(-1.56,-1.23) | -0.16(-0.26,-0.06) | 199 |
| Lithuania           | 233(204-267)          | 70  | 258(245-271)          | 94  | 1.19(1.09,1.29)    | 0.01(-0.07,0.08)   | -0.18(-0.20,-0.17) | 0.37(0.32,0.41)    | 190 |
| Republic of Moldova | 201(169-242)          | 74  | 194(179-210)          | 105 | -1.81(-1.95,-1.66) | 0.71(0.69,0.73)    | 0.58(0.52,0.63)    | -0.12(-0.17,-0.07) | 198 |
| Russian Federation  | 13,522(11,622-15,867) | 6   | 14,514(12,473-17,148) | 7   | 1.08(0.84,1.33)    | -0.07(-0.23,0.09)  | -0.28(-0.32,-0.25) | 0.23(0.13,0.33)    | 191 |
| Ukraine             | 3,459(2,935-4,104)    | 14  | 3,626(3,093-4,258)    | 20  | 0.57(0.49,0.66)    | 0.03(-0.04,0.10)   | -0.08(-0.27,0.11)  | 0.16(0.09,0.23)    | 192 |
| Brunei Darussalam   | 13(10-15)             | 155 | 26(21-31)             | 155 | 3.03(2.97,3.09)    | 2.42(2.33,2.50)    | 1.92(1.86,1.98)    | 2.45(2.41,2.50)    | 111 |
| Japan               | 16,383(13,833-19,567) | 3   | 22,436(19,353-25,906) | 4   | 3.72(2.95,4.49)    | 0.06(-0.03,0.15)   | -0.32(-0.66,0.01)  | 1.06(0.80,1.32)    | 169 |
| Republic of Korea   | 1,587(1,390-1,777)    | 22  | 4,407(4,220-4,589)    | 16  | 6.94(5.90,7.98)    | 2.03(1.99,2.07)    | 2.03(1.99,2.07)    | 3.53(3.22,3.85)    | 48  |
| Singapore           | 123(101-147)          | 90  | 215(178-264)          | 101 | 2.12(1.68,2.56)    | 2.70(2.29,3.11)    | 0.93(0.57,1.29)    | 1.94(1.68,2.20)    | 137 |
| Australia           | 2,213(1,884-2,621)    | 17  | 5,354(4,766-6,020)    | 15  | 5.51(5.12,5.90)    | 1.95(1.90,2.00)    | 2.09(2.02,2.15)    | 3.09(2.97,3.21)    | 78  |
| New Zealand         | 766(663-876)          | 37  | 1,092(974-1,230)      | 43  | 1.50(1.40,1.60)    | 1.43(1.41,1.44)    | 0.78(0.69,0.86)    | 1.23(1.18,1.27)    | 164 |
| Andorra             | 5(5-6)                | 166 | 9(8-11)               | 170 | 3.75(2.14,5.38)    | 2.68(2.38,2.97)    | -0.10(-1.47,1.30)  | 1.90(1.16,2.65)    | 142 |
| Austria             | 1,618(1,446-1,789)    | 21  | 1,940(1,749-2,182)    | 27  | 0.73(0.62,0.83)    | 1.38(1.11,1.64)    | -0.25(-1.06,0.58)  | 0.66(0.39,0.94)    | 183 |
| Belgium             | 829(787-875)          | 35  | 1,651(1,451-1,918)    | 30  | 1.19(0.95,1.42)    | 0.89(0.83,0.95)    | 5.58(4.78,6.38)    | 2.42(2.16,2.67)    | 114 |
| Cyprus              | 32(28-38)             | 135 | 91(83-101)            | 132 | 5.56(5.40,5.72)    | 3.44(3.39,3.49)    | 1.94(1.84,2.04)    | 3.63(3.57,3.70)    | 40  |
| Denmark             | 1,373(1,281-1,472)    | 24  | 1,334(1,247-1,419)    | 36  | -1.33(-1.42,-1.25) | 0.69(0.67,0.70)    | 0.34(0.23,0.44)    | -0.08(-0.12,-0.04) | 197 |
| Finland             | 790(760-819)          | 36  | 1,500(1,345-1,652)    | 32  | 0.84(0.78,0.89)    | 1.70(1.60,1.81)    | 4.33(3.92,4.74)    | 2.22(2.09,2.35)    | 124 |
| France              | 6,784(6,568-6,990)    | 12  | 8,431(7,970-8,812)    | 11  | 0.83(0.81,0.85)    | 0.83(0.81,0.85)    | 0.66(0.14,1.18)    | 0.78(0.61,0.94)    | 180 |
| Germany             | 9,760(8,592-11,204)   | 10  | 16,746(14,805-18,956) | 5   | 4.20(3.59,4.82)    | 0.39(0.24,0.54)    | 1.54(1.32,1.75)    | 1.94(1.73,2.16)    | 135 |
| Greece              | 908(785-1,045)        | 32  | 911(849-975)          | 47  | 1.07(0.77,1.38)    | -0.52(-0.87,-0.18) | -0.55(-0.63,-0.47) | 0.01(-0.14,0.15)   | 196 |
| Iceland             | 30(25-34)             | 139 | 65(56-73)             | 141 | 5.12(4.88,5.36)    | 2.11(2.04,2.19)    | 1.08(0.80,1.37)    | 2.65(2.51,2.78)    | 97  |
| Ireland             | 351(298-411)          | 54  | 437(382-504)          | 71  | 0.90(0.70,1.11)    | -0.08(-0.44,0.29)  | 1.42(1.36,1.47)    | 0.81(0.67,0.95)    | 178 |
| Israel              | 298(258-342)          | 60  | 652(599-721)          | 58  | 4.59(4.40,4.79)    | 1.11(0.99,1.23)    | 2.31(2.25,2.37)    | 2.76(2.68,2.84)    | 92  |
| Italy               | 12,109(10,641-13,753) | 8   | 12,194(10,759-13,882) | 10  | -0.87(-1.10,-0.63) | 1.83(1.56,2.09)    | -0.90(-1.10,-0.70) | 0.13(-0.02,0.27)   | 194 |
| Luxembourg          | 84(73-97)             | 102 | 111(98-128)           | 125 | -0.57(-0.68,-0.46) | 1.13(0.88,1.38)    | 2.31(1.90,2.72)    | 0.96(0.80,1.12)    | 175 |
| Malta               | 32(27-37)             | 137 | 44(38-51)             | 147 | 2.00(1.89,2.10)    | 1.01(0.96,1.06)    | 0.39(0.29,0.49)    | 1.13(1.08,1.19)    | 168 |
| Netherlands         | 2,180(2,070-2,291)    | 18  | 1,460(1,269-1,692)    | 34  | 1.02(0.97,1.08)    | -0.14(-0.29,0.01)  | -5.30(-6.10,-4.50) | -1.43(-1.70,-1.16) | 203 |
| Norway              | 1,362(1,163-1,594)    | 25  | 2,113(1,834-2,432)    | 26  | 1.51(1.26,1.77)    | 1.97(1.77,2.18)    | 1.05(0.92,1.19)    | 1.56(1.44,1.68)    | 155 |
| Portugal            | 607(533-697)          | 41  | 1,112(1,025-1,208)    | 41  | 5.04(4.70,5.38)    | 1.23(1.15,1.30)    | 0.14(-0.10,0.38)   | 2.10(1.96,2.24)    | 131 |
| Spain               | 4,177(4,025-4,320)    | 13  | 6,798(6,558-7,062)    | 12  | 2.71(2.62,2.81)    | 2.06(2.04,2.09)    | 0.41(0.30,0.52)    | 1.66(1.62,1.71)    | 149 |
| Sweden              | 2,296(2,012-2,617)    | 16  | 3,173(2,814-3,640)    | 22  | 0.78(0.58,0.97)    | 1.37(1.29,1.45)    | 1.23(1.02,1.44)    | 1.15(1.04,1.25)    | 167 |

|                                    |                        |     |                       |     |                    |                    |                    |                    |     |
|------------------------------------|------------------------|-----|-----------------------|-----|--------------------|--------------------|--------------------|--------------------|-----|
| Switzerland                        | 853(755-975)           | 34  | 1,108(993-1,265)      | 42  | 1.45(1.38,1.51)    | 0.67(0.61,0.73)    | 0.68(0.65,0.72)    | 0.91(0.87,0.94)    | 176 |
| United Kingdom                     | 12,548(11,094-14,290)  | 7   | 16,688(14,854-19,052) | 6   | 1.05(0.91,1.19)    | 1.23(1.20,1.26)    | 0.61(0.53,0.68)    | 0.98(0.93,1.03)    | 174 |
| Argentina                          | 524(437-621)           | 47  | 831(695-986)          | 49  | 1.56(1.51,1.60)    | 1.50(1.48,1.52)    | 1.72(1.66,1.77)    | 1.59(1.56,1.62)    | 152 |
| Chile                              | 314(267-361)           | 58  | 485(420-562)          | 68  | 3.47(3.17,3.76)    | 1.92(1.86,1.98)    | -0.70(-1.03,-0.37) | 1.53(1.39,1.68)    | 158 |
| Uruguay                            | 41(35-49)              | 128 | 66(55-78)             | 140 | 2.44(2.27,2.61)    | 1.14(1.09,1.18)    | 1.29(0.89,1.69)    | 1.59(1.45,1.72)    | 150 |
| Canada                             | 11,089(10,767-11,409)  | 9   | 14,206(13,697-14,688) | 8   | 1.15(1.08,1.23)    | 1.85(1.83,1.88)    | -0.57(-0.71,-0.42) | 0.88(0.83,0.93)    | 177 |
| United States of America           | 96,513(83,182-112,507) | 1   | 85,388(77,956-94,653) | 1   | -4.46(-4.98,-3.95) | 1.69(1.57,1.81)    | 1.13(1.04,1.21)    | -0.45(-0.62,-0.27) | 201 |
| Antigua and Barbuda                | 1(1-1)                 | 184 | 3(2-3)                | 184 | 4.49(4.35,4.63)    | 1.39(1.33,1.45)    | 2.77(2.70,2.84)    | 2.92(2.87,2.98)    | 83  |
| Bahamas                            | 5(4-6)                 | 167 | 14(11-17)             | 166 | 4.17(4.06,4.28)    | 2.27(1.98,2.57)    | 3.89(3.75,4.02)    | 3.45(3.33,3.57)    | 55  |
| Barbados                           | 11(9-13)               | 159 | 18(15-22)             | 160 | 2.45(2.24,2.65)    | 0.07(-0.06,0.20)   | 2.44(2.34,2.53)    | 1.71(1.62,1.80)    | 148 |
| Belize                             | 3(2-3)                 | 173 | 10(9-13)              | 169 | 5.01(4.76,5.25)    | 3.76(3.66,3.87)    | 5.00(4.91,5.09)    | 4.57(4.49,4.66)    | 11  |
| Cuba                               | 235(199-285)           | 69  | 359(302-430)          | 79  | 2.77(2.63,2.91)    | -0.17(-0.35,0.01)  | 2.08(1.89,2.26)    | 1.52(1.42,1.62)    | 159 |
| Dominica                           | 1(1-2)                 | 183 | 2(2-3)                | 186 | 3.51(3.40,3.61)    | 0.92(0.71,1.14)    | 1.55(1.44,1.65)    | 1.93(1.83,2.02)    | 139 |
| Dominican Republic                 | 117(96-139)            | 92  | 289(241-349)          | 86  | 4.09(3.98,4.21)    | 1.97(1.92,2.02)    | 3.42(3.35,3.48)    | 3.16(3.11,3.21)    | 77  |
| Grenada                            | 2(1-2)                 | 181 | 3(3-4)                | 181 | 4.78(4.36,5.21)    | 1.45(1.25,1.65)    | 1.87(1.64,2.10)    | 2.70(2.53,2.88)    | 94  |
| Guyana                             | 14(12-17)              | 150 | 22(18-26)             | 158 | 2.14(1.89,2.39)    | -0.31(-0.42,-0.20) | 2.63(2.50,2.75)    | 1.45(1.35,1.55)    | 160 |
| Haiti                              | 96(80-116)             | 99  | 263(218-324)          | 93  | 4.20(4.05,4.36)    | 2.34(2.28,2.40)    | 4.16(4.08,4.24)    | 3.57(3.50,3.63)    | 45  |
| Jamaica                            | 38(32-46)              | 130 | 76(64-90)             | 136 | 3.12(2.69,3.55)    | 1.01(0.78,1.24)    | 3.31(3.04,3.57)    | 2.44(2.24,2.63)    | 112 |
| Saint Lucia                        | 2(2-3)                 | 175 | 5(5-7)                | 176 | 3.77(3.59,3.94)    | 1.44(0.83,2.05)    | 3.37(3.13,3.61)    | 2.81(2.58,3.03)    | 90  |
| Saint Vincent and the Grenadines   | 2(2-2)                 | 180 | 4(3-4)                | 179 | 3.76(3.65,3.87)    | 0.49(0.44,0.55)    | 2.44(2.39,2.50)    | 2.19(2.15,2.24)    | 127 |
| Suriname                           | 8(6-9)                 | 161 | 17(14-20)             | 161 | 3.38(3.14,3.62)    | 2.23(2.06,2.40)    | 2.89(2.74,3.04)    | 2.84(2.73,2.96)    | 88  |
| Trinidad and Tobago                | 27(23-33)              | 141 | 52(44-64)             | 146 | 4.20(4.14,4.26)    | 0.58(0.47,0.70)    | 2.43(2.37,2.49)    | 2.27(2.22,2.32)    | 119 |
| Bolivia (Plurinational State of)   | 79(67-93)              | 106 | 197(167-237)          | 103 | 4.37(4.25,4.49)    | 1.52(1.36,1.68)    | 4.06(3.61,4.50)    | 3.27(3.11,3.42)    | 71  |
| Ecuador                            | 120(105-136)           | 91  | 323(285-363)          | 82  | 6.24(6.13,6.36)    | 0.18(0.06,0.29)    | 4.07(3.74,4.40)    | 3.44(3.33,3.56)    | 56  |
| Peru                               | 274(228-325)           | 61  | 608(514-723)          | 62  | 3.56(3.13,3.99)    | 0.56(0.35,0.76)    | 4.53(4.31,4.76)    | 2.87(2.69,3.04)    | 86  |
| Colombia                           | 598(505-707)           | 42  | 1,129(960-1,327)      | 39  | 2.61(2.36,2.86)    | 0.93(0.79,1.06)    | 3.36(3.22,3.50)    | 2.26(2.16,2.37)    | 120 |
| Costa Rica                         | 63(53-74)              | 112 | 120(103-141)          | 124 | 3.23(3.02,3.43)    | 0.93(0.81,1.05)    | 2.46(2.37,2.54)    | 2.26(2.17,2.34)    | 121 |
| El Salvador                        | 101(85-120)            | 96  | 148(126-173)          | 112 | 1.87(1.68,2.05)    | 0.28(0.20,0.36)    | 1.82(1.73,1.92)    | 1.36(1.28,1.44)    | 163 |
| Guatemala                          | 130(110-154)           | 87  | 358(302-422)          | 80  | 3.59(3.40,3.79)    | 2.57(2.45,2.69)    | 4.38(4.29,4.47)    | 3.58(3.50,3.66)    | 44  |
| Honduras                           | 73(61-86)              | 109 | 182(153-215)          | 108 | 3.38(3.16,3.60)    | 2.04(1.90,2.17)    | 4.07(3.97,4.17)    | 3.24(3.14,3.33)    | 75  |
| Mexico                             | 2,540(2,184-2,963)     | 15  | 3,944(3,432-4,538)    | 17  | 1.08(0.72,1.43)    | 0.90(0.69,1.11)    | 2.68(2.54,2.83)    | 1.59(1.44,1.73)    | 153 |
| Nicaragua                          | 60(50-72)              | 116 | 124(106-147)          | 120 | 3.03(2.70,3.35)    | 2.05(1.68,2.41)    | 2.32(2.24,2.39)    | 2.51(2.35,2.67)    | 108 |
| Panama                             | 50(43-58)              | 124 | 92(79-108)            | 131 | 2.53(2.33,2.73)    | 0.73(0.06,1.40)    | 3.41(3.02,3.80)    | 2.22(1.95,2.49)    | 125 |
| Venezuela (Bolivarian Republic of) | 352(305-401)           | 53  | 655(555-767)          | 57  | 3.24(2.97,3.51)    | 0.67(0.04,1.29)    | 1.94(1.46,2.43)    | 2.01(1.73,2.29)    | 132 |
| Brazil                             | 7,717(6,763-8,849)     | 11  | 12,705(11,142-14,618) | 9   | 1.94(1.80,2.08)    | 1.82(1.23,2.41)    | 1.42(1.27,1.58)    | 1.72(1.53,1.92)    | 147 |
| Paraguay                           | 109(95-126)            | 93  | 222(190-261)          | 100 | 5.77(5.59,5.96)    | -0.53(-1.31,0.26)  | 2.21(2.01,2.41)    | 2.55(2.29,2.82)    | 103 |
| Algeria                            | 577(508-648)           | 43  | 1,657(1,373-2,043)    | 29  | 5.12(5.07,5.17)    | 2.95(2.75,3.15)    | 2.84(2.75,2.94)    | 3.68(3.61,3.76)    | 37  |
| Bahrain                            | 13(11-15)              | 151 | 58(48-72)             | 144 | 3.95(3.58,4.32)    | 7.99(7.72,8.25)    | 3.35(3.06,3.64)    | 5.19(5.00,5.38)    | 6   |

|                                  |                       |     |                       |     |                 |                    |                   |                 |     |
|----------------------------------|-----------------------|-----|-----------------------|-----|-----------------|--------------------|-------------------|-----------------|-----|
| Egypt                            | 1,624(1,415-1,814)    | 20  | 3,833(3,168-4,689)    | 19  | 4.23(4.02,4.43) | 1.26(1.03,1.49)    | 3.25(3.17,3.34)   | 2.95(2.85,3.06) | 81  |
| Iran (Islamic Republic of)       | 1,347(1,111-1,654)    | 27  | 3,167(2,599-3,894)    | 23  | 4.02(3.76,4.29) | 2.84(2.59,3.10)    | 2.04(1.97,2.11)   | 3.05(2.92,3.18) | 79  |
| Iraq                             | 240(202-282)          | 68  | 984(810-1,191)        | 45  | 5.09(4.94,5.23) | 4.71(4.17,5.24)    | 4.62(4.31,4.93)   | 4.88(4.66,5.10) | 8   |
| Jordan                           | 130(114-147)          | 88  | 779(649-917)          | 51  | 6.29(6.03,6.55) | 6.14(5.65,6.63)    | 6.81(6.30,7.32)   | 6.36(6.08,6.63) | 3   |
| Kuwait                           | 61(57-66)             | 114 | 195(161-239)          | 104 | 1.46(0.90,2.02) | 5.69(5.06,6.32)    | 4.79(4.01,5.58)   | 4.10(3.72,4.48) | 26  |
| Lebanon                          | 65(54-80)             | 111 | 194(161-238)          | 106 | 4.24(3.77,4.72) | 3.66(3.55,3.77)    | 3.57(2.61,4.53)   | 3.81(3.48,4.15) | 31  |
| Libya                            | 51(42-62)             | 122 | 178(146-220)          | 109 | 6.09(5.91,6.27) | 2.84(2.38,3.30)    | 4.73(3.86,5.59)   | 4.45(4.12,4.78) | 13  |
| Morocco                          | 300(252-354)          | 59  | 599(508-712)          | 63  | 2.76(2.64,2.87) | 2.01(1.90,2.12)    | 2.45(2.42,2.48)   | 2.41(2.36,2.46) | 115 |
| Palestine                        | 29(24-35)             | 140 | 122(101-145)          | 122 | 7.26(7.11,7.40) | 3.97(3.66,4.29)    | 4.00(3.82,4.19)   | 5.14(5.01,5.27) | 7   |
| Oman                             | 38(31-46)             | 129 | 143(115-173)          | 116 | 3.96(3.07,4.86) | 2.60(1.98,3.22)    | 6.83(5.52,8.16)   | 4.64(3.99,5.28) | 9   |
| Qatar                            | 13(10-16)             | 153 | 125(102-152)          | 119 | 4.11(3.89,4.33) | 13.79(13.07,14.50) | 6.51(6.23,6.78)   | 8.24(7.99,8.49) | 1   |
| Saudi Arabia                     | 341(287-404)          | 56  | 1,122(929-1,353)      | 40  | 4.84(4.64,5.03) | 3.38(3.29,3.47)    | 4.24(3.83,4.66)   | 4.17(4.02,4.33) | 24  |
| Syrian Arab Republic             | 241(200-289)          | 67  | 449(376-544)          | 70  | 4.08(3.72,4.44) | 2.93(2.80,3.06)    | -0.24(-0.68,0.19) | 2.14(1.94,2.35) | 130 |
| Tunisia                          | 168(139-202)          | 82  | 349(288-426)          | 81  | 3.39(3.32,3.45) | 2.61(2.43,2.79)    | 1.55(1.48,1.63)   | 2.56(2.49,2.63) | 102 |
| Turkey                           | 2,084(1,859-2,316)    | 19  | 5,961(5,119-6,893)    | 13  | 5.14(4.83,5.44) | 1.75(1.42,2.09)    | 4.44(4.05,4.82)   | 3.65(3.43,3.88) | 39  |
| United Arab Emirates             | 58(47-71)             | 119 | 520(410-651)          | 66  | 8.72(8.48,8.97) | 13.25(12.57,13.93) | 2.55(2.39,2.71)   | 7.89(7.66,8.11) | 2   |
| Yemen                            | 192(157-230)          | 77  | 647(527-793)          | 60  | 4.27(4.16,4.38) | 4.68(4.60,4.76)    | 3.88(3.78,3.97)   | 4.30(4.24,4.36) | 18  |
| Afghanistan                      | 192(159-228)          | 78  | 684(557-828)          | 55  | 4.92(3.91,5.94) | 4.59(4.49,4.68)    | 4.59(4.49,4.68)   | 4.53(4.14,4.92) | 12  |
| Bangladesh                       | 1,355(1,105-1,656)    | 26  | 3,404(2,788-4,136)    | 21  | 3.94(3.86,4.03) | 2.89(2.69,3.08)    | 2.70(2.57,2.83)   | 3.22(3.13,3.30) | 76  |
| Bhutan                           | 7(6-9)                | 162 | 14(12-17)             | 165 | 2.57(2.10,3.05) | 1.39(1.15,1.62)    | 2.88(2.65,3.12)   | 2.30(2.10,2.49) | 118 |
| India                            | 15,360(12,631-18,815) | 4   | 31,775(26,433-38,972) | 3   | 3.02(2.84,3.19) | 3.35(3.31,3.39)    | 1.03(0.56,1.50)   | 2.52(2.36,2.68) | 106 |
| Nepal                            | 242(198-301)          | 66  | 624(515-764)          | 61  | 3.68(3.55,3.82) | 3.20(3.16,3.25)    | 3.08(2.96,3.19)   | 3.34(3.28,3.40) | 65  |
| Pakistan                         | 1,474(1,218-1,792)    | 23  | 3,888(3,193-4,838)    | 18  | 3.15(3.05,3.24) | 3.24(3.16,3.32)    | 3.75(3.72,3.78)   | 3.42(3.38,3.46) | 60  |
| Angola                           | 75(61-92)             | 108 | 263(219-315)          | 92  | 4.11(4.06,4.17) | 4.52(4.50,4.54)    | 4.66(4.61,4.71)   | 4.45(4.42,4.47) | 14  |
| Central African Republic         | 21(17-25)             | 144 | 42(35-51)             | 150 | 2.70(2.67,2.73) | 2.70(2.67,2.73)    | 2.11(1.82,2.40)   | 2.52(2.42,2.61) | 107 |
| Congo                            | 18(15-22)             | 145 | 60(50-72)             | 143 | 4.99(4.82,5.16) | 3.56(3.18,3.94)    | 4.10(3.82,4.38)   | 4.26(4.09,4.43) | 19  |
| Democratic Republic of the Congo | 256(214-314)          | 63  | 745(616-916)          | 53  | 3.39(3.27,3.52) | 3.20(3.04,3.36)    | 4.91(4.81,5.01)   | 3.78(3.70,3.87) | 32  |
| Equatorial Guinea                | 3(2-3)                | 174 | 15(13-19)             | 162 | 4.45(4.38,4.52) | 7.70(7.57,7.82)    | 5.98(5.85,6.11)   | 6.01(5.94,6.07) | 4   |
| Gabon                            | 9(7-11)               | 160 | 23(19-28)             | 157 | 3.60(3.56,3.65) | 3.10(3.06,3.14)    | 3.56(3.47,3.65)   | 3.43(3.39,3.46) | 58  |
| Burundi                          | 34(28-41)             | 134 | 79(64-95)             | 135 | 1.35(1.16,1.55) | 4.22(3.94,4.50)    | 3.33(3.05,3.60)   | 2.96(2.82,3.10) | 80  |
| Comoros                          | 3(3-4)                | 171 | 7(6-9)                | 172 | 3.32(3.23,3.41) | 2.46(2.38,2.55)    | 3.16(3.09,3.23)   | 2.94(2.89,2.99) | 82  |
| Djibouti                         | 3(2-4)                | 172 | 10(9-13)              | 168 | 4.85(4.29,5.41) | 4.46(4.37,4.55)    | 3.71(3.60,3.82)   | 4.35(4.16,4.54) | 16  |
| Eritrea                          | 18(15-21)             | 146 | 54(44-65)             | 145 | 4.64(4.50,4.79) | 4.05(3.95,4.15)    | 3.31(3.15,3.46)   | 4.00(3.90,4.10) | 27  |
| Ethiopia                         | 270(224-325)          | 62  | 710(590-855)          | 54  | 2.86(2.75,2.98) | 3.20(2.92,3.49)    | 4.14(4.10,4.18)   | 3.39(3.29,3.49) | 62  |
| Kenya                            | 124(103-149)          | 89  | 427(357-512)          | 72  | 3.75(3.59,3.91) | 3.86(3.79,3.93)    | 5.45(5.17,5.72)   | 4.32(4.21,4.43) | 17  |
| Madagascar                       | 79(66-96)             | 105 | 207(172-252)          | 102 | 3.02(2.96,3.08) | 3.73(3.62,3.85)    | 3.40(3.35,3.44)   | 3.38(3.34,3.43) | 64  |
| Malawi                           | 60(50-74)             | 115 | 139(114-170)          | 117 | 1.49(1.00,1.98) | 2.99(2.92,3.06)    | 4.14(4.07,4.21)   | 2.89(2.73,3.05) | 84  |
| Mauritius                        | 5(4-6)                | 168 | 9(7-10)               | 171 | 2.50(2.40,2.60) | 1.79(1.76,1.82)    | 1.71(1.69,1.73)   | 1.99(1.95,2.04) | 133 |



|                             |              |     |                    |     |                  |                  |                 |                 |     |
|-----------------------------|--------------|-----|--------------------|-----|------------------|------------------|-----------------|-----------------|-----|
| Mozambique                  | 76(63-93)    | 107 | 192(158-230)       | 107 | 3.25(2.87,3.63)  | 3.26(3.21,3.31)  | 3.36(3.32,3.40) | 3.29(3.16,3.41) | 69  |
| Rwanda                      | 45(37-55)    | 125 | 102(84-124)        | 127 | 0.52(-2.17,3.29) | 4.08(3.50,4.65)  | 3.07(2.41,3.73) | 2.61(1.70,3.53) | 100 |
| Seychelles                  | 0(0-0)       | 194 | 1(1-1)             | 192 | 3.07(3.02,3.12)  | 2.36(2.30,2.43)  | 2.42(2.14,2.70) | 2.62(2.52,2.71) | 99  |
| Somalia                     | 37(30-44)    | 132 | 100(81-124)        | 128 | 3.49(3.28,3.69)  | 3.72(3.68,3.76)  | 3.54(3.38,3.69) | 3.57(3.48,3.66) | 46  |
| United Republic of Tanzania | 156(128-188) | 84  | 421(348-511)       | 73  | 2.96(2.92,2.99)  | 3.40(3.38,3.42)  | 4.06(4.02,4.10) | 3.49(3.47,3.51) | 50  |
| Uganda                      | 97(79-119)   | 98  | 281(232-342)       | 87  | 3.17(3.07,3.27)  | 3.91(3.67,4.14)  | 4.13(4.08,4.19) | 3.74(3.66,3.83) | 34  |
| Zambia                      | 53(44-64)    | 121 | 143(117-174)       | 115 | 2.27(2.17,2.37)  | 4.28(4.13,4.42)  | 3.64(3.54,3.73) | 3.44(3.37,3.51) | 57  |
| Botswana                    | 12(10-14)    | 157 | 31(26-39)          | 153 | 3.56(3.42,3.71)  | 3.38(3.06,3.71)  | 3.64(3.42,3.86) | 3.56(3.42,3.70) | 47  |
| Lesotho                     | 15(13-19)    | 148 | 25(20-30)          | 156 | 1.85(1.70,2.00)  | 0.84(0.72,0.95)  | 2.05(2.01,2.09) | 1.59(1.52,1.66) | 151 |
| Namibia                     | 13(11-15)    | 154 | 27(23-33)          | 154 | 3.76(3.73,3.79)  | 2.21(2.16,2.26)  | 2.04(1.98,2.10) | 2.69(2.66,2.72) | 95  |
| South Africa                | 376(317-452) | 52  | 746(636-891)       | 52  | 3.13(3.01,3.26)  | 1.61(1.39,1.84)  | 2.49(2.41,2.57) | 2.44(2.35,2.53) | 113 |
| Eswatini                    | 6(5-8)       | 164 | 13(11-16)          | 167 | 3.74(3.52,3.96)  | 1.48(1.36,1.61)  | 2.42(2.34,2.50) | 2.56(2.46,2.65) | 101 |
| Zimbabwe                    | 81(67-99)    | 103 | 146(120-178)       | 113 | 2.93(2.59,3.28)  | 0.08(-0.06,0.23) | 3.09(2.96,3.21) | 1.99(1.87,2.12) | 134 |
| Benin                       | 32(26-39)    | 136 | 97(80-116)         | 129 | 3.29(3.22,3.35)  | 3.63(3.58,3.67)  | 4.97(4.73,5.21) | 3.93(3.86,4.01) | 28  |
| Burkina Faso                | 60(50-72)    | 117 | 159(132-194)       | 110 | 2.28(2.19,2.36)  | 3.43(3.10,3.76)  | 4.49(4.25,4.73) | 3.41(3.27,3.54) | 61  |
| Cameroon                    | 80(66-97)    | 104 | 265(219-322)       | 91  | 4.32(4.13,4.50)  | 3.65(3.46,3.84)  | 4.51(4.21,4.81) | 4.15(4.01,4.29) | 25  |
| Cabo Verde                  | 2(2-3)       | 176 | 6(5-8)             | 174 | 3.49(3.46,3.53)  | 3.04(2.99,3.09)  | 3.98(3.76,4.20) | 3.48(3.41,3.56) | 52  |
| Chad                        | 35(29-43)    | 133 | 97(80-116)         | 130 | 2.66(2.57,2.74)  | 2.89(2.67,3.10)  | 5.05(4.66,5.44) | 3.48(3.33,3.63) | 53  |
| Cote d'Ivoire               | 85(70-103)   | 101 | 242(198-298)       | 98  | 4.91(4.56,5.27)  | 2.35(2.18,2.52)  | 4.06(3.87,4.25) | 3.73(3.58,3.87) | 35  |
| Gambia                      | 6(5-7)       | 165 | 19(16-24)          | 159 | 4.08(4.04,4.12)  | 4.08(4.04,4.12)  | 4.44(4.09,4.79) | 4.19(4.08,4.31) | 23  |
| Ghana                       | 104(86-124)  | 95  | 307(255-370)       | 83  | 3.88(3.65,4.11)  | 3.22(3.06,3.38)  | 4.17(3.92,4.41) | 3.75(3.61,3.89) | 33  |
| Guinea                      | 42(35-52)    | 127 | 91(75-109)         | 133 | 2.80(2.68,2.91)  | 1.57(1.50,1.63)  | 3.79(3.54,4.03) | 2.63(2.55,2.72) | 98  |
| Guinea-Bissau               | 7(5-8)       | 163 | 15(12-18)          | 164 | 2.37(2.35,2.39)  | 2.30(2.24,2.35)  | 4.15(4.07,4.24) | 2.89(2.86,2.93) | 85  |
| Liberia                     | 15(12-18)    | 149 | 43(36-52)          | 149 | 2.93(1.90,3.96)  | 3.22(1.41,5.07)  | 5.17(4.94,5.40) | 3.84(3.16,4.52) | 29  |
| Mali                        | 53(45-66)    | 120 | 143(120-172)       | 114 | 2.98(2.88,3.08)  | 2.67(2.56,2.78)  | 4.98(4.73,5.23) | 3.49(3.40,3.58) | 51  |
| Mauritania                  | 16(13-19)    | 147 | 34(28-41)          | 152 | 1.16(0.68,1.64)  | 3.19(3.12,3.27)  | 3.57(3.26,3.87) | 2.67(2.49,2.86) | 96  |
| Niger                       | 42(35-51)    | 126 | 122(101-148)       | 121 | 3.74(3.69,3.80)  | 2.73(2.66,2.81)  | 4.75(4.57,4.93) | 3.70(3.63,3.76) | 36  |
| Nigeria                     | 634(536-771) | 40  | 1,713(1,440-2,066) | 28  | 2.97(2.90,3.04)  | 2.67(2.25,3.10)  | 5.03(4.59,5.47) | 3.47(3.22,3.71) | 54  |
| Sao Tome and Principe       | 1(1-1)       | 187 | 2(2-2)             | 188 | 2.15(2.10,2.19)  | 2.47(2.34,2.60)  | 5.43(4.99,5.87) | 3.31(3.15,3.46) | 67  |
| Senegal                     | 51(42-62)    | 123 | 132(109-161)       | 118 | 3.21(3.17,3.26)  | 2.69(2.60,2.77)  | 4.14(3.81,4.48) | 3.30(3.19,3.41) | 68  |
| Sierra Leone                | 27(23-33)    | 142 | 67(55-81)          | 138 | 1.33(1.02,1.63)  | 3.08(2.45,3.71)  | 5.16(4.90,5.42) | 3.28(3.03,3.54) | 70  |
| Togo                        | 22(18-27)    | 143 | 74(62-90)          | 137 | 5.20(4.98,5.43)  | 3.06(2.93,3.19)  | 4.63(4.10,5.17) | 4.21(4.02,4.40) | 20  |
| American Samoa              | 0(0-0)       | 197 | 0(0-0)             | 197 | 2.97(2.81,3.12)  | 1.48(1.34,1.63)  | 1.37(1.15,1.59) | 1.93(1.82,2.05) | 140 |
| Bermuda                     | 2(1-2)       | 182 | 2(2-3)             | 185 | 2.78(2.45,3.10)  | 0.02(-0.18,0.21) | 1.74(1.60,1.88) | 1.58(1.44,1.71) | 154 |
| Cook Islands                | 0(0-0)       | 199 | 0(0-0)             | 200 | 1.49(1.46,1.51)  | 2.13(2.03,2.22)  | 1.82(1.68,1.95) | 1.79(1.74,1.85) | 146 |
| Greenland                   | 11(9-14)     | 158 | 15(13-18)          | 163 | 1.86(1.48,2.24)  | 1.16(0.97,1.35)  | 0.16(0.03,0.29) | 1.06(0.91,1.21) | 170 |
| Guam                        | 1(1-1)       | 188 | 1(1-2)             | 190 | 2.39(2.31,2.47)  | 2.26(2.09,2.44)  | 1.96(1.87,2.06) | 2.24(2.16,2.31) | 122 |
| Monaco                      | 3(3-4)       | 169 | 4(4-5)             | 177 | 1.08(1.05,1.10)  | 0.55(0.49,0.61)  | 0.29(0.24,0.34) | 0.65(0.62,0.67) | 184 |

|                                       |                    |     |                    |     |                   |                    |                    |                 |     |
|---------------------------------------|--------------------|-----|--------------------|-----|-------------------|--------------------|--------------------|-----------------|-----|
| Nauru                                 | 0(0-0)             | 202 | 0(0-0)             | 202 | 2.46(1.69,3.23)   | 0.90(0.81,0.98)    | 0.90(0.81,0.98)    | 1.38(1.13,1.62) | 161 |
| Niue                                  | 0(0-0)             | 203 | 0(0-0)             | 203 | 0.09(0.01,0.17)   | 0.24(0.17,0.32)    | 2.02(1.94,2.10)    | 0.76(0.71,0.81) | 181 |
| Northern Mariana Islands              | 0(0-0)             | 196 | 0(0-0)             | 196 | 4.94(3.82,6.06)   | -1.52(-2.76,-0.26) | -0.50(-0.73,-0.26) | 1.20(0.63,1.76) | 165 |
| Palau                                 | 0(0-0)             | 200 | 0(0-0)             | 199 | 4.75(4.66,4.83)   | 1.14(0.93,1.34)    | 1.96(1.87,2.05)    | 2.54(2.44,2.65) | 104 |
| Puerto Rico                           | 87(79-94)          | 100 | 122(108-137)       | 123 | 2.80(2.64,2.96)   | -0.51(-0.70,-0.32) | 1.32(0.81,1.83)    | 1.19(1.01,1.37) | 166 |
| Saint Kitts and Nevis                 | 1(1-1)             | 186 | 2(2-2)             | 187 | 4.62(4.36,4.88)   | 1.77(1.63,1.91)    | 3.86(3.71,4.00)    | 3.42(3.31,3.53) | 59  |
| San Marino                            | 2(2-3)             | 179 | 3(3-4)             | 180 | 2.41(2.32,2.51)   | 1.16(1.14,1.19)    | 1.02(0.94,1.10)    | 1.56(1.51,1.60) | 156 |
| Tokelau                               | 0(0-0)             | 204 | 0(0-0)             | 204 | -0.01(-0.16,0.14) | -1.99(-2.75,-1.22) | 4.00(3.82,4.17)    | 0.73(0.47,0.98) | 182 |
| Tuvalu                                | 0(0-0)             | 201 | 0(0-0)             | 201 | 1.64(1.63,1.66)   | 2.58(2.53,2.63)    | 2.66(2.57,2.75)    | 2.32(2.29,2.36) | 117 |
| United States Virgin Islands          | 2(2-3)             | 177 | 4(3-4)             | 178 | 3.63(3.50,3.77)   | 0.12(-0.02,0.26)   | 0.83(0.23,1.44)    | 1.54(1.34,1.74) | 157 |
| South Sudan                           | 37(31-45)          | 131 | 63(53-76)          | 142 | 2.16(2.05,2.28)   | 2.81(2.66,2.97)    | 0.70(0.15,1.24)    | 1.94(1.75,2.13) | 136 |
| Sudan                                 | 334(275-400)       | 57  | 934(775-1,114)     | 46  | 3.67(3.53,3.81)   | 3.12(2.99,3.24)    | 4.03(3.88,4.19)    | 3.58(3.48,3.67) | 43  |
| <b>Multiple sclerosis</b>             |                    |     |                    |     |                   |                    |                    |                 |     |
| China                                 | 2,005(1,619-2,432) | 5   | 2,967(2,423-3,547) | 3   | 1.43(1.40,1.46)   | 1.11(1.07,1.15)    | 1.50(1.42,1.59)    | 1.34(1.31,1.37) | 128 |
| Democratic People's Republic of Korea | 61(49-74)          | 64  | 85(69-102)         | 75  | 1.17(1.09,1.25)   | 1.22(1.14,1.30)    | 1.18(1.11,1.25)    | 1.19(1.14,1.24) | 136 |
| Taiwan (Province of China)            | 34(30-38)          | 88  | 67(58-77)          | 92  | 1.18(1.07,1.28)   | 4.38(4.14,4.61)    | 1.79(1.46,2.12)    | 2.30(2.17,2.43) | 88  |
| Cambodia                              | 14(11-17)          | 123 | 28(23-35)          | 122 | 2.57(2.53,2.62)   | 2.55(2.53,2.57)    | 2.16(2.14,2.18)    | 2.44(2.42,2.45) | 81  |
| Indonesia                             | 255(198-313)       | 28  | 427(343-517)       | 32  | 2.14(2.10,2.17)   | 1.70(1.67,1.72)    | 1.57(1.56,1.59)    | 1.80(1.79,1.81) | 112 |
| Lao People's Democratic Republic      | 7(6-9)             | 142 | 14(12-18)          | 140 | 2.56(2.52,2.59)   | 2.44(2.27,2.60)    | 2.39(2.35,2.43)    | 2.46(2.41,2.52) | 80  |
| Malaysia                              | 19(15-23)          | 113 | 40(31-48)          | 111 | 3.75(3.71,3.79)   | 2.44(2.36,2.53)    | 1.64(1.58,1.70)    | 2.62(2.58,2.66) | 72  |
| Maldives                              | 0(0-0)             | 190 | 1(0-1)             | 180 | 3.43(3.30,3.56)   | 3.74(3.71,3.77)    | 4.41(4.32,4.49)    | 3.87(3.82,3.93) | 19  |
| Myanmar                               | 91(73-110)         | 60  | 139(112-167)       | 60  | 1.81(1.79,1.84)   | 1.34(1.32,1.35)    | 1.26(1.15,1.37)    | 1.47(1.44,1.51) | 123 |
| Philippines                           | 97(76-119)         | 59  | 201(161-245)       | 49  | 2.73(2.70,2.75)   | 2.51(2.44,2.57)    | 2.47(2.43,2.50)    | 2.58(2.55,2.60) | 73  |
| Sri Lanka                             | 25(20-31)          | 100 | 37(31-44)          | 115 | 1.98(1.91,2.05)   | 1.23(1.12,1.35)    | 0.73(0.69,0.77)    | 1.32(1.27,1.36) | 129 |
| Thailand                              | 100(79-123)        | 57  | 151(123-182)       | 53  | 1.73(1.57,1.89)   | 1.64(1.25,2.03)    | 0.99(0.92,1.06)    | 1.43(1.29,1.57) | 125 |
| Timor-Leste                           | 1(1-1)             | 171 | 2(1-2)             | 170 | 1.55(1.49,1.61)   | 2.18(2.09,2.26)    | 2.91(2.89,2.92)    | 2.21(2.18,2.24) | 95  |
| Viet Nam                              | 113(90-138)        | 53  | 206(166-248)       | 47  | 2.53(2.48,2.59)   | 2.20(2.16,2.24)    | 1.55(1.52,1.58)    | 2.10(2.07,2.12) | 103 |
| Fiji                                  | 1(1-1)             | 167 | 2(1-2)             | 171 | 1.11(1.08,1.14)   | 1.29(1.28,1.30)    | 0.82(0.77,0.86)    | 1.07(1.06,1.09) | 142 |
| Kiribati                              | 0(0-0)             | 195 | 0(0-0)             | 194 | 2.22(2.07,2.37)   | 2.34(2.22,2.46)    | 0.64(0.50,0.78)    | 1.76(1.67,1.85) | 117 |
| Marshall Islands                      | 0(0-0)             | 198 | 0(0-0)             | 198 | 2.75(2.70,2.79)   | 1.36(1.28,1.44)    | 0.82(0.77,0.86)    | 1.62(1.58,1.66) | 120 |
| Micronesia (Federated States of)      | 0(0-0)             | 194 | 0(0-0)             | 195 | 1.43(1.30,1.55)   | 0.33(0.26,0.40)    | 0.06(0.03,0.08)    | 0.58(0.54,0.63) | 160 |
| Papua New Guinea                      | 4(3-5)             | 150 | 11(8-13)           | 147 | 2.97(2.92,3.02)   | 3.54(3.49,3.59)    | 3.30(3.26,3.34)    | 3.29(3.26,3.31) | 37  |
| Samoa                                 | 0(0-0)             | 187 | 0(0-0)             | 189 | 1.11(1.07,1.16)   | 0.92(0.90,0.94)    | 1.52(1.49,1.55)    | 1.18(1.16,1.20) | 137 |
| Solomon Islands                       | 0(0-0)             | 179 | 1(1-1)             | 175 | 3.52(3.44,3.60)   | 2.52(2.43,2.61)    | 1.88(1.79,1.97)    | 2.63(2.57,2.68) | 71  |
| Tonga                                 | 0(0-0)             | 192 | 0(0-0)             | 193 | 0.62(0.59,0.66)   | 0.76(0.74,0.78)    | 0.24(0.22,0.26)    | 0.54(0.53,0.56) | 161 |
| Vanuatu                               | 0(0-0)             | 188 | 0(0-1)             | 184 | 2.58(2.55,2.62)   | 3.03(3.02,3.05)    | 2.49(2.47,2.50)    | 2.70(2.69,2.72) | 68  |
| Armenia                               | 37(31-42)          | 83  | 46(40-53)          | 104 | 1.71(1.54,1.89)   | 0.87(0.69,1.05)    | -0.15(-0.20,-0.09) | 0.83(0.74,0.91) | 152 |
| Azerbaijan                            | 56(46-66)          | 70  | 105(87-124)        | 70  | 1.48(1.23,1.72)   | 2.93(2.54,3.32)    | 2.33(2.18,2.48)    | 2.25(2.10,2.41) | 91  |

|                        |                    |     |                    |     |                    |                    |                    |                    |     |
|------------------------|--------------------|-----|--------------------|-----|--------------------|--------------------|--------------------|--------------------|-----|
| Georgia                | 50(42-59)          | 74  | 43(36-50)          | 109 | -0.57(-1.16,0.03)  | -0.68(-0.76,-0.60) | -0.20(-0.39,0.00)  | -0.50(-0.69,-0.30) | 189 |
| Kazakhstan             | 416(372-460)       | 18  | 551(491-617)       | 25  | 0.59(0.44,0.75)    | 2.09(1.96,2.23)    | 0.01(-0.15,0.17)   | 0.96(0.86,1.06)    | 150 |
| Kyrgyzstan             | 33(27-39)          | 90  | 57(46-67)          | 97  | 1.08(0.84,1.33)    | 2.15(2.03,2.28)    | 2.60(2.51,2.69)    | 1.96(1.85,2.07)    | 106 |
| Mongolia               | 18(14-21)          | 119 | 38(31-45)          | 113 | 1.34(1.05,1.63)    | 3.12(2.96,3.27)    | 3.46(2.94,3.98)    | 2.66(2.45,2.87)    | 70  |
| Tajikistan             | 32(26-39)          | 91  | 76(62-91)          | 85  | 1.52(1.22,1.82)    | 3.59(3.45,3.73)    | 4.04(3.95,4.13)    | 3.06(2.93,3.20)    | 48  |
| Turkmenistan           | 43(37-48)          | 81  | 84(75-94)          | 78  | 2.91(2.81,3.00)    | 2.89(2.82,2.95)    | 1.25(1.19,1.31)    | 2.38(2.33,2.42)    | 85  |
| Uzbekistan             | 203(172-236)       | 34  | 352(293-414)       | 33  | 2.23(2.04,2.43)    | 2.58(2.26,2.90)    | 0.82(0.69,0.95)    | 1.88(1.75,2.00)    | 111 |
| Albania                | 115(105-125)       | 52  | 86(80-93)          | 74  | 1.11(0.99,1.24)    | -0.46(-0.59,-0.34) | -3.61(-4.60,-2.60) | -0.98(-1.31,-0.65) | 196 |
| Bosnia and Herzegovina | 56(48-64)          | 71  | 38(33-42)          | 114 | -1.31(-1.66,-0.95) | -0.89(-1.05,-0.73) | -2.22(-2.28,-2.15) | -1.44(-1.57,-1.31) | 201 |
| Bulgaria               | 197(181-216)       | 36  | 141(127-156)       | 58  | -0.05(-0.12,0.01)  | -0.73(-0.81,-0.66) | -2.89(-3.56,-2.22) | -1.20(-1.42,-0.99) | 198 |
| Croatia                | 50(44-56)          | 75  | 49(43-55)          | 101 | 0.39(0.37,0.42)    | -0.09(-0.16,-0.01) | -0.60(-0.62,-0.58) | -0.10(-0.13,-0.07) | 185 |
| Czechia                | 167(150-184)       | 40  | 140(123-157)       | 59  | 0.10(0.05,0.16)    | -0.61(-0.68,-0.54) | -1.33(-1.42,-1.25) | -0.62(-0.66,-0.58) | 193 |
| Hungary                | 203(187-219)       | 33  | 130(114-146)       | 62  | 0.00(-0.06,0.07)   | -0.50(-0.60,-0.40) | -4.22(-4.69,-3.76) | -1.51(-1.67,-1.35) | 203 |
| North Macedonia        | 28(24-31)          | 96  | 37(32-41)          | 117 | 1.52(1.35,1.69)    | 1.37(1.22,1.52)    | 0.14(-0.22,0.50)   | 1.00(0.83,1.16)    | 146 |
| Montenegro             | 13(11-14)          | 124 | 13(12-14)          | 143 | 0.93(0.88,0.98)    | 0.23(-0.02,0.47)   | -1.01(-1.11,-0.91) | 0.05(-0.03,0.14)   | 181 |
| Poland                 | 976(846-1,103)     | 13  | 817(725-908)       | 16  | -0.24(-0.46,-0.03) | -0.38(-0.46,-0.30) | -1.18(-1.22,-1.14) | -0.60(-0.67,-0.52) | 191 |
| Romania                | 203(175-232)       | 35  | 144(123-169)       | 56  | -0.35(-0.36,-0.33) | -1.31(-1.33,-1.29) | -1.90(-1.95,-1.85) | -1.16(-1.18,-1.14) | 197 |
| Serbia                 | 149(134-163)       | 42  | 150(136-163)       | 54  | 1.03(0.51,1.55)    | -0.42(-0.57,-0.27) | -0.64(-0.69,-0.59) | 0.01(-0.20,0.22)   | 182 |
| Slovakia               | 57(48-65)          | 69  | 63(55-72)          | 93  | 0.85(0.77,0.93)    | 0.32(0.17,0.46)    | 0.01(-0.07,0.08)   | 0.39(0.32,0.46)    | 170 |
| Slovenia               | 34(31-38)          | 87  | 34(30-37)          | 119 | 0.95(0.92,0.98)    | 0.00(-0.07,0.06)   | -1.12(-1.17,-1.08) | -0.05(-0.08,-0.02) | 184 |
| Belarus                | 99(83-115)         | 58  | 84(71-97)          | 77  | -0.13(-0.16,-0.10) | -0.38(-0.47,-0.28) | -1.12(-1.29,-0.95) | -0.53(-0.60,-0.47) | 190 |
| Estonia                | 20(17-22)          | 112 | 13(12-15)          | 141 | -1.89(-2.04,-1.75) | -0.67(-0.81,-0.54) | -1.70(-1.82,-1.58) | -1.37(-1.45,-1.28) | 200 |
| Latvia                 | 36(32-40)          | 84  | 22(19-25)          | 129 | -1.45(-1.49,-1.41) | -1.04(-1.07,-1.00) | -2.48(-2.56,-2.40) | -1.67(-1.71,-1.64) | 204 |
| Lithuania              | 48(42-54)          | 77  | 31(27-35)          | 121 | -0.68(-0.78,-0.58) | -1.58(-1.65,-1.50) | -2.25(-2.31,-2.19) | -1.51(-1.56,-1.46) | 202 |
| Republic of Moldova    | 30(24-36)          | 93  | 26(22-30)          | 124 | -0.35(-0.69,-0.01) | -0.42(-0.51,-0.32) | -0.68(-0.79,-0.56) | -0.48(-0.59,-0.36) | 188 |
| Russian Federation     | 1,764(1,486-2,026) | 6   | 1,339(1,130-1,547) | 12  | -0.68(-0.74,-0.61) | -0.35(-0.38,-0.33) | -1.92(-2.05,-1.78) | -0.94(-0.99,-0.89) | 195 |
| Ukraine                | 925(800-1,047)     | 14  | 636(548-725)       | 19  | -0.84(-1.01,-0.67) | -0.40(-0.50,-0.31) | -2.91(-3.46,-2.35) | -1.32(-1.51,-1.14) | 199 |
| Brunei Darussalam      | 0(0-0)             | 180 | 1(1-1)             | 176 | 4.11(3.99,4.24)    | 2.32(2.16,2.48)    | 0.83(0.67,0.99)    | 2.40(2.31,2.49)    | 83  |
| Japan                  | 467(380-563)       | 17  | 496(408-590)       | 29  | 0.76(0.66,0.87)    | -0.26(-0.29,-0.23) | 0.13(0.05,0.21)    | 0.23(0.18,0.28)    | 176 |
| Republic of Korea      | 184(144-225)       | 37  | 222(181-270)       | 44  | 0.57(0.53,0.61)    | 0.62(0.61,0.63)    | 0.77(0.71,0.82)    | 0.65(0.63,0.68)    | 157 |
| Singapore              | 4(3-5)             | 149 | 8(7-10)            | 151 | 4.17(3.95,4.40)    | 2.16(1.56,2.76)    | 0.01(-0.26,0.28)   | 2.20(1.97,2.43)    | 98  |
| Australia              | 282(252-313)       | 27  | 532(466-600)       | 26  | 4.54(3.87,5.21)    | 1.51(1.39,1.63)    | 0.78(0.35,1.21)    | 2.21(1.96,2.46)    | 92  |
| New Zealand            | 55(46-62)          | 73  | 60(52-69)          | 96  | 0.74(0.59,0.90)    | 0.64(0.56,0.73)    | -0.35(-0.45,-0.26) | 0.35(0.27,0.42)    | 172 |
| Andorra                | 1(1-1)             | 166 | 2(2-2)             | 169 | 2.36(0.65,4.10)    | 2.37(0.80,3.97)    | -1.44(-1.94,-0.93) | 0.95(0.18,1.74)    | 151 |
| Austria                | 179(154-204)       | 39  | 241(211-272)       | 40  | 1.50(1.36,1.63)    | 0.59(0.44,0.75)    | 1.21(1.07,1.36)    | 1.06(0.97,1.16)    | 143 |
| Belgium                | 254(227-280)       | 29  | 285(249-323)       | 37  | 0.33(0.28,0.38)    | 0.57(0.55,0.59)    | 0.27(0.22,0.31)    | 0.39(0.37,0.41)    | 171 |
| Cyprus                 | 10(9-11)           | 132 | 22(19-26)          | 128 | 2.34(2.25,2.43)    | 4.14(3.93,4.36)    | 2.08(1.94,2.22)    | 2.90(2.81,3.00)    | 58  |
| Denmark                | 215(199-232)       | 32  | 222(200-247)       | 43  | 0.34(0.29,0.40)    | -0.21(-0.25,-0.16) | 0.21(0.13,0.28)    | 0.09(0.06,0.12)    | 179 |

|                                  |                     |     |                      |     |                    |                    |                    |                    |     |
|----------------------------------|---------------------|-----|----------------------|-----|--------------------|--------------------|--------------------|--------------------|-----|
| Finland                          | 133(119-145)        | 46  | 144(132-156)         | 57  | 0.36(0.18,0.54)    | -0.40(-0.50,-0.30) | 0.90(0.36,1.44)    | 0.24(0.06,0.42)    | 174 |
| France                           | 1,373(1,192-1,587)  | 7   | 1,629(1,457-1,803)   | 8   | 1.33(1.16,1.49)    | 0.51(0.48,0.54)    | -0.01(-0.05,0.03)  | 0.60(0.55,0.66)    | 158 |
| Germany                          | 2,305(2,031-2,607)  | 3   | 2,425(2,125-2,755)   | 5   | 0.70(0.62,0.77)    | -0.36(-0.40,-0.31) | 0.28(0.23,0.34)    | 0.18(0.14,0.21)    | 177 |
| Greece                           | 108(94-121)         | 55  | 123(106-140)         | 63  | 1.94(1.88,2.00)    | 0.28(0.18,0.38)    | -0.79(-0.85,-0.73) | 0.46(0.42,0.51)    | 165 |
| Iceland                          | 10(10-11)           | 131 | 13(11-15)            | 144 | 0.77(0.66,0.89)    | 1.65(1.36,1.95)    | 0.01(-0.16,0.18)   | 0.79(0.67,0.90)    | 155 |
| Ireland                          | 145(128-161)        | 43  | 197(168-225)         | 50  | 2.09(1.90,2.28)    | 2.83(2.73,2.93)    | -1.58(-1.96,-1.20) | 1.12(0.98,1.27)    | 140 |
| Israel                           | 55(45-65)           | 72  | 110(92-128)          | 68  | 2.67(2.64,2.70)    | 2.47(2.45,2.50)    | 2.06(1.98,2.14)    | 2.41(2.38,2.43)    | 82  |
| Italy                            | 1,292(1,109-1,487)  | 8   | 1,424(1,204-1,658)   | 11  | -0.15(-0.21,-0.08) | 1.09(0.99,1.20)    | -0.09(-0.44,0.25)  | 0.32(0.20,0.44)    | 173 |
| Luxembourg                       | 12(11-14)           | 127 | 20(17-23)            | 132 | 1.61(1.54,1.68)    | 1.30(1.22,1.37)    | 2.20(2.14,2.25)    | 1.70(1.66,1.74)    | 118 |
| Malta                            | 3(3-3)              | 156 | 4(4-5)               | 158 | 1.00(0.99,1.01)    | 0.69(0.65,0.73)    | 1.73(1.65,1.80)    | 1.11(1.08,1.14)    | 141 |
| Netherlands                      | 504(451-569)        | 16  | 503(441-569)         | 28  | 0.39(0.26,0.53)    | -0.08(-0.11,-0.05) | -0.34(-0.38,-0.31) | -0.01(-0.06,0.04)  | 183 |
| Norway                           | 153(134-175)        | 41  | 264(225-303)         | 39  | 2.05(1.88,2.22)    | 1.41(1.20,1.63)    | 2.44(2.35,2.54)    | 1.94(1.83,2.04)    | 107 |
| Portugal                         | 123(103-142)        | 50  | 118(107-131)         | 65  | 0.72(0.68,0.76)    | -0.15(-0.23,-0.08) | -0.98(-1.02,-0.94) | -0.12(-0.15,-0.09) | 186 |
| Spain                            | 739(663-822)        | 15  | 1,073(973-1,172)     | 13  | 2.86(2.18,3.55)    | 1.98(1.58,2.38)    | -0.49(-0.69,-0.29) | 1.34(1.07,1.61)    | 127 |
| Sweden                           | 382(333-435)        | 20  | 508(445-574)         | 27  | 0.89(0.78,0.99)    | 1.00(0.90,1.10)    | 1.08(1.01,1.15)    | 1.00(0.94,1.05)    | 147 |
| Switzerland                      | 242(219-270)        | 30  | 287(253-322)         | 36  | 0.53(0.49,0.57)    | 0.61(0.59,0.62)    | 0.58(0.54,0.62)    | 0.58(0.56,0.60)    | 159 |
| United Kingdom                   | 2,006(1,777-2,233)  | 4   | 2,873(2,535-3,227)   | 4   | 1.64(1.43,1.85)    | 1.01(0.83,1.20)    | 1.21(1.15,1.26)    | 1.29(1.20,1.38)    | 131 |
| Argentina                        | 309(259-356)        | 23  | 466(392-538)         | 31  | 1.62(1.61,1.63)    | 1.57(1.56,1.58)    | 1.08(1.00,1.17)    | 1.43(1.40,1.46)    | 124 |
| Chile                            | 108(87-131)         | 54  | 158(129-188)         | 51  | 1.04(1.01,1.06)    | 1.21(1.18,1.24)    | 1.67(1.44,1.90)    | 1.30(1.22,1.37)    | 130 |
| Uruguay                          | 28(24-33)           | 95  | 33(28-38)            | 120 | 0.90(0.84,0.96)    | 0.50(0.47,0.53)    | 0.04(-0.03,0.10)   | 0.48(0.45,0.51)    | 164 |
| Canada                           | 1,262(1,231-1,297)  | 9   | 1,591(1,548-1,638)   | 9   | 0.62(0.54,0.70)    | 0.28(0.25,0.31)    | 1.56(1.48,1.64)    | 0.79(0.75,0.83)    | 154 |
| United States of America         | 9,344(8,082-10,656) | 1   | 10,465(9,519-11,369) | 1   | -0.30(-0.40,-0.20) | 0.75(0.72,0.78)    | 0.67(0.60,0.73)    | 0.40(0.36,0.44)    | 169 |
| Antigua and Barbuda              | 0(0-0)              | 181 | 1(1-1)               | 177 | 5.48(5.42,5.53)    | 2.07(1.91,2.22)    | 0.02(-0.03,0.06)   | 2.51(2.46,2.56)    | 77  |
| Bahamas                          | 1(1-2)              | 165 | 2(2-3)               | 163 | 2.87(2.82,2.92)    | 1.88(1.81,1.95)    | 1.24(1.21,1.26)    | 1.98(1.95,2.01)    | 105 |
| Barbados                         | 2(1-2)              | 164 | 2(2-2)               | 166 | 2.30(2.22,2.38)    | 1.22(1.18,1.26)    | 0.17(0.12,0.22)    | 1.22(1.19,1.26)    | 134 |
| Belize                           | 1(0-1)              | 174 | 2(1-2)               | 173 | 3.69(3.67,3.71)    | 4.19(4.16,4.22)    | 3.77(3.69,3.85)    | 3.89(3.86,3.92)    | 17  |
| Cuba                             | 59(48-70)           | 66  | 68(58-79)            | 91  | 1.99(1.85,2.14)    | 0.11(0.06,0.16)    | -0.51(-0.53,-0.49) | 0.50(0.45,0.55)    | 162 |
| Dominica                         | 0(0-0)              | 186 | 0(0-0)               | 190 | 0.41(0.37,0.46)    | 0.39(0.37,0.41)    | 0.64(0.60,0.69)    | 0.48(0.45,0.50)    | 163 |
| Dominican Republic               | 23(18-29)           | 106 | 44(35-53)            | 108 | 2.39(2.28,2.49)    | 2.04(2.00,2.08)    | 2.23(2.19,2.27)    | 2.21(2.17,2.25)    | 93  |
| Grenada                          | 0(0-0)              | 182 | 1(0-1)               | 181 | 4.62(4.40,4.85)    | 1.22(0.99,1.45)    | -0.57(-0.63,-0.52) | 1.76(1.66,1.87)    | 115 |
| Guyana                           | 2(1-2)              | 162 | 2(2-3)               | 167 | 0.79(0.70,0.87)    | 0.29(0.27,0.31)    | 1.15(1.05,1.25)    | 0.71(0.67,0.75)    | 156 |
| Haiti                            | 24(19-29)           | 103 | 61(49-73)            | 95  | 3.43(3.38,3.47)    | 3.51(3.46,3.56)    | 2.89(2.84,2.95)    | 3.26(3.22,3.31)    | 39  |
| Jamaica                          | 8(6-9)              | 140 | 12(9-14)             | 145 | 1.91(1.85,1.97)    | 1.22(1.18,1.25)    | 1.30(1.03,1.56)    | 1.48(1.39,1.57)    | 121 |
| Saint Lucia                      | 0(0-1)              | 178 | 1(1-1)               | 178 | 2.86(2.81,2.92)    | 2.02(1.97,2.07)    | 0.94(0.90,0.98)    | 1.94(1.91,1.97)    | 108 |
| Saint Vincent and the Grenadines | 0(0-0)              | 184 | 0(0-1)               | 187 | 1.54(1.48,1.61)    | 1.01(0.94,1.07)    | 0.54(0.51,0.57)    | 1.02(0.99,1.05)    | 145 |
| Suriname                         | 1(1-1)              | 172 | 2(1-2)               | 172 | 2.85(2.80,2.91)    | 2.60(2.57,2.63)    | 0.78(0.74,0.81)    | 2.10(2.08,2.13)    | 102 |
| Trinidad and Tobago              | 3(3-4)              | 154 | 5(4-6)               | 156 | 2.13(2.07,2.20)    | 1.39(1.33,1.45)    | 0.32(0.28,0.36)    | 1.29(1.26,1.32)    | 132 |
| Bolivia (Plurinational State of) | 19(15-23)           | 115 | 47(37-56)            | 103 | 3.79(3.78,3.81)    | 3.37(3.34,3.41)    | 2.49(2.47,2.50)    | 3.20(3.19,3.22)    | 46  |

|                                    |                    |     |                    |     |                 |                    |                    |                 |     |
|------------------------------------|--------------------|-----|--------------------|-----|-----------------|--------------------|--------------------|-----------------|-----|
| Ecuador                            | 18(14-22)          | 118 | 45(36-53)          | 107 | 4.11(4.04,4.18) | 3.06(3.02,3.10)    | 2.53(2.43,2.62)    | 3.21(3.17,3.26) | 44  |
| Peru                               | 49(39-60)          | 76  | 115(92-136)        | 66  | 3.58(3.43,3.72) | 2.82(2.77,2.87)    | 2.64(2.60,2.68)    | 3.00(2.94,3.06) | 53  |
| Colombia                           | 57(45-69)          | 68  | 114(91-136)        | 67  | 3.91(3.79,4.04) | 2.21(2.05,2.37)    | 1.05(0.99,1.11)    | 2.36(2.29,2.44) | 86  |
| Costa Rica                         | 8(6-10)            | 138 | 18(14-21)          | 138 | 4.91(4.72,5.10) | 2.69(2.53,2.85)    | 0.57(0.41,0.73)    | 2.72(2.60,2.83) | 66  |
| El Salvador                        | 11(8-13)           | 130 | 18(14-21)          | 139 | 2.25(2.14,2.35) | 1.59(1.57,1.62)    | 1.48(1.47,1.50)    | 1.76(1.73,1.80) | 114 |
| Guatemala                          | 16(13-20)          | 122 | 55(44-67)          | 98  | 4.46(4.42,4.50) | 4.56(4.54,4.59)    | 3.87(3.82,3.93)    | 4.31(4.28,4.33) | 11  |
| Honduras                           | 9(7-11)            | 136 | 27(21-33)          | 123 | 3.93(3.87,3.99) | 3.97(3.94,3.99)    | 3.41(3.39,3.44)    | 3.77(3.75,3.79) | 21  |
| Mexico                             | 301(242-362)       | 25  | 700(578-818)       | 17  | 4.39(4.33,4.46) | 2.79(2.75,2.84)    | 1.71(1.66,1.75)    | 2.95(2.92,2.99) | 55  |
| Nicaragua                          | 7(6-9)             | 143 | 18(14-21)          | 136 | 4.36(4.29,4.43) | 3.08(3.03,3.13)    | 2.26(2.21,2.31)    | 3.23(3.19,3.27) | 42  |
| Panama                             | 5(4-6)             | 147 | 10(8-12)           | 148 | 3.46(3.38,3.53) | 2.50(2.42,2.59)    | 1.64(1.60,1.69)    | 2.51(2.47,2.56) | 78  |
| Venezuela (Bolivarian Republic of) | 40(32-48)          | 82  | 83(68-98)          | 81  | 4.42(4.07,4.76) | 2.98(2.78,3.18)    | -0.07(-0.41,0.27)  | 2.46(2.27,2.65) | 79  |
| Brazil                             | 1,020(840-1,198)   | 11  | 1,923(1,603-2,265) | 6   | 2.74(2.36,3.12) | 2.31(2.23,2.40)    | 1.43(0.90,1.96)    | 2.17(1.96,2.38) | 99  |
| Paraguay                           | 21(16-25)          | 111 | 45(36-54)          | 106 | 2.32(2.29,2.35) | 2.67(2.64,2.70)    | 3.05(2.78,3.32)    | 2.68(2.60,2.77) | 69  |
| Algeria                            | 287(235-347)       | 26  | 684(567-810)       | 18  | 4.18(4.10,4.26) | 3.15(3.10,3.20)    | 1.75(1.68,1.83)    | 3.03(2.98,3.07) | 49  |
| Bahrain                            | 6(4-7)             | 145 | 21(17-26)          | 130 | 3.46(3.30,3.63) | 9.27(9.00,9.54)    | 1.63(1.21,2.05)    | 4.67(4.48,4.86) | 7   |
| Egypt                              | 353(282-423)       | 21  | 818(658-986)       | 15  | 3.09(2.97,3.22) | 2.93(2.90,2.96)    | 2.85(2.80,2.90)    | 2.96(2.91,3.00) | 54  |
| Iran (Islamic Republic of)         | 1,069(903-1,245)   | 10  | 1,913(1,643-2,191) | 7   | 1.11(0.74,1.49) | 3.50(3.26,3.74)    | 1.46(1.29,1.64)    | 2.13(1.96,2.29) | 101 |
| Iraq                               | 180(143-219)       | 38  | 607(481-749)       | 21  | 4.95(4.15,5.76) | 3.47(2.39,4.57)    | 4.77(4.58,4.96)    | 4.40(3.96,4.84) | 10  |
| Jordan                             | 58(51-66)          | 67  | 202(163-241)       | 48  | 3.31(3.04,3.59) | 3.57(1.11,6.09)    | 5.84(5.22,6.46)    | 4.26(3.45,5.07) | 14  |
| Kuwait                             | 25(20-30)          | 102 | 101(82-120)        | 72  | 3.27(2.86,3.68) | 6.36(6.17,6.55)    | 4.99(4.67,5.30)    | 4.96(4.77,5.16) | 5   |
| Lebanon                            | 43(36-52)          | 80  | 102(84-121)        | 71  | 2.83(2.81,2.85) | 2.83(2.81,2.85)    | 3.39(3.10,3.67)    | 3.00(2.91,3.09) | 52  |
| Libya                              | 44(36-53)          | 79  | 119(101-140)       | 64  | 4.80(4.53,5.07) | 4.21(4.06,4.35)    | 1.35(1.18,1.52)    | 3.48(3.36,3.61) | 27  |
| Morocco                            | 301(245-362)       | 24  | 565(471-673)       | 24  | 2.73(2.69,2.76) | 2.06(2.02,2.10)    | 1.76(1.72,1.81)    | 2.20(2.18,2.22) | 96  |
| Palestine                          | 22(18-27)          | 109 | 74(60-90)          | 87  | 4.92(4.90,4.94) | 4.39(4.33,4.45)    | 3.48(3.43,3.53)    | 4.27(4.24,4.30) | 12  |
| Oman                               | 19(15-22)          | 116 | 82(67-100)         | 82  | 3.88(3.70,4.06) | 3.88(3.70,4.06)    | 7.10(5.90,8.32)    | 5.23(4.76,5.70) | 4   |
| Qatar                              | 7(6-9)             | 141 | 85(73-99)          | 76  | 7.11(6.04,8.18) | 13.02(12.60,13.44) | 6.02(5.60,6.45)    | 8.82(8.41,9.23) | 1   |
| Saudi Arabia                       | 131(103-160)       | 48  | 487(387-593)       | 30  | 4.13(3.92,4.35) | 5.08(5.00,5.17)    | 4.74(4.60,4.88)    | 4.67(4.58,4.77) | 8   |
| Syrian Arab Republic               | 140(110-172)       | 44  | 210(172-253)       | 46  | 3.93(3.80,4.06) | 3.93(3.80,4.06)    | -4.03(-4.87,-3.18) | 1.39(1.10,1.68) | 126 |
| Tunisia                            | 116(95-140)        | 51  | 214(177-252)       | 45  | 3.34(3.28,3.40) | 2.07(1.99,2.15)    | 0.98(0.88,1.08)    | 2.14(2.09,2.19) | 100 |
| Turkey                             | 1,017(972-1,063)   | 12  | 1,562(1,484-1,647) | 10  | 2.20(2.10,2.31) | 1.13(1.06,1.20)    | 1.16(0.73,1.59)    | 1.47(1.33,1.61) | 122 |
| United Arab Emirates               | 25(21-31)          | 99  | 152(120-190)       | 52  | 6.01(5.49,6.53) | 13.70(11.88,15.55) | 0.94(0.49,1.40)    | 6.58(5.99,7.16) | 2   |
| Yemen                              | 80(63-98)          | 61  | 268(216-324)       | 38  | 4.34(4.29,4.39) | 4.72(4.69,4.74)    | 3.69(3.63,3.75)    | 4.26(4.23,4.29) | 13  |
| Afghanistan                        | 133(111-158)       | 47  | 588(490-704)       | 23  | 7.13(5.61,8.68) | 4.69(4.58,4.81)    | 4.69(4.58,4.81)    | 5.28(4.72,5.84) | 3   |
| Bangladesh                         | 327(258-395)       | 22  | 616(497-748)       | 20  | 2.38(2.35,2.42) | 2.21(2.20,2.23)    | 2.02(1.96,2.08)    | 2.20(2.18,2.23) | 97  |
| Bhutan                             | 2(2-3)             | 160 | 3(3-4)             | 160 | 0.79(0.28,1.31) | 2.29(2.13,2.45)    | 1.80(1.55,2.05)    | 1.70(1.49,1.91) | 119 |
| India                              | 2,756(2,197-3,351) | 2   | 5,732(4,618-6,867) | 2   | 2.48(2.45,2.51) | 2.70(2.69,2.72)    | 2.49(2.43,2.56)    | 2.56(2.54,2.59) | 75  |
| Nepal                              | 67(54-81)          | 63  | 132(106-161)       | 61  | 2.24(2.17,2.31) | 2.41(2.39,2.42)    | 2.48(2.31,2.65)    | 2.38(2.32,2.44) | 84  |
| Pakistan                           | 407(327-492)       | 19  | 963(769-1,160)     | 14  | 2.49(2.42,2.56) | 3.10(3.05,3.15)    | 3.45(3.30,3.60)    | 3.02(2.97,3.08) | 50  |

|                                  |              |     |              |     |                  |                 |                 |                 |     |
|----------------------------------|--------------|-----|--------------|-----|------------------|-----------------|-----------------|-----------------|-----|
| Angola                           | 23(18-28)    | 108 | 69(53-85)    | 90  | 3.31(3.28,3.33)  | 4.04(3.98,4.09) | 4.26(4.24,4.28) | 3.88(3.86,3.90) | 18  |
| Central African Republic         | 5(4-6)       | 146 | 11(9-14)     | 146 | 2.65(2.62,2.68)  | 2.72(2.62,2.82) | 2.14(1.82,2.46) | 2.53(2.40,2.67) | 76  |
| Congo                            | 4(3-5)       | 151 | 10(8-12)     | 149 | 3.47(3.46,3.49)  | 3.44(3.42,3.46) | 2.88(2.83,2.93) | 3.27(3.24,3.30) | 38  |
| Democratic Republic of the Congo | 59(46-74)    | 65  | 148(115-185) | 55  | 2.73(2.68,2.77)  | 3.27(3.24,3.29) | 3.69(3.65,3.73) | 3.23(3.21,3.25) | 43  |
| Equatorial Guinea                | 1(1-1)       | 173 | 2(2-3)       | 164 | 3.95(3.89,4.00)  | 4.99(4.98,5.01) | 4.80(4.76,4.84) | 4.58(4.56,4.61) | 9   |
| Gabon                            | 2(1-2)       | 163 | 3(3-4)       | 159 | 2.93(2.91,2.94)  | 2.76(2.74,2.79) | 2.44(2.41,2.48) | 2.71(2.70,2.73) | 67  |
| Burundi                          | 9(7-11)      | 135 | 20(16-26)    | 131 | 0.82(0.48,1.16)  | 3.91(3.77,4.04) | 3.91(3.77,4.04) | 2.83(2.69,2.97) | 59  |
| Comoros                          | 1(1-1)       | 170 | 2(2-2)       | 168 | 2.29(2.24,2.34)  | 2.17(2.15,2.19) | 2.33(2.28,2.38) | 2.26(2.23,2.28) | 89  |
| Djibouti                         | 1(1-1)       | 168 | 3(3-4)       | 161 | 3.36(2.95,3.77)  | 4.52(4.47,4.57) | 3.91(3.72,4.11) | 3.97(3.83,4.12) | 16  |
| Eritrea                          | 8(6-10)      | 139 | 20(16-25)    | 133 | 3.59(3.47,3.71)  | 3.53(3.43,3.63) | 3.08(2.83,3.33) | 3.39(3.28,3.51) | 31  |
| Ethiopia                         | 102(80-127)  | 56  | 226(176-283) | 42  | 2.25(2.19,2.30)  | 2.50(2.45,2.55) | 3.66(3.61,3.71) | 2.78(2.75,2.82) | 60  |
| Kenya                            | 36(28-45)    | 85  | 96(74-119)   | 73  | 3.46(3.45,3.47)  | 3.38(3.37,3.38) | 3.56(3.54,3.58) | 3.46(3.45,3.47) | 28  |
| Madagascar                       | 33(26-41)    | 89  | 84(65-103)   | 79  | 2.60(2.55,2.65)  | 3.21(3.15,3.26) | 3.92(3.85,3.99) | 3.24(3.20,3.28) | 41  |
| Malawi                           | 22(17-27)    | 110 | 46(36-57)    | 105 | 1.10(0.55,1.65)  | 2.58(2.51,2.65) | 3.94(3.85,4.02) | 2.57(2.39,2.75) | 74  |
| Mauritius                        | 2(2-3)       | 159 | 3(3-4)       | 162 | 1.42(1.40,1.44)  | 1.07(1.00,1.14) | 1.08(1.01,1.15) | 1.19(1.16,1.23) | 135 |
| Mozambique                       | 35(28-43)    | 86  | 82(64-101)   | 83  | 2.82(2.17,3.47)  | 2.59(2.50,2.68) | 3.40(3.32,3.49) | 2.93(2.72,3.14) | 56  |
| Rwanda                           | 11(9-14)     | 128 | 23(18-29)    | 127 | 0.53(-1.91,3.02) | 3.06(2.88,3.23) | 3.06(2.88,3.23) | 2.26(1.48,3.06) | 90  |
| Seychelles                       | 0(0-0)       | 193 | 0(0-0)       | 192 | 3.02(2.99,3.05)  | 1.91(1.87,1.94) | 0.43(0.17,0.68) | 1.79(1.71,1.88) | 113 |
| Somalia                          | 13(10-16)    | 125 | 37(28-47)    | 116 | 3.57(3.39,3.76)  | 3.66(3.59,3.73) | 4.28(4.19,4.38) | 3.82(3.74,3.89) | 20  |
| United Republic of Tanzania      | 45(35-56)    | 78  | 109(85-137)  | 69  | 2.92(2.88,2.96)  | 2.92(2.90,2.94) | 3.41(3.38,3.44) | 3.08(3.06,3.09) | 47  |
| Uganda                           | 24(18-30)    | 104 | 62(47-77)    | 94  | 2.95(2.91,2.99)  | 3.29(3.27,3.30) | 3.74(3.69,3.78) | 3.32(3.30,3.34) | 35  |
| Zambia                           | 19(15-23)    | 114 | 48(37-59)    | 102 | 1.94(1.90,1.98)  | 3.56(3.41,3.71) | 4.27(4.25,4.29) | 3.26(3.21,3.32) | 40  |
| Botswana                         | 3(3-4)       | 153 | 8(6-10)      | 152 | 3.24(3.17,3.30)  | 2.69(2.65,2.74) | 2.90(2.83,2.96) | 2.93(2.89,2.97) | 57  |
| Lesotho                          | 6(5-7)       | 144 | 9(7-11)      | 150 | 1.11(0.99,1.22)  | 0.69(0.58,0.79) | 2.09(1.97,2.21) | 1.27(1.19,1.34) | 133 |
| Namibia                          | 4(3-5)       | 152 | 7(6-9)       | 154 | 2.83(2.76,2.91)  | 1.88(1.81,1.94) | 2.32(2.31,2.34) | 2.34(2.31,2.38) | 87  |
| South Africa                     | 135(107-165) | 45  | 233(185-279) | 41  | 2.00(1.95,2.05)  | 1.74(1.70,1.77) | 1.97(1.87,2.06) | 1.90(1.86,1.93) | 110 |
| Eswatini                         | 2(2-3)       | 158 | 4(3-5)       | 157 | 2.72(2.55,2.90)  | 1.24(1.14,1.35) | 2.10(2.04,2.16) | 2.02(1.95,2.10) | 104 |
| Zimbabwe                         | 24(19-30)    | 105 | 41(32-51)    | 110 | 2.13(2.04,2.22)  | 1.26(1.19,1.33) | 2.45(2.36,2.54) | 1.91(1.86,1.97) | 109 |
| Benin                            | 12(10-15)    | 126 | 36(28-44)    | 118 | 3.66(3.64,3.67)  | 3.81(3.78,3.84) | 3.74(3.67,3.80) | 3.74(3.71,3.76) | 22  |
| Burkina Faso                     | 26(21-32)    | 97  | 69(55-85)    | 89  | 2.50(2.40,2.60)  | 3.83(3.81,3.85) | 3.83(3.81,3.85) | 3.39(3.35,3.43) | 32  |
| Cameroon                         | 26(20-32)    | 98  | 83(65-102)   | 80  | 4.20(4.09,4.31)  | 4.36(4.28,4.44) | 3.70(3.60,3.80) | 4.10(4.04,4.16) | 15  |
| Cabo Verde                       | 1(1-1)       | 169 | 2(2-3)       | 165 | 3.04(3.01,3.08)  | 2.95(2.87,3.03) | 2.25(2.22,2.29) | 2.77(2.74,2.80) | 62  |
| Chad                             | 18(14-22)    | 117 | 50(39-61)    | 100 | 2.86(2.85,2.88)  | 3.59(3.57,3.62) | 4.21(4.19,4.24) | 3.55(3.54,3.56) | 25  |
| Cote d'Ivoire                    | 32(25-39)    | 92  | 79(62-97)    | 84  | 4.21(4.10,4.31)  | 3.15(3.09,3.21) | 2.30(2.26,2.35) | 3.21(3.16,3.25) | 45  |
| Gambia                           | 3(2-4)       | 157 | 8(6-10)      | 153 | 3.82(3.72,3.91)  | 3.29(3.26,3.31) | 3.46(3.44,3.48) | 3.51(3.48,3.54) | 26  |
| Ghana                            | 78(65-90)    | 62  | 296(263-333) | 35  | 5.81(5.72,5.90)  | 4.35(4.30,4.39) | 4.04(3.98,4.10) | 4.71(4.67,4.75) | 6   |
| Guinea                           | 17(14-21)    | 120 | 38(31-47)    | 112 | 2.63(2.50,2.76)  | 2.64(2.49,2.79) | 3.14(3.09,3.19) | 2.77(2.69,2.85) | 61  |
| Guinea-Bissau                    | 3(2-4)       | 155 | 7(5-8)       | 155 | 2.33(2.30,2.36)  | 2.99(2.96,3.02) | 2.92(2.83,3.02) | 2.74(2.71,2.77) | 64  |

|                                       |                          |     |                          |     |                    |                    |                    |                    |     |
|---------------------------------------|--------------------------|-----|--------------------------|-----|--------------------|--------------------|--------------------|--------------------|-----|
| Liberia                               | 5(4-6)                   | 148 | 13(10-16)                | 142 | 3.65(1.38,5.97)    | 4.03(3.70,4.36)    | 3.15(2.48,3.83)    | 3.64(2.88,4.40)    | 24  |
| Mali                                  | 29(23-34)                | 94  | 75(60-91)                | 86  | 2.17(2.07,2.27)    | 3.72(3.69,3.76)    | 4.18(4.11,4.24)    | 3.35(3.30,3.39)    | 34  |
| Mauritania                            | 8(6-10)                  | 137 | 18(14-21)                | 137 | 2.65(2.64,2.65)    | 2.73(2.71,2.74)    | 2.85(2.82,2.87)    | 2.73(2.72,2.74)    | 65  |
| Niger                                 | 25(20-31)                | 101 | 72(57-87)                | 88  | 3.34(3.30,3.38)    | 3.52(3.50,3.53)    | 4.15(4.12,4.18)    | 3.67(3.65,3.68)    | 23  |
| Nigeria                               | 229(182-282)             | 31  | 599(474-736)             | 22  | 3.14(3.10,3.19)    | 3.44(3.42,3.46)    | 3.52(3.43,3.61)    | 3.37(3.34,3.41)    | 33  |
| Sao Tome and Principe                 | 0(0-0)                   | 189 | 0(0-1)                   | 185 | 2.23(2.19,2.27)    | 3.14(3.12,3.16)    | 2.87(2.84,2.89)    | 2.75(2.73,2.78)    | 63  |
| Senegal                               | 23(18-28)                | 107 | 54(43-66)                | 99  | 3.38(3.36,3.40)    | 2.93(2.89,2.97)    | 2.76(2.71,2.80)    | 3.02(3.00,3.04)    | 51  |
| Sierra Leone                          | 9(7-12)                  | 133 | 24(19-30)                | 126 | 1.52(1.19,1.85)    | 4.26(4.12,4.40)    | 3.80(3.75,3.84)    | 3.30(3.16,3.43)    | 36  |
| Togo                                  | 9(7-11)                  | 134 | 25(20-30)                | 125 | 3.76(3.70,3.81)    | 3.49(3.44,3.54)    | 2.99(2.96,3.03)    | 3.42(3.39,3.45)    | 30  |
| American Samoa                        | 0(0-0)                   | 197 | 0(0-0)                   | 196 | 2.25(2.17,2.33)    | 0.23(0.21,0.26)    | 0.53(0.49,0.57)    | 0.99(0.96,1.03)    | 148 |
| Bermuda                               | 0(0-1)                   | 177 | 0(0-1)                   | 188 | 0.77(0.69,0.85)    | 0.15(0.08,0.22)    | -0.59(-0.64,-0.54) | 0.11(0.07,0.15)    | 178 |
| Cook Islands                          | 0(0-0)                   | 199 | 0(0-0)                   | 199 | 0.56(0.51,0.61)    | 0.65(0.53,0.76)    | 0.27(0.19,0.34)    | 0.46(0.42,0.51)    | 166 |
| Greenland                             | 2(1-2)                   | 161 | 1(1-2)                   | 174 | -4.81(-4.96,-4.65) | 0.55(0.24,0.86)    | 1.87(1.38,2.37)    | -0.86(-1.05,-0.67) | 194 |
| Guam                                  | 0(0-0)                   | 191 | 0(0-0)                   | 191 | 1.64(1.57,1.71)    | 0.78(0.76,0.80)    | 0.72(0.71,0.74)    | 1.04(1.01,1.07)    | 144 |
| Monaco                                | 0(0-1)                   | 175 | 1(1-1)                   | 179 | 0.77(0.71,0.82)    | 0.81(0.79,0.83)    | 0.80(0.73,0.86)    | 0.79(0.76,0.82)    | 153 |
| Nauru                                 | 0(0-0)                   | 202 | 0(0-0)                   | 202 | 1.13(1.09,1.18)    | 0.00(-0.17,0.18)   | 0.10(-0.02,0.23)   | 0.41(0.34,0.48)    | 168 |
| Niue                                  | 0(0-0)                   | 203 | 0(0-0)                   | 203 | -0.86(-0.91,-0.81) | -1.62(-1.77,-1.47) | 0.69(0.66,0.73)    | -0.62(-0.68,-0.57) | 192 |
| Northern Mariana Islands              | 0(0-0)                   | 196 | 0(0-0)                   | 197 | 4.94(4.00,5.88)    | -3.28(-4.28,-2.28) | -2.12(-2.31,-1.92) | 0.08(-0.38,0.55)   | 180 |
| Palau                                 | 0(0-0)                   | 200 | 0(0-0)                   | 200 | 3.68(3.57,3.79)    | 0.01(-0.11,0.14)   | 0.06(-0.05,0.17)   | 1.16(1.09,1.24)    | 139 |
| Puerto Rico                           | 16(14-19)                | 121 | 19(16-22)                | 134 | 1.93(1.84,2.02)    | 0.23(0.18,0.28)    | -0.86(-0.98,-0.74) | 0.42(0.37,0.48)    | 167 |
| Saint Kitts and Nevis                 | 0(0-0)                   | 185 | 1(0-1)                   | 182 | 4.01(3.93,4.09)    | 2.42(2.04,2.81)    | 0.20(0.05,0.36)    | 2.21(2.07,2.35)    | 94  |
| San Marino                            | 0(0-0)                   | 183 | 0(0-1)                   | 186 | 1.03(0.88,1.18)    | 1.01(0.93,1.09)    | 1.46(1.39,1.53)    | 1.16(1.10,1.23)    | 138 |
| Tokelau                               | 0(0-0)                   | 204 | 0(0-0)                   | 204 | -0.32(-0.58,-0.06) | -2.12(-2.40,-1.83) | 1.30(1.21,1.40)    | -0.28(-0.43,-0.14) | 187 |
| Tuvalu                                | 0(0-0)                   | 201 | 0(0-0)                   | 201 | 0.42(0.37,0.46)    | 1.14(1.08,1.20)    | 1.38(1.37,1.40)    | 0.98(0.96,1.01)    | 149 |
| United States Virgin Islands          | 0(0-1)                   | 176 | 0(0-1)                   | 183 | 1.19(1.13,1.25)    | 0.10(-0.03,0.23)   | -0.52(-0.54,-0.49) | 0.24(0.20,0.29)    | 175 |
| South Sudan                           | 11(8-13)                 | 129 | 18(14-22)                | 135 | 1.93(1.86,2.00)    | 2.64(2.58,2.69)    | 0.60(0.26,0.95)    | 1.76(1.65,1.87)    | 116 |
| Sudan                                 | 131(103-160)             | 49  | 352(282-426)             | 34  | 3.74(3.63,3.86)    | 3.06(2.89,3.23)    | 3.63(3.49,3.76)    | 3.45(3.36,3.54)    | 29  |
| <b><i>Rheumatoid arthritis</i></b>    |                          |     |                          |     |                    |                    |                    |                    |     |
| China                                 | 125,073(112,795-138,598) | 1   | 222,509(198,118-247,768) | 2   | 2.49(2.48,2.50)    | 2.49(2.48,2.50)    | 0.93(0.70,1.17)    | 2.00(1.93,2.08)    | 127 |
| Democratic People's Republic of Korea | 2,232(1,979-2,522)       | 35  | 3,109(2,732-3,529)       | 44  | 1.11(0.99,1.23)    | 1.24(1.14,1.35)    | 1.06(0.97,1.15)    | 1.13(1.06,1.19)    | 168 |
| Taiwan (Province of China)            | 2,013(1,965-2,077)       | 40  | 3,459(3,410-3,508)       | 43  | 2.24(2.22,2.25)    | 2.14(2.12,2.15)    | 1.26(1.24,1.28)    | 1.88(1.87,1.89)    | 134 |
| Cambodia                              | 337(291-395)             | 103 | 832(729-962)             | 95  | 2.95(2.84,3.06)    | 3.50(3.41,3.59)    | 3.04(3.02,3.07)    | 3.17(3.11,3.22)    | 75  |
| Indonesia                             | 6,621(5,909-7,473)       | 15  | 11,396(10,134-12,825)    | 15  | 2.13(2.08,2.18)    | 1.86(1.82,1.89)    | 1.70(1.67,1.73)    | 1.89(1.87,1.92)    | 133 |
| Lao People's Democratic Republic      | 137(118-159)             | 131 | 337(293-394)             | 130 | 2.88(2.86,2.91)    | 3.42(3.37,3.46)    | 3.14(3.12,3.16)    | 3.15(3.13,3.16)    | 77  |
| Malaysia                              | 638(545-751)             | 71  | 1,576(1,340-1,856)       | 70  | 4.21(4.05,4.36)    | 2.98(2.84,3.12)    | 2.27(2.23,2.31)    | 3.17(3.10,3.25)    | 76  |
| Maldives                              | 8(7-9)                   | 178 | 31(26-37)                | 173 | 4.37(4.14,4.61)    | 5.50(5.38,5.62)    | 4.79(4.58,5.01)    | 4.94(4.81,5.06)    | 9   |
| Myanmar                               | 1,717(1,486-1,990)       | 44  | 3,502(3,095-3,992)       | 41  | 2.17(2.14,2.20)    | 2.65(2.64,2.67)    | 2.61(2.59,2.64)    | 2.49(2.47,2.50)    | 109 |
| Philippines                           | 2,983(2,668-3,336)       | 28  | 6,048(5,412-6,784)       | 29  | 2.88(2.81,2.96)    | 2.53(2.42,2.64)    | 2.07(1.80,2.35)    | 2.51(2.41,2.61)    | 107 |

|                                  |                    |     |                     |     |                    |                    |                    |                    |     |
|----------------------------------|--------------------|-----|---------------------|-----|--------------------|--------------------|--------------------|--------------------|-----|
| Sri Lanka                        | 662(563-784)       | 70  | 1,136(979-1,322)    | 82  | 1.77(1.69,1.84)    | 2.16(2.14,2.18)    | 1.70(1.66,1.74)    | 1.87(1.84,1.90)    | 135 |
| Thailand                         | 4,346(3,806-5,054) | 20  | 9,036(7,841-10,379) | 20  | 3.10(2.75,3.46)    | 3.57(3.47,3.66)    | 0.74(-0.36,1.84)   | 2.54(2.17,2.91)    | 104 |
| Timor-Leste                      | 25(21-30)          | 164 | 53(46-62)           | 166 | 1.92(1.87,1.97)    | 2.83(2.55,3.10)    | 3.07(2.97,3.18)    | 2.61(2.51,2.70)    | 100 |
| Viet Nam                         | 2,548(2,187-2,987) | 31  | 6,149(5,286-7,110)  | 28  | 3.19(3.16,3.23)    | 3.33(3.28,3.37)    | 2.73(2.70,2.76)    | 3.10(3.08,3.12)    | 79  |
| Fiji                             | 27(23-33)          | 162 | 38(32-45)           | 172 | 1.23(1.08,1.39)    | 1.03(0.97,1.08)    | 1.25(1.12,1.39)    | 1.17(1.10,1.25)    | 163 |
| Kiribati                         | 2(2-3)             | 196 | 4(3-5)              | 195 | 1.87(1.76,1.98)    | 2.41(2.35,2.46)    | 1.87(1.74,2.00)    | 2.04(1.98,2.11)    | 126 |
| Marshall Islands                 | 2(1-2)             | 198 | 3(2-3)              | 197 | 2.63(2.59,2.67)    | 1.58(1.56,1.60)    | 1.34(1.30,1.38)    | 1.83(1.81,1.85)    | 137 |
| Micronesia (Federated States of) | 4(3-4)             | 189 | 5(4-6)              | 191 | 1.99(1.93,2.05)    | 0.63(0.59,0.66)    | 0.55(0.51,0.59)    | 1.03(1.00,1.06)    | 172 |
| Papua New Guinea                 | 130(111-155)       | 135 | 353(302-415)        | 128 | 3.52(3.47,3.57)    | 3.44(3.38,3.49)    | 3.50(3.49,3.51)    | 3.49(3.47,3.52)    | 56  |
| Samoa                            | 6(5-8)             | 182 | 10(8-11)            | 184 | 1.69(1.54,1.85)    | 0.63(0.59,0.68)    | 1.91(1.82,2.01)    | 1.41(1.34,1.47)    | 153 |
| Solomon Islands                  | 13(11-15)          | 173 | 31(27-36)           | 174 | 4.20(4.04,4.36)    | 2.36(2.19,2.53)    | 2.54(2.45,2.62)    | 3.02(2.90,3.15)    | 82  |
| Tonga                            | 3(3-4)             | 190 | 4(4-5)              | 193 | 1.36(1.30,1.41)    | 0.55(0.49,0.60)    | 0.34(0.18,0.49)    | 0.74(0.68,0.80)    | 181 |
| Vanuatu                          | 5(4-6)             | 186 | 12(10-14)           | 180 | 3.16(3.09,3.24)    | 2.90(2.61,3.20)    | 2.56(2.48,2.64)    | 2.87(2.78,2.97)    | 87  |
| Armenia                          | 205(179-236)       | 119 | 277(243-315)        | 136 | 1.18(0.96,1.40)    | 1.04(0.96,1.13)    | 1.03(0.83,1.23)    | 1.09(0.98,1.19)    | 170 |
| Azerbaijan                       | 382(323-452)       | 97  | 794(674-931)        | 97  | 1.55(1.28,1.81)    | 3.09(2.64,3.53)    | 3.11(2.95,3.28)    | 2.60(2.42,2.77)    | 101 |
| Georgia                          | 411(346-477)       | 90  | 314(265-364)        | 133 | -1.56(-1.75,-1.36) | -1.17(-1.21,-1.13) | 0.06(-0.49,0.61)   | -0.91(-1.09,-0.73) | 204 |
| Kazakhstan                       | 2,702(2,466-2,987) | 30  | 4,822(4,374-5,335)  | 36  | -0.21(-0.33,-0.10) | 2.41(2.30,2.53)    | 3.92(3.82,4.02)    | 2.06(1.99,2.13)    | 125 |
| Kyrgyzstan                       | 536(475-603)       | 79  | 1,147(1,019-1,300)  | 81  | 1.98(1.88,2.09)    | 2.85(2.79,2.90)    | 3.13(3.09,3.17)    | 2.67(2.62,2.71)    | 98  |
| Mongolia                         | 124(107-145)       | 136 | 334(286-389)        | 131 | 2.58(2.41,2.75)    | 4.75(4.67,4.84)    | 3.06(2.97,3.14)    | 3.50(3.43,3.57)    | 53  |
| Tajikistan                       | 383(335-442)       | 95  | 962(838-1,117)      | 87  | 2.30(2.26,2.35)    | 3.72(3.69,3.76)    | 3.58(3.55,3.62)    | 3.22(3.19,3.25)    | 74  |
| Turkmenistan                     | 171(146-203)       | 123 | 355(308-409)        | 127 | 2.50(2.31,2.70)    | 2.39(2.21,2.57)    | 2.76(2.71,2.81)    | 2.58(2.49,2.67)    | 102 |
| Uzbekistan                       | 3,036(2,681-3,426) | 27  | 7,167(6,392-7,983)  | 24  | 3.08(3.04,3.12)    | 3.27(3.13,3.41)    | 2.64(2.42,2.85)    | 3.02(2.93,3.11)    | 81  |
| Albania                          | 185(158-215)       | 121 | 277(241-314)        | 137 | 1.95(1.63,2.27)    | 1.34(0.99,1.70)    | 1.17(1.03,1.32)    | 1.41(1.16,1.66)    | 151 |
| Bosnia and Herzegovina           | 490(436-544)       | 84  | 562(495-629)        | 110 | 0.31(0.01,0.62)    | 0.86(0.62,1.10)    | -0.15(-0.24,-0.06) | 0.47(0.33,0.61)    | 190 |
| Bulgaria                         | 576(497-658)       | 75  | 540(468-621)        | 113 | -0.74(-0.87,-0.61) | -0.07(-0.15,0.01)  | 0.30(0.12,0.48)    | -0.18(-0.27,-0.09) | 200 |
| Croatia                          | 589(522-661)       | 74  | 702(621-793)        | 101 | 0.52(0.49,0.55)    | 0.62(0.59,0.65)    | 0.65(0.45,0.85)    | 0.60(0.53,0.66)    | 186 |
| Czechia                          | 877(756-1,002)     | 62  | 1,178(1,009-1,355)  | 79  | 1.22(1.12,1.31)    | 0.95(0.82,1.07)    | 1.06(0.72,1.40)    | 1.07(0.95,1.19)    | 171 |
| Hungary                          | 1,222(1,113-1,340) | 50  | 1,389(1,256-1,532)  | 75  | 1.15(0.90,1.40)    | 0.59(0.49,0.68)    | -0.63(-0.84,-0.43) | 0.40(0.28,0.52)    | 192 |
| North Macedonia                  | 118(101-137)       | 138 | 181(155-208)        | 149 | 1.40(0.44,2.36)    | 1.56(1.49,1.64)    | 1.56(1.49,1.64)    | 1.51(1.21,1.82)    | 146 |
| Montenegro                       | 45(39-52)          | 155 | 60(52-69)           | 163 | 0.50(0.39,0.61)    | 1.24(1.21,1.27)    | 1.24(1.21,1.27)    | 1.01(0.97,1.05)    | 173 |
| Poland                           | 7,830(7,005-8,682) | 13  | 7,813(6,942-8,685)  | 22  | 1.29(1.17,1.41)    | 0.86(0.72,1.00)    | -2.09(-3.16,-1.02) | 0.06(-0.29,0.41)   | 197 |
| Romania                          | 1,479(1,258-1,712) | 48  | 1,691(1,440-1,943)  | 65  | 0.67(0.50,0.84)    | 0.24(0.18,0.30)    | 0.53(0.39,0.66)    | 0.49(0.41,0.57)    | 189 |
| Serbia                           | 717(655-783)       | 68  | 928(817-1,040)      | 92  | 0.47(0.36,0.59)    | 0.63(0.49,0.77)    | 1.73(1.32,2.15)    | 0.92(0.76,1.08)    | 175 |
| Slovakia                         | 332(287-382)       | 104 | 473(406-542)        | 117 | 1.42(1.36,1.49)    | 1.11(1.07,1.16)    | 1.21(0.87,1.55)    | 1.25(1.14,1.36)    | 160 |
| Slovenia                         | 280(248-316)       | 111 | 434(384-488)        | 119 | 1.53(1.49,1.57)    | 2.08(2.04,2.12)    | 0.91(0.79,1.04)    | 1.53(1.48,1.57)    | 144 |
| Belarus                          | 530(455-615)       | 80  | 655(564-759)        | 102 | 0.28(0.10,0.46)    | 0.80(0.73,0.88)    | 1.20(1.12,1.29)    | 0.77(0.70,0.85)    | 179 |
| Estonia                          | 241(219-261)       | 112 | 257(235-279)        | 141 | -0.60(-0.78,-0.42) | 1.42(1.31,1.54)    | -0.45(-0.66,-0.23) | 0.20(0.09,0.31)    | 194 |
| Latvia                           | 359(322-398)       | 100 | 316(285-350)        | 132 | -0.83(-0.98,-0.68) | 0.35(0.24,0.46)    | -0.96(-1.06,-0.86) | -0.41(-0.49,-0.34) | 203 |



|                          |                       |     |                        |     |                  |                    |                    |                    |     |
|--------------------------|-----------------------|-----|------------------------|-----|------------------|--------------------|--------------------|--------------------|-----|
| Lithuania                | 519(475-571)          | 82  | 472(425-519)           | 118 | 0.47(0.30,0.64)  | -0.49(-0.55,-0.42) | -1.13(-1.23,-1.04) | -0.31(-0.39,-0.24) | 202 |
| Republic of Moldova      | 233(202-269)          | 114 | 261(226-300)           | 140 | 0.09(-0.08,0.26) | 0.29(0.21,0.36)    | 0.88(0.79,0.97)    | 0.43(0.36,0.50)    | 191 |
| Russian Federation       | 12,644(11,333-14,137) | 9   | 13,117(11,729-14,661)  | 10  | 0.57(0.56,0.59)  | 0.02(0.00,0.04)    | -0.26(-0.29,-0.22) | 0.12(0.11,0.13)    | 196 |
| Ukraine                  | 2,900(2,577-3,246)    | 29  | 2,691(2,382-3,046)     | 48  | 0.11(0.00,0.22)  | -0.41(-0.49,-0.33) | -0.40(-0.81,0.01)  | -0.25(-0.38,-0.11) | 201 |
| Brunei Darussalam        | 18(16-22)             | 171 | 50(44-58)              | 168 | 4.58(4.50,4.65)  | 3.47(3.31,3.62)    | 2.38(2.29,2.47)    | 3.49(3.42,3.55)    | 54  |
| Japan                    | 24,652(22,071-27,440) | 4   | 26,450(23,575-29,571)  | 8   | 1.08(0.90,1.26)  | 0.73(0.57,0.89)    | -1.41(-1.78,-1.03) | 0.18(0.02,0.34)    | 195 |
| Republic of Korea        | 4,503(4,065-5,000)    | 19  | 10,055(9,083-11,055)   | 18  | 3.15(3.10,3.20)  | 3.05(2.99,3.11)    | 2.03(1.88,2.18)    | 2.76(2.70,2.83)    | 94  |
| Singapore                | 222(189-261)          | 117 | 599(505-697)           | 107 | 4.03(3.85,4.22)  | 3.82(2.96,4.69)    | 2.64(2.40,2.89)    | 3.57(3.28,3.86)    | 45  |
| Australia                | 3,399(3,062-3,788)    | 24  | 6,609(5,898-7,383)     | 25  | 2.68(2.47,2.89)  | 2.96(2.83,3.09)    | 1.06(0.80,1.32)    | 2.27(2.14,2.40)    | 121 |
| New Zealand              | 848(754-949)          | 63  | 1,360(1,206-1,515)     | 76  | 1.73(1.61,1.86)  | 2.25(2.21,2.30)    | 0.84(0.67,1.00)    | 1.63(1.56,1.70)    | 141 |
| Andorra                  | 9(8-10)               | 175 | 19(16-22)              | 177 | 3.57(3.39,3.75)  | 3.57(3.39,3.75)    | 0.88(-0.53,2.30)   | 2.50(1.86,3.15)    | 108 |
| Austria                  | 1,096(986-1,219)      | 57  | 1,445(1,297-1,605)     | 73  | 1.32(1.02,1.62)  | 1.37(1.22,1.52)    | -0.05(-0.33,0.23)  | 0.92(0.76,1.07)    | 176 |
| Belgium                  | 1,542(1,390-1,707)    | 46  | 2,144(1,926-2,384)     | 55  | 1.21(1.11,1.31)  | 1.43(1.40,1.46)    | 0.68(0.58,0.78)    | 1.13(1.08,1.18)    | 166 |
| Cyprus                   | 140(125-157)          | 130 | 368(328-417)           | 122 | 3.14(3.04,3.23)  | 4.54(4.43,4.64)    | 2.37(2.09,2.66)    | 3.38(3.28,3.48)    | 64  |
| Denmark                  | 1,176(1,082-1,287)    | 53  | 1,778(1,618-1,960)     | 63  | 1.01(0.93,1.08)  | 1.87(1.82,1.92)    | 1.44(1.38,1.50)    | 1.46(1.42,1.50)    | 148 |
| Finland                  | 1,534(1,421-1,660)    | 47  | 2,238(2,055-2,440)     | 53  | 2.21(2.13,2.30)  | 2.21(2.13,2.30)    | -0.55(-1.05,-0.06) | 1.30(1.12,1.49)    | 158 |
| France                   | 7,696(6,950-8,538)    | 14  | 11,644(10,370-13,077)  | 14  | 1.59(1.52,1.65)  | 1.87(1.81,1.94)    | 0.75(0.65,0.85)    | 1.43(1.38,1.47)    | 149 |
| Germany                  | 10,581(9,466-11,815)  | 10  | 13,103(11,573-14,682)  | 11  | 1.49(1.42,1.56)  | 0.87(0.80,0.94)    | -0.31(-0.48,-0.15) | 0.70(0.63,0.77)    | 182 |
| Greece                   | 1,211(1,078-1,350)    | 51  | 1,423(1,262-1,615)     | 74  | 1.28(1.21,1.35)  | 0.65(0.45,0.85)    | 0.00(-0.25,0.25)   | 0.62(0.51,0.73)    | 185 |
| Iceland                  | 32(28-36)             | 161 | 54(48-60)              | 165 | 2.15(2.05,2.26)  | 2.41(2.35,2.47)    | 0.87(0.74,1.01)    | 1.81(1.75,1.88)    | 139 |
| Ireland                  | 923(839-1,007)        | 60  | 1,895(1,697-2,099)     | 61  | 2.51(2.27,2.75)  | 3.67(3.50,3.84)    | 1.07(0.68,1.46)    | 2.47(2.30,2.65)    | 110 |
| Israel                   | 457(403-523)          | 88  | 1,097(967-1,255)       | 83  | 3.48(3.44,3.52)  | 3.09(2.97,3.22)    | 2.69(2.58,2.80)    | 3.08(3.02,3.14)    | 80  |
| Italy                    | 10,212(9,159-11,376)  | 11  | 12,477(11,196-13,935)  | 12  | 0.58(0.55,0.61)  | 0.86(0.84,0.89)    | 0.64(0.62,0.66)    | 0.70(0.69,0.72)    | 183 |
| Luxembourg               | 48(43-54)             | 154 | 94(83-106)             | 159 | 2.13(2.03,2.23)  | 2.51(2.49,2.53)    | 2.16(2.05,2.27)    | 2.28(2.24,2.33)    | 120 |
| Malta                    | 42(37-48)             | 157 | 63(57-70)              | 161 | 2.21(2.17,2.25)  | 1.69(1.65,1.72)    | 0.34(0.08,0.61)    | 1.43(1.35,1.52)    | 150 |
| Netherlands              | 3,683(3,336-4,094)    | 23  | 5,101(4,580-5,703)     | 35  | 1.62(1.53,1.72)  | 2.26(2.23,2.30)    | -0.77(-1.12,-0.41) | 1.11(1.00,1.23)    | 169 |
| Norway                   | 1,156(1,031-1,289)    | 55  | 1,612(1,430-1,802)     | 67  | 0.26(0.09,0.43)  | 1.89(1.81,1.97)    | 1.19(0.48,1.91)    | 1.17(0.93,1.40)    | 164 |
| Portugal                 | 1,095(992-1,215)      | 58  | 1,642(1,472-1,821)     | 66  | 2.12(2.09,2.15)  | 1.67(1.63,1.71)    | 0.36(0.26,0.46)    | 1.40(1.36,1.44)    | 154 |
| Spain                    | 4,974(4,611-5,384)    | 18  | 8,040(7,400-8,693)     | 21  | 2.01(1.97,2.04)  | 2.37(2.36,2.39)    | 0.62(0.56,0.68)    | 1.67(1.64,1.70)    | 140 |
| Sweden                   | 2,370(2,191-2,572)    | 33  | 3,079(2,828-3,345)     | 45  | 0.66(0.62,0.70)  | 0.89(0.87,0.90)    | 1.12(1.07,1.18)    | 0.90(0.88,0.93)    | 177 |
| Switzerland              | 1,374(1,230-1,535)    | 49  | 2,139(1,921-2,406)     | 56  | 1.58(1.53,1.63)  | 1.79(1.78,1.81)    | 1.17(0.99,1.36)    | 1.53(1.47,1.59)    | 145 |
| United Kingdom           | 17,971(16,307-19,800) | 5   | 21,101(19,159-23,236)  | 9   | 0.46(0.24,0.68)  | 1.02(0.95,1.09)    | -0.04(-0.28,0.21)  | 0.52(0.41,0.63)    | 188 |
| Argentina                | 3,135(2,779-3,554)    | 26  | 5,588(5,005-6,263)     | 33  | 2.51(2.36,2.66)  | 2.10(2.03,2.16)    | 1.28(1.09,1.47)    | 1.97(1.89,2.05)    | 129 |
| Chile                    | 1,741(1,551-1,966)    | 43  | 4,569(4,123-5,066)     | 40  | 4.13(4.11,4.16)  | 3.53(3.44,3.62)    | 2.52(2.47,2.57)    | 3.40(3.36,3.43)    | 63  |
| Uruguay                  | 339(302-380)          | 102 | 509(455-571)           | 114 | 1.65(1.56,1.74)  | 1.31(1.26,1.37)    | 1.18(1.15,1.22)    | 1.40(1.36,1.43)    | 155 |
| Canada                   | 5,388(5,155-5,605)    | 17  | 11,667(11,143-12,147)  | 13  | 3.58(3.43,3.74)  | 2.51(2.47,2.56)    | 2.06(2.03,2.08)    | 2.71(2.65,2.76)    | 97  |
| United States of America | 51,420(47,776-55,594) | 3   | 92,848(85,088-101,348) | 3   | 1.89(1.85,1.93)  | 2.59(2.57,2.61)    | 1.67(1.61,1.74)    | 2.07(2.04,2.09)    | 124 |
| Antigua and Barbuda      | 6(5-7)                | 184 | 12(10-13)              | 178 | 3.47(3.28,3.66)  | 2.63(2.41,2.86)    | 1.47(1.39,1.54)    | 2.53(2.43,2.63)    | 106 |

|                                    |                       |     |                       |     |                 |                 |                 |                 |     |
|------------------------------------|-----------------------|-----|-----------------------|-----|-----------------|-----------------|-----------------|-----------------|-----|
| Bahamas                            | 23(20-27)             | 166 | 47(41-54)             | 170 | 3.32(3.21,3.42) | 2.54(2.46,2.61) | 1.43(1.38,1.48) | 2.43(2.38,2.47) | 112 |
| Barbados                           | 34(31-39)             | 160 | 55(49-61)             | 164 | 1.51(1.46,1.55) | 2.06(2.01,2.11) | 1.19(1.02,1.37) | 1.60(1.54,1.66) | 142 |
| Belize                             | 14(12-16)             | 172 | 47(40-54)             | 169 | 4.37(4.29,4.45) | 4.97(4.55,5.39) | 3.69(3.60,3.78) | 4.32(4.19,4.46) | 18  |
| Cuba                               | 1,101(951-1,268)      | 56  | 1,610(1,418-1,818)    | 68  | 2.04(2.03,2.06) | 1.39(1.28,1.49) | 0.55(0.53,0.56) | 1.32(1.29,1.35) | 157 |
| Dominica                           | 7(6-8)                | 179 | 9(8-10)               | 186 | 1.01(0.98,1.05) | 0.56(0.52,0.60) | 0.31(0.26,0.36) | 0.63(0.60,0.65) | 184 |
| Dominican Republic                 | 398(332-474)          | 92  | 878(751-1,041)        | 93  | 3.43(3.41,3.45) | 2.89(2.86,2.92) | 2.02(1.98,2.07) | 2.77(2.75,2.78) | 93  |
| Grenada                            | 5(4-6)                | 187 | 9(8-10)               | 185 | 3.66(3.21,4.10) | 1.64(1.54,1.74) | 0.93(0.66,1.19) | 2.08(1.91,2.25) | 123 |
| Guyana                             | 43(36-51)             | 156 | 60(52-70)             | 162 | 1.10(0.95,1.26) | 0.65(0.58,0.72) | 2.03(1.84,2.21) | 1.22(1.13,1.30) | 161 |
| Haiti                              | 452(393-517)          | 89  | 1,237(1,080-1,417)    | 78  | 3.78(3.65,3.91) | 3.74(3.57,3.91) | 3.11(3.04,3.18) | 3.55(3.47,3.63) | 47  |
| Jamaica                            | 160(137-187)          | 127 | 276(240-319)          | 138 | 2.58(2.53,2.62) | 2.02(1.98,2.07) | 1.24(1.09,1.39) | 1.93(1.87,1.99) | 132 |
| Saint Lucia                        | 12(10-13)             | 174 | 25(23-28)             | 175 | 3.78(3.75,3.81) | 2.77(2.73,2.80) | 1.64(1.58,1.70) | 2.73(2.71,2.76) | 95  |
| Saint Vincent and the Grenadines   | 7(6-8)                | 180 | 10(9-12)              | 182 | 1.40(1.34,1.46) | 1.65(1.60,1.69) | 1.21(1.13,1.30) | 1.41(1.37,1.45) | 152 |
| Suriname                           | 22(19-26)             | 169 | 46(39-53)             | 171 | 2.40(2.19,2.61) | 3.08(2.99,3.17) | 2.11(2.03,2.19) | 2.55(2.46,2.64) | 103 |
| Trinidad and Tobago                | 132(117-150)          | 132 | 232(208-259)          | 145 | 2.61(2.58,2.64) | 2.27(2.13,2.41) | 1.03(0.91,1.14) | 1.97(1.91,2.03) | 128 |
| Bolivia (Plurinational State of)   | 488(430-558)          | 86  | 1,564(1,397-1,779)    | 71  | 4.57(4.41,4.73) | 4.39(4.27,4.52) | 3.30(3.22,3.37) | 4.09(4.01,4.16) | 24  |
| Ecuador                            | 965(852-1,100)        | 59  | 3,060(2,733-3,459)    | 46  | 5.20(5.14,5.25) | 3.67(3.58,3.76) | 3.38(3.34,3.43) | 4.06(4.02,4.09) | 26  |
| Peru                               | 1,585(1,363-1,855)    | 45  | 4,594(4,032-5,279)    | 39  | 3.86(3.48,4.24) | 3.77(3.68,3.85) | 3.66(3.59,3.74) | 3.79(3.64,3.94) | 33  |
| Colombia                           | 3,147(2,744-3,615)    | 25  | 7,175(6,431-8,026)    | 23  | 4.21(4.15,4.27) | 2.83(2.79,2.86) | 1.44(1.21,1.66) | 2.87(2.79,2.94) | 86  |
| Costa Rica                         | 396(350-452)          | 93  | 1,093(979-1,219)      | 84  | 4.62(4.57,4.68) | 3.59(3.47,3.71) | 2.58(2.52,2.63) | 3.59(3.55,3.64) | 42  |
| El Salvador                        | 379(327-443)          | 98  | 741(647-852)          | 100 | 2.89(2.79,2.99) | 2.34(2.29,2.38) | 1.71(1.63,1.78) | 2.34(2.29,2.38) | 116 |
| Guatemala                          | 570(498-660)          | 76  | 2,271(1,998-2,612)    | 51  | 5.51(5.31,5.70) | 4.98(4.84,5.13) | 4.14(4.06,4.22) | 4.88(4.80,4.97) | 11  |
| Honduras                           | 594(530-669)          | 73  | 2,092(1,878-2,331)    | 59  | 4.74(4.60,4.88) | 4.68(4.63,4.73) | 3.81(3.73,3.88) | 4.42(4.36,4.48) | 16  |
| Mexico                             | 16,228(14,706-17,906) | 7   | 32,459(29,222-35,828) | 4   | 2.94(2.76,3.13) | 2.03(1.61,2.46) | 2.29(2.19,2.40) | 2.42(2.27,2.57) | 114 |
| Nicaragua                          | 318(276-371)          | 106 | 941(826-1,071)        | 90  | 4.33(4.17,4.49) | 3.96(3.92,4.01) | 3.00(2.92,3.08) | 3.80(3.73,3.87) | 32  |
| Panama                             | 239(211-273)          | 113 | 605(537-684)          | 106 | 3.64(3.60,3.67) | 2.92(2.85,2.98) | 3.16(3.10,3.22) | 3.25(3.22,3.28) | 73  |
| Venezuela (Bolivarian Republic of) | 2,445(2,286-2,615)    | 32  | 6,421(5,986-6,839)    | 26  | 4.25(4.11,4.38) | 3.52(3.40,3.64) | 2.23(2.07,2.40) | 3.35(3.26,3.43) | 68  |
| Brazil                             | 16,562(14,840-18,555) | 6   | 27,907(24,836-31,327) | 7   | 2.37(2.32,2.43) | 1.72(1.61,1.84) | 1.43(1.40,1.46) | 1.85(1.81,1.89) | 136 |
| Paraguay                           | 332(285-390)          | 105 | 953(826-1,093)        | 89  | 4.50(4.23,4.76) | 3.21(3.16,3.26) | 3.56(3.45,3.67) | 3.72(3.63,3.81) | 37  |
| Algeria                            | 834(709-979)          | 64  | 2,294(1,983-2,670)    | 50  | 3.59(3.46,3.71) | 3.59(3.53,3.65) | 3.58(3.45,3.70) | 3.58(3.51,3.64) | 44  |
| Bahrain                            | 27(23-33)             | 163 | 155(132-182)          | 153 | 4.51(4.33,4.69) | 9.33(9.16,9.51) | 4.59(4.47,4.71) | 6.26(6.15,6.37) | 3   |
| Egypt                              | 1,847(1,557-2,205)    | 41  | 4,763(4,071-5,605)    | 37  | 3.53(3.36,3.71) | 3.00(2.95,3.06) | 3.49(3.34,3.64) | 3.35(3.26,3.43) | 67  |
| Iran (Islamic Republic of)         | 2,314(2,071-2,597)    | 34  | 4,684(4,128-5,303)    | 38  | 2.97(2.72,3.23) | 2.57(2.50,2.63) | 1.81(1.74,1.88) | 2.46(2.37,2.56) | 111 |
| Iraq                               | 568(483-680)          | 77  | 2,057(1,767-2,419)    | 60  | 4.33(4.25,4.42) | 4.46(4.32,4.61) | 4.65(4.30,4.99) | 4.51(4.33,4.69) | 14  |
| Jordan                             | 118(98-144)           | 137 | 586(499-693)          | 108 | 3.65(3.53,3.78) | 6.23(6.14,6.32) | 7.16(6.68,7.64) | 5.66(5.50,5.83) | 4   |
| Kuwait                             | 77(64-95)             | 145 | 307(254-373)          | 134 | 1.14(0.93,1.34) | 6.20(6.11,6.29) | 7.30(7.11,7.48) | 4.92(4.82,5.02) | 10  |
| Lebanon                            | 115(98-135)           | 139 | 289(246-341)          | 135 | 2.53(2.42,2.65) | 3.12(3.08,3.17) | 4.17(3.84,4.51) | 3.26(3.15,3.37) | 71  |
| Libya                              | 131(109-157)          | 134 | 356(297-426)          | 126 | 3.48(3.35,3.60) | 4.44(4.37,4.50) | 2.72(2.64,2.81) | 3.54(3.49,3.60) | 48  |
| Morocco                            | 783(663-925)          | 66  | 1,717(1,475-2,013)    | 64  | 2.68(2.60,2.77) | 2.70(2.65,2.75) | 2.92(2.83,3.00) | 2.77(2.72,2.82) | 92  |

|                                  |                        |     |                          |     |                  |                    |                    |                 |     |
|----------------------------------|------------------------|-----|--------------------------|-----|------------------|--------------------|--------------------|-----------------|-----|
| Palestine                        | 63(53-75)              | 149 | 222(190-264)             | 146 | 4.68(4.62,4.75)  | 4.62(4.55,4.70)    | 4.04(4.00,4.09)    | 4.46(4.42,4.50) | 15  |
| Oman                             | 57(48-69)              | 150 | 239(199-295)             | 144 | 4.21(3.82,4.60)  | 3.53(3.20,3.86)    | 7.21(6.33,8.09)    | 5.15(4.78,5.52) | 8   |
| Qatar                            | 19(15-23)              | 170 | 185(151-233)             | 147 | 4.29(4.08,4.50)  | 12.66(12.37,12.95) | 7.51(7.29,7.73)    | 8.32(8.16,8.48) | 1   |
| Saudi Arabia                     | 488(404-593)           | 85  | 2,111(1,757-2,575)       | 58  | 4.60(4.50,4.70)  | 5.23(5.20,5.25)    | 5.74(5.61,5.87)    | 5.18(5.13,5.24) | 7   |
| Syrian Arab Republic             | 382(319-458)           | 96  | 741(628-871)             | 99  | 4.43(4.33,4.54)  | 4.20(3.58,4.82)    | -1.76(-2.31,-1.21) | 2.36(2.03,2.70) | 115 |
| Tunisia                          | 287(243-341)           | 108 | 633(541-737)             | 103 | 3.08(2.89,3.27)  | 2.74(2.67,2.81)    | 2.45(2.40,2.50)    | 2.77(2.69,2.84) | 91  |
| Turkey                           | 4,128(3,709-4,604)     | 21  | 10,701(9,656-11,831)     | 17  | 3.45(3.36,3.53)  | 3.86(3.79,3.93)    | 2.59(2.49,2.69)    | 3.33(3.28,3.39) | 69  |
| United Arab Emirates             | 70(58-87)              | 146 | 571(455-718)             | 109 | 7.08(7.02,7.14)  | 12.04(11.68,12.41) | 4.06(3.93,4.19)    | 7.53(7.41,7.65) | 2   |
| Yemen                            | 314(265-378)           | 107 | 1,019(865-1,212)         | 86  | 3.85(3.80,3.91)  | 4.44(4.42,4.46)    | 4.09(3.94,4.25)    | 4.15(4.10,4.20) | 20  |
| Afghanistan                      | 355(307-416)           | 101 | 1,338(1,138-1,586)       | 77  | 4.59(3.49,5.71)  | 5.04(4.94,5.13)    | 5.04(4.94,5.13)    | 4.76(4.34,5.18) | 12  |
| Bangladesh                       | 9,631(8,558-10,937)    | 12  | 30,926(27,483-34,943)    | 6   | 3.10(3.00,3.20)  | 4.63(4.57,4.70)    | 4.49(4.40,4.58)    | 4.10(4.04,4.15) | 23  |
| Bhutan                           | 52(46-60)              | 153 | 139(124-158)             | 155 | 2.88(2.53,3.24)  | 4.17(4.11,4.23)    | 3.17(2.94,3.40)    | 3.46(3.32,3.59) | 57  |
| India                            | 95,123(85,809-104,899) | 2   | 222,904(201,191-246,448) | 1   | 2.99(2.94,3.04)  | 3.00(2.98,3.02)    | 2.91(2.86,2.97)    | 2.97(2.94,3.00) | 83  |
| Nepal                            | 1,794(1,592-2,020)     | 42  | 5,413(4,853-6,031)       | 34  | 3.71(3.62,3.79)  | 4.09(4.05,4.13)    | 3.80(3.71,3.88)    | 3.88(3.84,3.93) | 31  |
| Pakistan                         | 14,547(13,314-15,947)  | 8   | 31,583(28,656-34,669)    | 5   | 1.94(1.88,2.01)  | 2.79(2.75,2.83)    | 3.46(3.39,3.53)    | 2.73(2.70,2.77) | 96  |
| Angola                           | 618(547-709)           | 72  | 2,263(1,997-2,608)       | 52  | 3.74(3.46,4.02)  | 5.29(5.21,5.37)    | 4.51(4.33,4.70)    | 4.53(4.41,4.66) | 13  |
| Central African Republic         | 181(160-207)           | 122 | 375(332-426)             | 121 | 2.57(2.49,2.65)  | 3.10(3.07,3.14)    | 1.82(1.64,2.00)    | 2.54(2.47,2.60) | 105 |
| Congo                            | 157(140-179)           | 128 | 503(440-576)             | 115 | 3.08(2.96,3.20)  | 5.19(4.92,5.47)    | 4.02(3.81,4.22)    | 4.08(3.96,4.20) | 25  |
| Democratic Republic of the Congo | 2,173(1,916-2,484)     | 36  | 5,912(5,183-6,752)       | 30  | 2.81(2.69,2.93)  | 3.65(3.56,3.74)    | 3.99(3.87,4.11)    | 3.49(3.43,3.56) | 55  |
| Equatorial Guinea                | 23(21-26)              | 167 | 111(97-128)              | 157 | 4.53(4.30,4.75)  | 6.88(6.73,7.03)    | 4.80(4.51,5.09)    | 5.49(5.34,5.63) | 5   |
| Gabon                            | 68(61-77)              | 147 | 184(163-211)             | 148 | 2.94(2.80,3.09)  | 3.80(3.70,3.90)    | 3.50(3.36,3.65)    | 3.44(3.35,3.52) | 61  |
| Burundi                          | 402(359-451)           | 91  | 1,047(935-1,180)         | 85  | 1.87(1.50,2.24)  | 4.97(4.75,5.19)    | 3.30(3.14,3.47)    | 3.36(3.19,3.53) | 66  |
| Comoros                          | 40(36-44)              | 158 | 106(95-118)              | 158 | 2.76(2.65,2.87)  | 4.06(3.98,4.14)    | 3.33(3.25,3.41)    | 3.41(3.35,3.47) | 62  |
| Djibouti                         | 38(34-44)              | 159 | 180(159-204)             | 150 | 4.39(4.07,4.71)  | 6.24(6.20,6.28)    | 5.58(5.46,5.70)    | 5.46(5.35,5.57) | 6   |
| Eritrea                          | 223(200-250)           | 116 | 743(661-840)             | 98  | 4.20(3.96,4.43)  | 4.86(3.93,5.80)    | 3.90(3.78,4.02)    | 4.30(4.00,4.60) | 19  |
| Ethiopia                         | 4,084(3,666-4,532)     | 22  | 9,327(8,370-10,359)      | 19  | 2.57(2.44,2.70)  | 2.65(2.56,2.75)    | 3.31(3.13,3.49)    | 2.86(2.77,2.95) | 88  |
| Kenya                            | 2,098(1,900-2,324)     | 39  | 5,880(5,272-6,551)       | 32  | 3.36(3.35,3.37)  | 3.57(3.56,3.59)    | 3.94(3.86,4.01)    | 3.62(3.60,3.64) | 41  |
| Madagascar                       | 913(816-1,021)         | 61  | 2,609(2,330-2,961)       | 49  | 2.99(2.78,3.21)  | 4.28(4.01,4.55)    | 3.66(3.60,3.71)    | 3.65(3.53,3.76) | 40  |
| Malawi                           | 797(713-895)           | 65  | 1,848(1,656-2,074)       | 62  | 1.32(1.19,1.45)  | 2.96(2.87,3.05)    | 4.37(4.21,4.54)    | 2.90(2.81,2.99) | 85  |
| Mauritius                        | 64(55-76)              | 148 | 116(100-134)             | 156 | 3.02(2.91,3.14)  | 1.78(1.73,1.82)    | 1.59(1.55,1.62)    | 2.10(2.06,2.14) | 122 |
| Mozambique                       | 1,165(1,046-1,302)     | 54  | 2,854(2,554-3,220)       | 47  | 2.81(2.63,2.99)  | 3.27(3.25,3.29)    | 3.31(2.97,3.66)    | 3.14(3.02,3.26) | 78  |
| Rwanda                           | 554(495-619)           | 78  | 1,589(1,416-1,789)       | 69  | 0.38(-2.16,2.98) | 5.32(4.97,5.66)    | 4.33(3.47,5.20)    | 3.46(2.58,4.34) | 58  |
| Seychelles                       | 3(2-3)                 | 194 | 5(4-6)                   | 190 | 2.25(2.14,2.37)  | 2.46(2.39,2.54)    | 2.20(2.07,2.32)    | 2.31(2.24,2.38) | 118 |
| Somalia                          | 775(683-870)           | 67  | 2,126(1,872-2,400)       | 57  | 3.40(3.23,3.56)  | 3.35(3.23,3.46)    | 3.92(3.80,4.03)    | 3.53(3.45,3.62) | 50  |
| United Republic of Tanzania      | 2,169(1,926-2,440)     | 37  | 6,169(5,481-6,963)       | 27  | 3.04(2.97,3.12)  | 3.88(3.83,3.94)    | 4.06(3.93,4.19)    | 3.67(3.62,3.73) | 38  |
| Uganda                           | 1,201(1,073-1,349)     | 52  | 3,461(3,091-3,935)       | 42  | 2.29(1.94,2.65)  | 4.28(4.22,4.33)    | 4.50(4.17,4.84)    | 3.73(3.57,3.88) | 36  |
| Zambia                           | 677(610-760)           | 69  | 2,179(1,960-2,438)       | 54  | 1.65(1.44,1.85)  | 4.57(4.38,4.75)    | 6.10(6.00,6.20)    | 4.11(4.00,4.22) | 21  |
| Botswana                         | 114(101-130)           | 140 | 363(318-416)             | 124 | 4.59(4.40,4.79)  | 3.41(3.22,3.61)    | 4.00(3.73,4.27)    | 3.99(3.85,4.13) | 29  |

|                          |                    |     |                      |     |                    |                    |                    |                    |     |
|--------------------------|--------------------|-----|----------------------|-----|--------------------|--------------------|--------------------|--------------------|-----|
| Lesotho                  | 171(152-192)       | 124 | 264(232-302)         | 139 | 1.48(1.34,1.63)    | 0.79(0.72,0.85)    | 2.27(2.20,2.35)    | 1.50(1.44,1.56)    | 147 |
| Namibia                  | 132(117-150)       | 133 | 343(305-387)         | 129 | 3.55(3.41,3.70)    | 3.03(2.87,3.19)    | 3.34(3.14,3.54)    | 3.33(3.22,3.43)    | 70  |
| South Africa             | 6,276(5,652-6,962) | 16  | 11,129(9,972-12,452) | 16  | 2.57(2.45,2.68)    | 2.01(1.93,2.08)    | 1.22(1.05,1.40)    | 1.96(1.88,2.03)    | 130 |
| Eswatini                 | 78(69-89)          | 144 | 156(139-177)         | 151 | 3.54(3.10,3.98)    | 1.14(0.98,1.30)    | 2.74(2.61,2.86)    | 2.42(2.27,2.58)    | 113 |
| Zimbabwe                 | 519(450-606)       | 83  | 877(757-1,025)       | 94  | 1.66(1.53,1.79)    | 0.47(0.34,0.59)    | 3.56(3.44,3.67)    | 1.82(1.73,1.91)    | 138 |
| Benin                    | 113(98-131)        | 141 | 356(308-417)         | 125 | 3.80(3.78,3.83)    | 4.16(4.10,4.22)    | 4.21(4.16,4.26)    | 4.04(4.02,4.07)    | 27  |
| Burkina Faso             | 230(201-265)       | 115 | 629(543-732)         | 104 | 2.87(2.81,2.93)    | 3.86(3.80,3.92)    | 3.84(3.74,3.94)    | 3.54(3.50,3.59)    | 49  |
| Cameroon                 | 282(243-328)       | 110 | 960(832-1,124)       | 88  | 3.87(3.78,3.97)    | 4.39(4.28,4.51)    | 4.74(4.63,4.85)    | 4.33(4.26,4.40)    | 17  |
| Cabo Verde               | 8(7-9)             | 177 | 22(19-26)            | 176 | 3.26(3.19,3.34)    | 3.40(3.37,3.43)    | 3.84(3.79,3.89)    | 3.51(3.48,3.54)    | 52  |
| Chad                     | 144(125-166)       | 129 | 383(332-442)         | 120 | 2.65(2.63,2.68)    | 3.47(3.44,3.50)    | 4.30(4.22,4.37)    | 3.45(3.42,3.47)    | 59  |
| Cote d'Ivoire            | 287(245-336)       | 109 | 816(699-959)         | 96  | 4.30(4.26,4.35)    | 3.28(3.24,3.32)    | 3.53(3.45,3.61)    | 3.66(3.63,3.70)    | 39  |
| Gambia                   | 23(19-27)          | 168 | 66(58-78)            | 160 | 4.28(4.24,4.31)    | 3.50(3.48,3.52)    | 3.59(3.56,3.63)    | 3.77(3.75,3.79)    | 35  |
| Ghana                    | 370(317-437)       | 99  | 1,152(988-1,355)     | 80  | 4.07(4.02,4.13)    | 3.65(3.60,3.70)    | 4.36(4.22,4.50)    | 4.01(3.95,4.06)    | 28  |
| Guinea                   | 170(148-194)       | 126 | 365(316-426)         | 123 | 2.95(2.83,3.07)    | 2.19(2.15,2.23)    | 2.90(2.76,3.04)    | 2.64(2.58,2.71)    | 99  |
| Guinea-Bissau            | 24(21-28)          | 165 | 53(46-62)            | 167 | 2.21(2.20,2.23)    | 2.92(2.89,2.94)    | 3.31(3.28,3.35)    | 2.80(2.78,2.82)    | 90  |
| Liberia                  | 56(49-64)          | 152 | 155(133-184)         | 152 | 2.70(2.37,3.02)    | 4.29(3.94,4.64)    | 3.57(3.36,3.78)    | 3.52(3.35,3.70)    | 51  |
| Mali                     | 220(191-253)       | 118 | 611(528-712)         | 105 | 2.98(2.89,3.07)    | 3.77(3.67,3.87)    | 4.00(3.88,4.11)    | 3.59(3.52,3.66)    | 43  |
| Mauritania               | 57(50-65)          | 151 | 151(132-174)         | 154 | 3.21(3.16,3.25)    | 3.32(3.27,3.36)    | 3.82(3.78,3.85)    | 3.44(3.41,3.46)    | 60  |
| Niger                    | 170(147-197)       | 125 | 547(474-636)         | 112 | 3.87(3.82,3.91)    | 4.35(4.31,4.40)    | 4.10(4.02,4.17)    | 4.11(4.08,4.14)    | 22  |
| Nigeria                  | 2,151(1,927-2,399) | 38  | 5,884(5,262-6,601)   | 31  | 3.23(3.21,3.26)    | 3.16(3.14,3.19)    | 4.43(4.11,4.75)    | 3.56(3.46,3.66)    | 46  |
| Sao Tome and Principe    | 3(3-4)             | 191 | 7(6-9)               | 189 | 1.82(1.78,1.86)    | 2.90(2.87,2.94)    | 4.18(4.12,4.24)    | 2.96(2.93,2.99)    | 84  |
| Senegal                  | 189(163-219)       | 120 | 492(429-573)         | 116 | 3.62(3.60,3.64)    | 3.19(3.14,3.24)    | 3.36(3.24,3.49)    | 3.38(3.33,3.42)    | 65  |
| Sierra Leone             | 97(85-112)         | 142 | 242(209-284)         | 143 | 1.61(1.47,1.75)    | 3.73(3.51,3.94)    | 4.34(4.18,4.50)    | 3.26(3.14,3.37)    | 72  |
| Togo                     | 82(70-96)          | 143 | 250(213-293)         | 142 | 3.70(3.64,3.76)    | 3.89(3.81,3.96)    | 4.27(4.19,4.34)    | 3.94(3.90,3.99)    | 30  |
| American Samoa           | 2(2-2)             | 197 | 3(2-3)               | 196 | 2.82(2.69,2.95)    | -0.18(-0.33,-0.02) | 0.22(0.12,0.33)    | 0.89(0.80,0.98)    | 178 |
| Bermuda                  | 6(5-7)             | 183 | 10(9-11)             | 183 | 2.24(2.14,2.35)    | 1.76(1.70,1.83)    | 0.66(0.60,0.72)    | 1.59(1.55,1.64)    | 143 |
| Cook Islands             | 1(1-1)             | 199 | 1(1-1)               | 200 | 0.88(0.79,0.96)    | 0.65(0.37,0.93)    | 0.31(0.16,0.46)    | 0.57(0.46,0.68)    | 187 |
| Greenland                | 5(5-6)             | 185 | 11(9-12)             | 181 | 2.80(2.77,2.83)    | 2.25(2.23,2.28)    | 1.89(1.72,2.05)    | 2.32(2.26,2.37)    | 117 |
| Guam                     | 6(5-8)             | 181 | 8(7-10)              | 188 | 1.91(1.79,2.02)    | 0.18(0.15,0.21)    | 0.63(0.55,0.71)    | 0.93(0.88,0.97)    | 174 |
| Monaco                   | 3(3-3)             | 192 | 4(4-5)               | 194 | 0.73(0.54,0.92)    | 1.32(1.24,1.41)    | 1.47(1.22,1.71)    | 1.17(1.05,1.29)    | 162 |
| Nauru                    | 0(0-0)             | 201 | 0(0-1)               | 202 | 0.85(0.78,0.93)    | -0.33(-0.39,-0.26) | 1.94(1.66,2.21)    | 0.74(0.65,0.83)    | 180 |
| Niue                     | 0(0-0)             | 203 | 0(0-0)               | 203 | -0.32(-0.42,-0.21) | -1.29(-1.37,-1.21) | 1.30(1.17,1.43)    | -0.15(-0.22,-0.09) | 199 |
| Northern Mariana Islands | 2(2-3)             | 195 | 2(2-3)               | 198 | 5.99(4.52,7.49)    | -4.19(-4.63,-3.75) | -2.44(-3.14,-1.74) | -0.05(-0.63,0.53)  | 198 |
| Palau                    | 1(1-1)             | 200 | 1(1-1)               | 199 | 3.77(3.59,3.95)    | -0.10(-0.24,0.05)  | 0.00(-0.18,0.17)   | 1.13(1.02,1.24)    | 167 |
| Puerto Rico              | 391(344-459)       | 94  | 560(490-635)         | 111 | 2.21(2.17,2.25)    | 1.46(1.35,1.56)    | 0.09(-0.02,0.20)   | 1.26(1.20,1.31)    | 159 |
| Saint Kitts and Nevis    | 4(3-4)             | 188 | 8(7-10)              | 187 | 3.42(3.23,3.61)    | 3.27(3.20,3.34)    | 1.77(1.65,1.89)    | 2.84(2.76,2.93)    | 89  |
| San Marino               | 3(2-3)             | 193 | 5(4-6)               | 192 | 1.61(1.32,1.90)    | 2.12(2.01,2.23)    | 2.16(1.83,2.50)    | 1.95(1.79,2.12)    | 131 |
| Tokelau                  | 0(0-0)             | 204 | 0(0-0)               | 204 | 0.36(-0.03,0.74)   | -1.90(-2.33,-1.46) | 2.21(2.07,2.34)    | 0.34(0.13,0.56)    | 193 |

|                                       |                          |     |                          |     |                    |                    |                    |                    |     |
|---------------------------------------|--------------------------|-----|--------------------------|-----|--------------------|--------------------|--------------------|--------------------|-----|
| Tuvalu                                | 0(0-0)                   | 202 | 0(0-1)                   | 201 | 0.90(0.86,0.95)    | 1.29(1.27,1.32)    | 2.00(1.95,2.06)    | 1.39(1.37,1.42)    | 156 |
| United States Virgin Islands          | 9(7-10)                  | 176 | 12(10-14)                | 179 | 1.92(1.88,1.96)    | 1.17(1.05,1.29)    | 0.41(0.31,0.51)    | 1.16(1.10,1.21)    | 165 |
| South Sudan                           | 484(432-550)             | 87  | 933(827-1,062)           | 91  | 1.67(1.55,1.79)    | 3.08(3.03,3.12)    | 2.02(1.68,2.36)    | 2.31(2.20,2.43)    | 119 |
| Sudan                                 | 523(443-621)             | 81  | 1,542(1,317-1,829)       | 72  | 3.29(3.25,3.34)    | 3.46(3.38,3.54)    | 4.63(4.36,4.91)    | 3.77(3.68,3.87)    | 34  |
| <b>Psoriasis</b>                      |                          |     |                          |     |                    |                    |                    |                    |     |
| China                                 | 784,605(756,135-813,047) | 1   | 892,906(859,645-924,276) | 1   | 0.88(0.80,0.95)    | 0.47(0.46,0.48)    | 0.04(0.02,0.05)    | 0.46(0.43,0.48)    | 148 |
| Democratic People's Republic of Korea | 16,106(15,424-16,801)    | 37  | 18,993(18,187-19,767)    | 45  | 1.24(1.18,1.29)    | 0.52(0.49,0.54)    | 0.02(0.01,0.04)    | 0.57(0.55,0.59)    | 140 |
| Taiwan (Province of China)            | 12,906(12,374-13,462)    | 46  | 14,068(13,426-14,653)    | 52  | 0.64(0.62,0.66)    | 0.30(0.27,0.34)    | -0.11(-0.15,-0.07) | 0.29(0.27,0.31)    | 155 |
| Cambodia                              | 2,655(2,546-2,768)       | 100 | 4,215(4,048-4,395)       | 98  | 1.87(1.84,1.89)    | 1.37(1.34,1.40)    | 1.56(1.49,1.62)    | 1.60(1.58,1.62)    | 72  |
| Indonesia                             | 23,160(22,248-24,050)    | 26  | 34,475(33,118-35,772)    | 22  | 1.59(1.54,1.64)    | 1.29(1.12,1.46)    | 1.32(1.02,1.62)    | 1.39(1.27,1.50)    | 86  |
| Lao People's Democratic Republic      | 1,127(1,082-1,173)       | 134 | 1,812(1,740-1,885)       | 132 | 2.12(2.11,2.14)    | 1.54(1.50,1.57)    | 1.29(1.24,1.35)    | 1.65(1.63,1.67)    | 69  |
| Malaysia                              | 3,625(3,477-3,769)       | 87  | 6,234(5,979-6,493)       | 83  | 2.69(2.64,2.75)    | 1.70(1.55,1.85)    | 1.30(1.28,1.32)    | 1.89(1.84,1.95)    | 57  |
| Maldives                              | 51(49-53)                | 184 | 115(110-121)             | 176 | 1.90(1.86,1.95)    | 2.36(2.31,2.41)    | 4.49(4.45,4.52)    | 2.88(2.85,2.90)    | 11  |
| Myanmar                               | 11,465(11,016-11,948)    | 52  | 14,468(13,896-15,026)    | 51  | 1.18(1.12,1.24)    | 0.46(0.41,0.51)    | 0.72(0.69,0.75)    | 0.79(0.76,0.82)    | 126 |
| Philippines                           | 14,330(13,826-14,865)    | 42  | 25,748(24,810-26,703)    | 29  | 2.28(2.24,2.31)    | 2.52(2.50,2.54)    | 1.25(1.17,1.34)    | 2.05(2.02,2.08)    | 47  |
| Sri Lanka                             | 6,841(6,555-7,153)       | 66  | 8,196(7,838-8,565)       | 69  | 0.72(0.69,0.76)    | 0.82(0.81,0.84)    | 0.35(0.29,0.41)    | 0.63(0.60,0.65)    | 135 |
| Thailand                              | 13,679(13,113-14,293)    | 43  | 18,373(17,574-19,165)    | 47  | 1.08(1.04,1.13)    | 1.33(1.01,1.65)    | 0.63(0.57,0.69)    | 1.00(0.90,1.11)    | 110 |
| Timor-Leste                           | 199(191-207)             | 166 | 297(285-309)             | 166 | 1.65(1.59,1.71)    | 0.49(0.29,0.68)    | 1.85(1.79,1.91)    | 1.36(1.29,1.42)    | 88  |
| Viet Nam                              | 17,077(16,389-17,824)    | 34  | 24,566(23,509-25,523)    | 32  | 1.53(1.52,1.55)    | 1.18(1.17,1.20)    | 1.07(0.98,1.15)    | 1.27(1.24,1.29)    | 99  |
| Fiji                                  | 263(252-276)             | 162 | 312(299-325)             | 163 | 0.60(0.57,0.64)    | 0.87(0.84,0.89)    | 0.20(0.17,0.23)    | 0.58(0.56,0.60)    | 138 |
| Kiribati                              | 25(24-26)                | 193 | 40(38-42)                | 189 | 1.39(1.32,1.46)    | 2.22(2.17,2.28)    | 1.22(1.17,1.28)    | 1.65(1.61,1.69)    | 68  |
| Marshall Islands                      | 15(14-16)                | 196 | 19(18-20)                | 196 | 1.30(1.28,1.32)    | 0.67(0.63,0.70)    | 0.57(0.53,0.62)    | 0.85(0.83,0.87)    | 121 |
| Micronesia (Federated States of)      | 34(32-35)                | 190 | 34(32-35)                | 193 | 0.37(0.32,0.42)    | -0.24(-0.25,-0.23) | -0.15(-0.21,-0.10) | -0.01(-0.03,0.02)  | 170 |
| Papua New Guinea                      | 1,555(1,490-1,622)       | 119 | 3,524(3,382-3,678)       | 107 | 2.67(2.60,2.74)    | 3.14(3.13,3.16)    | 2.70(2.68,2.73)    | 2.86(2.83,2.88)    | 12  |
| Samoa                                 | 53(51-55)                | 183 | 70(68-73)                | 181 | 0.94(0.89,0.99)    | 0.92(0.89,0.95)    | 1.10(1.07,1.13)    | 0.99(0.97,1.01)    | 112 |
| Solomon Islands                       | 126(121-132)             | 169 | 231(222-241)             | 168 | 2.46(2.45,2.46)    | 2.24(2.22,2.26)    | 1.64(1.61,1.67)    | 2.12(2.11,2.13)    | 44  |
| Tonga                                 | 33(32-35)                | 191 | 34(32-35)                | 192 | 0.14(0.08,0.20)    | 0.53(0.47,0.60)    | -0.62(-0.70,-0.55) | 0.03(-0.03,0.09)   | 168 |
| Vanuatu                               | 55(53-58)                | 181 | 103(98-108)              | 177 | 2.16(2.13,2.19)    | 2.48(2.44,2.51)    | 1.82(1.78,1.85)    | 2.16(2.14,2.19)    | 42  |
| Armenia                               | 2,462(2,351-2,567)       | 102 | 1,941(1,851-2,031)       | 129 | -0.43(-0.49,-0.37) | -1.55(-1.62,-1.48) | -0.31(-0.36,-0.26) | -0.82(-0.85,-0.78) | 191 |
| Azerbaijan                            | 4,896(4,675-5,113)       | 76  | 6,606(6,297-6,907)       | 80  | 1.39(1.36,1.43)    | 0.41(0.13,0.70)    | 1.31(1.26,1.36)    | 1.06(0.97,1.15)    | 107 |
| Georgia                               | 3,886(3,712-4,056)       | 82  | 2,377(2,268-2,484)       | 118 | -1.42(-1.49,-1.34) | -2.36(-2.39,-2.33) | -1.19(-1.22,-1.16) | -1.68(-1.71,-1.65) | 204 |
| Kazakhstan                            | 11,705(11,192-12,199)    | 51  | 11,534(11,012-12,029)    | 59  | -1.23(-1.41,-1.05) | -0.08(-0.12,-0.03) | 1.16(1.11,1.22)    | -0.05(-0.11,0.01)  | 173 |
| Kyrgyzstan                            | 3,103(2,965-3,243)       | 95  | 4,183(3,997-4,370)       | 100 | 0.95(0.88,1.01)    | 0.73(0.68,0.78)    | 1.50(1.46,1.54)    | 1.04(1.01,1.08)    | 108 |
| Mongolia                              | 1,514(1,449-1,581)       | 121 | 2,210(2,113-2,302)       | 123 | 1.11(1.07,1.16)    | 1.00(0.95,1.05)    | 1.92(1.89,1.96)    | 1.32(1.30,1.35)    | 93  |
| Tajikistan                            | 3,674(3,515-3,838)       | 86  | 6,039(5,788-6,298)       | 87  | 1.62(1.53,1.70)    | 1.49(1.43,1.54)    | 2.00(1.97,2.03)    | 1.73(1.69,1.76)    | 63  |
| Turkmenistan                          | 2,412(2,309-2,517)       | 104 | 2,979(2,851-3,115)       | 109 | 1.11(1.03,1.20)    | 0.40(0.34,0.47)    | 0.74(0.68,0.80)    | 0.72(0.68,0.77)    | 130 |
| Uzbekistan                            | 14,527(13,902-15,160)    | 40  | 21,107(20,180-22,041)    | 39  | 1.60(1.57,1.64)    | 0.98(0.94,1.01)    | 1.38(1.35,1.40)    | 1.30(1.28,1.32)    | 96  |
| Albania                               | 2,358(2,265-2,450)       | 107 | 1,814(1,743-1,884)       | 131 | 0.05(-0.11,0.21)   | -1.68(-1.84,-1.52) | -0.78(-0.89,-0.67) | -0.90(-1.03,-0.77) | 195 |

|                        |                          |     |                          |     |                    |                    |                    |                    |     |
|------------------------|--------------------------|-----|--------------------------|-----|--------------------|--------------------|--------------------|--------------------|-----|
| Bosnia and Herzegovina | 3,610(3,473-3,749)       | 88  | 2,269(2,174-2,358)       | 120 | -1.72(-2.00,-1.43) | -1.63(-1.93,-1.34) | -1.55(-1.77,-1.32) | -1.62(-1.79,-1.46) | 203 |
| Bulgaria               | 6,684(6,419-6,938)       | 67  | 4,552(4,366-4,734)       | 96  | -1.39(-1.47,-1.32) | -1.46(-1.55,-1.38) | -0.97(-1.02,-0.91) | -1.29(-1.34,-1.25) | 200 |
| Croatia                | 3,674(3,527-3,824)       | 85  | 2,744(2,635-2,853)       | 113 | -1.09(-1.28,-0.90) | -1.38(-1.64,-1.12) | -0.50(-0.57,-0.43) | -0.98(-1.08,-0.88) | 196 |
| Czechia                | 7,673(7,378-7,957)       | 63  | 6,795(6,517-7,069)       | 77  | -0.65(-0.73,-0.56) | -0.48(-0.73,-0.23) | -0.08(-0.14,-0.02) | -0.38(-0.47,-0.30) | 187 |
| Hungary                | 7,939(7,616-8,224)       | 62  | 6,317(6,055-6,548)       | 82  | -0.87(-0.94,-0.79) | -0.95(-1.14,-0.76) | -0.48(-0.54,-0.41) | -0.75(-0.82,-0.68) | 189 |
| North Macedonia        | 1,468(1,413-1,519)       | 123 | 1,422(1,363-1,476)       | 138 | 0.18(-0.60,0.95)   | -0.47(-0.63,-0.31) | 0.09(-0.14,0.31)   | -0.10(-0.35,0.16)  | 176 |
| Montenegro             | 433(416-448)             | 154 | 392(377-408)             | 160 | 0.22(0.14,0.29)    | -0.81(-0.90,-0.73) | -0.26(-0.32,-0.20) | -0.32(-0.37,-0.27) | 185 |
| Poland                 | 29,206(28,137-30,311)    | 20  | 28,151(27,328-28,936)    | 25  | -0.15(-0.19,-0.11) | -0.03(-0.16,0.10)  | -0.18(-0.21,-0.14) | -0.12(-0.16,-0.08) | 177 |
| Romania                | 16,954(16,323-17,555)    | 35  | 12,055(11,615-12,533)    | 57  | -0.79(-0.84,-0.75) | -1.65(-1.82,-1.48) | -0.91(-0.97,-0.84) | -1.14(-1.21,-1.08) | 199 |
| Serbia                 | 7,233(6,955-7,503)       | 65  | 5,654(5,437-5,877)       | 90  | -0.38(-0.77,0.01)  | -1.37(-1.67,-1.08) | -0.65(-0.87,-0.43) | -0.84(-1.02,-0.66) | 192 |
| Slovakia               | 3,900(3,761-4,042)       | 81  | 3,526(3,388-3,661)       | 106 | -0.35(-0.41,-0.29) | -0.61(-0.75,-0.46) | -0.05(-0.10,0.01)  | -0.32(-0.37,-0.27) | 186 |
| Slovenia               | 1,412(1,358-1,466)       | 124 | 1,305(1,252-1,356)       | 142 | -0.28(-0.29,-0.27) | -0.51(-0.55,-0.47) | 0.03(-0.04,0.10)   | -0.27(-0.30,-0.25) | 183 |
| Belarus                | 8,076(7,754-8,369)       | 60  | 6,510(6,251-6,781)       | 81  | -0.48(-0.51,-0.45) | -1.36(-1.45,-1.28) | -0.29(-0.32,-0.25) | -0.74(-0.77,-0.71) | 188 |
| Estonia                | 1,175(1,129-1,220)       | 132 | 848(814-879)             | 147 | -1.74(-1.82,-1.65) | -1.27(-1.39,-1.16) | -0.38(-0.46,-0.30) | -1.14(-1.20,-1.08) | 198 |
| Latvia                 | 1,975(1,900-2,052)       | 112 | 1,246(1,195-1,297)       | 143 | -1.43(-1.48,-1.38) | -1.97(-2.04,-1.91) | -1.22(-1.26,-1.18) | -1.58(-1.61,-1.54) | 202 |
| Lithuania              | 2,680(2,574-2,778)       | 99  | 1,791(1,717-1,863)       | 133 | -0.79(-0.84,-0.74) | -1.96(-2.03,-1.88) | -1.31(-1.36,-1.26) | -1.39(-1.43,-1.35) | 201 |
| Republic of Moldova    | 3,244(3,125-3,362)       | 94  | 2,553(2,448-2,653)       | 116 | -0.46(-0.48,-0.45) | -1.33(-1.39,-1.26) | -0.58(-0.61,-0.56) | -0.81(-0.84,-0.79) | 190 |
| Russian Federation     | 105,532(101,563-109,520) | 9   | 96,948(93,468-100,400)   | 10  | -0.40(-0.44,-0.35) | -0.68(-1.04,-0.32) | 0.11(0.02,0.20)    | -0.31(-0.43,-0.19) | 184 |
| Ukraine                | 38,843(37,424-40,324)    | 15  | 30,080(28,899-31,319)    | 24  | -0.72(-0.75,-0.69) | -1.40(-1.65,-1.15) | -0.51(-0.56,-0.46) | -0.86(-0.94,-0.78) | 194 |
| Brunei Darussalam      | 89(86-93)                | 175 | 161(154-168)             | 174 | 2.68(2.65,2.71)    | 1.92(1.90,1.93)    | 1.53(1.50,1.56)    | 2.04(2.03,2.06)    | 49  |
| Japan                  | 55,544(53,578-57,514)    | 11  | 57,045(54,998-58,992)    | 15  | 0.48(0.46,0.50)    | 0.12(0.07,0.17)    | -0.32(-0.36,-0.27) | 0.10(0.08,0.12)    | 164 |
| Republic of Korea      | 19,576(18,790-20,437)    | 29  | 24,621(23,555-25,646)    | 31  | 0.50(0.48,0.52)    | 0.71(0.66,0.75)    | 1.15(1.09,1.22)    | 0.80(0.77,0.83)    | 124 |
| Singapore              | 1,126(1,080-1,174)       | 135 | 2,164(2,074-2,250)       | 125 | 2.98(2.76,3.21)    | 2.10(1.49,2.71)    | 1.69(1.39,2.00)    | 2.32(2.08,2.55)    | 34  |
| Australia              | 26,593(25,522-27,670)    | 22  | 36,165(34,649-37,716)    | 20  | 1.26(1.22,1.30)    | 1.16(1.12,1.20)    | 0.74(0.68,0.79)    | 1.06(1.03,1.09)    | 106 |
| New Zealand            | 5,904(5,695-6,104)       | 73  | 7,387(7,116-7,647)       | 71  | 0.97(0.92,1.03)    | 1.22(1.17,1.26)    | 0.24(0.21,0.27)    | 0.79(0.76,0.81)    | 125 |
| Andorra                | 124(119-128)             | 170 | 193(186-201)             | 171 | 1.42(0.92,1.93)    | 2.52(1.27,3.79)    | 0.24(-1.00,1.50)   | 1.25(0.57,1.92)    | 100 |
| Austria                | 18,745(18,076-19,420)    | 31  | 20,770(19,961-21,523)    | 41  | 0.20(0.17,0.23)    | 0.34(0.22,0.45)    | 0.55(0.50,0.60)    | 0.35(0.31,0.40)    | 152 |
| Belgium                | 24,611(23,699-25,517)    | 25  | 26,452(25,453-27,481)    | 28  | 0.06(0.06,0.07)    | 0.38(0.36,0.39)    | 0.31(0.30,0.32)    | 0.25(0.25,0.26)    | 157 |
| Cyprus                 | 1,815(1,749-1,877)       | 116 | 2,924(2,811-3,032)       | 110 | 1.33(1.31,1.34)    | 1.85(1.80,1.89)    | 1.79(1.76,1.81)    | 1.66(1.64,1.67)    | 67  |
| Denmark                | 12,448(11,992-12,905)    | 48  | 13,386(12,870-13,875)    | 55  | 0.27(0.25,0.29)    | 0.21(0.20,0.21)    | 0.29(0.29,0.29)    | 0.25(0.25,0.26)    | 156 |
| Finland                | 13,102(12,649-13,559)    | 45  | 13,501(13,010-13,980)    | 54  | 0.26(0.25,0.26)    | 0.09(0.09,0.10)    | -0.04(-0.05,-0.03) | 0.10(0.10,0.11)    | 165 |
| France                 | 160,279(154,148-166,526) | 5   | 172,843(166,210-179,240) | 5   | 0.36(0.33,0.38)    | 0.43(0.38,0.47)    | -0.04(-0.11,0.03)  | 0.25(0.22,0.28)    | 158 |
| Germany                | 162,807(156,861-168,814) | 4   | 167,515(161,352-173,618) | 6   | 0.29(0.08,0.51)    | -0.20(-0.29,-0.11) | 0.09(-0.54,0.72)   | 0.04(-0.17,0.25)   | 167 |
| Greece                 | 25,418(24,479-26,360)    | 24  | 23,753(22,836-24,627)    | 34  | 0.43(0.37,0.49)    | -0.22(-0.29,-0.16) | -0.91(-0.95,-0.87) | -0.24(-0.28,-0.21) | 181 |
| Iceland                | 630(607-652)             | 146 | 833(802-862)             | 148 | 0.91(0.88,0.94)    | 1.29(1.15,1.43)    | 0.78(0.68,0.88)    | 0.97(0.91,1.03)    | 114 |
| Ireland                | 8,591(8,295-8,880)       | 57  | 11,346(10,944-11,771)    | 60  | 0.60(0.47,0.74)    | 1.66(1.62,1.70)    | 0.53(0.47,0.59)    | 0.98(0.93,1.03)    | 113 |
| Israel                 | 10,556(10,194-10,927)    | 53  | 19,158(18,527-19,854)    | 44  | 2.48(2.45,2.50)    | 2.04(2.02,2.05)    | 1.70(1.69,1.72)    | 2.07(2.06,2.09)    | 46  |
| Italy                  | 110,243(106,453-113,988) | 8   | 109,807(105,647-114,073) | 8   | 0.01(-0.06,0.08)   | 0.48(0.45,0.51)    | -0.64(-0.80,-0.49) | -0.01(-0.07,0.04)  | 169 |

|                                  |                          |     |                          |     |                    |                    |                    |                    |     |
|----------------------------------|--------------------------|-----|--------------------------|-----|--------------------|--------------------|--------------------|--------------------|-----|
| Luxembourg                       | 902(870-934)             | 140 | 1,427(1,374-1,476)       | 137 | 1.10(1.06,1.14)    | 1.37(1.35,1.40)    | 2.36(2.34,2.38)    | 1.59(1.58,1.61)    | 73  |
| Malta                            | 891(860-924)             | 141 | 996(958-1,032)           | 145 | 0.68(0.66,0.70)    | 0.46(0.45,0.48)    | 0.01(-0.01,0.03)   | 0.39(0.38,0.40)    | 149 |
| Netherlands                      | 35,699(34,429-36,965)    | 19  | 39,506(37,991-41,047)    | 19  | 0.58(0.57,0.59)    | 0.33(0.32,0.33)    | 0.14(0.13,0.16)    | 0.35(0.34,0.36)    | 151 |
| Norway                           | 7,564(7,318-7,813)       | 64  | 9,355(9,038-9,670)       | 66  | 0.46(0.45,0.47)    | 0.74(0.72,0.77)    | 0.99(0.97,1.02)    | 0.74(0.72,0.75)    | 129 |
| Portugal                         | 25,800(24,865-26,716)    | 23  | 25,564(24,604-26,526)    | 30  | 0.17(0.14,0.21)    | 0.10(0.08,0.12)    | -0.37(-0.39,-0.35) | -0.02(-0.04,-0.01) | 171 |
| Spain                            | 90,544(86,844-94,095)    | 10  | 104,133(99,854-108,476)  | 9   | 0.33(0.29,0.38)    | 1.42(1.38,1.47)    | -0.34(-0.45,-0.22) | 0.50(0.44,0.55)    | 145 |
| Sweden                           | 16,171(15,582-16,725)    | 36  | 18,918(18,240-19,571)    | 46  | 0.33(0.29,0.36)    | 0.51(0.48,0.55)    | 0.78(0.76,0.79)    | 0.53(0.52,0.55)    | 142 |
| Switzerland                      | 15,449(14,891-15,997)    | 38  | 19,321(18,587-20,062)    | 42  | 0.56(0.54,0.58)    | 0.78(0.72,0.85)    | 0.94(0.88,1.00)    | 0.76(0.73,0.79)    | 128 |
| United Kingdom                   | 130,679(126,486-134,745) | 7   | 144,237(139,636-148,769) | 7   | 0.16(0.14,0.17)    | 0.45(0.43,0.47)    | 0.42(0.40,0.44)    | 0.35(0.34,0.36)    | 153 |
| Argentina                        | 36,166(34,666-37,684)    | 17  | 47,387(45,347-49,524)    | 17  | 0.72(0.69,0.74)    | 1.12(1.11,1.13)    | 0.98(0.96,1.00)    | 0.93(0.92,0.95)    | 117 |
| Chile                            | 14,419(13,782-15,057)    | 41  | 19,225(18,381-20,058)    | 43  | 1.19(1.16,1.22)    | 0.94(0.93,0.95)    | 0.87(0.78,0.96)    | 1.00(0.97,1.03)    | 109 |
| Uruguay                          | 3,432(3,291-3,578)       | 91  | 3,596(3,445-3,758)       | 104 | 0.26(0.23,0.29)    | 0.16(0.15,0.17)    | 0.06(0.05,0.08)    | 0.16(0.14,0.17)    | 160 |
| Canada                           | 27,254(26,311-28,143)    | 21  | 34,709(33,461-35,993)    | 21  | 0.82(0.78,0.86)    | 0.88(0.86,0.90)    | 0.82(0.78,0.85)    | 0.84(0.82,0.86)    | 122 |
| United States of America         | 274,815(266,032-283,181) | 3   | 324,492(313,901-334,530) | 3   | 0.83(0.73,0.92)    | 0.25(0.14,0.36)    | 0.67(0.65,0.69)    | 0.58(0.53,0.63)    | 139 |
| Antigua and Barbuda              | 32(31-34)                | 192 | 48(46-50)                | 188 | 2.30(2.19,2.41)    | 1.32(1.21,1.42)    | 0.57(0.53,0.60)    | 1.41(1.36,1.46)    | 84  |
| Bahamas                          | 131(126-137)             | 168 | 200(191-208)             | 170 | 2.07(2.03,2.12)    | 1.39(1.37,1.41)    | 0.99(0.94,1.05)    | 1.47(1.45,1.50)    | 79  |
| Barbados                         | 132(127-137)             | 167 | 161(154-168)             | 173 | 0.29(0.22,0.35)    | 1.03(1.00,1.05)    | 0.79(0.74,0.84)    | 0.71(0.68,0.74)    | 131 |
| Belize                           | 109(104-113)             | 173 | 225(216-235)             | 169 | 1.99(1.90,2.07)    | 2.95(2.93,2.97)    | 2.62(2.58,2.67)    | 2.55(2.52,2.58)    | 22  |
| Cuba                             | 6,293(6,037-6,577)       | 70  | 6,896(6,572-7,209)       | 76  | 0.96(0.92,0.99)    | 0.17(0.15,0.19)    | -0.19(-0.22,-0.17) | 0.32(0.30,0.33)    | 154 |
| Dominica                         | 40(38-41)                | 187 | 37(35-38)                | 191 | -0.59(-0.60,-0.58) | -0.26(-0.27,-0.25) | 0.03(0.01,0.04)    | -0.27(-0.28,-0.27) | 182 |
| Dominican Republic               | 4,275(4,088-4,467)       | 78  | 6,164(5,902-6,431)       | 86  | 2.09(2.00,2.18)    | 0.67(0.60,0.75)    | 1.06(1.01,1.11)    | 1.28(1.23,1.33)    | 97  |
| Grenada                          | 48(46-50)                | 185 | 57(54-59)                | 184 | 1.30(1.21,1.39)    | 0.69(0.56,0.81)    | -0.28(-0.31,-0.25) | 0.59(0.54,0.64)    | 136 |
| Guyana                           | 410(392-429)             | 155 | 401(383-418)             | 159 | -0.14(-0.17,-0.11) | -0.23(-0.26,-0.19) | 0.24(0.14,0.34)    | -0.05(-0.09,-0.01) | 172 |
| Haiti                            | 4,175(4,005-4,349)       | 79  | 7,689(7,367-8,012)       | 70  | 2.19(2.18,2.21)    | 2.19(2.18,2.21)    | 2.06(1.94,2.18)    | 2.13(2.08,2.19)    | 43  |
| Jamaica                          | 1,307(1,253-1,362)       | 127 | 1,523(1,457-1,592)       | 135 | 0.88(0.79,0.98)    | 0.37(0.36,0.39)    | 0.30(0.28,0.31)    | 0.53(0.50,0.56)    | 143 |
| Saint Lucia                      | 75(72-78)                | 176 | 99(94-103)               | 178 | 1.02(1.01,1.04)    | 1.10(1.08,1.12)    | 0.78(0.76,0.81)    | 0.97(0.96,0.99)    | 115 |
| Saint Vincent and the Grenadines | 61(59-64)                | 179 | 64(61-67)                | 182 | -0.15(-0.16,-0.13) | 0.30(0.27,0.34)    | 0.34(0.31,0.36)    | 0.16(0.15,0.18)    | 161 |
| Suriname                         | 206(198-216)             | 165 | 303(291-316)             | 165 | 1.42(1.36,1.48)    | 1.77(1.73,1.80)    | 0.76(0.72,0.81)    | 1.34(1.31,1.37)    | 90  |
| Trinidad and Tobago              | 609(584-636)             | 148 | 718(687-749)             | 154 | 0.78(0.75,0.80)    | 0.43(0.42,0.45)    | 0.49(0.45,0.53)    | 0.56(0.55,0.58)    | 141 |
| Bolivia (Plurinational State of) | 6,392(6,131-6,672)       | 69  | 10,806(10,336-11,272)    | 61  | 2.04(2.02,2.07)    | 1.75(1.70,1.79)    | 1.65(1.58,1.71)    | 1.83(1.80,1.86)    | 59  |
| Ecuador                          | 8,308(7,944-8,692)       | 58  | 13,354(12,779-13,967)    | 56  | 1.88(1.76,1.99)    | 1.59(1.52,1.66)    | 1.45(1.40,1.49)    | 1.64(1.60,1.69)    | 70  |
| Peru                             | 19,050(18,164-19,900)    | 30  | 27,942(26,655-29,131)    | 26  | 1.50(1.43,1.57)    | 1.13(1.11,1.16)    | 1.39(1.20,1.58)    | 1.33(1.26,1.39)    | 92  |
| Colombia                         | 6,574(6,312-6,837)       | 68  | 9,471(9,106-9,861)       | 65  | 2.00(1.92,2.07)    | 1.20(1.16,1.24)    | 0.70(0.62,0.78)    | 1.28(1.24,1.32)    | 98  |
| Costa Rica                       | 602(578-626)             | 149 | 938(899-974)             | 146 | 2.38(2.34,2.42)    | 1.36(1.33,1.38)    | 0.90(0.85,0.96)    | 1.53(1.51,1.56)    | 76  |
| El Salvador                      | 1,174(1,130-1,222)       | 133 | 1,313(1,260-1,369)       | 141 | 0.70(0.63,0.77)    | 0.08(0.07,0.10)    | 0.42(0.40,0.43)    | 0.39(0.37,0.41)    | 150 |
| Guatemala                        | 1,897(1,821-1,978)       | 115 | 3,742(3,588-3,906)       | 101 | 2.40(2.36,2.44)    | 2.50(2.49,2.52)    | 2.19(2.13,2.26)    | 2.37(2.35,2.40)    | 31  |
| Honduras                         | 1,088(1,042-1,136)       | 136 | 2,128(2,050-2,223)       | 127 | 2.27(2.22,2.32)    | 2.44(2.43,2.46)    | 2.33(2.29,2.38)    | 2.34(2.32,2.36)    | 33  |
| Mexico                           | 18,444(17,794-19,178)    | 32  | 26,783(25,781-27,818)    | 27  | 1.52(1.41,1.63)    | 1.34(1.31,1.36)    | 1.05(1.01,1.10)    | 1.31(1.27,1.35)    | 94  |

|                                    |                          |     |                          |     |                   |                    |                    |                  |     |
|------------------------------------|--------------------------|-----|--------------------------|-----|-------------------|--------------------|--------------------|------------------|-----|
| Nicaragua                          | 864(831-902)             | 142 | 1,397(1,341-1,454)       | 139 | 2.06(2.02,2.10)   | 1.56(1.54,1.57)    | 1.42(1.36,1.48)    | 1.67(1.64,1.70)  | 66  |
| Panama                             | 469(451-488)             | 152 | 786(755-815)             | 150 | 1.89(1.75,2.04)   | 1.84(1.67,2.00)    | 1.72(1.69,1.76)    | 1.81(1.73,1.88)  | 60  |
| Venezuela (Bolivarian Republic of) | 3,731(3,581-3,878)       | 83  | 5,812(5,578-6,044)       | 88  | 2.00(1.84,2.15)   | 2.10(1.89,2.31)    | 0.33(0.10,0.57)    | 1.51(1.39,1.63)  | 77  |
| Brazil                             | 130,999(126,494-135,573) | 6   | 196,399(189,359-202,875) | 4   | 1.61(1.60,1.62)   | 1.50(1.48,1.52)    | 1.12(1.06,1.17)    | 1.41(1.39,1.43)  | 83  |
| Paraguay                           | 3,554(3,397-3,711)       | 90  | 6,172(5,902-6,455)       | 85  | 2.37(2.32,2.42)   | 1.92(1.91,1.94)    | 1.48(1.38,1.58)    | 1.92(1.89,1.96)  | 55  |
| Algeria                            | 15,261(14,634-15,902)    | 39  | 23,015(22,050-23,987)    | 37  | 1.58(1.55,1.61)   | 1.35(1.33,1.36)    | 1.36(1.31,1.40)    | 1.42(1.40,1.44)  | 81  |
| Bahrain                            | 298(284-312)             | 158 | 827(788-865)             | 149 | 1.95(1.88,2.03)   | 6.78(6.68,6.88)    | 1.85(1.59,2.11)    | 3.58(3.49,3.67)  | 4   |
| Egypt                              | 21,844(20,908-22,743)    | 27  | 32,864(31,645-34,097)    | 23  | 1.12(1.07,1.16)   | 1.77(1.75,1.80)    | 1.30(1.26,1.34)    | 1.42(1.40,1.45)  | 82  |
| Iran (Islamic Republic of)         | 37,217(35,895-38,552)    | 16  | 48,309(46,547-50,098)    | 16  | 0.87(0.60,1.15)   | 0.85(0.39,1.31)    | 1.05(0.99,1.10)    | 0.94(0.77,1.11)  | 116 |
| Iraq                               | 12,168(11,639-12,696)    | 50  | 24,332(23,393-25,350)    | 33  | 3.94(3.06,4.82)   | 1.75(1.62,1.88)    | 1.75(1.62,1.88)    | 2.46(2.17,2.76)  | 27  |
| Jordan                             | 2,118(2,023-2,212)       | 108 | 5,801(5,570-6,036)       | 89  | 1.99(1.48,2.49)   | 3.78(3.67,3.89)    | 5.01(4.90,5.12)    | 3.56(3.37,3.74)  | 5   |
| Kuwait                             | 952(909-999)             | 139 | 2,264(2,169-2,365)       | 121 | 0.60(0.34,0.86)   | 3.95(3.85,4.05)    | 4.49(4.25,4.74)    | 3.03(2.90,3.16)  | 10  |
| Lebanon                            | 2,082(1,998-2,168)       | 110 | 2,785(2,678-2,900)       | 112 | 0.83(0.79,0.88)   | 0.44(0.40,0.47)    | 1.86(1.71,2.02)    | 1.00(0.95,1.05)  | 111 |
| Libya                              | 2,400(2,303-2,500)       | 105 | 3,566(3,415-3,723)       | 105 | 0.79(0.66,0.91)   | 1.74(1.68,1.79)    | 1.60(1.55,1.65)    | 1.40(1.34,1.45)  | 85  |
| Morocco                            | 17,474(16,774-18,249)    | 33  | 22,227(21,324-23,124)    | 38  | 1.26(1.20,1.32)   | 0.77(0.76,0.79)    | 0.50(0.48,0.53)    | 0.84(0.82,0.86)  | 123 |
| Palestine                          | 1,355(1,301-1,414)       | 125 | 2,587(2,487-2,694)       | 115 | 2.85(2.75,2.94)   | 2.47(2.37,2.56)    | 1.45(1.39,1.50)    | 2.26(2.20,2.31)  | 37  |
| Oman                               | 1,178(1,128-1,230)       | 131 | 2,234(2,120-2,343)       | 122 | -0.12(-0.30,0.05) | 1.14(0.40,1.89)    | 5.85(4.09,7.64)    | 2.22(1.61,2.85)  | 39  |
| Qatar                              | 263(250-276)             | 163 | 1,458(1,383-1,536)       | 136 | 1.97(1.85,2.10)   | 10.85(10.46,11.24) | 5.34(5.17,5.51)    | 6.14(6.00,6.28)  | 1   |
| Saudi Arabia                       | 10,252(9,807-10,729)     | 54  | 18,070(17,237-18,853)    | 48  | 0.99(0.95,1.04)   | 2.13(1.89,2.37)    | 2.74(2.63,2.85)    | 1.95(1.87,2.04)  | 53  |
| Syrian Arab Republic               | 8,111(7,754-8,447)       | 59  | 8,321(7,973-8,668)       | 67  | 1.86(1.76,1.97)   | 1.86(1.76,1.97)    | -3.87(-4.63,-3.11) | 0.05(-0.21,0.30) | 166 |
| Tunisia                            | 5,403(5,168-5,628)       | 74  | 6,757(6,485-7,022)       | 79  | 1.05(1.02,1.08)   | 0.68(0.67,0.70)    | 0.60(0.56,0.64)    | 0.77(0.75,0.79)  | 127 |
| Turkey                             | 53,717(51,480-56,046)    | 12  | 65,172(62,562-67,837)    | 12  | 0.92(0.86,0.99)   | 0.47(0.44,0.50)    | 0.63(0.46,0.80)    | 0.66(0.60,0.72)  | 134 |
| United Arab Emirates               | 1,046(997-1,101)         | 138 | 4,793(4,543-5,056)       | 95  | 4.61(4.55,4.67)   | 10.15(9.80,10.50)  | 1.85(1.54,2.17)    | 5.37(5.21,5.54)  | 2   |
| Yemen                              | 9,088(8,728-9,493)       | 55  | 16,968(16,269-17,688)    | 50  | 2.24(2.20,2.27)   | 1.95(1.93,1.97)    | 2.36(2.33,2.40)    | 2.17(2.15,2.19)  | 41  |
| Afghanistan                        | 8,719(8,373-9,083)       | 56  | 23,306(22,374-24,298)    | 36  | 5.63(4.76,6.50)   | 2.58(2.51,2.66)    | 2.58(2.51,2.66)    | 3.48(3.15,3.80)  | 6   |
| Bangladesh                         | 45,289(43,561-47,173)    | 14  | 62,114(59,617-64,412)    | 14  | 1.20(1.11,1.28)   | 1.29(1.25,1.33)    | 0.82(0.80,0.84)    | 1.10(1.07,1.14)  | 104 |
| Bhutan                             | 266(256-277)             | 161 | 308(297-321)             | 164 | 0.17(-0.36,0.70)  | 0.95(0.83,1.07)    | 0.34(-0.02,0.70)   | 0.53(0.30,0.76)  | 144 |
| India                              | 388,949(375,495-403,587) | 2   | 635,346(613,080-657,984) | 2   | 2.21(2.19,2.23)   | 1.75(1.72,1.77)    | 1.13(1.08,1.17)    | 1.70(1.68,1.72)  | 64  |
| Nepal                              | 7,975(7,691-8,282)       | 61  | 10,310(9,936-10,714)     | 62  | 1.43(1.36,1.50)   | 0.66(0.59,0.72)    | 0.70(0.60,0.81)    | 0.90(0.85,0.95)  | 119 |
| Pakistan                           | 48,627(46,956-50,473)    | 13  | 84,769(81,758-88,026)    | 11  | 1.77(1.74,1.80)   | 2.04(2.03,2.05)    | 2.01(1.98,2.03)    | 1.93(1.92,1.95)  | 54  |
| Angola                             | 6,150(5,882-6,453)       | 71  | 13,975(13,363-14,615)    | 53  | 2.85(2.82,2.87)   | 3.24(3.18,3.29)    | 2.50(2.46,2.53)    | 2.86(2.84,2.88)  | 13  |
| Central African Republic           | 1,642(1,572-1,720)       | 118 | 2,811(2,690-2,945)       | 111 | 2.31(2.28,2.35)   | 2.02(1.97,2.07)    | 1.21(1.06,1.35)    | 1.86(1.81,1.91)  | 58  |
| Congo                              | 1,201(1,147-1,260)       | 129 | 2,170(2,073-2,270)       | 124 | 2.04(2.02,2.07)   | 2.28(2.23,2.32)    | 1.84(1.81,1.88)    | 2.05(2.03,2.07)  | 48  |
| Democratic Republic of the Congo   | 21,175(20,227-22,144)    | 28  | 41,824(39,992-43,691)    | 18  | 2.72(2.66,2.78)   | 2.78(2.69,2.86)    | 1.54(1.50,1.59)    | 2.37(2.33,2.41)  | 30  |
| Equatorial Guinea                  | 255(244-267)             | 164 | 520(495-546)             | 158 | 2.59(2.55,2.63)   | 2.36(2.35,2.38)    | 2.50(2.43,2.57)    | 2.47(2.44,2.50)  | 26  |
| Gabon                              | 483(461-505)             | 150 | 684(654-715)             | 155 | 1.39(1.37,1.41)   | 1.28(1.26,1.30)    | 0.91(0.75,1.07)    | 1.20(1.14,1.25)  | 103 |
| Burundi                            | 1,286(1,234-1,343)       | 128 | 2,716(2,610-2,830)       | 114 | 1.18(0.94,1.42)   | 3.80(3.45,4.15)    | 3.00(2.75,3.25)    | 2.61(2.46,2.77)  | 19  |
| Comoros                            | 106(102-111)             | 174 | 165(159-172)             | 172 | 1.59(1.52,1.67)   | 1.61(1.55,1.67)    | 1.39(1.37,1.42)    | 1.53(1.49,1.56)  | 75  |



|                             |                       |     |                       |     |                  |                    |                 |                 |     |
|-----------------------------|-----------------------|-----|-----------------------|-----|------------------|--------------------|-----------------|-----------------|-----|
| Djibouti                    | 110(105-114)          | 171 | 270(259-281)          | 167 | 2.88(2.41,3.35)  | 3.45(3.34,3.56)    | 3.06(2.82,3.29) | 3.16(2.99,3.34) | 8   |
| Eritrea                     | 745(715-777)          | 143 | 1,546(1,485-1,614)    | 134 | 2.67(1.52,3.84)  | 3.25(2.86,3.64)    | 1.92(1.74,2.10) | 2.63(2.24,3.02) | 17  |
| Ethiopia                    | 12,471(12,006-12,969) | 47  | 23,712(22,854-24,668) | 35  | 2.50(2.32,2.67)  | 2.11(2.09,2.13)    | 2.11(2.09,2.13) | 2.23(2.17,2.28) | 38  |
| Kenya                       | 4,691(4,528-4,881)    | 77  | 9,999(9,644-10,397)   | 63  | 2.62(2.57,2.67)  | 2.90(2.80,2.99)    | 2.36(2.29,2.44) | 2.62(2.58,2.67) | 18  |
| Madagascar                  | 2,897(2,780-3,021)    | 97  | 6,225(5,988-6,484)    | 84  | 2.64(2.59,2.70)  | 2.88(2.85,2.91)    | 2.46(2.42,2.50) | 2.67(2.64,2.69) | 16  |
| Malawi                      | 2,363(2,271-2,465)    | 106 | 4,189(4,019-4,357)    | 99  | 1.12(0.69,1.54)  | 2.14(2.08,2.19)    | 2.65(2.55,2.75) | 1.98(1.84,2.12) | 51  |
| Mauritius                   | 272(261-282)          | 160 | 331(316-345)          | 162 | 1.07(1.01,1.12)  | 0.64(0.60,0.68)    | 0.31(0.29,0.34) | 0.68(0.65,0.70) | 133 |
| Mozambique                  | 3,594(3,451-3,737)    | 89  | 6,996(6,719-7,291)    | 74  | 2.49(2.04,2.94)  | 2.25(2.22,2.28)    | 2.25(2.22,2.28) | 2.32(2.18,2.46) | 35  |
| Rwanda                      | 1,470(1,380-1,560)    | 122 | 2,484(2,349-2,629)    | 117 | 0.12(-2.38,2.68) | 2.32(2.15,2.50)    | 2.32(2.15,2.50) | 1.63(0.83,2.44) | 71  |
| Seychelles                  | 16(15-16)             | 195 | 23(22-24)             | 195 | 1.05(0.98,1.11)  | 1.64(1.63,1.66)    | 1.29(1.26,1.32) | 1.35(1.32,1.37) | 89  |
| Somalia                     | 1,920(1,844-2,002)    | 113 | 5,394(5,184-5,628)    | 91  | 3.76(3.63,3.88)  | 3.71(3.53,3.89)    | 3.59(3.46,3.72) | 3.67(3.57,3.77) | 3   |
| United Republic of Tanzania | 5,932(5,573-6,298)    | 72  | 11,920(11,240-12,660) | 58  | 2.45(2.36,2.54)  | 2.52(2.48,2.57)    | 2.28(2.26,2.30) | 2.42(2.39,2.46) | 28  |
| Uganda                      | 4,000(3,838-4,179)    | 80  | 8,265(7,941-8,613)    | 68  | 2.95(2.89,3.01)  | 2.37(2.34,2.40)    | 2.32(2.22,2.43) | 2.53(2.49,2.58) | 23  |
| Zambia                      | 1,774(1,697-1,851)    | 117 | 3,722(3,573-3,876)    | 102 | 1.87(1.79,1.94)  | 3.01(2.95,3.08)    | 2.91(2.89,2.93) | 2.57(2.54,2.61) | 20  |
| Botswana                    | 436(419-455)          | 153 | 724(694-757)          | 153 | 2.02(1.81,2.23)  | 1.33(1.30,1.36)    | 1.97(1.92,2.01) | 1.76(1.70,1.83) | 62  |
| Lesotho                     | 709(681-738)          | 144 | 745(715-777)          | 151 | 0.24(0.13,0.36)  | -0.29(-0.33,-0.24) | 0.50(0.46,0.53) | 0.15(0.10,0.19) | 162 |
| Namibia                     | 470(450-491)          | 151 | 728(697-759)          | 152 | 2.16(2.09,2.23)  | 1.21(1.15,1.27)    | 1.18(1.13,1.23) | 1.50(1.46,1.54) | 78  |
| South Africa                | 12,278(11,850-12,765) | 49  | 17,912(17,255-18,579) | 49  | 1.91(1.84,1.97)  | 1.01(0.94,1.09)    | 1.05(1.00,1.09) | 1.30(1.26,1.34) | 95  |
| Eswatini                    | 277(265-291)          | 159 | 362(347-378)          | 161 | 1.78(1.70,1.85)  | 0.37(0.31,0.43)    | 0.60(0.55,0.66) | 0.89(0.85,0.93) | 120 |
| Zimbabwe                    | 3,427(3,274-3,584)    | 92  | 4,886(4,664-5,107)    | 93  | 1.04(0.93,1.15)  | 1.27(1.25,1.30)    | 1.38(1.36,1.41) | 1.21(1.17,1.25) | 102 |
| Benin                       | 1,515(1,455-1,578)    | 120 | 3,413(3,275-3,550)    | 108 | 2.36(2.08,2.64)  | 3.23(2.91,3.56)    | 2.88(2.82,2.95) | 2.79(2.65,2.94) | 15  |
| Burkina Faso                | 3,261(3,135-3,394)    | 93  | 6,759(6,493-7,029)    | 78  | 1.63(1.51,1.74)  | 2.88(2.36,3.39)    | 3.01(2.89,3.12) | 2.49(2.32,2.66) | 24  |
| Cameroon                    | 2,997(2,887-3,121)    | 96  | 7,196(6,922-7,493)    | 73  | 2.81(2.72,2.91)  | 3.58(3.37,3.79)    | 2.80(2.74,2.85) | 3.04(2.97,3.12) | 9   |
| Cabo Verde                  | 110(105-114)          | 172 | 158(153-165)          | 175 | 1.46(1.14,1.77)  | 1.30(0.73,1.87)    | 1.05(0.97,1.12) | 1.24(1.03,1.45) | 101 |
| Chad                        | 2,112(2,031-2,198)    | 109 | 4,844(4,645-5,043)    | 94  | 2.29(2.17,2.41)  | 3.15(2.81,3.49)    | 3.19(3.04,3.34) | 2.84(2.70,2.98) | 14  |
| Cote d'Ivoire               | 3,680(3,539-3,840)    | 84  | 6,979(6,708-7,254)    | 75  | 2.53(2.28,2.78)  | 2.31(2.19,2.44)    | 1.73(1.68,1.78) | 2.19(2.10,2.29) | 40  |
| Gambia                      | 319(307-333)          | 157 | 620(596-646)          | 156 | 2.31(2.04,2.58)  | 2.41(2.10,2.73)    | 2.18(2.12,2.24) | 2.26(2.12,2.40) | 36  |
| Ghana                       | 5,224(4,972-5,513)    | 75  | 9,664(9,184-10,160)   | 64  | 1.82(1.41,2.23)  | 2.42(2.27,2.57)    | 2.02(1.96,2.08) | 2.10(1.96,2.25) | 45  |
| Guinea                      | 2,069(1,987-2,149)    | 111 | 3,598(3,463-3,747)    | 103 | 1.77(1.50,2.03)  | 1.76(1.62,1.90)    | 2.32(2.18,2.46) | 1.89(1.78,2.01) | 56  |
| Guinea-Bissau               | 331(318-344)          | 156 | 542(521-564)          | 157 | 1.18(0.76,1.60)  | 1.90(1.85,1.95)    | 1.90(1.85,1.95) | 1.68(1.54,1.81) | 65  |
| Liberia                     | 619(596-644)          | 147 | 1,334(1,284-1,386)    | 140 | 3.08(1.30,4.90)  | 2.73(2.48,2.98)    | 1.89(1.38,2.40) | 2.57(1.99,3.17) | 21  |
| Mali                        | 2,625(2,481-2,771)    | 101 | 5,376(5,061-5,695)    | 92  | 1.65(1.55,1.74)  | 2.92(2.69,3.14)    | 3.00(2.88,3.13) | 2.49(2.38,2.59) | 25  |
| Mauritania                  | 648(623-674)          | 145 | 1,089(1,047-1,133)    | 144 | 1.35(1.04,1.66)  | 2.19(2.04,2.35)    | 1.68(1.62,1.74) | 1.77(1.65,1.88) | 61  |
| Niger                       | 2,860(2,744-2,975)    | 98  | 7,343(7,053-7,658)    | 72  | 2.59(2.23,2.96)  | 3.71(3.57,3.84)    | 3.40(3.35,3.46) | 3.26(3.14,3.39) | 7   |
| Nigeria                     | 35,937(34,687-37,281) | 18  | 64,049(61,790-66,559) | 13  | 2.51(2.49,2.54)  | 2.07(2.02,2.12)    | 1.47(1.39,1.55) | 2.00(1.97,2.04) | 50  |
| Sao Tome and Principe       | 35(33-36)             | 189 | 51(49-53)             | 187 | 0.65(0.30,1.00)  | 1.65(1.61,1.70)    | 1.65(1.61,1.70) | 1.34(1.23,1.46) | 91  |
| Senegal                     | 2,430(2,332-2,531)    | 103 | 4,312(4,149-4,483)    | 97  | 1.88(1.59,2.16)  | 2.23(2.08,2.37)    | 1.74(1.68,1.79) | 1.96(1.86,2.07) | 52  |
| Sierra Leone                | 1,194(1,150-1,239)    | 130 | 2,344(2,249-2,439)    | 119 | 0.96(0.75,1.17)  | 3.47(3.24,3.69)    | 2.45(2.35,2.55) | 2.38(2.24,2.51) | 29  |

|                                       |                                |     |                                |     |                    |                    |                    |                    |     |
|---------------------------------------|--------------------------------|-----|--------------------------------|-----|--------------------|--------------------|--------------------|--------------------|-----|
| Togo                                  | 1,086(1,043-1,134)             | 137 | 2,152(2,071-2,241)             | 126 | 2.20(2.02,2.39)    | 2.82(2.65,2.99)    | 2.15(2.10,2.20)    | 2.36(2.27,2.44)    | 32  |
| American Samoa                        | 15(14-16)                      | 197 | 17(17-18)                      | 197 | 2.10(2.01,2.18)    | -0.02(-0.10,0.05)  | -0.48(-0.67,-0.29) | 0.49(0.42,0.56)    | 147 |
| Bermuda                               | 35(34-37)                      | 188 | 37(36-39)                      | 190 | 0.65(0.61,0.68)    | 0.19(0.16,0.22)    | -0.26(-0.30,-0.23) | 0.19(0.17,0.21)    | 159 |
| Cook Islands                          | 6(6-6)                         | 199 | 6(6-6)                         | 200 | 0.06(0.02,0.11)    | 0.17(0.11,0.23)    | -0.44(-0.50,-0.38) | -0.07(-0.11,-0.04) | 174 |
| Greenland                             | 66(64-69)                      | 178 | 64(61-66)                      | 183 | 0.00(-0.09,0.09)   | -0.38(-0.42,-0.33) | -0.05(-0.12,0.02)  | -0.15(-0.19,-0.11) | 179 |
| Guam                                  | 42(40-44)                      | 186 | 51(49-54)                      | 186 | 1.49(1.30,1.68)    | 0.44(0.42,0.47)    | 0.21(0.16,0.25)    | 0.69(0.63,0.75)    | 132 |
| Monaco                                | 70(67-72)                      | 177 | 83(80-86)                      | 179 | 0.64(0.62,0.67)    | 0.67(0.66,0.68)    | 0.42(0.40,0.44)    | 0.58(0.57,0.59)    | 137 |
| Nauru                                 | 3(3-3)                         | 202 | 3(3-3)                         | 202 | 0.56(0.51,0.60)    | -0.27(-0.40,-0.14) | -0.57(-0.70,-0.44) | -0.10(-0.16,-0.04) | 175 |
| Niue                                  | 1(1-1)                         | 203 | 1(1-1)                         | 203 | -1.35(-1.41,-1.28) | -2.19(-2.38,-2.00) | 0.22(0.18,0.26)    | -1.13(-1.20,-1.07) | 197 |
| Northern Mariana Islands              | 14(14-15)                      | 198 | 15(15-16)                      | 198 | 3.92(3.05,4.80)    | -2.04(-2.18,-1.90) | -2.04(-2.18,-1.90) | 0.14(-0.17,0.45)   | 163 |
| Palau                                 | 5(5-5)                         | 200 | 6(6-7)                         | 199 | 3.17(3.13,3.22)    | -0.46(-0.58,-0.33) | 0.14(0.08,0.20)    | 0.93(0.88,0.98)    | 118 |
| Puerto Rico                           | 1,904(1,824-1,984)             | 114 | 1,830(1,751-1,908)             | 130 | 0.68(0.63,0.74)    | -0.23(-0.28,-0.17) | -0.88(-0.96,-0.79) | -0.15(-0.19,-0.11) | 178 |
| Saint Kitts and Nevis                 | 22(21-23)                      | 194 | 32(31-34)                      | 194 | 0.93(0.79,1.08)    | 1.80(1.78,1.83)    | 1.36(1.30,1.42)    | 1.39(1.34,1.45)    | 87  |
| San Marino                            | 54(52-55)                      | 182 | 73(70-76)                      | 180 | 1.32(1.29,1.34)    | 1.19(1.18,1.20)    | 0.76(0.74,0.78)    | 1.09(1.08,1.10)    | 105 |
| Tokelau                               | 1(1-1)                         | 204 | 0(0-0)                         | 204 | -1.11(-1.36,-0.86) | -2.69(-2.93,-2.45) | 1.02(0.91,1.12)    | -0.85(-0.98,-0.72) | 193 |
| Tuvalu                                | 3(3-4)                         | 201 | 4(4-4)                         | 201 | -0.10(-0.15,-0.05) | 0.76(0.73,0.79)    | 0.82(0.78,0.86)    | 0.50(0.47,0.52)    | 146 |
| United States Virgin Islands          | 57(55-59)                      | 180 | 54(51-56)                      | 185 | 0.43(0.42,0.45)    | -0.40(-0.44,-0.36) | -0.61(-0.64,-0.58) | -0.19(-0.21,-0.17) | 180 |
| South Sudan                           | 1,335(1,281-1,400)             | 126 | 2,020(1,941-2,103)             | 128 | 1.82(1.71,1.94)    | 2.47(2.37,2.57)    | -0.12(-0.49,0.25)  | 1.44(1.31,1.57)    | 80  |
| Sudan                                 | 13,214(12,688-13,747)          | 44  | 20,787(19,974-21,670)          | 40  | 2.00(1.77,2.23)    | 1.26(1.22,1.30)    | 1.55(1.43,1.67)    | 1.58(1.50,1.66)    | 74  |
| <i>Atopic dermatitis</i>              |                                |     |                                |     |                    |                    |                    |                    |     |
| China                                 | 4,805,479(4,598,356-4,998,115) | 1   | 5,837,355(5,576,377-6,077,542) | 1   | 0.61(0.59,0.63)    | 0.64(0.63,0.64)    | 0.78(0.77,0.80)    | 0.67(0.66,0.68)    | 107 |
| Democratic People's Republic of Korea | 99,857(93,265-106,506)         | 30  | 118,601(110,586-126,671)       | 32  | 1.23(1.17,1.29)    | 0.26(0.25,0.27)    | 0.37(0.36,0.38)    | 0.59(0.57,0.61)    | 115 |
| Taiwan (Province of China)            | 103,478(95,736-110,985)        | 27  | 124,411(115,945-134,657)       | 31  | 0.85(0.81,0.88)    | 0.53(0.44,0.62)    | 0.53(0.44,0.61)    | 0.64(0.60,0.69)    | 111 |
| Cambodia                              | 55,975(52,132-59,935)          | 44  | 84,983(79,381-91,030)          | 42  | 1.55(1.51,1.59)    | 1.38(1.36,1.39)    | 1.44(1.41,1.47)    | 1.45(1.43,1.47)    | 68  |
| Indonesia                             | 1,052,089(1,004,552-1,099,115) | 3   | 1,437,343(1,371,678-1,499,105) | 3   | 1.36(1.35,1.37)    | 1.18(1.17,1.20)    | 0.70(0.67,0.73)    | 1.08(1.07,1.09)    | 80  |
| Lao People's Democratic Republic      | 21,938(20,454-23,499)          | 84  | 36,529(34,100-39,204)          | 77  | 2.46(2.42,2.50)    | 1.55(1.52,1.57)    | 1.32(1.31,1.33)    | 1.78(1.76,1.79)    | 59  |
| Malaysia                              | 91,240(85,163-97,712)          | 32  | 155,471(145,241-166,594)       | 27  | 2.89(2.86,2.92)    | 1.57(1.54,1.60)    | 1.15(1.12,1.18)    | 1.85(1.83,1.88)    | 52  |
| Maldives                              | 1,182(1,101-1,267)             | 164 | 2,276(2,117-2,447)             | 159 | 2.07(1.99,2.15)    | 2.08(2.04,2.12)    | 2.69(2.60,2.79)    | 2.27(2.23,2.32)    | 35  |
| Myanmar                               | 213,749(199,507-228,977)       | 18  | 279,249(260,906-298,835)       | 16  | 1.10(1.04,1.15)    | 0.87(0.86,0.88)    | 0.83(0.82,0.83)    | 0.93(0.91,0.95)    | 87  |
| Philippines                           | 333,115(317,751-348,439)       | 11  | 577,429(552,006-601,063)       | 7   | 2.27(2.25,2.28)    | 1.83(1.83,1.84)    | 1.65(1.64,1.67)    | 1.92(1.91,1.92)    | 49  |
| Sri Lanka                             | 80,620(74,875-86,134)          | 34  | 100,917(93,817-108,104)        | 35  | 0.83(0.82,0.85)    | 0.92(0.90,0.95)    | 0.58(0.55,0.61)    | 0.78(0.77,0.79)    | 99  |
| Thailand                              | 288,447(268,696-309,920)       | 12  | 349,286(326,139-375,377)       | 12  | 0.89(0.73,1.06)    | 0.81(0.31,1.30)    | 0.32(0.23,0.41)    | 0.65(0.48,0.82)    | 109 |
| Timor-Leste                           | 4,102(3,813-4,387)             | 141 | 6,871(6,404-7,374)             | 135 | 1.51(1.47,1.54)    | 1.82(1.78,1.87)    | 2.08(2.07,2.09)    | 1.79(1.77,1.81)    | 57  |
| Viet Nam                              | 356,466(333,297-382,099)       | 10  | 482,241(449,509-517,448)       | 9   | 1.27(1.23,1.31)    | 1.12(1.10,1.14)    | 0.75(0.72,0.79)    | 1.05(1.03,1.07)    | 81  |
| Fiji                                  | 3,735(3,465-4,003)             | 145 | 4,401(4,093-4,711)             | 146 | 0.49(0.46,0.52)    | 0.74(0.73,0.75)    | 0.45(0.43,0.48)    | 0.57(0.55,0.58)    | 116 |
| Kiribati                              | 377(350-404)                   | 182 | 590(548-631)                   | 179 | 1.37(1.32,1.41)    | 1.88(1.81,1.94)    | 1.34(1.30,1.38)    | 1.55(1.51,1.58)    | 65  |
| Marshall Islands                      | 232(214-250)                   | 189 | 274(254-294)                   | 185 | 1.04(1.00,1.08)    | 0.49(0.47,0.50)    | 0.24(0.23,0.25)    | 0.57(0.56,0.59)    | 117 |
| Micronesia (Federated States of)      | 525(485-565)                   | 179 | 489(455-524)                   | 182 | 0.36(0.32,0.41)    | -0.61(-0.62,-0.59) | -0.50(-0.53,-0.47) | -0.26(-0.28,-0.24) | 167 |

|                        |                          |     |                          |     |                    |                    |                    |                    |     |
|------------------------|--------------------------|-----|--------------------------|-----|--------------------|--------------------|--------------------|--------------------|-----|
| Papua New Guinea       | 20,439(18,937-21,916)    | 89  | 49,151(45,580-52,645)    | 67  | 3.17(3.15,3.18)    | 3.03(3.00,3.06)    | 3.03(3.00,3.06)    | 3.08(3.07,3.09)    | 12  |
| Samoa                  | 798(739-857)             | 172 | 1,015(945-1,088)         | 174 | 0.45(0.43,0.48)    | 0.61(0.60,0.63)    | 1.46(1.45,1.48)    | 0.83(0.82,0.84)    | 94  |
| Solomon Islands        | 1,733(1,607-1,867)       | 159 | 3,272(3,037-3,508)       | 152 | 2.81(2.77,2.85)    | 2.14(2.11,2.16)    | 1.69(1.66,1.71)    | 2.21(2.19,2.23)    | 39  |
| Tonga                  | 483(448-518)             | 180 | 508(472-542)             | 180 | 0.40(0.38,0.42)    | 0.54(0.52,0.57)    | -0.47(-0.49,-0.44) | 0.18(0.16,0.19)    | 146 |
| Vanuatu                | 773(715-832)             | 173 | 1,462(1,358-1,565)       | 168 | 2.32(2.31,2.33)    | 2.40(2.40,2.41)    | 1.91(1.89,1.93)    | 2.22(2.22,2.23)    | 38  |
| Armenia                | 22,421(19,657-25,480)    | 82  | 14,960(13,353-16,798)    | 114 | -2.65(-2.94,-2.35) | -1.31(-1.39,-1.24) | -0.16(-0.43,0.11)  | -1.39(-1.52,-1.25) | 198 |
| Azerbaijan             | 51,261(44,771-58,478)    | 48  | 53,286(47,396-59,856)    | 62  | -0.35(-0.54,-0.16) | -0.03(-0.10,0.04)  | 0.77(0.60,0.95)    | 0.13(0.04,0.22)    | 150 |
| Georgia                | 31,314(27,792-35,249)    | 65  | 17,994(15,983-20,190)    | 107 | -3.49(-3.58,-3.40) | -2.07(-2.35,-1.80) | -0.31(-0.60,-0.03) | -1.94(-2.08,-1.81) | 204 |
| Kazakhstan             | 109,568(96,164-124,607)  | 26  | 113,437(100,091-128,506) | 33  | -2.87(-2.98,-2.76) | 1.06(0.72,1.40)    | 2.14(1.90,2.39)    | 0.08(-0.06,0.22)   | 153 |
| Kyrgyzstan             | 34,348(29,987-39,413)    | 59  | 44,146(38,786-50,380)    | 69  | -0.17(-0.40,0.06)  | 0.58(0.51,0.64)    | 2.18(1.98,2.38)    | 0.88(0.78,0.98)    | 91  |
| Mongolia               | 17,715(15,417-20,381)    | 96  | 22,556(19,790-25,698)    | 98  | -1.27(-1.42,-1.11) | 0.36(-0.30,1.02)   | 2.99(2.39,3.59)    | 0.72(0.43,1.01)    | 105 |
| Tajikistan             | 46,994(40,746-54,189)    | 52  | 67,192(58,784-76,699)    | 51  | 0.63(0.49,0.76)    | 0.93(0.90,0.97)    | 2.14(2.01,2.27)    | 1.24(1.17,1.30)    | 73  |
| Turkmenistan           | 30,290(26,325-34,836)    | 66  | 32,511(28,612-37,012)    | 82  | -0.37(-0.63,-0.12) | -0.17(-0.55,0.22)  | 1.44(1.33,1.55)    | 0.27(0.12,0.43)    | 145 |
| Uzbekistan             | 174,342(151,337-200,571) | 22  | 216,921(190,780-246,369) | 20  | 0.44(0.32,0.56)    | 0.39(0.34,0.45)    | 1.41(1.28,1.54)    | 0.75(0.68,0.81)    | 103 |
| Albania                | 7,313(6,733-7,932)       | 128 | 4,510(4,239-4,790)       | 144 | -0.81(-1.04,-0.58) | -2.98(-3.19,-2.77) | -0.74(-0.87,-0.62) | -1.68(-1.86,-1.51) | 202 |
| Bosnia and Herzegovina | 8,414(7,850-8,994)       | 123 | 5,088(4,808-5,374)       | 140 | -2.21(-2.92,-1.50) | -1.41(-1.70,-1.13) | -1.75(-1.83,-1.66) | -1.76(-2.01,-1.51) | 203 |
| Bulgaria               | 14,882(13,992-15,798)    | 104 | 10,679(10,110-11,271)    | 124 | -2.40(-2.57,-2.24) | -0.34(-0.40,-0.29) | -0.87(-0.93,-0.81) | -1.15(-1.21,-1.09) | 193 |
| Croatia                | 8,337(7,821-8,853)       | 124 | 6,492(6,138-6,847)       | 137 | -1.13(-1.22,-1.04) | -0.75(-0.92,-0.58) | -0.68(-0.92,-0.44) | -0.83(-0.96,-0.70) | 189 |
| Czechia                | 17,694(16,616-18,786)    | 97  | 17,109(16,131-18,109)    | 108 | -1.42(-1.62,-1.22) | 0.70(0.16,1.23)    | 0.06(-0.17,0.30)   | -0.21(-0.41,0.00)  | 166 |
| Hungary                | 21,397(19,941-23,032)    | 86  | 18,187(17,069-19,401)    | 106 | -0.74(-0.94,-0.53) | -0.29(-0.44,-0.14) | -0.61(-0.71,-0.51) | -0.58(-0.67,-0.48) | 182 |
| North Macedonia        | 3,895(3,628-4,178)       | 143 | 3,428(3,226-3,631)       | 151 | -0.60(-1.32,0.12)  | -0.45(-0.66,-0.23) | -0.05(-0.11,0.01)  | -0.47(-0.76,-0.18) | 177 |
| Montenegro             | 1,197(1,116-1,284)       | 163 | 1,017(958-1,078)         | 173 | -0.62(-0.64,-0.61) | -0.58(-0.60,-0.56) | -0.50(-0.54,-0.47) | -0.57(-0.58,-0.55) | 180 |
| Poland                 | 70,764(66,965-74,602)    | 37  | 56,802(54,785-58,845)    | 59  | -1.37(-1.42,-1.33) | -0.91(-1.01,-0.81) | -0.11(-0.20,-0.03) | -0.78(-0.84,-0.73) | 187 |
| Romania                | 32,524(30,420-34,546)    | 62  | 23,037(21,867-24,190)    | 96  | -1.98(-2.17,-1.79) | -0.80(-1.05,-0.55) | -1.04(-1.18,-0.91) | -1.24(-1.36,-1.11) | 197 |
| Serbia                 | 16,737(15,675-17,824)    | 100 | 14,080(13,292-14,908)    | 116 | -0.66(-1.38,0.06)  | -0.60(-0.65,-0.55) | -0.60(-0.65,-0.55) | -0.62(-0.85,-0.39) | 183 |
| Slovakia               | 9,801(9,157-10,462)      | 118 | 8,659(8,162-9,158)       | 131 | -1.18(-1.27,-1.10) | -0.31(-0.43,-0.19) | 0.02(-0.15,0.19)   | -0.49(-0.57,-0.40) | 178 |
| Slovenia               | 3,375(3,163-3,585)       | 149 | 3,246(3,066-3,429)       | 153 | -1.00(-1.05,-0.94) | 0.22(0.16,0.28)    | 0.27(0.20,0.34)    | -0.13(-0.17,-0.09) | 161 |
| Belarus                | 19,542(18,052-21,103)    | 91  | 15,807(14,703-16,901)    | 112 | -2.07(-2.16,-1.98) | -0.56(-0.72,-0.41) | 0.34(0.09,0.59)    | -0.77(-0.87,-0.67) | 186 |
| Estonia                | 4,417(4,035-4,819)       | 139 | 3,225(2,977-3,467)       | 154 | -3.47(-3.74,-3.21) | 0.01(-0.32,0.34)   | -0.35(-0.60,-0.10) | -1.20(-1.39,-1.02) | 195 |
| Latvia                 | 3,435(3,161-3,737)       | 148 | 2,161(2,023-2,318)       | 161 | -2.97(-3.25,-2.68) | -1.01(-1.08,-0.95) | -0.60(-0.76,-0.45) | -1.59(-1.70,-1.48) | 200 |
| Lithuania              | 6,803(6,290-7,347)       | 130 | 4,419(4,136-4,701)       | 145 | -1.58(-1.74,-1.43) | -1.88(-2.04,-1.72) | -0.93(-0.97,-0.89) | -1.47(-1.55,-1.40) | 199 |
| Republic of Moldova    | 9,099(8,355-9,899)       | 121 | 5,684(5,329-6,060)       | 139 | -2.63(-2.70,-2.56) | -1.30(-1.50,-1.10) | -1.01(-1.12,-0.89) | -1.65(-1.73,-1.57) | 201 |
| Russian Federation     | 385,802(361,309-411,043) | 9   | 344,268(325,625-362,601) | 13  | -2.20(-2.41,-1.99) | 0.09(-0.01,0.19)   | 0.68(0.36,0.99)    | -0.42(-0.55,-0.29) | 173 |
| Ukraine                | 100,488(94,500-106,516)  | 29  | 72,197(68,609-75,746)    | 48  | -2.32(-2.38,-2.26) | -0.65(-0.82,-0.49) | -0.48(-0.58,-0.38) | -1.15(-1.22,-1.08) | 194 |
| Brunei Darussalam      | 1,400(1,282-1,528)       | 161 | 1,742(1,613-1,879)       | 166 | 1.68(1.62,1.74)    | 0.18(0.08,0.27)    | 0.58(0.53,0.63)    | 0.77(0.73,0.82)    | 102 |
| Japan                  | 566,304(537,627-595,411) | 5   | 542,674(516,730-565,971) | 8   | -0.05(-0.11,0.01)  | -0.03(-0.06,-0.01) | -0.38(-0.42,-0.34) | -0.14(-0.17,-0.11) | 163 |
| Republic of Korea      | 184,102(169,867-199,186) | 21  | 183,563(171,269-196,193) | 23  | 0.19(0.09,0.29)    | -0.86(-1.00,-0.72) | 0.68(0.64,0.73)    | 0.00(-0.06,0.07)   | 156 |
| Singapore              | 10,867(9,938-11,819)     | 116 | 18,806(17,364-20,240)    | 104 | 2.90(2.63,3.18)    | 0.90(0.76,1.05)    | 1.99(1.61,2.37)    | 1.90(1.73,2.07)    | 51  |

|                          |                          |     |                          |     |                    |                    |                    |                    |     |
|--------------------------|--------------------------|-----|--------------------------|-----|--------------------|--------------------|--------------------|--------------------|-----|
| Australia                | 51,558(47,536-55,973)    | 47  | 71,104(66,026-76,547)    | 49  | 0.92(0.86,0.98)    | 1.19(1.15,1.22)    | 1.24(1.19,1.28)    | 1.12(1.09,1.15)    | 76  |
| New Zealand              | 13,512(12,749-14,298)    | 109 | 16,847(15,972-17,746)    | 109 | 0.84(0.69,0.99)    | 1.09(1.02,1.15)    | 0.33(0.26,0.40)    | 0.75(0.69,0.81)    | 104 |
| Andorra                  | 182(170-195)             | 192 | 258(243-273)             | 188 | 2.21(1.49,2.93)    | 2.15(1.50,2.80)    | -0.72(-0.91,-0.53) | 1.11(0.79,1.43)    | 77  |
| Austria                  | 28,356(26,545-30,172)    | 67  | 31,336(29,461-33,242)    | 83  | 0.18(0.12,0.23)    | 0.08(0.06,0.11)    | 0.89(0.85,0.92)    | 0.35(0.32,0.37)    | 136 |
| Belgium                  | 36,737(34,367-39,091)    | 57  | 41,696(39,150-44,308)    | 72  | 0.23(0.11,0.36)    | 0.60(0.55,0.65)    | 0.46(0.37,0.54)    | 0.44(0.38,0.49)    | 133 |
| Cyprus                   | 3,095(2,808-3,401)       | 150 | 4,533(4,176-4,914)       | 143 | 0.81(0.74,0.87)    | 1.29(1.26,1.33)    | 1.90(1.85,1.95)    | 1.32(1.29,1.36)    | 72  |
| Denmark                  | 21,008(19,468-22,788)    | 88  | 23,986(22,094-25,927)    | 94  | 1.10(1.01,1.19)    | 0.10(0.07,0.13)    | 0.28(0.08,0.47)    | 0.46(0.40,0.53)    | 130 |
| Finland                  | 18,696(17,460-19,925)    | 94  | 19,679(18,496-20,868)    | 102 | 0.17(0.11,0.24)    | 0.30(0.27,0.33)    | 0.08(0.03,0.14)    | 0.18(0.15,0.21)    | 147 |
| France                   | 272,473(252,533-295,269) | 14  | 298,929(278,135-322,482) | 14  | 0.12(-0.01,0.26)   | 0.70(0.68,0.73)    | 0.09(0.05,0.14)    | 0.33(0.29,0.38)    | 140 |
| Germany                  | 280,057(262,407-297,299) | 13  | 291,026(272,995-309,179) | 15  | -0.27(-0.38,-0.17) | -0.46(-0.70,-0.22) | 1.18(0.91,1.45)    | 0.14(0.01,0.27)    | 148 |
| Greece                   | 31,777(29,373-34,521)    | 64  | 30,651(28,354-32,938)    | 85  | 0.17(0.16,0.19)    | 0.32(0.29,0.35)    | -0.94(-1.01,-0.87) | -0.12(-0.14,-0.09) | 159 |
| Iceland                  | 1,151(1,057-1,257)       | 165 | 1,408(1,302-1,527)       | 170 | 0.84(0.72,0.96)    | 0.84(0.78,0.89)    | 0.40(0.33,0.47)    | 0.70(0.64,0.75)    | 106 |
| Ireland                  | 15,011(13,936-16,167)    | 103 | 18,831(17,589-20,092)    | 103 | -0.09(-0.17,-0.01) | 2.00(1.92,2.07)    | 0.32(0.24,0.39)    | 0.82(0.77,0.87)    | 95  |
| Israel                   | 22,975(21,220-24,905)    | 78  | 42,504(39,328-45,919)    | 71  | 2.43(2.41,2.46)    | 1.97(1.91,2.03)    | 1.98(1.88,2.09)    | 2.14(2.09,2.19)    | 43  |
| Italy                    | 218,741(208,284-229,412) | 17  | 227,737(217,176-237,869) | 19  | -0.07(-0.12,-0.03) | 0.83(0.79,0.88)    | -0.42(-0.60,-0.25) | 0.13(0.07,0.19)    | 151 |
| Luxembourg               | 1,391(1,301-1,482)       | 162 | 2,175(2,040-2,309)       | 160 | 1.79(1.71,1.86)    | 0.96(0.79,1.14)    | 2.07(2.00,2.14)    | 1.57(1.49,1.66)    | 64  |
| Malta                    | 1,489(1,384-1,599)       | 160 | 1,556(1,462-1,651)       | 167 | -0.08(-0.21,0.06)  | -0.24(-0.33,-0.15) | 0.73(0.70,0.77)    | 0.14(0.09,0.19)    | 149 |
| Netherlands              | 55,232(51,572-58,879)    | 45  | 61,156(57,404-65,015)    | 57  | 0.73(0.59,0.87)    | 0.14(0.01,0.28)    | 0.14(0.07,0.20)    | 0.34(0.27,0.40)    | 138 |
| Norway                   | 17,720(16,834-18,673)    | 95  | 21,372(20,336-22,449)    | 100 | 0.92(0.81,1.03)    | 0.47(0.41,0.52)    | 0.55(0.42,0.67)    | 0.65(0.59,0.71)    | 110 |
| Portugal                 | 37,029(34,605-39,497)    | 56  | 35,835(33,789-37,903)    | 78  | 0.05(-0.06,0.15)   | 0.14(0.05,0.24)    | -0.63(-0.70,-0.56) | -0.12(-0.17,-0.06) | 160 |
| Spain                    | 130,818(120,316-141,792) | 25  | 148,717(137,993-159,751) | 28  | -0.15(-0.22,-0.08) | 1.99(1.92,2.06)    | -0.59(-0.76,-0.42) | 0.47(0.39,0.55)    | 128 |
| Sweden                   | 33,540(31,861-35,191)    | 60  | 39,247(37,386-41,088)    | 75  | -0.12(-0.34,0.09)  | 0.84(0.80,0.88)    | 1.13(1.09,1.17)    | 0.56(0.48,0.64)    | 118 |
| Switzerland              | 24,890(23,311-26,489)    | 75  | 31,138(29,254-33,028)    | 84  | 0.53(0.47,0.59)    | 0.49(0.36,0.63)    | 1.35(1.33,1.38)    | 0.78(0.74,0.83)    | 100 |
| United Kingdom           | 246,061(234,216-258,973) | 15  | 274,246(260,489-287,965) | 17  | -0.12(-0.15,-0.09) | 0.48(0.42,0.55)    | 0.66(0.49,0.84)    | 0.35(0.29,0.42)    | 137 |
| Argentina                | 136,814(126,113-148,371) | 24  | 164,407(153,085-177,167) | 25  | 0.57(0.54,0.60)    | 0.57(0.54,0.60)    | 0.72(0.55,0.88)    | 0.63(0.58,0.69)    | 113 |
| Chile                    | 55,193(50,814-60,062)    | 46  | 62,049(57,821-66,609)    | 55  | 0.26(0.09,0.43)    | 0.12(0.07,0.16)    | 0.82(0.63,1.02)    | 0.40(0.31,0.48)    | 135 |
| Uruguay                  | 12,036(11,165-12,993)    | 110 | 12,066(11,261-12,941)    | 120 | 0.43(0.40,0.46)    | -0.50(-0.56,-0.45) | 0.21(0.18,0.23)    | 0.01(-0.02,0.03)   | 155 |
| Canada                   | 60,890(57,865-63,809)    | 41  | 79,873(76,540-83,389)    | 46  | 0.84(0.76,0.92)    | 0.94(0.90,0.97)    | 1.06(1.01,1.12)    | 0.94(0.91,0.98)    | 86  |
| United States of America | 755,408(719,413-790,114) | 4   | 888,977(852,130-925,837) | 4   | 1.45(1.34,1.57)    | -0.40(-0.47,-0.33) | 0.60(0.54,0.67)    | 0.55(0.49,0.61)    | 120 |
| Antigua and Barbuda      | 173(159-187)             | 193 | 195(181-209)             | 192 | 1.93(1.84,2.02)    | -0.11(-0.19,-0.03) | -0.62(-0.63,-0.60) | 0.42(0.38,0.45)    | 134 |
| Bahamas                  | 709(651-768)             | 175 | 845(785-904)             | 176 | 2.05(1.83,2.27)    | 0.50(0.40,0.61)    | -0.60(-0.76,-0.44) | 0.64(0.54,0.73)    | 112 |
| Barbados                 | 631(583-679)             | 178 | 629(589-671)             | 178 | -0.45(-0.52,-0.38) | 0.47(0.35,0.59)    | -0.22(-0.28,-0.15) | -0.03(-0.09,0.03)  | 157 |
| Belize                   | 647(588-708)             | 177 | 1,097(1,010-1,186)       | 172 | 1.56(1.54,1.58)    | 2.66(2.62,2.70)    | 1.34(1.32,1.37)    | 1.85(1.82,1.87)    | 53  |
| Cuba                     | 26,961(24,843-29,034)    | 72  | 24,048(22,476-25,628)    | 93  | -0.40(-0.49,-0.30) | -0.74(-1.39,-0.09) | -0.20(-0.52,0.12)  | -0.42(-0.66,-0.19) | 174 |
| Dominica                 | 217(199-235)             | 191 | 157(146-168)             | 193 | -1.01(-1.04,-0.98) | -1.20(-1.21,-1.19) | -1.11(-1.14,-1.09) | -1.12(-1.13,-1.10) | 192 |
| Dominican Republic       | 23,465(21,324-25,576)    | 76  | 29,693(27,285-32,070)    | 87  | 1.36(1.31,1.41)    | 0.20(0.16,0.23)    | 0.94(0.91,0.97)    | 0.81(0.78,0.83)    | 96  |
| Grenada                  | 271(247-295)             | 186 | 241(224-259)             | 189 | 0.30(0.17,0.42)    | -0.50(-0.70,-0.30) | -1.08(-1.10,-1.05) | -0.41(-0.48,-0.33) | 172 |
| Guyana                   | 2,427(2,212-2,643)       | 153 | 2,040(1,879-2,201)       | 164 | -0.17(-0.26,-0.09) | -1.62(-1.72,-1.53) | 0.17(-0.04,0.38)   | -0.57(-0.65,-0.49) | 181 |

|                                    |                          |     |                          |     |                    |                    |                    |                    |     |
|------------------------------------|--------------------------|-----|--------------------------|-----|--------------------|--------------------|--------------------|--------------------|-----|
| Haiti                              | 22,311(20,250-24,413)    | 83  | 37,543(34,271-40,801)    | 76  | 1.89(1.78,2.00)    | 2.03(1.95,2.12)    | 1.57(1.52,1.61)    | 1.82(1.77,1.87)    | 56  |
| Jamaica                            | 7,149(6,535-7,771)       | 129 | 6,551(6,066-7,021)       | 136 | 0.33(0.25,0.41)    | -0.68(-0.72,-0.64) | -0.52(-0.54,-0.50) | -0.29(-0.33,-0.26) | 169 |
| Saint Lucia                        | 442(402-482)             | 181 | 376(350-403)             | 183 | -0.07(-0.10,-0.05) | -0.81(-0.82,-0.80) | -0.77(-0.79,-0.76) | -0.56(-0.57,-0.55) | 179 |
| Saint Vincent and the Grenadines   | 341(311-371)             | 184 | 267(248-287)             | 187 | -0.91(-0.92,-0.89) | -0.96(-1.00,-0.91) | -0.64(-0.65,-0.63) | -0.83(-0.85,-0.82) | 190 |
| Suriname                           | 1,142(1,045-1,240)       | 166 | 1,451(1,341-1,561)       | 169 | 0.63(0.52,0.74)    | 1.32(1.27,1.37)    | 0.48(0.38,0.57)    | 0.85(0.80,0.91)    | 93  |
| Trinidad and Tobago                | 3,548(3,240-3,852)       | 147 | 3,123(2,908-3,342)       | 155 | -1.33(-1.37,-1.29) | 0.00(-0.04,0.04)   | -0.04(-0.08,0.01)  | -0.44(-0.46,-0.41) | 175 |
| Bolivia (Plurinational State of)   | 21,407(19,918-22,998)    | 85  | 34,834(32,634-37,199)    | 81  | 2.06(2.00,2.12)    | 1.11(1.06,1.15)    | 2.03(1.90,2.15)    | 1.69(1.64,1.73)    | 62  |
| Ecuador                            | 32,844(30,486-35,345)    | 61  | 48,695(45,541-51,955)    | 68  | 1.52(1.47,1.57)    | 1.28(1.25,1.30)    | 1.33(1.29,1.38)    | 1.38(1.35,1.41)    | 70  |
| Peru                               | 63,015(58,522-67,776)    | 40  | 81,098(76,096-86,242)    | 45  | 0.47(0.44,0.50)    | 0.47(0.44,0.50)    | 1.87(1.61,2.13)    | 0.90(0.82,0.99)    | 89  |
| Colombia                           | 80,351(73,843-87,322)    | 35  | 92,590(86,178-99,095)    | 37  | 1.58(1.49,1.68)    | 0.13(0.07,0.20)    | -0.10(-0.21,0.02)  | 0.50(0.44,0.55)    | 125 |
| Costa Rica                         | 7,673(7,054-8,349)       | 126 | 8,887(8,283-9,504)       | 128 | 1.26(1.12,1.41)    | 0.00(-0.12,0.13)   | 0.28(0.25,0.32)    | 0.52(0.45,0.58)    | 124 |
| El Salvador                        | 13,727(12,582-14,936)    | 108 | 13,148(12,197-14,148)    | 118 | 0.86(0.78,0.94)    | -1.34(-1.40,-1.27) | 0.04(0.00,0.08)    | -0.15(-0.19,-0.11) | 164 |
| Guatemala                          | 23,419(21,311-25,620)    | 77  | 41,149(37,973-44,549)    | 73  | 2.88(2.84,2.92)    | 1.70(1.63,1.76)    | 1.35(1.30,1.40)    | 1.96(1.93,2.00)    | 48  |
| Honduras                           | 13,812(12,593-15,124)    | 107 | 22,992(21,210-24,894)    | 97  | 2.04(2.02,2.06)    | 1.58(1.56,1.61)    | 1.70(1.69,1.71)    | 1.77(1.76,1.78)    | 60  |
| Mexico                             | 223,237(209,132-237,501) | 16  | 254,711(240,728-267,820) | 18  | 0.94(0.91,0.97)    | 0.31(0.29,0.33)    | 0.13(0.11,0.15)    | 0.46(0.44,0.48)    | 131 |
| Nicaragua                          | 11,439(10,443-12,530)    | 114 | 14,394(13,307-15,555)    | 115 | 1.04(0.99,1.08)    | 0.59(0.57,0.61)    | 0.75(0.70,0.80)    | 0.79(0.76,0.81)    | 97  |
| Panama                             | 5,731(5,274-6,216)       | 133 | 8,755(8,116-9,426)       | 129 | 1.51(1.44,1.58)    | 1.24(1.07,1.42)    | 1.77(1.65,1.89)    | 1.51(1.43,1.58)    | 66  |
| Venezuela (Bolivarian Republic of) | 47,542(43,655-51,703)    | 51  | 55,470(51,593-59,439)    | 60  | 1.30(0.89,1.71)    | 0.96(0.82,1.09)    | -0.95(-1.27,-0.64) | 0.46(0.27,0.64)    | 132 |
| Brazil                             | 516,640(487,448-548,724) | 6   | 603,400(575,850-632,485) | 6   | 0.53(0.49,0.57)    | 0.63(0.61,0.65)    | 0.44(0.39,0.48)    | 0.54(0.52,0.56)    | 123 |
| Paraguay                           | 16,152(14,724-17,647)    | 101 | 21,495(19,860-23,179)    | 99  | 1.40(1.28,1.52)    | 0.88(0.86,0.89)    | 0.72(0.67,0.77)    | 0.99(0.95,1.03)    | 85  |
| Algeria                            | 59,366(55,003-64,012)    | 42  | 82,659(76,892-88,643)    | 44  | 0.97(0.92,1.03)    | 1.15(1.13,1.17)    | 1.34(1.29,1.39)    | 1.15(1.12,1.18)    | 75  |
| Bahrain                            | 1,097(1,016-1,179)       | 167 | 2,277(2,108-2,453)       | 158 | 1.76(1.68,1.85)    | 5.55(5.40,5.70)    | 0.46(0.22,0.69)    | 2.52(2.41,2.62)    | 25  |
| Egypt                              | 93,660(85,503-102,135)   | 31  | 144,105(132,649-156,308) | 29  | 0.98(0.93,1.03)    | 2.01(1.81,2.21)    | 1.48(1.40,1.55)    | 1.49(1.42,1.56)    | 67  |
| Iran (Islamic Republic of)         | 144,877(135,875-154,077) | 23  | 159,855(151,455-168,668) | 26  | -0.36(-0.48,-0.23) | 0.63(0.59,0.67)    | 0.68(0.55,0.81)    | 0.34(0.28,0.41)    | 139 |
| Iraq                               | 43,866(39,969-48,054)    | 53  | 88,559(81,120-96,443)    | 40  | 4.01(3.51,4.53)    | 1.50(0.56,2.45)    | 2.06(1.90,2.21)    | 2.52(2.17,2.87)    | 26  |
| Jordan                             | 9,184(8,508-9,927)       | 120 | 23,720(22,083-25,507)    | 95  | 1.84(1.34,2.34)    | 4.10(3.16,5.05)    | 4.35(4.19,4.50)    | 3.38(3.04,3.73)    | 9   |
| Kuwait                             | 3,800(3,528-4,085)       | 144 | 7,827(7,233-8,416)       | 132 | -0.08(-0.44,0.28)  | 3.85(3.70,4.01)    | 3.72(3.39,4.05)    | 2.55(2.37,2.73)    | 22  |
| Lebanon                            | 7,377(6,841-7,943)       | 127 | 9,948(9,249-10,671)      | 125 | 0.10(0.02,0.18)    | 0.63(0.47,0.79)    | 2.40(1.89,2.91)    | 1.00(0.83,1.17)    | 83  |
| Libya                              | 10,261(9,508-11,095)     | 117 | 11,877(11,022-12,753)    | 121 | 0.77(0.69,0.84)    | 0.95(0.91,0.98)    | -0.23(-0.31,-0.15) | 0.50(0.46,0.54)    | 126 |
| Morocco                            | 57,429(53,317-61,891)    | 43  | 67,474(62,802-72,470)    | 50  | 1.09(1.05,1.12)    | 0.70(0.68,0.72)    | -0.09(-0.13,-0.06) | 0.56(0.54,0.59)    | 119 |
| Palestine                          | 5,370(4,956-5,823)       | 135 | 10,963(10,175-11,811)    | 122 | 3.71(3.66,3.76)    | 2.66(2.61,2.71)    | 1.14(1.07,1.20)    | 2.49(2.46,2.53)    | 28  |
| Oman                               | 4,633(4,287-5,000)       | 138 | 8,698(8,013-9,382)       | 130 | 0.62(0.49,0.75)    | 1.31(0.79,1.84)    | 4.74(3.58,5.92)    | 2.17(1.75,2.59)    | 41  |
| Qatar                              | 908(838-979)             | 171 | 4,683(4,297-5,082)       | 141 | 1.99(1.84,2.14)    | 9.43(8.98,9.88)    | 5.95(5.72,6.18)    | 5.85(5.68,6.02)    | 1   |
| Saudi Arabia                       | 38,011(35,250-40,994)    | 55  | 63,185(58,368-68,010)    | 54  | 1.88(1.81,1.95)    | 1.71(1.68,1.74)    | 1.71(1.65,1.77)    | 1.76(1.73,1.80)    | 61  |
| Syrian Arab Republic               | 32,246(29,806-34,871)    | 63  | 26,772(24,870-28,848)    | 91  | 2.09(1.95,2.23)    | 1.76(0.94,2.58)    | -6.23(-6.97,-5.49) | -0.72(-1.17,-0.27) | 184 |
| Tunisia                            | 18,845(17,486-20,315)    | 93  | 20,492(19,082-21,970)    | 101 | 0.54(0.50,0.57)    | 0.28(0.27,0.30)    | 0.07(0.04,0.10)    | 0.29(0.27,0.31)    | 144 |
| Turkey                             | 200,110(184,725-217,088) | 19  | 207,399(192,007-224,118) | 21  | 0.89(0.73,1.04)    | -0.36(-0.50,-0.23) | -0.05(-0.16,0.06)  | 0.13(0.05,0.22)    | 152 |
| United Arab Emirates               | 4,006(3,698-4,320)       | 142 | 13,726(12,484-15,040)    | 117 | 4.20(4.15,4.24)    | 9.65(9.37,9.93)    | -0.23(-0.48,0.01)  | 4.36(4.23,4.49)    | 3   |

|                                  |                                |     |                                |     |                   |                    |                    |                    |     |
|----------------------------------|--------------------------------|-----|--------------------------------|-----|-------------------|--------------------|--------------------|--------------------|-----|
| Yemen                            | 36,342(33,504-39,513)          | 58  | 72,702(67,418-78,377)          | 47  | 2.60(2.56,2.64)   | 3.04(2.98,3.09)    | 1.61(1.52,1.70)    | 2.42(2.38,2.45)    | 30  |
| Afghanistan                      | 27,448(25,426-29,667)          | 70  | 95,041(87,931-102,778)         | 36  | 7.36(5.91,8.83)   | 3.22(3.12,3.33)    | 3.22(3.12,3.33)    | 4.43(3.96,4.91)    | 2   |
| Bangladesh                       | 425,466(386,391-472,996)       | 8   | 433,543(394,804-478,184)       | 11  | 0.72(0.64,0.79)   | 0.03(0.01,0.05)    | -0.48(-0.50,-0.45) | 0.07(0.04,0.09)    | 154 |
| Bhutan                           | 2,243(2,045-2,494)             | 156 | 1,971(1,799-2,168)             | 165 | -0.42(-1.12,0.27) | -0.07(-0.18,0.05)  | -0.90(-1.21,-0.59) | -0.44(-0.68,-0.19) | 176 |
| India                            | 2,988,495(2,798,828-3,193,453) | 2   | 3,739,095(3,518,140-3,973,898) | 2   | 1.36(1.32,1.40)   | 0.96(0.93,0.99)    | -0.02(-0.05,0.00)  | 0.78(0.76,0.80)    | 101 |
| Nepal                            | 74,007(67,365-82,068)          | 36  | 88,697(80,789-98,054)          | 39  | 1.63(1.59,1.68)   | 0.46(0.40,0.52)    | -0.19(-0.21,-0.17) | 0.62(0.60,0.65)    | 114 |
| Pakistan                         | 439,012(409,842-470,057)       | 7   | 782,596(732,900-836,309)       | 5   | 2.22(2.19,2.25)   | 2.38(2.36,2.40)    | 1.44(1.39,1.48)    | 2.02(2.00,2.04)    | 46  |
| Angola                           | 22,798(20,662-25,199)          | 79  | 65,851(59,692-72,837)          | 52  | 3.82(3.79,3.85)   | 4.19(4.15,4.23)    | 3.15(3.02,3.28)    | 3.74(3.70,3.79)    | 5   |
| Central African Republic         | 5,961(5,408-6,590)             | 132 | 10,840(9,872-11,962)           | 123 | 2.72(2.64,2.79)   | 2.22(2.16,2.28)    | 1.23(1.03,1.44)    | 2.07(2.00,2.14)    | 45  |
| Congo                            | 5,267(4,793-5,813)             | 136 | 9,907(9,040-10,878)            | 126 | 2.01(1.97,2.04)   | 2.77(2.72,2.81)    | 1.76(1.63,1.90)    | 2.20(2.15,2.25)    | 40  |
| Democratic Republic of the Congo | 87,241(78,991-96,497)          | 33  | 180,701(164,303-199,307)       | 24  | 2.66(2.64,2.68)   | 2.80(2.78,2.83)    | 2.11(2.03,2.18)    | 2.54(2.51,2.56)    | 23  |
| Equatorial Guinea                | 992(898-1,101)                 | 169 | 2,686(2,449-2,956)             | 157 | 4.49(4.47,4.51)   | 3.98(3.92,4.03)    | 1.97(1.87,2.06)    | 3.50(3.46,3.54)    | 8   |
| Gabon                            | 2,066(1,880-2,277)             | 157 | 3,045(2,789-3,336)             | 156 | 1.99(1.96,2.03)   | 1.20(1.18,1.23)    | 0.84(0.82,0.87)    | 1.34(1.33,1.36)    | 71  |
| Burundi                          | 12,028(11,185-13,052)          | 111 | 24,576(22,846-26,644)          | 92  | 1.06(0.82,1.30)   | 3.58(3.25,3.91)    | 2.98(2.65,3.30)    | 2.53(2.36,2.70)    | 24  |
| Comoros                          | 959(892-1,039)                 | 170 | 1,164(1,087-1,249)             | 171 | 1.17(1.13,1.21)   | 0.66(0.64,0.69)    | 0.17(0.14,0.19)    | 0.67(0.65,0.69)    | 108 |
| Djibouti                         | 1,007(937-1,090)               | 168 | 2,083(1,943-2,241)             | 162 | 1.87(0.88,2.86)   | 3.22(3.14,3.30)    | 2.45(2.15,2.74)    | 2.56(2.23,2.89)    | 21  |
| Eritrea                          | 6,351(5,907-6,886)             | 131 | 12,363(11,498-13,349)          | 119 | 3.39(3.24,3.55)   | 2.65(2.53,2.77)    | 1.18(0.97,1.38)    | 2.40(2.27,2.52)    | 31  |
| Ethiopia                         | 100,804(94,457-107,200)        | 28  | 197,185(185,000-210,531)       | 22  | 2.62(2.44,2.81)   | 2.08(2.02,2.13)    | 2.37(2.26,2.49)    | 2.37(2.29,2.44)    | 32  |
| Kenya                            | 43,383(40,788-46,095)          | 54  | 82,707(77,444-87,639)          | 43  | 2.39(2.37,2.40)   | 3.02(3.00,3.04)    | 1.39(1.35,1.43)    | 2.25(2.23,2.27)    | 36  |
| Madagascar                       | 24,965(23,226-27,058)          | 74  | 50,681(47,139-54,742)          | 64  | 2.86(2.83,2.88)   | 2.64(2.58,2.70)    | 1.96(1.88,2.03)    | 2.49(2.46,2.52)    | 29  |
| Malawi                           | 20,086(18,682-21,747)          | 90  | 35,210(32,733-38,148)          | 80  | 1.28(0.84,1.71)   | 2.66(2.60,2.71)    | 1.83(1.72,1.94)    | 1.97(1.83,2.11)    | 47  |
| Mauritius                        | 5,532(5,163-5,943)             | 134 | 6,355(5,938-6,826)             | 138 | 0.98(0.96,0.99)   | 0.40(0.35,0.44)    | 0.07(0.07,0.08)    | 0.47(0.46,0.49)    | 129 |
| Mozambique                       | 27,086(25,167-29,360)          | 71  | 61,648(57,246-66,835)          | 56  | 3.38(3.08,3.69)   | 2.82(2.79,2.85)    | 2.50(2.41,2.58)    | 2.89(2.80,2.99)    | 15  |
| Rwanda                           | 11,241(10,325-12,292)          | 115 | 16,648(15,394-18,041)          | 111 | -0.28(-2.94,2.45) | 1.75(1.57,1.93)    | 1.75(1.57,1.93)    | 1.11(0.26,1.97)    | 78  |
| Seychelles                       | 374(350-401)                   | 183 | 499(467-535)                   | 181 | 0.95(0.94,0.96)   | 1.06(1.06,1.07)    | 0.97(0.96,0.98)    | 1.00(0.99,1.00)    | 84  |
| Somalia                          | 15,030(13,936-16,318)          | 102 | 42,802(39,808-46,374)          | 70  | 3.98(3.77,4.18)   | 3.81(3.73,3.88)    | 3.41(3.30,3.51)    | 3.71(3.63,3.80)    | 6   |
| United Republic of Tanzania      | 69,568(64,567-75,156)          | 38  | 142,350(132,767-152,611)       | 30  | 2.75(2.73,2.76)   | 2.49(2.37,2.61)    | 2.26(2.19,2.33)    | 2.50(2.46,2.55)    | 27  |
| Uganda                           | 47,800(43,754-52,387)          | 50  | 106,965(97,816-117,333)        | 34  | 3.80(3.72,3.88)   | 2.84(2.77,2.91)    | 1.77(1.69,1.86)    | 2.80(2.75,2.85)    | 17  |
| Zambia                           | 16,855(15,680-18,260)          | 99  | 35,549(33,056-38,442)          | 79  | 2.33(2.31,2.35)   | 2.88(2.84,2.92)    | 2.58(2.56,2.61)    | 2.61(2.59,2.63)    | 20  |
| Botswana                         | 2,685(2,439-2,961)             | 152 | 3,807(3,495-4,162)             | 149 | 1.59(1.55,1.64)   | 0.99(0.97,1.02)    | 1.06(1.00,1.12)    | 1.21(1.18,1.24)    | 74  |
| Lesotho                          | 3,637(3,312-4,003)             | 146 | 3,478(3,187-3,805)             | 150 | 0.20(0.11,0.29)   | -0.56(-0.59,-0.54) | -0.04(-0.05,-0.02) | -0.15(-0.18,-0.12) | 165 |
| Namibia                          | 2,892(2,635-3,191)             | 151 | 4,322(3,955-4,739)             | 147 | 2.31(2.26,2.37)   | 0.82(0.79,0.85)    | 1.05(1.02,1.07)    | 1.39(1.37,1.41)    | 69  |
| South Africa                     | 67,701(63,469-72,186)          | 39  | 86,399(81,393-91,661)          | 41  | 1.47(1.38,1.56)   | 0.54(0.45,0.64)    | 0.59(0.55,0.63)    | 0.86(0.80,0.92)    | 92  |
| Eswatini                         | 1,805(1,637-1,999)             | 158 | 2,067(1,889-2,268)             | 163 | 1.54(1.42,1.66)   | 0.01(-0.02,0.03)   | -0.07(-0.08,-0.06) | 0.48(0.43,0.52)    | 127 |
| Zimbabwe                         | 22,566(20,489-24,949)          | 80  | 29,304(26,713-32,207)          | 88  | 0.73(0.62,0.84)   | 0.83(0.81,0.85)    | 1.14(1.03,1.25)    | 0.90(0.85,0.96)    | 90  |
| Benin                            | 11,685(10,882-12,501)          | 113 | 28,140(26,321-30,059)          | 89  | 2.92(2.90,2.94)   | 3.28(3.26,3.30)    | 2.99(2.91,3.07)    | 3.07(3.04,3.10)    | 13  |
| Burkina Faso                     | 22,460(20,963-24,017)          | 81  | 50,609(47,328-54,069)          | 65  | 2.45(2.43,2.47)   | 3.05(3.04,3.06)    | 3.01(3.00,3.03)    | 2.84(2.83,2.85)    | 16  |
| Cameroon                         | 26,277(24,559-28,254)          | 73  | 64,746(60,812-68,894)          | 53  | 3.33(3.28,3.37)   | 3.98(3.94,4.01)    | 2.18(2.10,2.27)    | 3.17(3.14,3.21)    | 10  |

|                              |                          |     |                          |     |                    |                    |                    |                    |     |
|------------------------------|--------------------------|-----|--------------------------|-----|--------------------|--------------------|--------------------|--------------------|-----|
| Cabo Verde                   | 762(713-813)             | 174 | 894(843-949)             | 175 | 1.49(1.40,1.57)    | 0.15(0.13,0.17)    | 0.02(-0.03,0.07)   | 0.55(0.52,0.59)    | 121 |
| Chad                         | 14,341(13,372-15,364)    | 105 | 39,627(36,932-42,410)    | 74  | 3.41(3.39,3.43)    | 3.75(3.74,3.76)    | 3.56(3.55,3.56)    | 3.57(3.56,3.58)    | 7   |
| Cote d'Ivoire                | 28,071(26,210-30,021)    | 69  | 53,464(50,138-57,048)    | 61  | 2.88(2.83,2.93)    | 2.21(2.18,2.25)    | 1.64(1.60,1.68)    | 2.25(2.22,2.27)    | 37  |
| Gambia                       | 2,305(2,152-2,467)       | 154 | 4,537(4,260-4,844)       | 142 | 2.84(2.74,2.93)    | 2.55(2.53,2.57)    | 1.66(1.54,1.78)    | 2.36(2.31,2.41)    | 33  |
| Ghana                        | 28,164(26,367-30,158)    | 68  | 49,431(46,548-52,620)    | 66  | 0.96(0.59,1.34)    | 2.35(2.31,2.39)    | 2.35(2.31,2.39)    | 1.92(1.80,2.04)    | 50  |
| Guinea                       | 14,242(13,297-15,237)    | 106 | 27,654(25,891-29,529)    | 90  | 2.56(2.18,2.95)    | 2.08(1.92,2.24)    | 2.49(2.44,2.54)    | 2.32(2.17,2.48)    | 34  |
| Guinea-Bissau                | 2,298(2,148-2,456)       | 155 | 3,906(3,665-4,170)       | 148 | 1.92(1.87,1.97)    | 1.98(1.97,2.00)    | 1.63(1.60,1.67)    | 1.85(1.83,1.87)    | 54  |
| Liberia                      | 4,247(3,980-4,536)       | 140 | 9,178(8,625-9,779)       | 127 | 3.84(2.23,5.47)    | 3.16(2.78,3.55)    | 0.84(0.28,1.41)    | 2.65(2.10,3.20)    | 18  |
| Mali                         | 21,208(19,591-23,087)    | 87  | 52,301(48,395-56,682)    | 63  | 2.38(2.25,2.51)    | 3.61(3.55,3.67)    | 3.39(3.35,3.43)    | 3.15(3.10,3.20)    | 11  |
| Mauritania                   | 4,649(4,345-4,969)       | 137 | 7,790(7,318-8,304)       | 133 | 2.04(2.01,2.07)    | 2.30(2.26,2.35)    | 1.04(0.97,1.12)    | 1.79(1.76,1.83)    | 58  |
| Niger                        | 19,346(18,029-20,725)    | 92  | 57,108(53,182-61,151)    | 58  | 3.57(3.47,3.68)    | 4.23(4.21,4.24)    | 3.57(3.54,3.59)    | 3.80(3.76,3.83)    | 4   |
| Nigeria                      | 197,113(184,703-210,390) | 20  | 452,274(424,739-482,293) | 10  | 3.18(3.16,3.19)    | 3.33(3.30,3.37)    | 2.24(2.19,2.29)    | 2.92(2.90,2.94)    | 14  |
| Sao Tome and Principe        | 268(251-287)             | 187 | 368(346-392)             | 184 | 1.31(1.26,1.36)    | 1.69(1.62,1.76)    | 0.27(0.16,0.39)    | 1.09(1.03,1.14)    | 79  |
| Senegal                      | 17,676(16,511-18,897)    | 98  | 30,015(28,189-32,011)    | 86  | 1.81(1.78,1.85)    | 2.24(2.18,2.29)    | 1.37(1.24,1.51)    | 1.83(1.78,1.87)    | 55  |
| Sierra Leone                 | 8,007(7,487-8,552)       | 125 | 16,689(15,670-17,809)    | 110 | 1.42(0.92,1.92)    | 3.66(3.46,3.86)    | 2.49(2.41,2.56)    | 2.64(2.45,2.82)    | 19  |
| Togo                         | 8,531(7,967-9,120)       | 122 | 15,645(14,685-16,694)    | 113 | 2.24(2.21,2.27)    | 2.48(2.44,2.52)    | 1.52(1.40,1.64)    | 2.10(2.06,2.15)    | 44  |
| American Samoa               | 244(226-261)             | 188 | 268(249-287)             | 186 | 1.84(1.72,1.96)    | -0.45(-0.49,-0.41) | -0.41(-0.51,-0.31) | 0.31(0.25,0.36)    | 142 |
| Bermuda                      | 139(129-149)             | 194 | 129(121-137)             | 196 | 0.27(0.23,0.32)    | -0.08(-0.11,-0.06) | -1.11(-1.13,-1.08) | -0.29(-0.31,-0.27) | 170 |
| Cook Islands                 | 93(87-100)               | 198 | 88(82-94)                | 199 | -0.32(-0.42,-0.21) | 0.02(-0.26,0.29)   | -0.43(-0.61,-0.25) | -0.28(-0.39,-0.16) | 168 |
| Greenland                    | 130(122-137)             | 195 | 125(119-131)             | 197 | 0.09(-0.11,0.29)   | -0.41(-0.49,-0.33) | 0.01(-0.19,0.22)   | -0.13(-0.23,-0.03) | 162 |
| Guam                         | 655(607-701)             | 176 | 823(768-879)             | 177 | 1.79(1.75,1.83)    | 0.13(0.10,0.15)    | 0.47(0.45,0.48)    | 0.79(0.77,0.80)    | 98  |
| Monaco                       | 101(95-107)              | 197 | 131(124-140)             | 195 | 1.23(1.15,1.31)    | 0.68(0.63,0.72)    | 0.87(0.83,0.90)    | 0.93(0.90,0.96)    | 88  |
| Nauru                        | 52(48-56)                | 201 | 52(48-56)                | 202 | 0.22(0.18,0.25)    | -0.25(-0.27,-0.23) | -0.04(-0.07,-0.01) | -0.03(-0.05,-0.01) | 158 |
| Niue                         | 11(11-12)                | 203 | 8(7-9)                   | 203 | -1.83(-1.87,-1.79) | -2.09(-2.17,-2.00) | 0.32(0.29,0.35)    | -1.23(-1.26,-1.20) | 196 |
| Northern Mariana Islands     | 218(201-235)             | 190 | 199(185-215)             | 191 | 4.96(4.23,5.69)    | -3.96(-4.17,-3.75) | -2.73(-3.10,-2.36) | -0.39(-0.69,-0.09) | 171 |
| Palau                        | 74(69-79)                | 200 | 82(76-88)                | 200 | 2.25(2.16,2.35)    | -0.48(-0.56,-0.41) | -0.65(-0.73,-0.56) | 0.32(0.26,0.37)    | 141 |
| Puerto Rico                  | 9,463(8,739-10,200)      | 119 | 7,033(6,593-7,486)       | 134 | 0.14(0.02,0.26)    | -1.12(-1.19,-1.04) | -2.17(-2.29,-2.06) | -1.04(-1.11,-0.97) | 191 |
| Saint Kitts and Nevis        | 123(112-133)             | 196 | 133(124-143)             | 194 | 0.15(0.11,0.20)    | 0.59(0.57,0.61)    | 0.12(0.07,0.17)    | 0.30(0.27,0.32)    | 143 |
| San Marino                   | 87(81-93)                | 199 | 118(110-125)             | 198 | 1.81(1.79,1.83)    | 1.06(1.00,1.11)    | 0.24(0.22,0.26)    | 1.05(1.03,1.07)    | 82  |
| Tokelau                      | 9(8-9)                   | 204 | 7(7-7)                   | 204 | -0.84(-1.07,-0.61) | -3.13(-3.29,-2.98) | 1.32(1.25,1.40)    | -0.80(-0.89,-0.70) | 188 |
| Tuvalu                       | 48(45-51)                | 202 | 56(52-60)                | 201 | 0.00(-0.02,0.01)   | 0.74(0.71,0.77)    | 0.90(0.90,0.91)    | 0.55(0.54,0.56)    | 122 |
| United States Virgin Islands | 295(270-319)             | 185 | 238(221-254)             | 190 | -0.21(-0.23,-0.20) | -0.97(-0.98,-0.97) | -1.01(-1.02,-1.00) | -0.74(-0.74,-0.73) | 185 |
| South Sudan                  | 11,788(10,966-12,754)    | 112 | 18,513(17,194-20,032)    | 105 | 2.57(2.53,2.61)    | 2.57(2.53,2.61)    | -0.57(-1.20,0.06)  | 1.58(1.38,1.78)    | 63  |
| Sudan                        | 49,558(45,899-53,520)    | 49  | 92,193(85,488-99,360)    | 38  | 3.17(2.90,3.43)    | 1.97(1.88,2.07)    | 1.48(1.39,1.56)    | 2.17(2.08,2.26)    | 42  |
